# Supplementary material for: The Heptameric SmAP1 and SmAP2 Proteins of the Crenarchaeon Sulfolobus Solfataricus Bind to Common and Distinct RNA Targets
Source: Life (Basel). 2015 Apr 21;5(2):1264–81. doi: 10.3390/life5021264 (PMC4500138; doi:10.3390/life5021264)
Supplement: Supplementary file 1 [file life-05-01264-s001.zip]

Archive with 4 entries (4 files):
- life-05-01264-supplementary.pdf
- Supplementary Table S1_sso_noncoding.xls
- Supplementary Table S2_sso_coding.xls
- Supplementary Table S3_deepseq_sorted tohighFPKM.xls
