# Supplementary material for: The Heptameric SmAP1 and SmAP2 Proteins of the Crenarchaeon Sulfolobus Solfataricus Bind to Common and Distinct RNA Targets
Source: Life (Basel). 2015 Apr 21;5(2):1264–81. doi: 10.3390/life5021264 (PMC4500138; doi:10.3390/life5021264)
Supplement: Supplementary file 1 [file life-05-01264-s001.zip › Supplementary Table S1_sso_noncoding.xls]

## Sheet: SM1
ncrna_id	start	end	strand	FPKM1	FPKM2	binding	fc	Group	Homolog	Homolog group
4	110794	110866	-	75.7285	35.0575	SM1	2.16012		Sso-32	Other ncRNAs
7	371827	371883	+	466.744	97.0773	SM1	4.80796	C/D box	Sso-208	C/D box targets rRNA		FPKM: Fragment Per Kilobase of exon model per million mapped reads
13	452762	452999	-	4.71812	2.03434	SM1	2.31924	Tn-related				Fc = FPKM1/FPKM2
15	454246	454360	-	9.76445	2.40583	SM1	4.05867	Tn-related
16	455678	455754	+	6.73074	2.69484	SM1	2.49764	Tn-related
17	469166	469290	+	6.91023	1.10668	SM1	6.2441	Tn-related
19	476215	476339	-	8.29227	2.21336	SM1	3.74646
22	581783	581907	+	301.286	54.7807	SM1	5.49985
23	581770	581864	-	321.871	41.5005	SM1	7.75583
27	666126	666185	+	112.291	29.9726	SM1	3.74646		Sso-14	snoRNA SR4
33	871096	871220	+	2.76409	1.10668	SM1	2.49764
34	876487	876593	+	4494.07	625.74	SM1	7.18201
40	925587	925711	+	58.0459	13.2802	SM1	4.37087
44	1029782	1029939	-	614.486	186.052	SM1	3.30276	Tn-related
46	1220322	1220520	+	21.2689	10.4273	SM1	2.03974	Tn-related
65	1298945	1299069	-	1.38205	0.553341	SM1	2.49764	CRISPR
71	1401980	1402141	-	519.867	119.549	SM1	4.34857
72	1401976	1402183	-	423.168	113.062	SM1	3.74279	C/D box
77	1487430	1487698	+	212.573	76.3672	SM1	2.78357	Tn-related
85	1630593	1630681	-	11.6465	2.33149	SM1	4.99528		Sso-181	Other ncRNAs
87	1739251	1739311	+	65.1374	20.4101	SM1	3.19143	Tn-related
90	1908669	1908738	+	70.3363	30.6314	SM1	2.29622
95	1933637	1933881	-	53.5895	25.1262	SM1	2.13282		sR121	L7Ae associated
96	2003519	2003746	+	602.372	298.513	SM1	2.01791
101	2003541	2003673	+	870.923	423.326	SM1	2.05733	C/D box
114	2375000	2375188	-	30.1637	13.5407	SM1	2.22762
119	2640544	2640676	-	9.74186	2.60028	SM1	3.74646	Tn-related
122	2751936	2752004	+	16.2741	3.00729	SM1	5.41155		Sso-204	Other ncRNAs
sno RNAs
SSOs01	763524	763581	+	235.305	84.6707	SM1	2.77906	snoRNA
SSOs02	829350	829407	-	373.808	918.259	SM1	2.4565	snoRNA
tRNAs
SSOt28	590217	590292	-	9.09241	0	SM1	NA	tRNA
SSOt06	122559	122655	-	52.5391	0.713068	SM1	73.6804	tRNA
SSOt12	185144	185227	-	10.2831	0.823424	SM1	12.4882	tRNA
SSOt36	648224	648313	-	16.3158	3.07411	SM1	5.30749	tRNA
SSOt24	387197	387272	+	59.1006	11.8313	SM1	4.99528	tRNA
SSOt40	789937	790009	+	14.1991	2.8425	SM1	4.99528	tRNA
SSOt38	732937	733011	-	128.991	38.7338	SM1	3.33019	tRNA
SSOt22	341832	341916	-	17.2756	5.69615	SM1	3.03285	tRNA
SSOt43	913690	913775	-	176.773	59.5163	SM1	2.97017	tRNA
SSOt02	49344	49430	+	36.7354	13.5155	SM1	2.71802	tRNA
SSOt04	72731	72869	-	42.2568	18.9091	SM1	2.23473	tRNA
SSOt11	184778	184880	-	17.611	8.05836	SM1	2.18544	tRNA
rRNAs
SSOr03	871672	873167	+	67816.7	5210.5	SM1	13.0154	rRNA
SSOr04	873352	876400	+	54518.5	2840.39	SM1	19.194	rRNA
SSOr01	49815	50180	-	218.541	40.2533	SM1	5.42914	rRNA

## Sheet: SM2
ncrna_id	start	end	strand	FPKM1	FPKM2	binding	fc	Group	Homolog
5	163954	164000	+	5.51348	17.6598	SM2	3.20302	C/D Box	Sso-195	target rRNA
9	434657	434719	-	1033.79	2884.18	SM2	2.7899
11	442363	442434	+	3.59908	8.64595	SM2	2.40227	C/D Box
43	990534	990681	+	7846.38	16580.6	SM2	2.11315
51	1235705	1235829	+	13.8205	71.3809	SM2	5.16488	CRISPR
52	1243827	1243903	+	11.2179	37.7278	SM2	3.36317	Tn-related
53	1254808	1254932	-	1.38205	5.53341	SM2	4.00378	CRISPR
55	1257924	1258048	-	1.38205	6.64009	SM2	4.80454
59	1274774	1274864	-	7.59366	20.5222	SM2	2.70255	C/D box
63	1297551	1297675	-	6.21921	14.3869	SM2	2.31329	CRISPR
68	1311317	1311441	+	2.07307	4.98007	SM2	2.40227	CRISPR
73	1432573	1432732	-	57.2253	133.148	SM2	2.32672	Tn-related
76	1459864	1460028	+	0	1.25759	SM2	NA	Tn-related
79	1537239	1537403	+	0	6.70716	SM2	NA	Tn-related
88	1837336	1837452	+	32.484	95.7705	SM2	2.94824
92	1914151	1914363	+	125.714	322.133	SM2	2.56242
97	2007247	2007282	+	28.7926	71.0889	SM2	2.469
98	2016127	2016218	+	122.056	531.538	SM2	4.35488
99	2016089	2016238	-	94.4398	273.442	SM2	2.89542
100	2020290	2020454	-	4.18802	8.38395	SM2	2.00189
102	2047262	2047386	-	541.762	1092.85	SM2	2.01721
104	2078907	2079031	-	23.4948	66.4009	SM2	2.8262
105	2084169	2084206	+	361.423	851.853	SM2	2.35694
106	2111335	2111453	-	88.5555	181.928	SM2	2.0544	C/D box	Sso-67	target rRNA
107	2157326	2157450	-	1.38205	3.87338	SM2	2.80265
108	2189310	2189458	-	672.472	1524.94	SM2	2.26766		Sso-27	other nRNA
snoRNAs
SSOs04	2960304	2960360	-	1547.22	8093.82	Sm2	5.23119	snoRNAs
SSOs05	2720435	2720492	-	561.456	2709.46	Sm2	4.82578	snoRNAs
SSOs06	2934771	2934827	-	45.462	91.01	Sm2	2.00189	snoRNAs
tRNA
SSOt07	138351	138445	-	6.36468	24.7547	Sm2	3.88939	tRNA
SSOt37	664870	664954	+	3.04863	0.813736	Sm2	3.74646	tRNA
SSOt46	2538937	2539011	+	3.45511	11.989	Sm2	3.46994	tRNA
SSOt41	837019	837118	+	40.5976	134.877	Sm2	3.32229	tRNA
SSOt14	222725	222798	+	26.8472	88.7962	Sm2	3.30747	tRNA

## Sheet: BOTH
ncrna_id	start	end	strand	FPKM1	FPKM2	binding	fc	Group	Homolog
1	22533	22589	+	218.218	399.23	BOTH	1.8295	C/D box	Sso-195
2	31701	31901	+	37.8172	60.9088	BOTH	1.61061
3	49609	49695	-	40.7068	29.4161	BOTH	1.38383
6	224710	225039	-	64.3908	37.099	BOTH	1.73565	RNase P RNA
8	387343	387387	+	11.517	9.22234	BOTH	1.24882
10	441920	442044	-	23.4948	29.8804	BOTH	1.27179	Tn-related
12	442363	442434	-	13.1966	7.68529	BOTH	1.71713		Sso-97
14	453860	453972	+	4.58643	7.34523	BOTH	1.60151	Tn-related
18	469559	469746	+	26.6485	27.2255	BOTH	1.02165	Tn-related
20	484875	485117	-	17.4178	10.5317	BOTH	1.65384
21	573976	574016	+	139.047	143.396	BOTH	1.03128
24	590323	590395	-	26.0317	20.845	BOTH	1.24882	C/D box
25	595546	595581	+	14.3963	9.60661	BOTH	1.49858	H/ACA box
26	596577	596744	+	533.692	466.881	BOTH	1.1431
28	740357	740481	+	9.67432	8.30011	BOTH	1.16557
29	789543	789673	+	152.315	175.823	BOTH	1.15434
30	816020	816093	+	541.613	746.823	BOTH	1.37889	C/D box
31	829448	829550	-	88.8937	168.554	BOTH	1.89613
32	837806	837871	-	24.8664	17.8159	BOTH	1.39574	C/D box
35	885661	885825	-	13.0876	12.1567	BOTH	1.07657	C/D box
36	898531	898810	+	543.564	899.426	BOTH	1.65468
37	915783	915841	+	35.1368	45.7209	BOTH	1.30123
38	916458	916681	+	188.18	150.069	BOTH	1.25396
39	916675	916799	-	102.962	157.149	BOTH	1.52627
41	931952	932186	-	1.1027	1.17732	BOTH	1.06767	Tn-related
42	976747	976782	+	43.1889	80.6955	BOTH	1.86843
45	1184657	1184762	-	33.4103	18.2707	BOTH	1.82863	Tn-related
60	1275491	1275653	+	3994.58	3983.71	BOTH	1.00273
61	1275658	1275742	+	631.066	325.494	BOTH	1.93879
62	1296742	1296901	-	27.5329	27.667	BOTH	1.00487
64	1298627	1298751	-	17.2756	23.7936	BOTH	1.3773	CRISPR
69	1311732	1311856	+	14.5115	14.9402	BOTH	1.02954	CRISPR
70	1371669	1371789	-	12.1357	10.2894	BOTH	1.17944
74	1439093	1439161	-	32.5482	58.1409	BOTH	1.7863
75	1452094	1452238	+	54.2096	44.3627	BOTH	1.22196
78	1534755	1534956	+	14.5388	16.7783	BOTH	1.15403	Tn-related
80	1537989	1538093	+	11.517	11.1986	BOTH	1.02844
81	1560049	1560198	+	4.03097	5.07229	BOTH	1.25833	Tn-related
82	1576504	1576695	-	103.923	69.8881	BOTH	1.487	Tn-related
83	1577359	1577670	-	41.251	38.5742	BOTH	1.06939
84	1607467	1607629	+	50.8728	30.5525	BOTH	1.66509	Tn-related
86	1651273	1651383	+	7.00361	12.4626	BOTH	1.77946
89	1868399	1868831	-	45.483	44.0883	BOTH	1.03163
91	1913589	1913798	-	193.322	155.792	BOTH	1.2409
93	1923662	1923754	+	62.2292	52.8054	BOTH	1.17846
94	1929457	1929601	+	14.8927	10.4944	BOTH	1.41911
103	2069456	2069484	+	8.93564	11.9254	BOTH	1.33459
109	2189464	2189549	-	173.76	278.279	BOTH	1.60151
110	2191742	2192006	-	189.053	165.48	BOTH	1.14245
112	2302116	2302240	+	10.3653	9.96013	BOTH	1.04068
113	2369475	2369585	+	108.945	59.1975	BOTH	1.84037	C/D box
115	2397165	2397330	-	547.927	502.923	BOTH	1.08948
116	2450653	2450811	-	191.77	340.618	BOTH	1.77618
120	2646657	2646814	-	5.46695	4.37769	BOTH	1.24882	Tn-related
121	2682712	2682794	+	21.8546	16.6669	BOTH	1.31126
125	2966699	2966867	+	19.9334	21.2823	BOTH	1.06767	Tn-related
snoRNA
SSOs03	829584	829640	+	83.3471	156.537	BOTH	1.87814	snoRNA
rRNA
SSOr02	77945	78065	-	226.296	123.473	BOTH	1.83276	rRNA
tRNA
SSOt20	333447	333520	+	12.84	6.54288	BOTH	1.96243	tRNA
SSOt21	338925	339000	+	61.3737	33.6737	BOTH	1.8226	tRNA
SSOt32	640497	640570	+	4.66907	8.41227	BOTH	1.8017	tRNA
SSOt19	331724	331799	+	34.0965	19.1121	BOTH	1.78403	tRNA
SSOt27	485808	485882	-	1.1517	1.84447	BOTH	1.60151	tRNA
SSOt25	453232	453321	-	7.67803	12.2965	BOTH	1.60151	tRNA
SSOt26	466224	466315	+	43.1889	27.0656	BOTH	1.59571	tRNA
SSOt13	206337	206424	-	21.5945	33.7978	BOTH	1.56511	tRNA
SSOt10	184612	184684	-	5.91629	3.79	BOTH	1.56103	tRNA
SSOt35	646823	646897	+	66.7989	44.2672	BOTH	1.50899	tRNA
SSOt29	595385	595458	-	10.5054	7.47758	BOTH	1.40492	tRNA
SSOt42	898277	898373	-	9.79543	7.13068	BOTH	1.3737	tRNA
SSOt45	2135416	2135500	-	58.9402	43.128	BOTH	1.36663	tRNA
SSOt08	142457	142570	-	12.8809	17.5953	BOTH	1.366	tRNA
SSOt16	246930	247004	+	57.5852	76.5455	BOTH	1.32925	tRNA
SSOt09	179480	179553	-	56.0289	43.9308	BOTH	1.27539	tRNA
SSOt30	637164	637263	+	3.45511	2.7667	BOTH	1.24882	tRNA
SSOt03	49748	49832	-	5.08105	4.06868	BOTH	1.24882	tRNA
SSOt18	290891	290978	-	4.90783	3.92998	BOTH	1.24882	tRNA
SSOt31	639035	639119	+	7.11347	5.69615	BOTH	1.24882	tRNA
SSOt05	114659	114733	+	58.7369	47.9562	BOTH	1.2248	tRNA
SSOt17	248996	249085	-	11.517	13.8335	BOTH	1.20113	tRNA
SSOt15	227495	227569	-	18.4273	15.678	BOTH	1.17536	tRNA
SSOt44	915708	915781	+	37.3526	31.7797	BOTH	1.17536	tRNA
SSOt34	642464	642552	-	60.1733	69.1676	BOTH	1.14947	tRNA
SSOt39	789677	789766	-	214.025	238.244	BOTH	1.11316	tRNA
SSOt33	640931	641038	-	32.7916	29.4603	BOTH	1.11308	tRNA
SSOt01	48739	48814	+	76.1489	73.7181	BOTH	1.03297	tRNA
