# Supplementary material for: The Heptameric SmAP1 and SmAP2 Proteins of the Crenarchaeon Sulfolobus Solfataricus Bind to Common and Distinct RNA Targets
Source: Life (Basel). 2015 Apr 21;5(2):1264–81. doi: 10.3390/life5021264 (PMC4500138; doi:10.3390/life5021264)
Supplement: Supplementary file 1 [file life-05-01264-s001.zip › Supplementary Table S2_sso_coding.xls]

## Sheet: SM1
contig	start	end	strand	gene_id	FPKM1	FPKM2	binding	fc
NC_002754	1707093	1708058	-	SSO1892	1347.35	81.4831	SM1	16.5353
NC_002754	2629414	2630616	-	SSO2877	1444.01	108.437	SM1	13.3166
NC_002754	2902630	2903238	-	SSO3150	13186.6	1064.66	SM1	12.3858
NC_002754	1313283	1314542	+	SSO1457	2689.16	317.238	SM1	8.47681
NC_002754	1950201	1950713	+	SSO2125	19.8686	2.42693	SM1	8.18671
NC_002754	2236007	2237539	-	SSO2466	0.112691	0	SM1	NA
NC_002754	2864385	2865143	-	SSO3114	0.113805	0	SM1	NA
NC_002754	2542071	2542256	-	SSO11139	0.928794	0	SM1	NA
NC_002754	2249306	2250049	+	SSO2478	0.232199	0	SM1	NA
NC_002754	2568206	2568562	-	SSO2807	0.241955	0	SM1	NA
NC_002754	2836233	2836898	+	SSO3080	0.259393	0	SM1	NA
NC_002754	2868858	2869754	+	SSO3118	0.288889	0	SM1	NA
NC_002754	1262755	1263009	-	SSO7986	5.08105	0	SM1	NA
NC_002754	1740915	1741211	+	SSO9250	1.74501	0	SM1	NA

## Sheet: SM2
contig	start	end	strand	gene_id	FPKM1	FPKM2	binding	fc
NC_002754	2808423	2809529	+	SSO3054	0.62423	491.546	SM2	787.443
NC_002754	2789622	2792033	-	SSO3039	0.179059	132.829	SM2	741.82
NC_002754	2806121	2808286	-	SSO3053	27.1576	16046	SM2	590.848
NC_002754	2798255	2799235	-	SSO3047	1.84907	780.585	SM2	422.151
NC_002754	2777610	2778416	+	SSO3029	1.71257	618.994	SM2	361.441
NC_002754	2802789	2804870	-	SSO3051	0.539343	194.48	SM2	360.587
NC_002754	2799228	2800256	-	SSO3048	2.60225	628.356	SM2	241.467
NC_002754	2796467	2797270	-	SSO3045	0.644611	132.915	SM2	206.195
NC_002754	2792972	2794132	+	SSO3042	0.297598	55.7034	SM2	187.177
NC_002754	2785982	2787694	-	SSO3036	0.504249	91.9004	SM2	182.252
NC_002754	2800800	2801915	+	SSO3049	0.232199	36.1952	SM2	155.88
NC_002754	2797263	2798258	-	SSO3046	1.30087	193.128	SM2	148.46
NC_002754	2794177	2796309	-	SSO3043	3.19918	382.643	SM2	119.607
NC_002754	2805291	2805923	+	SSO3052	1.09166	129.047	SM2	118.212
NC_002754	2784953	2785861	+	SSO3035	0.665176	65.2869	SM2	98.1498
NC_002754	2802084	2802797	+	SSO3050	0.362932	34.8744	SM2	96.0907
NC_002754	2809610	2811463	-	SSO3055	1.77042	130.389	SM2	73.6485
NC_002754	2780329	2782593	-	SSO3032	0.266951	19.1776	SM2	71.8392
NC_002754	2787812	2788291	+	SSO3037	0.719815	45.103	SM2	62.6591
NC_002754	1579814	1580329	-	SSO1741	26.1142	798.108	SM2	30.5622
NC_002754	2788619	2789539	+	SSO3038	0.468935	12.2414	SM2	26.1046
NC_002754	2664169	2665023	+	SSO2914	24.8526	495.094	SM2	19.9212
NC_002754	1580326	1580877	-	SSO1742	27.6972	547.702	SM2	19.7746
NC_002754	2662646	2663866	+	SSO2912	20.7986	346.234	SM2	16.647
NC_002754	96568	97032	-	SSO0118	192.26	3001.43	SM2	15.6113
NC_002754	1648800	1649681	-	SSO1817	187.935	2571.75	SM2	13.6842
NC_002754	1723000	1724466	-	SSO1905	10.0686	118.768	SM2	11.7959
NC_002754	2016662	2017993	+	SSO2194	28.9872	339.866	SM2	11.7247
NC_002754	1765998	1767983	-	SSO1948	9.26409	97.169	SM2	10.4888
NC_002754	2663867	2664172	+	SSO2913	27.6635	280.965	SM2	10.1565
NC_002754	2276632	2277774	+	SSO2508	135.121	1369.55	SM2	10.1357
NC_002754	2102240	2103778	+	SSO2292	58.3149	574.958	SM2	9.85955
NC_002754	1388376	1389023	+	SSO1536	2.66598	25.9378	SM2	9.72918
NC_002754	778742	779071	+	SSO0915	199.978	1889.32	SM2	9.44766
NC_002754	710062	710967	+	SSO0829	61.2082	574.488	SM2	9.38581
NC_002754	1529268	1530953	+	SSO1676	12.1933	109.044	SM2	8.9429
NC_002754	2661826	2662545	-	SSO2911	31.312	276.286	SM2	8.82365
NC_002754	146365	146727	-	SSO0175	12.8496	113.374	SM2	8.82314
NC_002754	238363	238896	-	SSO0281	32.9983	289.753	SM2	8.78084
NC_002754	1902460	1903080	-	SSO2089	27.819	236.462	SM2	8.50002
NC_002754	2659249	2659944	-	SSO2908	19.857	165.466	SM2	8.33287
NC_002754	2247725	2249242	+	SSO2476	0.967341	7.97386	SM2	8.24308
NC_002754	96149	96562	-	SSO0117	63.2186	520.595	SM2	8.23484
NC_002754	2338953	2339186	+	SSO10674	0	0.295588	SM2	NA
NC_002754	2832735	2832917	+	SSO11909	0	0.377965	SM2	NA
NC_002754	2860119	2860394	+	SSO11972	0	0.501214	SM2	NA
NC_002754	2256156	2257112	-	SSO2485	0	0.361377	SM2	NA
NC_002754	2784328	2784903	-	SSO3034	0	12.4886	SM2	NA
NC_002754	2792118	2792975	+	SSO3041	0	52.8028	SM2	NA
NC_002754	2832250	2832648	+	SSO3077	0	0.173352	SM2	NA
NC_002754	2839433	2840662	-	SSO3085	0	0.112468	SM2	NA
NC_002754	2844180	2845145	+	SSO3090	0	0.143204	SM2	NA
NC_002754	1341626	1341778	+	SSO8195	0	0.452076	SM2	NA

## Sheet: BOTH
contig	start	end	strand	gene_id	FPKM1	FPKM2	binding	fc
NC_002754	1445389	1446273	+	SSO1599	3.70888	28.9957	BOTH	7.81791
NC_002754	1068850	1069980	+	SSO1233	10.3104	1.34543	BOTH	7.66321		FPKM: Fragment Per Kilobase of exon model per million mapped reads
NC_002754	2633493	2635001	-	SSO2881	687.474	90.2983	BOTH	7.61336		Fc = FPKM1/FPKM2
NC_002754	2659937	2661829	-	SSO2909	24.2752	184.337	BOTH	7.59363
NC_002754	2962883	2963272	-	SSO3215	57.8067	428.13	BOTH	7.40622
NC_002754	756108	757385	+	SSO0888	127.269	941.393	BOTH	7.39689
NC_002754	196577	196831	-	SSO5468	94.8463	699.271	BOTH	7.37267
NC_002754	1758106	1759269	+	SSO1939	5.34296	39.3376	BOTH	7.36251
NC_002754	1141772	1142557	-	SSO1312	6.59373	48.3997	BOTH	7.34026
NC_002754	1391826	1393118	+	SSO1539	11.1563	81.6316	BOTH	7.31709
NC_002754	2642979	2643782	+	SSO2890	135.798	993.295	BOTH	7.3145
NC_002754	1747084	1747380	-	SSO9270	0.290835	2.09599	BOTH	7.2068
NC_002754	319315	320832	+	SSO0376	7.45422	53.5388	BOTH	7.18235
NC_002754	1992148	1992753	+	SSO2166	11.9732	85.9459	BOTH	7.1782
NC_002754	1728731	1730149	-	SSO1909	49.5501	354.271	BOTH	7.14975
NC_002754	2937943	2939055	-	SSO3191	18.3155	128.578	BOTH	7.02019
NC_002754	2656137	2656970	-	SSO2905	5.69638	39.9745	BOTH	7.01753
NC_002754	2029637	2030356	+	SSO2205	157.04	1087.76	BOTH	6.92663
NC_002754	1407806	1408669	+	SSO1562	28.2927	195.575	BOTH	6.91253
NC_002754	1089847	1090317	-	SSO1265	2.93428	19.972	BOTH	6.80642
NC_002754	2422875	2423348	+	SSO2666	5.64918	38.0859	BOTH	6.74185
NC_002754	2399552	2400400	+	SSO2636	177.029	1192.71	BOTH	6.73739
NC_002754	2075955	2076548	+	SSO2262	13.3784	90.1274	BOTH	6.73679
NC_002754	1015610	1016533	-	SSO1174	17.9486	119.92	BOTH	6.68131
NC_002754	2172218	2174068	+	SSO2386	139.997	935.313	BOTH	6.68097
NC_002754	725327	725485	-	SSO6663	26.0763	3.91515	BOTH	6.66037
NC_002754	2812735	2813703	+	SSO3058	254.855	1694.93	BOTH	6.65056
NC_002754	748150	749340	-	SSO0878	137.146	911.723	BOTH	6.64784
NC_002754	2027648	2029624	+	SSO2204	64.27	414.446	BOTH	6.44851
NC_002754	2773247	2773726	+	SSO3025	1.61958	10.3751	BOTH	6.40605
NC_002754	2051220	2052134	+	SSO2233	38.1384	240.537	BOTH	6.30694
NC_002754	691118	691417	-	SSO0806	616.45	97.7568	BOTH	6.30595
NC_002754	1652213	1652527	+	SSO1819	1.09686	6.80697	BOTH	6.20586
NC_002754	1090286	1091146	-	SSO1266	6.11969	37.757	BOTH	6.16976
NC_002754	2382794	2383825	-	SSO2618	307.177	1872.22	BOTH	6.09491
NC_002754	2081153	2082034	-	SSO2272	31.9265	194.563	BOTH	6.0941
NC_002754	2134538	2135158	+	SSO2336	790.197	131.43	BOTH	6.01233
NC_002754	1266099	1266701	+	SSO1412	38.6767	231.476	BOTH	5.98491
NC_002754	2816852	2817589	+	SSO3061	7.13963	42.5502	BOTH	5.95972
NC_002754	206480	207904	-	SSO0240	116.201	679.153	BOTH	5.84464
NC_002754	2391484	2391870	+	SSO2626	41.2917	240.746	BOTH	5.83037
NC_002754	2157622	2158068	+	SSO2364	5378.23	31215	BOTH	5.80396
NC_002754	746826	748166	-	SSO0876	146.991	842.338	BOTH	5.73056
NC_002754	2087490	2088791	-	SSO2279	204.335	1163.05	BOTH	5.69187
NC_002754	2026797	2027651	+	SSO2203	16.6694	94.4077	BOTH	5.66353
NC_002754	2354060	2355367	+	SSO2586	48.7361	273.868	BOTH	5.6194
NC_002754	2838796	2839158	-	SSO3084	0.237956	1.33381	BOTH	5.60529
NC_002754	237076	238356	-	SSO0279	50.5051	282.286	BOTH	5.58925
NC_002754	2908209	2908952	-	SSO3157	260.643	47.8781	BOTH	5.44389
NC_002754	1648543	1648803	-	SSO8998	158.194	861.017	BOTH	5.44279
NC_002754	49815	50180	-	SSOr01	218.541	40.2533	BOTH	5.42914
NC_002754	2926180	2927595	-	SSO3180	218.873	1184.15	BOTH	5.41024
NC_002754	1096402	1099122	+	SSO1273	76.41	413.15	BOTH	5.40702
NC_002754	2390314	2391477	+	SSO2625	22.5592	121.935	BOTH	5.4051
NC_002754	173686	173949	-	SSO5410	341.258	1840.8	BOTH	5.39416
NC_002754	2392154	2393173	+	SSO2627	41.6646	223.099	BOTH	5.35465
NC_002754	2076545	2077186	+	SSO2263	20.7199	110.754	BOTH	5.34531
NC_002754	868399	870048	-	SSO1012	37.7445	201.718	BOTH	5.3443
NC_002754	2079512	2080072	+	SSO2268	50.1946	265.697	BOTH	5.29334
NC_002754	2462910	2463539	+	SSO2711	20.0177	105.508	BOTH	5.27073
NC_002754	98567	100018	-	SSO0120	31.1722	163.63	BOTH	5.24923
NC_002754	968854	969285	+	SSO1126	1689.97	8864.66	BOTH	5.24546
NC_002754	265543	267195	+	SSO0313	1160.22	221.562	BOTH	5.23655
NC_002754	2960304	2960360	-	SSOs04	1547.22	8093.82	BOTH	5.23119
NC_002754	1852563	1853435	-	SSO2038	35.0261	182.545	BOTH	5.2117
NC_002754	1843119	1843757	+	SSO2029	20.2765	105.429	BOTH	5.19957
NC_002754	2213911	2215062	+	SSO2438	26.3932	136.474	BOTH	5.17079
NC_002754	161092	162078	-	SSO0188	82.7022	426.498	BOTH	5.15704
NC_002754	1025670	1026743	-	SSO1183	16.2461	3.15569	BOTH	5.1482
NC_002754	1408758	1409189	+	SSO1563	20.5947	105.993	BOTH	5.14661
NC_002754	909262	911556	-	SSO1052	463.58	2375.57	BOTH	5.1244
NC_002754	108316	109137	-	SSO0128	25.6401	131.099	BOTH	5.11302
NC_002754	1774144	1775268	-	SSO1958	31.0192	158.194	BOTH	5.09986
NC_002754	2959531	2960316	+	SSO3213	619.811	3160.94	BOTH	5.09985
NC_002754	1866840	1868258	-	SSO2047	77.6122	395.118	BOTH	5.09092
NC_002754	76025	76711	-	SSO0094	57.711	293.484	BOTH	5.08541
NC_002754	2412368	2413027	-	SSO2653	43.8433	222.489	BOTH	5.07464
NC_002754	725084	725314	-	SSO6661	75.9078	14.9713	BOTH	5.07021
NC_002754	1009834	1011405	-	SSO1171	225.066	1134.8	BOTH	5.04206
NC_002754	1780812	1781108	+	SSO9368	2.03584	10.247	BOTH	5.03332
NC_002754	1509686	1510060	+	SSO1655	4.14614	20.8425	BOTH	5.02697
NC_002754	1832442	1833212	-	SSO2018	7.05811	35.3463	BOTH	5.0079
NC_002754	140783	142498	-	SSO0170	263.966	1320.75	BOTH	5.0035
NC_002754	1162424	1162912	+	SSO1330	3.00291	14.9934	BOTH	4.99295
NC_002754	2965911	2966117	-	SSO12210	71.3556	14.3681	BOTH	4.96624
NC_002754	1381827	1383182	+	SSO1531	455.841	91.9174	BOTH	4.95924
NC_002754	569617	570948	+	SSO0660	26.3932	130.806	BOTH	4.95603
NC_002754	6376	7431	+	SSO0010	29.1198	144.034	BOTH	4.94624
NC_002754	809864	810391	-	SSO0955	112.389	555.175	BOTH	4.93974
NC_002754	741301	742371	-	SSO0869	62.6663	308.768	BOTH	4.92717
NC_002754	1410329	1411699	-	SSO1565	22.7443	111.344	BOTH	4.89548
NC_002754	2415240	2416775	-	SSO2657	1251.3	6099.31	BOTH	4.87439
NC_002754	2277771	2278145	+	SSO2509	61.0404	296.037	BOTH	4.84986
NC_002754	1849776	1850858	+	SSO2036	141.57	686.503	BOTH	4.8492
NC_002754	2350288	2351055	-	SSO2581	62.7589	302.878	BOTH	4.82606
NC_002754	2720435	2720492	-	SSOs05	561.456	2709.46	BOTH	4.82578
NC_002754	132570	133430	+	SSO0159	69.022	332.904	BOTH	4.82316
NC_002754	2068737	2069294	-	SSO2253	1396.44	6729.09	BOTH	4.81874
NC_002754	649487	650488	-	SSO0764	63.2748	304.42	BOTH	4.81108
NC_002754	2604098	2604388	+	SSO11281	0.296831	1.42614	BOTH	4.80454
NC_002754	1537652	1537918	+	SSO8687	1.29405	6.21731	BOTH	4.80454
NC_002754	346650	348368	+	SSO0395	25.9787	124.655	BOTH	4.79834
NC_002754	1454687	1455124	-	SSO1608	10.8465	51.6388	BOTH	4.76086
NC_002754	2380930	2381904	-	SSO2616	200.308	953.165	BOTH	4.75849
NC_002754	1866419	1866721	-	SSO2046	45.327	214.351	BOTH	4.72899
NC_002754	1437748	1439055	-	SSO1593	13.2076	62.4518	BOTH	4.72846
NC_002754	2032422	2033480	+	SSO2209	9.38003	44.2829	BOTH	4.72098
NC_002754	1053475	1054089	+	SSO1214	90.5914	19.232	BOTH	4.71046
NC_002754	76708	77907	-	SSO0095	55.4258	261.05	BOTH	4.7099
NC_002754	2381905	2382801	-	SSO2617	221.771	1039.6	BOTH	4.68771
NC_002754	1928589	1928987	+	SSO2106	2.81432	13.1748	BOTH	4.68134
NC_002754	2143909	2144421	-	SSO2349	147.331	684.665	BOTH	4.64713
NC_002754	1953502	1954794	+	SSO2127	69.1424	14.9248	BOTH	4.63272
NC_002754	2035195	2035965	+	SSO2212	48.6226	224.458	BOTH	4.61634
NC_002754	2136182	2137171	+	SSO2338	30.4504	140.291	BOTH	4.60721
NC_002754	1124400	1124699	+	SSO1296	244.161	53.0285	BOTH	4.60435
NC_002754	806988	807533	-	SSO0951	327.16	1505.47	BOTH	4.60164
NC_002754	1269463	1269717	-	SSO8002	3.7261	0.813736	BOTH	4.57901
NC_002754	852456	852767	+	SSO0994	171.925	782.126	BOTH	4.54922
NC_002754	1753659	1754552	+	SSO1934	39.9039	181.043	BOTH	4.53697
NC_002754	132412	132582	+	SSO5317	271.257	1230.05	BOTH	4.53463
NC_002754	465344	466165	+	SSO0537	69.8799	316.808	BOTH	4.5336
NC_002754	853239	854066	-	SSO0996	41.1025	185.115	BOTH	4.50374
NC_002754	904866	905645	+	SSO1046	76.1897	341.759	BOTH	4.48563
NC_002754	610623	610868	-	SSO6401	576.555	2570.17	BOTH	4.4578
NC_002754	749413	750879	+	SSO0879	36.1527	159.364	BOTH	4.40807
NC_002754	2030357	2030998	+	SSO2206	117.189	514.232	BOTH	4.38807
NC_002754	2704945	2706603	-	SSO2962	53.7844	235.937	BOTH	4.38672
NC_002754	851273	852463	+	SSO0992	1013.33	4426.61	BOTH	4.36839
NC_002754	2416772	2417281	-	SSO2658	893.926	3891.02	BOTH	4.35273
NC_002754	2639601	2640188	+	SSO2886	76.6824	17.6448	BOTH	4.34589
NC_002754	2201886	2203055	+	SSO2423	99.6668	433.036	BOTH	4.34484
NC_002754	2391867	2392121	+	SSO10784	32.8575	142.404	BOTH	4.33399
NC_002754	2187140	2187886	+	SSO2402	17.4606	75.2788	BOTH	4.31135
NC_002754	2139054	2139866	+	SSO2343	114.427	491.32	BOTH	4.29375
NC_002754	856747	858180	+	SSO0999	2770.3	11889.6	BOTH	4.29183
NC_002754	736262	736633	+	SSO0860	2379.57	556.316	BOTH	4.27738
NC_002754	610870	611673	-	SSO0718	399.874	1701.57	BOTH	4.25528
NC_002754	1730726	1731223	-	SSO1912	16.3043	69.3065	BOTH	4.25082
NC_002754	905678	906418	+	SSO1047	225.095	956.678	BOTH	4.2501
NC_002754	2169053	2169472	+	SSO2381	99.5402	421.263	BOTH	4.23209
NC_002754	667951	668595	+	SSO0785	36.426	154.099	BOTH	4.23046
NC_002754	2016255	2016629	-	SSO2193	58.2763	246.237	BOTH	4.22533
NC_002754	1454484	1454690	-	SSO8472	16.6914	70.5041	BOTH	4.22399
NC_002754	243568	244716	-	SSO0286	175.161	739.593	BOTH	4.22235
NC_002754	40264	41331	+	SSO0045	12688.1	3014.62	BOTH	4.20885
NC_002754	20199	21008	-	SSO0020	8.74443	36.7186	BOTH	4.19909
NC_002754	859006	859809	+	SSO1001	184.144	770.135	BOTH	4.18224
NC_002754	1159034	1160713	-	SSO1328	15.1675	63.4036	BOTH	4.18022
NC_002754	1871635	1873161	-	SSO2053	124.278	29.8503	BOTH	4.16337
NC_002754	397123	397767	-	SSO0463	251.768	60.4814	BOTH	4.16273
NC_002754	41328	41528	+	SSO5098	13710	3294.23	BOTH	4.16182
NC_002754	1850848	1852560	+	SSO2037	25.3637	105.508	BOTH	4.15979
NC_002754	854063	855526	-	SSO0997	28.3206	117.642	BOTH	4.15392
NC_002754	102132	103238	-	SSO0122	5.54004	22.8684	BOTH	4.12784
NC_002754	907818	908105	+	SSO7111	346.711	1430.18	BOTH	4.125
NC_002754	611680	612735	-	SSO0719	713.354	2940.15	BOTH	4.12158
NC_002754	1635126	1635656	-	SSO1805	139.734	574.833	BOTH	4.11378
NC_002754	2052124	2052840	+	SSO2234	27.2265	111.999	BOTH	4.11362
NC_002754	2308155	2308748	-	SSO2539	98.4475	404.06	BOTH	4.10432
NC_002754	455268	455459	+	SSO6050	3.59908	14.7702	BOTH	4.10387
NC_002754	97075	98595	-	SSO0119	16.2988	66.7574	BOTH	4.09585
NC_002754	2215007	2215795	+	SSO2439	14.5605	59.2614	BOTH	4.07001
NC_002754	1227573	1227869	-	SSO7898	3.78085	0.93155	BOTH	4.05867
NC_002754	1831629	1832441	-	SSO2017	8.8184	35.6473	BOTH	4.04237
NC_002754	215580	216095	-	SSO0249	131.91	533.1	BOTH	4.04138
NC_002754	172438	173670	-	SSO0199	210.445	849.813	BOTH	4.03817
NC_002754	2049579	2050109	+	SSO2230	21.7978	87.9249	BOTH	4.03366
NC_002754	162109	163914	-	SSO0189	71.0728	285.096	BOTH	4.01132
NC_002754	2946137	2947924	-	SSO3202	78.5034	314.736	BOTH	4.0092
NC_002754	329319	330797	-	SSO0386	96.832	388.021	BOTH	4.00716
NC_002754	1789208	1789606	-	SSO1977	3.46377	0.866762	BOTH	3.99622
NC_002754	1775885	1776751	+	SSO1960	381.178	1522.88	BOTH	3.9952
NC_002754	2620566	2621144	+	SSO2864	624.337	2491.23	BOTH	3.99019
NC_002754	811637	813073	-	SSO0957	103.629	412.166	BOTH	3.9773
NC_002754	2071570	2073105	+	SSO2256	35.4847	140.181	BOTH	3.95048
NC_002754	2161170	2162300	+	SSO2368	156.717	615.598	BOTH	3.92807
NC_002754	1897233	1898183	-	SSO2085	34.424	135.135	BOTH	3.92561
NC_002754	954677	954997	+	SSO1102	486.245	123.898	BOTH	3.92455
NC_002754	878058	878894	+	SSO1019	121.775	476.405	BOTH	3.91217
NC_002754	804848	805915	+	SSO0949	221.687	866.279	BOTH	3.90767
NC_002754	2025868	2026740	-	SSO2202	49.8676	194.351	BOTH	3.89733
NC_002754	448668	448982	-	SSO0520	367.723	1427.27	BOTH	3.88137
NC_002754	955002	956138	+	SSO1103	259.437	66.9776	BOTH	3.8735
NC_002754	1446518	1448023	+	SSO1600	10.955	42.3456	BOTH	3.86543
NC_002754	32275	34002	+	SSO0037	35.8408	138.415	BOTH	3.86194
NC_002754	95902	96168	+	SSO5209	57.9088	223.564	BOTH	3.86063
NC_002754	2169430	2169765	+	SSO2382	110.029	424.681	BOTH	3.85972
NC_002754	2454827	2455870	-	SSO2702	14.9755	3.9089	BOTH	3.83113
NC_002754	579263	579772	-	SSO0675	27.4377	7.188	BOTH	3.81715
NC_002754	1370921	1371163	-	SSO8278	82.4677	21.6327	BOTH	3.81219
NC_002754	760984	761571	+	SSO0894	35.9908	137.159	BOTH	3.81094
NC_002754	2388719	2389468	-	SSO2623	55.0515	209.347	BOTH	3.80275
NC_002754	1	252	+	SSO12256	65.1262	247.302	BOTH	3.79727
NC_002754	2212210	2212797	-	SSO2436	105.475	400.301	BOTH	3.79523
NC_002754	1989946	1990365	-	SSO2163	136.971	518.922	BOTH	3.78856
NC_002754	422610	423494	+	SSO0490	175.489	46.5025	BOTH	3.77375
NC_002754	1449666	1450007	+	SSO1602	124.515	469.005	BOTH	3.76664
NC_002754	2389452	2390252	-	SSO2624	26.9594	101.29	BOTH	3.75715
NC_002754	1541979	1542281	+	SSO1690	35.0643	9.35931	BOTH	3.74646
NC_002754	1227357	1227509	-	SSO7896	1.69368	0.452076	BOTH	3.74646
NC_002754	439598	439738	+	SSO5983	5.51348	1.47165	BOTH	3.74646
NC_002754	1834088	1834954	+	SSO2020	3.98514	14.9185	BOTH	3.74353
NC_002754	2200206	2201762	-	SSO2422	132.257	494.835	BOTH	3.74145
NC_002754	1087960	1088496	-	SSO1262	4.82558	18.0325	BOTH	3.73686
NC_002754	530647	531255	-	SSO0607	60.2801	225.107	BOTH	3.73435
NC_002754	1315750	1317435	-	SSO1459	3.68873	13.7433	BOTH	3.72574
NC_002754	1731989	1732768	-	SSO1913	32.6685	121.664	BOTH	3.72419
NC_002754	521496	522194	+	SSO0594	38.5549	143.184	BOTH	3.71376
NC_002754	2505750	2506250	-	SSO2751	29.8271	110.585	BOTH	3.70755
NC_002754	629156	629716	-	SSO0740	826.825	223.284	BOTH	3.70302
NC_002754	2703907	2704938	-	SSO2960	74.3251	275.196	BOTH	3.70259
NC_002754	179604	180845	-	SSO0210	67.6696	250.496	BOTH	3.70175
NC_002754	421390	422607	+	SSO0489	736.836	199.155	BOTH	3.69981
NC_002754	429334	430944	+	SSO0497	23.7526	87.7582	BOTH	3.69468
NC_002754	2320573	2324499	+	SSO2551	220.861	813.032	BOTH	3.6812
NC_002754	1611934	1613340	+	SSO1780	76.3096	280.603	BOTH	3.67716
NC_002754	2599192	2599902	+	SSO2838	2.06529	7.588	BOTH	3.67406
NC_002754	1511957	1512196	+	SSO8620	17.2756	63.4036	BOTH	3.67013
NC_002754	2655484	2656164	-	SSO2904	3.17099	11.5787	BOTH	3.65145
NC_002754	735325	735717	+	SSO0858	1069.5	293.038	BOTH	3.6497
NC_002754	772004	774010	+	SSO0907	130.449	35.8417	BOTH	3.63959
NC_002754	2945488	2946087	-	SSO3201	187.584	682.569	BOTH	3.63874
NC_002754	849392	851026	+	SSO0991	25.8869	94.0002	BOTH	3.63118
NC_002754	2018018	2018821	+	SSO2195	336.165	1220.24	BOTH	3.62989
NC_002754	828181	829350	+	SSO0969	142.634	514.737	BOTH	3.60879
NC_002754	238786	239298	+	SSO0280	21.0472	75.9091	BOTH	3.6066
NC_002754	1889747	1890490	-	SSO2072	10.9133	39.3251	BOTH	3.6034
NC_002754	2867348	2868784	-	SSO3117	0.12022	0.4332	BOTH	3.6034
NC_002754	2960332	2962644	-	SSO3214	63.2989	227.837	BOTH	3.59939
NC_002754	300252	300518	-	SSO5671	358.775	99.736	BOTH	3.59725
NC_002754	906384	907376	+	SSO1048	158.49	569.222	BOTH	3.59154
NC_002754	1512757	1513338	+	SSO1658	18.9972	68.2168	BOTH	3.59089
NC_002754	2128886	2129068	+	SSO10224	10.8562	3.02372	BOTH	3.59036
NC_002754	1687602	1688417	+	SSO1873	3.0698	11.0193	BOTH	3.5896
NC_002754	807634	808389	-	SSO0952	92.0907	330.376	BOTH	3.58751
NC_002754	433904	434368	+	SSO0502	33.8081	121.08	BOTH	3.5814
NC_002754	1691385	1692494	+	SSO1878	6.84797	24.4891	BOTH	3.5761
NC_002754	859806	860780	+	SSO1003	164.517	588.031	BOTH	3.57429
NC_002754	174056	174355	+	SSO0200	372.864	104.443	BOTH	3.57003
NC_002754	365906	369634	+	SSO0420	75.8615	270.698	BOTH	3.56831
NC_002754	268425	270347	-	SSO0315	62.1669	221.638	BOTH	3.56522
NC_002754	2427250	2428122	-	SSO2671	35.9166	128.035	BOTH	3.5648
NC_002754	2009008	2009310	+	SSO2183	35.3494	126.008	BOTH	3.56466
NC_002754	412196	413338	+	SSO0478	14.5852	51.6185	BOTH	3.53909
NC_002754	985130	985957	-	SSO1144	100.461	355.361	BOTH	3.5373
NC_002754	1515235	1516986	-	SSO1662	147.71	41.769	BOTH	3.53636
NC_002754	355009	355788	+	SSO0405	29.2356	103.131	BOTH	3.52757
NC_002754	759718	760983	+	SSO0893	43.2572	152.486	BOTH	3.52509
NC_002754	1291579	1292313	-	SSO1439	54.4122	191.787	BOTH	3.52471
NC_002754	2962648	2962899	-	SSO12199	40.104	141.354	BOTH	3.52469
NC_002754	143428	143940	+	SSO0172	271.257	956.077	BOTH	3.52462
NC_002754	1998933	1999832	+	SSO2175	38.2942	134.954	BOTH	3.52413
NC_002754	1450617	1450820	+	SSO8462	2.1171	7.45925	BOTH	3.52333
NC_002754	969608	970450	+	SSO1127	522.571	1837.17	BOTH	3.51563
NC_002754	2400659	2400844	-	SSO10802	184.83	649.655	BOTH	3.51488
NC_002754	742365	742985	-	SSO0870	51.0478	178.989	BOTH	3.50631
NC_002754	423491	424309	+	SSO0491	50.308	14.3571	BOTH	3.50404
NC_002754	1958425	1958892	-	SSO2131	29.3463	8.42426	BOTH	3.48355
NC_002754	195129	196571	-	SSO3254	114.751	398.708	BOTH	3.47454
NC_002754	156923	158560	+	SSO0185	35.9117	124.654	BOTH	3.47112
NC_002754	1598378	1598818	-	SSO1764	22.5248	78.1076	BOTH	3.46762
NC_002754	758096	759133	+	SSO0890	45.935	159.259	BOTH	3.46704
NC_002754	1927493	1928602	+	SSO2105	5.13598	17.7592	BOTH	3.45781
NC_002754	803980	804876	+	SSO0947	140.111	484.404	BOTH	3.45728
NC_002754	771711	771998	+	SSO6768	524.566	152.025	BOTH	3.45053
NC_002754	2283385	2284317	-	SSO2515	9.99872	34.4726	BOTH	3.4477
NC_002754	2400401	2400892	+	SSO2637	168.893	582.16	BOTH	3.44691
NC_002754	2726051	2727280	-	SSO2983	80.9705	279.088	BOTH	3.44679
NC_002754	2764032	2765183	+	SSO3017	17.2456	59.4409	BOTH	3.44673
NC_002754	231686	232867	+	SSO0271	82.9432	285.858	BOTH	3.44643
NC_002754	969297	969539	+	SSO7239	2303.05	7921.25	BOTH	3.43946
NC_002754	594271	595011	-	SSO0688	88.9424	305.793	BOTH	3.43811
NC_002754	703579	704502	+	SSO0821	15.4246	4.4914	BOTH	3.43426
NC_002754	1119607	1120947	-	SSO1291	63.3824	216.942	BOTH	3.42274
NC_002754	372723	373058	+	SSO0428	243.195	831.452	BOTH	3.41887
NC_002754	813066	813359	-	SSO6855	87.5531	299.256	BOTH	3.41799
NC_002754	169763	170626	+	SSO0197	84.6783	288.919	BOTH	3.41196
NC_002754	139591	140172	-	SSO0168	240.878	70.7126	BOTH	3.40645
NC_002754	2779296	2779475	-	SSO11766	3.83902	13.065	BOTH	3.40321
NC_002754	1765074	1765526	+	SSO1947	0.762718	2.59569	BOTH	3.40321
NC_002754	953584	953883	+	SSO1100	693.038	204.044	BOTH	3.39651
NC_002754	574064	574576	+	SSO0665	1653.98	5616.06	BOTH	3.39549
NC_002754	2957760	2959016	+	SSO3211	163.548	554.661	BOTH	3.39144
NC_002754	1638041	1638670	-	SSO1807	31496.7	9304.58	BOTH	3.38507
NC_002754	655295	655744	-	SSO0770	253.567	75.0084	BOTH	3.38051
NC_002754	1018989	1020059	+	SSO1177	34.2769	115.796	BOTH	3.37825
NC_002754	2073102	2073911	+	SSO2257	14.183	47.8196	BOTH	3.3716
NC_002754	1778571	1778996	-	SSO1963	3.85253	12.9892	BOTH	3.3716
NC_002754	57232	57591	-	SSO0070	296.324	998.895	BOTH	3.37096
NC_002754	2213038	2213865	-	SSO2437	6.25927	21.051	BOTH	3.36317
NC_002754	2393230	2393592	+	SSO2628	10.708	36.0129	BOTH	3.36317
NC_002754	2500050	2501321	-	SSO2746	52.8996	177.813	BOTH	3.36132
NC_002754	2080157	2080678	-	SSO2269	17.0439	57.2421	BOTH	3.35851
NC_002754	768014	768232	-	SSO6759	238.624	800.954	BOTH	3.35656
NC_002754	189049	189375	-	SSO0221	350.002	1173.31	BOTH	3.3523
NC_002754	2985474	2985797	-	SSO3242	184.219	616.958	BOTH	3.34904
NC_002754	2211482	2212210	-	SSO2435	88.6291	294.792	BOTH	3.32613
NC_002754	2949984	2951066	-	SSO3204	57.4257	190.706	BOTH	3.32091
NC_002754	564264	565319	+	SSO0653	121.223	400.465	BOTH	3.30352
NC_002754	12647	13030	-	SSO0014	1862.97	565.229	BOTH	3.29596
NC_002754	1708042	1709634	-	SSO1893	439.969	133.559	BOTH	3.29419
NC_002754	93241	94617	-	SSO0114	124.078	408.727	BOTH	3.29411
NC_002754	1458558	1459364	-	SSO1611	20.7649	68.3962	BOTH	3.29383
NC_002754	145235	146368	-	SSO0174	32.2965	106.313	BOTH	3.29179
NC_002754	1779283	1779681	+	SSO1964	33.9883	111.639	BOTH	3.28463
NC_002754	2137263	2138336	+	SSO2339	466.473	1531.86	BOTH	3.28393
NC_002754	1247084	1248040	+	SSO1399	470.701	1545.47	BOTH	3.28333
NC_002754	2572959	2573759	-	SSO2812	143.855	470.961	BOTH	3.27385
NC_002754	1983028	1983879	+	SSO2156	112.433	367.27	BOTH	3.26656
NC_002754	780980	782347	-	SSO0918	45.2095	147.284	BOTH	3.25782
NC_002754	1986061	1986828	-	SSO2161	77.6051	252.624	BOTH	3.25525
NC_002754	2935330	2936877	+	SSO3189	407.393	1321.06	BOTH	3.24273
NC_002754	577462	577875	+	SSO0671	509.713	1645.49	BOTH	3.22826
NC_002754	2160251	2161186	+	SSO2367	144.701	465.773	BOTH	3.21885
NC_002754	2103749	2104255	-	SSO2294	29.8148	95.4976	BOTH	3.20302
NC_002754	2120772	2121260	-	SSO2319	0.529926	1.69736	BOTH	3.20302
NC_002754	406229	406510	+	SSO5909	159.585	510.417	BOTH	3.19841
NC_002754	274562	275344	+	SSO0321	15.334	49.0268	BOTH	3.19726
NC_002754	837100	837783	-	SSO0978	42.0524	134.29	BOTH	3.1934
NC_002754	2975459	2976436	+	SSO3231	512.615	1633.92	BOTH	3.18743
NC_002754	2985858	2986814	+	SSO3243	15.6148	49.7255	BOTH	3.18451
NC_002754	399141	401654	+	SSO0466	17.5573	55.7963	BOTH	3.17795
NC_002754	1870810	1871598	-	SSO2052	13.6847	43.4818	BOTH	3.1774
NC_002754	2423999	2425000	-	SSO2668	123.705	392.985	BOTH	3.1768
NC_002754	1276502	1277293	+	SSO1422	8.28878	26.2872	BOTH	3.17141
NC_002754	2490548	2491108	-	SSO2736	63.2822	200.475	BOTH	3.16795
NC_002754	358247	358633	-	SSO0410	181.237	573.358	BOTH	3.16358
NC_002754	777138	778397	-	SSO0913	43.4631	137.292	BOTH	3.15882
NC_002754	1140958	1141761	-	SSO1311	11.8179	37.2507	BOTH	3.15207
NC_002754	2610021	2611082	+	SSO2850	629.371	200.143	BOTH	3.1446
NC_002754	1815967	1816932	+	SSO1997	6.97461	2.21966	BOTH	3.14219
NC_002754	1069977	1070438	+	SSO1234	14.5833	4.64111	BOTH	3.14219
NC_002754	2093422	2094543	+	SSO2284	183.765	577.136	BOTH	3.14063
NC_002754	815475	815990	-	SSO0960	188.324	591.41	BOTH	3.14039
NC_002754	1968238	1968660	+	SSO2140	163.567	513.116	BOTH	3.13704
NC_002754	1404715	1405452	+	SSO1556	81.6961	256.239	BOTH	3.13649
NC_002754	1614044	1614982	-	SSO1781	2.02376	6.33484	BOTH	3.13023
NC_002754	1279025	1279870	+	SSO1426	103.02	322.455	BOTH	3.13001
NC_002754	2720217	2721179	-	SSO2977	234.467	733.406	BOTH	3.12797
NC_002754	2133042	2134058	-	SSO2334	72.8734	23.3279	BOTH	3.12387
NC_002754	1684621	1685151	+	SSO1869	4.8801	15.2403	BOTH	3.12295
NC_002754	708093	708392	-	SSO0826	2.87926	0.922234	BOTH	3.12205
NC_002754	1535273	1535605	+	SSO1681	2.59393	0.830842	BOTH	3.12205
NC_002754	1974673	1975056	+	SSO2148	115.845	361.509	BOTH	3.12062
NC_002754	1823352	1825286	+	SSO2008	147.713	460.116	BOTH	3.11494
NC_002754	2146176	2146559	+	SSO2352	52.6365	163.733	BOTH	3.11063
NC_002754	2896247	2897035	-	SSO3146	2.84642	8.85415	BOTH	3.11063
NC_002754	846234	847502	+	SSO0989	86.5821	269.04	BOTH	3.10734
NC_002754	2306712	2308109	-	SSO2538	83.7828	260.046	BOTH	3.10381
NC_002754	2675835	2676362	+	SSO2931	79.5069	25.6758	BOTH	3.09656
NC_002754	2326298	2327317	-	SSO2553	148.536	48.0104	BOTH	3.09383
NC_002754	2147932	2149548	-	SSO2354	2466.87	798.314	BOTH	3.0901
NC_002754	1990873	1991295	-	SSO2165	33.0809	102.198	BOTH	3.08934
NC_002754	1036421	1037674	-	SSO1193	20.9401	64.5895	BOTH	3.08449
NC_002754	2715783	2716376	+	SSO2972	23.1213	71.0307	BOTH	3.07208
NC_002754	47249	47788	+	SSO0054	812.752	264.63	BOTH	3.07128
NC_002754	1346285	1347400	-	SSO1491	111.765	342.987	BOTH	3.06882
NC_002754	2908988	2909233	+	SSO12093	100.072	32.6156	BOTH	3.06822
NC_002754	1873107	1874057	-	SSO2054	20.5272	6.69129	BOTH	3.06775
NC_002754	577067	577486	+	SSO0670	672.308	2060.86	BOTH	3.06536
NC_002754	1450055	1450573	+	SSO1603	85.0464	260.545	BOTH	3.06356
NC_002754	1409604	1410179	-	SSO1564	10.0474	30.7411	BOTH	3.0596
NC_002754	25702	26757	-	SSO0028	204.493	625.128	BOTH	3.05697
NC_002754	389010	389447	-	SSO0449	64.882	198.186	BOTH	3.05456
NC_002754	2879784	2881247	+	SSO3129	39.8259	121.61	BOTH	3.05355
NC_002754	1277873	1278292	+	SSO1424	70.1306	214.09	BOTH	3.05274
NC_002754	616781	617791	-	SSO0723	59.9775	183.079	BOTH	3.05245
NC_002754	1622939	1624333	+	SSO1789	8.8545	27.0225	BOTH	3.05183
NC_002754	5351	6334	-	SSO0009	156.165	476.371	BOTH	3.05043
NC_002754	427181	429337	+	SSO0496	35.2399	107.487	BOTH	3.05015
NC_002754	1685257	1685937	+	SSO1870	550.611	1677.09	BOTH	3.04586
NC_002754	627926	628651	-	SSO0738	866.515	2637.32	BOTH	3.0436
NC_002754	2174074	2174925	+	SSO2387	110.304	335.609	BOTH	3.04258
NC_002754	1101531	1102481	+	SSO1276	85.7421	260.524	BOTH	3.03846
NC_002754	705741	708023	-	SSO0825	92.6963	30.5089	BOTH	3.03834
NC_002754	300522	300683	-	SSO5672	334.314	110.156	BOTH	3.03492
NC_002754	1915474	1918680	-	SSO2098	70.6214	214.253	BOTH	3.03383
NC_002754	2762961	2763821	-	SSO3016	51.5659	156.25	BOTH	3.0301
NC_002754	1516989	1519040	-	SSO1663	40.537	13.3818	BOTH	3.02925
NC_002754	970658	971971	+	SSO1129	401.716	1213.85	BOTH	3.02167
NC_002754	2754394	2755527	+	SSO3010	44.6362	134.736	BOTH	3.01855
NC_002754	478181	479362	+	SSO0548	11.0347	33.2964	BOTH	3.01742
NC_002754	100015	102102	-	SSO0121	9.92849	29.913	BOTH	3.01284
NC_002754	2222038	2223468	+	SSO2450	31.2071	94.0118	BOTH	3.01251
NC_002754	1928975	1929295	+	SSO2107	11.0327	33.1832	BOTH	3.00772
NC_002754	1433920	1434831	-	SSO1587	4.26207	12.8172	BOTH	3.00728
NC_002754	728964	729368	+	SSO0849	88.2974	29.3749	BOTH	3.00588
NC_002754	1279842	1280669	+	SSO1427	117.883	354.275	BOTH	3.00531
NC_002754	732720	733019	+	SSO0853	140.508	46.8034	BOTH	3.00209
NC_002754	15589	17808	+	SSO0017	30.349	91.0083	BOTH	2.99873
NC_002754	1910950	1913148	+	SSO2095	18.9332	56.7747	BOTH	2.99868
NC_002754	1940928	1941752	+	SSO2117	15.391	46.1117	BOTH	2.99603
NC_002754	214339	215556	-	SSO0248	84.3922	252.649	BOTH	2.99375
NC_002754	2890425	2890988	-	SSO3141	66.9275	200.267	BOTH	2.9923
NC_002754	153826	155106	+	SSO0182	53.2697	159.339	BOTH	2.99118
NC_002754	990748	991818	+	SSO1150	67.0215	200.463	BOTH	2.99103
NC_002754	1456112	1456303	+	SSO8481	6.74827	20.1739	BOTH	2.98949
NC_002754	595591	596142	+	SSO0689	31.9223	95.1054	BOTH	2.97928
NC_002754	2481492	2482814	+	SSO2727	52.8191	157.156	BOTH	2.97537
NC_002754	2189569	2189883	-	SSO2405	194.419	578.373	BOTH	2.97488
NC_002754	567579	568523	-	SSO0657	80.2537	238.097	BOTH	2.96681
NC_002754	727179	727760	+	SSO0846	2.8199	0.950757	BOTH	2.96595
NC_002754	539379	539696	-	SSO0620	121.146	40.8915	BOTH	2.96263
NC_002754	2453677	2454852	+	SSO2701	47.5225	16.0568	BOTH	2.95966
NC_002754	30202	30864	+	SSO0034	40.2576	118.931	BOTH	2.95424
NC_002754	205329	206300	-	SSO0237	27.8151	82.0475	BOTH	2.94975
NC_002754	2012683	2013399	-	SSO2190	244.918	721.002	BOTH	2.94385
NC_002754	975477	976139	+	SSO1136	11.5952	34.1143	BOTH	2.9421
NC_002754	2489890	2490564	+	SSO2735	72.5574	213.446	BOTH	2.94175
NC_002754	2043206	2044204	+	SSO2222	835.591	2456.45	BOTH	2.93978
NC_002754	57588	58385	-	SSO0071	318.559	936.189	BOTH	2.93883
NC_002754	1277305	1277907	+	SSO1423	10.7435	31.5441	BOTH	2.9361
NC_002754	2011770	2012114	+	SSO2187	134.449	394.556	BOTH	2.93461
NC_002754	47785	48516	+	SSO0055	2218.8	757.253	BOTH	2.93007
NC_002754	355785	356777	+	SSO0406	187.63	549.719	BOTH	2.92979
NC_002754	2879278	2879523	-	SSO12018	14.3963	42.1754	BOTH	2.92959
NC_002754	502286	502573	+	SSO6179	837.685	2453.29	BOTH	2.92865
NC_002754	305563	306456	+	SSO0360	507.446	1483.93	BOTH	2.92431
NC_002754	1673441	1673848	-	SSO1853	2.96395	1.01717	BOTH	2.91391
NC_002754	2123734	2124657	-	SSO2323	54.5003	18.7142	BOTH	2.91225
NC_002754	1041723	1041878	-	SSO7399	74.7501	25.7162	BOTH	2.90674
NC_002754	699834	700166	+	SSO0816	791.667	273.139	BOTH	2.8984
NC_002754	38481	40262	+	SSO0044	10953.9	3794.67	BOTH	2.88665
NC_002754	1430039	1430932	+	SSO1583	434.208	1253.06	BOTH	2.88586
NC_002754	1299449	1300162	+	SSO1445	18.9935	6.58739	BOTH	2.88331
NC_002754	270412	271047	+	SSO0316	1141.11	3289.48	BOTH	2.8827
NC_002754	2583325	2583681	-	SSO2822	49.1168	17.0497	BOTH	2.8808
NC_002754	1975089	1977278	+	SSO2150	101.642	292.746	BOTH	2.88017
NC_002754	1100189	1101541	+	SSO1275	164.456	473.642	BOTH	2.88005
NC_002754	2150698	2152398	+	SSO2356	314.434	904.993	BOTH	2.87817
NC_002754	1352555	1355674	-	SSO1500	56.4501	162.411	BOTH	2.87707
NC_002754	2328680	2329435	-	SSO2555	27.7643	79.8721	BOTH	2.87679
NC_002754	2714884	2715642	-	SSO2971	38.1246	109.629	BOTH	2.87555
NC_002754	1243384	1243728	+	SSO1395	15.2726	43.9064	BOTH	2.87484
NC_002754	1819156	1819875	+	SSO2001	6.83825	19.5975	BOTH	2.86586
NC_002754	2158065	2158346	+	SSO10285	6774.23	19411.8	BOTH	2.86554
NC_002754	2185709	2186512	-	SSO2400	42.1146	120.441	BOTH	2.85984
NC_002754	500453	500761	+	SSO0567	20294	7096.95	BOTH	2.85954
NC_002754	1139614	1140414	+	SSO1309	9.38186	3.28136	BOTH	2.85914
NC_002754	908102	908302	+	SSO7114	377.742	1079.84	BOTH	2.85867
NC_002754	2574051	2574533	-	SSO2813	253.053	723.181	BOTH	2.85782
NC_002754	1124576	1126654	-	SSO1297	277.29	97.0475	BOTH	2.85726
NC_002754	1634878	1635063	+	SSO8958	148.607	423.93	BOTH	2.85269
NC_002754	810524	811621	-	SSO0956	128.151	364.484	BOTH	2.84418
NC_002754	1371861	1372685	-	SSO1519	4.39742	12.4921	BOTH	2.84078
NC_002754	1720018	1721391	+	SSO1903	41.4915	117.847	BOTH	2.84026
NC_002754	1206340	1206729	-	SSO1371	4.8726	13.8335	BOTH	2.83904
NC_002754	1948939	1949301	+	SSO2124	2.61751	7.43123	BOTH	2.83904
NC_002754	2189109	2189342	+	SSO10340	847.906	2403.72	BOTH	2.83489
NC_002754	2657101	2657556	+	SSO2906	54.7439	155.172	BOTH	2.83451
NC_002754	884757	885719	-	SSO1026	11.2121	31.7467	BOTH	2.83147
NC_002754	143942	145231	+	SSO0173	236.568	669.531	BOTH	2.83018
NC_002754	1617122	1617568	+	SSO1784	28.2129	79.8445	BOTH	2.83007
NC_002754	22052	22492	-	SSO0022	73.6464	208.287	BOTH	2.8282
NC_002754	2529509	2530423	-	SSO2773	49.5611	140.074	BOTH	2.82629
NC_002754	989495	989941	-	SSO1149	151.113	426.611	BOTH	2.82313
NC_002754	1713563	1714087	-	SSO1899	19.4145	54.8071	BOTH	2.823
NC_002754	212541	213524	+	SSO0245	72.6838	204.761	BOTH	2.81715
NC_002754	462588	463667	-	SSO0534	43.1089	121.235	BOTH	2.8123
NC_002754	1287313	1288251	-	SSO1435	105.88	297.443	BOTH	2.80925
NC_002754	2933794	2934696	-	SSO3187	113.257	318.11	BOTH	2.80873
NC_002754	1122730	1123044	+	SSO1293	4.93588	13.8335	BOTH	2.80265
NC_002754	2613640	2613786	-	SSO11307	1.17521	3.29369	BOTH	2.80265
NC_002754	1027899	1028879	-	SSO1185	45.8745	128.535	BOTH	2.80188
NC_002754	2397387	2397809	-	SSO2634	161.729	57.8849	BOTH	2.79397
NC_002754	2078112	2078537	-	SSO2266	27.576	76.9611	BOTH	2.79087
NC_002754	2436090	2436854	+	SSO2676	237.68	85.1711	BOTH	2.79062
NC_002754	2082845	2083261	-	SSO2273	34.1783	95.375	BOTH	2.79051
NC_002754	2208915	2209334	-	SSO2431	160.21	446.46	BOTH	2.78671
NC_002754	1018510	1018917	-	SSO1176	237.116	85.1032	BOTH	2.78621
NC_002754	1014320	1015573	-	SSO1173	43.12	120.133	BOTH	2.78602
NC_002754	2169762	2170484	+	SSO2383	76.1033	211.999	BOTH	2.78568
NC_002754	129588	130016	-	SSO0154	46.9138	130.596	BOTH	2.78374
NC_002754	763524	763581	+	SSOs01	235.305	84.6707	BOTH	2.77906
NC_002754	2606453	2608117	-	SSO2847	3847.01	10684.4	BOTH	2.77732
NC_002754	562244	562795	-	SSO0649	18.1519	50.372	BOTH	2.77503
NC_002754	1807379	1808365	-	SSO1994	36.1439	100.212	BOTH	2.77259
NC_002754	1374981	1375361	+	SSO1523	14.0562	5.08318	BOTH	2.76524
NC_002754	2413574	2415247	-	SSO2656	1649.28	4559.61	BOTH	2.7646
NC_002754	2163267	2164274	+	SSO2371	61.3557	169.419	BOTH	2.76127
NC_002754	1506159	1508567	+	SSO1653	88.3141	243.623	BOTH	2.75859
NC_002754	133415	134593	+	SSO0160	36.3388	99.8501	BOTH	2.74776
NC_002754	1461287	1461955	+	SSO1613	2.84053	1.0339	BOTH	2.7474
NC_002754	1196495	1196905	-	SSO1360	23.9588	65.8018	BOTH	2.74645
NC_002754	2355342	2356199	+	SSO2587	100.472	275.864	BOTH	2.74568
NC_002754	1148854	1149075	+	SSO7675	8.17088	22.4327	BOTH	2.74545
NC_002754	126291	126647	-	SSO0150	94.8463	260.396	BOTH	2.74545
NC_002754	1512162	1512542	+	SSO1657	12.2425	33.5853	BOTH	2.74333
NC_002754	221077	222270	-	SSO0257	39.4271	108.038	BOTH	2.7402
NC_002754	358711	359355	+	SSO0411	232.618	637.307	BOTH	2.73972
NC_002754	847516	849384	+	SSO0990	45.4304	124.42	BOTH	2.7387
NC_002754	2708082	2708855	+	SSO2964	66.848	183.017	BOTH	2.73781
NC_002754	2945105	2945491	-	SSO3200	115.617	316.527	BOTH	2.73772
NC_002754	1324545	1325180	-	SSO1465	96.1565	35.1276	BOTH	2.73735
NC_002754	884108	884749	-	SSO1025	10.6291	29.0892	BOTH	2.73676
NC_002754	1322991	1324553	+	SSO1464	42.7192	15.6213	BOTH	2.73467
NC_002754	241015	242643	-	SSO0283	198.897	72.7767	BOTH	2.73298
NC_002754	2445401	2446762	+	SSO2689	17.821	48.7017	BOTH	2.73283
NC_002754	924309	924665	+	SSO1066	366.078	134.073	BOTH	2.73044
NC_002754	579806	580975	+	SSO0676	42.5983	15.607	BOTH	2.72943
NC_002754	2158360	2160012	+	SSO2365	98.083	267.465	BOTH	2.72692
NC_002754	1785260	1785772	+	SSO1971	12.46	33.9771	BOTH	2.7269
NC_002754	933302	933703	+	SSO1075	358.619	977.637	BOTH	2.72612
NC_002754	961609	962664	+	SSO1115	96.1117	261.605	BOTH	2.72189
NC_002754	2128401	2128889	+	SSO2328	36.9181	13.5789	BOTH	2.71879
NC_002754	1595237	1595479	-	SSO8861	1050.04	2853.23	BOTH	2.71726
NC_002754	183541	184449	-	SSO0214	36.4897	99.1478	BOTH	2.71715
NC_002754	2025294	2025884	-	SSO2201	42.3851	115.162	BOTH	2.71705
NC_002754	384378	385271	+	SSO0445	113.335	307.773	BOTH	2.71561
NC_002754	1828145	1829068	+	SSO2014	2.71099	7.33596	BOTH	2.706
NC_002754	352910	353668	+	SSO0403	484.809	1310.99	BOTH	2.70415
NC_002754	1731693	1731971	-	SSO9221	142.725	385.504	BOTH	2.70103
NC_002754	511812	512660	-	SSO0583	51.2773	138.498	BOTH	2.70096
NC_002754	1728311	1728613	-	SSO1908	140.257	378.481	BOTH	2.69848
NC_002754	843169	844869	-	SSO0987	36.6128	98.7702	BOTH	2.69769
NC_002754	2615996	2616553	-	SSO2858	33.4366	12.3956	BOTH	2.69745
NC_002754	2523283	2524260	+	SSO2765	9.7153	26.1677	BOTH	2.69345
NC_002754	1606108	1606950	-	SSO1774	743.177	2000.12	BOTH	2.6913
NC_002754	1600302	1600553	-	SSO8875	34.6197	12.9003	BOTH	2.68363
NC_002754	1553572	1554099	+	SSO1706	62.1659	23.1869	BOTH	2.68108
NC_002754	907366	907821	+	SSO1049	81.074	217.362	BOTH	2.68104
NC_002754	2779045	2779344	-	SSO3030	6.6223	17.753	BOTH	2.68079
NC_002754	943500	944810	-	SSO1089	288.98	774.403	BOTH	2.67978
NC_002754	2407744	2408673	-	SSO2647	112.384	41.9468	BOTH	2.67921
NC_002754	1399795	1400979	-	SSO1550	75.444	28.1924	BOTH	2.67604
NC_002754	2471736	2472941	+	SSO2719	51.8554	138.737	BOTH	2.67545
NC_002754	1997307	1998119	+	SSO2174	29.1114	77.8454	BOTH	2.67406
NC_002754	2053505	2054482	+	SSO2237	185.562	495.347	BOTH	2.66944
NC_002754	1821974	1822300	-	SSO2005	0.792457	2.11522	BOTH	2.66919
NC_002754	2673081	2673608	-	SSO2925	56.9309	21.3529	BOTH	2.66619
NC_002754	233827	234093	+	SSO5544	538.648	1435.94	BOTH	2.66582
NC_002754	727824	728192	+	SSO0847	25.9836	9.74719	BOTH	2.66575
NC_002754	348688	349437	+	SSO0397	199.821	531.945	BOTH	2.66211
NC_002754	2134090	2134554	-	SSO2337	18.9474	50.4254	BOTH	2.66134
NC_002754	2905141	2905404	+	SSO12083	48.0968	18.0779	BOTH	2.66053
NC_002754	1008055	1008945	-	SSO1169	68.9278	183.05	BOTH	2.65567
NC_002754	385258	385404	-	SSO5865	148.664	394.773	BOTH	2.65547
NC_002754	1140404	1140805	+	SSO1310	7.30559	2.75294	BOTH	2.65374
NC_002754	1625572	1626099	-	SSO1793	41.7166	15.7199	BOTH	2.65374
NC_002754	356770	357768	+	SSO0407	278.156	738.064	BOTH	2.65342
NC_002754	2707149	2707325	-	SSO11571	48.313	128.175	BOTH	2.65301
NC_002754	1904282	1906378	+	SSO2091	107.179	40.4055	BOTH	2.6526
NC_002754	2142903	2143901	-	SSO2348	102.633	272.239	BOTH	2.65255
NC_002754	2139827	2140612	+	SSO2344	122.753	325.07	BOTH	2.64816
NC_002754	2152400	2153350	+	SSO2357	550.239	1456.96	BOTH	2.64786
NC_002754	1290519	1291598	-	SSO1438	32.3117	85.3067	BOTH	2.64012
NC_002754	2696579	2696983	+	SSO2952	27.9395	10.5886	BOTH	2.63864
NC_002754	1040300	1040428	+	SSO7389	38.167	14.4769	BOTH	2.6364
NC_002754	2100345	2102009	-	SSO2291	13.1772	34.7292	BOTH	2.63556
NC_002754	524987	525586	+	SSO0600	50.531	133.148	BOTH	2.63497
NC_002754	566686	567546	-	SSO0656	201.849	531.329	BOTH	2.63231
NC_002754	2409368	2411635	-	SSO2651	121.759	319.976	BOTH	2.62794
NC_002754	944625	945254	+	SSO1088	942.478	2476.42	BOTH	2.62756
NC_002754	2366253	2369225	-	SSO2602	73.1873	192.287	BOTH	2.62733
NC_002754	105256	106164	-	SSO0125	1512.61	576.32	BOTH	2.6246
NC_002754	1111161	1111412	+	SSO7578	14.3963	5.48949	BOTH	2.62252
NC_002754	1263897	1264631	+	SSO1409	4.70084	12.3278	BOTH	2.62248
NC_002754	891622	892419	+	SSO1032	111.598	42.558	BOTH	2.62227
NC_002754	224131	224382	-	SSO5522	329.744	862.948	BOTH	2.61702
NC_002754	2036095	2037138	-	SSO2213	27.9652	73.1427	BOTH	2.61549
NC_002754	2733830	2734393	+	SSO2991	160.044	418.439	BOTH	2.61453
NC_002754	1435680	1436033	+	SSO1589	21.2285	55.4904	BOTH	2.61396
NC_002754	2411865	2412356	-	SSO2652	30.0216	78.4462	BOTH	2.61299
NC_002754	2444148	2444459	+	SSO2687	16.888	44.1165	BOTH	2.6123
NC_002754	1037675	1038160	-	SSO1195	47.81	124.815	BOTH	2.61064
NC_002754	1899747	1900520	-	SSO2087	179.117	467.194	BOTH	2.60832
NC_002754	1099140	1100186	+	SSO1274	65.1753	169.649	BOTH	2.60296
NC_002754	2915194	2916072	-	SSO3166	14.1506	36.8264	BOTH	2.60246
NC_002754	2077175	2078122	-	SSO2265	20.9567	54.5023	BOTH	2.60072
NC_002754	578557	579279	-	SSO0674	36.7972	14.1588	BOTH	2.5989
NC_002754	601664	602140	-	SSO0697	599.575	1558.23	BOTH	2.59889
NC_002754	300674	301030	-	SSO0352	518.025	199.365	BOTH	2.59837
NC_002754	658336	660396	+	SSO0774	132.019	50.8437	BOTH	2.59656
NC_002754	2910069	2910863	+	SSO3159	66.8206	25.753	BOTH	2.59468
NC_002754	2813690	2814661	+	SSO3059	219.944	569.921	BOTH	2.59121
NC_002754	1842409	1843047	+	SSO2028	19.7358	51.0909	BOTH	2.58875
NC_002754	2443316	2444086	-	SSO2686	72.1496	186.69	BOTH	2.58754
NC_002754	1295499	1295951	-	SSO1443	144.535	373.016	BOTH	2.5808
NC_002754	2654942	2655502	-	SSO2903	4.15722	10.7265	BOTH	2.58021
NC_002754	1176148	1176930	-	SSO1340	2.97855	7.68529	BOTH	2.58021
NC_002754	2463617	2465053	+	SSO2712	843.461	2175.87	BOTH	2.57969
NC_002754	1477947	1479011	-	SSO1626	33.1723	12.8593	BOTH	2.57963
NC_002754	244748	246550	-	SSO0287	30.5652	78.8349	BOTH	2.57924
NC_002754	1951498	1953090	+	SSO2126	110.182	284.095	BOTH	2.57842
NC_002754	1187882	1189561	+	SSO1351	80.8764	31.3724	BOTH	2.57794
NC_002754	1521245	1521631	+	SSO1666	8.25835	21.2686	BOTH	2.5754
NC_002754	1142643	1143347	+	SSO1313	3.43061	8.8299	BOTH	2.57386
NC_002754	2397949	2399346	+	SSO2635	202.908	521.923	BOTH	2.57222
NC_002754	2711847	2712287	-	SSO2967	197.043	76.8529	BOTH	2.5639
NC_002754	1618384	1619436	+	SSO1785	53.7298	137.744	BOTH	2.56364
NC_002754	2304367	2306178	-	SSO2537	72.4106	185.439	BOTH	2.56094
NC_002754	1754545	1755378	+	SSO1936	16.6749	42.6285	BOTH	2.55645
NC_002754	1560502	1561029	-	SSO1717	36.4816	14.2789	BOTH	2.55493
NC_002754	2976437	2977540	-	SSO3232	161.88	413.564	BOTH	2.55476
NC_002754	920502	921533	+	SSO1062	87.6333	34.3157	BOTH	2.55374
NC_002754	90572	93199	-	SSO0112	120.232	306.99	BOTH	2.55331
NC_002754	2709181	2710980	+	SSO2965	18.5233	47.2261	BOTH	2.54956
NC_002754	715707	716276	+	SSO0834	98.3495	38.5882	BOTH	2.54869
NC_002754	502607	503623	+	SSO0570	1141.26	2907.96	BOTH	2.54803
NC_002754	1694683	1695507	-	SSO1880	20.8354	52.9866	BOTH	2.5431
NC_002754	1960696	1962195	+	SSO2133	15.0297	38.1805	BOTH	2.54033
NC_002754	2647129	2649216	-	SSO2896	8.64606	21.8964	BOTH	2.53253
NC_002754	2878899	2879300	-	SSO3128	7.9502	20.1309	BOTH	2.53212
NC_002754	1717572	1718372	-	SSO1901	49.3896	19.5154	BOTH	2.53079
NC_002754	87870	88241	+	SSO0107	400.31	158.23	BOTH	2.52992
NC_002754	2713350	2714999	-	SSO2970	40.1003	101.278	BOTH	2.52562
NC_002754	2059760	2060224	+	SSO2245	329.35	831.647	BOTH	2.52511
NC_002754	61275	61688	+	SSO0077	779.07	308.915	BOTH	2.52195
NC_002754	230049	231119	-	SSO0269	72.1025	181.347	BOTH	2.51513
NC_002754	636769	637074	-	SSO0752	169.086	425.177	BOTH	2.51456
NC_002754	1539641	1540336	+	SSO1686	67.6378	170.037	BOTH	2.51393
NC_002754	1705197	1706417	+	SSO1890	30.8442	77.4949	BOTH	2.51246
NC_002754	94607	95191	-	SSO0115	15.3561	38.5447	BOTH	2.51006
NC_002754	2526654	2527580	+	SSO2769	25.7177	64.5415	BOTH	2.50962
NC_002754	1892833	1893897	-	SSO2077	61.3972	24.4847	BOTH	2.50758
NC_002754	2001586	2002656	+	SSO2178	42.9066	107.465	BOTH	2.50462
NC_002754	1113843	1116323	+	SSO1288	837.702	2095.63	BOTH	2.50164
NC_002754	757372	758109	+	SSO0889	53.9569	134.961	BOTH	2.50128
NC_002754	2605843	2606196	-	SSO2846	30.5007	76.2016	BOTH	2.49836
NC_002754	538820	539326	-	SSO0619	23.8519	9.54976	BOTH	2.49764
NC_002754	709667	709972	+	SSO0828	2.25824	0.904151	BOTH	2.49764
NC_002754	2603913	2604071	+	SSO11280	5.43257	2.17508	BOTH	2.49764
NC_002754	1109513	1110514	-	SSO1284	219.048	546.714	BOTH	2.49586
NC_002754	1908797	1910953	+	SSO2094	38.0031	94.7246	BOTH	2.49255
NC_002754	2387230	2388240	-	SSO2621	498.36	1240.23	BOTH	2.48862
NC_002754	1432890	1433741	-	SSO1586	1045.46	420.201	BOTH	2.48799
NC_002754	2768103	2769890	-	SSO3021	27.3433	68.007	BOTH	2.48715
NC_002754	2942640	2943566	-	SSO3197	69.1396	27.8312	BOTH	2.48425
NC_002754	170623	172464	+	SSO0198	58.2417	144.681	BOTH	2.48415
NC_002754	197205	199007	+	SSO0228	105.493	261.939	BOTH	2.483
NC_002754	376608	377348	-	SSO0434	86.4944	214.69	BOTH	2.48213
NC_002754	2038638	2040353	-	SSO2216	47.8702	118.464	BOTH	2.47468
NC_002754	56786	57235	-	SSO0069	377.375	933.147	BOTH	2.47273
NC_002754	2002689	2003486	+	SSO2179	28.4679	70.381	BOTH	2.4723
NC_002754	1270092	1271321	+	SSO1418	8.84846	21.8749	BOTH	2.47217
NC_002754	2178312	2178830	-	SSO2390	388.617	959.55	BOTH	2.46914
NC_002754	1548839	1549069	+	SSO8725	86.3779	212.892	BOTH	2.46466
NC_002754	1635712	1637694	-	SSO1806	75.1396	185.179	BOTH	2.46447
NC_002754	1242456	1243421	+	SSO1393	12.8762	31.7197	BOTH	2.46344
NC_002754	728189	728737	+	SSO0848	20.4538	8.31523	BOTH	2.4598
NC_002754	2108586	2109635	-	SSO2305	151.367	372.122	BOTH	2.45841
NC_002754	2845130	2845666	+	SSO3091	6.91666	17.0021	BOTH	2.45813
NC_002754	829350	829407	-	SSOs02	373.808	918.259	BOTH	2.4565
NC_002754	1219406	1220197	+	SSO1380	6.21659	2.53265	BOTH	2.45458
NC_002754	1004866	1005948	+	SSO1164	17.5467	7.15306	BOTH	2.45304
NC_002754	2452342	2452662	-	SSO2699	234.108	95.4556	BOTH	2.45254
NC_002754	2488487	2489146	-	SSO2733	16.8829	41.3957	BOTH	2.45193
NC_002754	1777542	1778315	-	SSO1962	19.0835	46.7373	BOTH	2.4491
NC_002754	1041182	1042165	-	SSO1200	47.6658	19.471	BOTH	2.44805
NC_002754	2023658	2025271	-	SSO2200	30.0235	73.3673	BOTH	2.44366
NC_002754	518925	519524	-	SSO0591	103.653	42.4228	BOTH	2.44334
NC_002754	2096394	2096783	+	SSO2286	215.945	527.27	BOTH	2.44169
NC_002754	2518404	2519600	-	SSO2761	67.9766	165.956	BOTH	2.44137
NC_002754	1073916	1074308	+	SSO1243	18.0229	7.39195	BOTH	2.43817
NC_002754	716488	716790	-	SSO0836	66.7077	27.3931	BOTH	2.4352
NC_002754	375949	376620	-	SSO0433	48.459	117.852	BOTH	2.432
NC_002754	1874110	1874577	-	SSO2055	6.45988	2.66029	BOTH	2.42826
NC_002754	322456	323946	+	SSO0379	3109.37	7547.11	BOTH	2.42721
NC_002754	1489637	1489981	-	SSO1637	25.7882	10.6257	BOTH	2.42695
NC_002754	2196594	2197565	+	SSO2416	260.733	632.542	BOTH	2.42601
NC_002754	1222322	1223386	-	SSO1382	13.3825	5.52042	BOTH	2.42418
NC_002754	2886391	2886876	+	SSO3136	5.86516	2.41944	BOTH	2.42418
NC_002754	332169	333398	-	SSO0388	38.9754	94.4728	BOTH	2.42391
NC_002754	629682	630131	-	SSO0741	1183.18	488.169	BOTH	2.42372
NC_002754	774064	775182	-	SSO0909	511.937	211.273	BOTH	2.42311
NC_002754	233371	233670	+	SSO0273	416.917	1009.85	BOTH	2.42218
NC_002754	388033	389013	+	SSO0448	60.7551	147.008	BOTH	2.41968
NC_002754	783434	783847	+	SSO0920	239.521	578.568	BOTH	2.41552
NC_002754	661453	661980	-	SSO0777	31.9009	77.0275	BOTH	2.41459
NC_002754	714739	715269	-	SSO0833	13.827	5.7314	BOTH	2.41249
NC_002754	1416337	1416720	+	SSO1570	74.4559	179.403	BOTH	2.40953
NC_002754	2891046	2892449	+	SSO3142	81.21	195.531	BOTH	2.40773
NC_002754	250595	251596	-	SSO0293	244.134	587.717	BOTH	2.40736
NC_002754	78293	79423	-	SSO0097	2448.98	5885.18	BOTH	2.40312
NC_002754	1996402	1997316	+	SSO2172	20.7684	49.8914	BOTH	2.40227
NC_002754	2541830	2542030	-	SSO11138	0.429741	1.03235	BOTH	2.40227
NC_002754	1327716	1328948	-	SSO1468	9.31732	22.3827	BOTH	2.40227
NC_002754	2417637	2418059	-	SSO2659	0.816812	1.9622	BOTH	2.40227
NC_002754	2826964	2827695	+	SSO3071	6.49014	15.5911	BOTH	2.40227
NC_002754	450970	451329	-	SSO0523	38.87	93.3762	BOTH	2.40227
NC_002754	1112085	1112411	+	SSO1286	0.792457	1.90369	BOTH	2.40227
NC_002754	1749076	1749408	+	SSO1928	2.59393	6.23131	BOTH	2.40227
NC_002754	1341520	1341696	+	SSO8194	0.48801	1.17233	BOTH	2.40227
NC_002754	440776	441159	+	SSO0507	44.5386	18.5528	BOTH	2.40064
NC_002754	1292310	1293857	-	SSO1440	27.1186	65.1015	BOTH	2.40062
NC_002754	2345414	2345728	+	SSO2574	2926.43	7018.64	BOTH	2.39837
NC_002754	1189545	1189979	+	SSO1352	50.6353	21.1478	BOTH	2.39435
NC_002754	1575540	1576487	-	SSO1739	185.968	444.993	BOTH	2.39285
NC_002754	1876867	1878735	-	SSO2059	155.332	371.669	BOTH	2.39274
NC_002754	2822074	2823936	+	SSO3066	1465.04	612.67	BOTH	2.39124
NC_002754	842473	843159	-	SSO0986	30.4271	72.5907	BOTH	2.38572
NC_002754	643584	644639	-	SSO0760	389.437	163.422	BOTH	2.38302
NC_002754	2988382	2988735	+	SSO3247	8.78419	20.9066	BOTH	2.38002
NC_002754	796129	797463	-	SSO0938	104.689	248.951	BOTH	2.37802
NC_002754	246892	247233	-	SSO0288	24.7515	58.8531	BOTH	2.37775
NC_002754	1207453	1207842	-	SSO1372	21.0408	8.86764	BOTH	2.37276
NC_002754	1571734	1572228	+	SSO1732	6.63103	2.79465	BOTH	2.37276
NC_002754	2083299	2084168	+	SSO2274	140.389	332.402	BOTH	2.36772
NC_002754	956435	956857	-	SSO1105	14.09	33.3574	BOTH	2.36745
NC_002754	193195	195144	-	SSO0227	178.647	422.632	BOTH	2.36573
NC_002754	470914	471864	+	SSO0541	5.81302	13.7462	BOTH	2.36473
NC_002754	858177	859004	+	SSO1000	204.678	483.588	BOTH	2.36268
NC_002754	1043804	1044325	+	SSO1203	51.9591	21.9958	BOTH	2.36223
NC_002754	2020615	2023653	-	SSO2199	19.7256	46.5669	BOTH	2.36073
NC_002754	759126	759740	+	SSO0892	43.1187	101.783	BOTH	2.36053
NC_002754	1068491	1068838	+	SSO1231	8.43922	3.57763	BOTH	2.35888
NC_002754	2009385	2010569	+	SSO2184	81.9314	193.261	BOTH	2.35881
NC_002754	1271424	1273034	-	SSO1419	43.1621	101.755	BOTH	2.3575
NC_002754	2736391	2737575	-	SSO2995	31.5625	74.3624	BOTH	2.35603
NC_002754	555969	559124	+	SSO0641	32.9254	77.3204	BOTH	2.34835
NC_002754	976832	978007	+	SSO1138	108.707	255.026	BOTH	2.346
NC_002754	790181	792706	+	SSO0929	3341.62	1425.93	BOTH	2.34347
NC_002754	2030995	2031663	+	SSO2207	106.132	248.652	BOTH	2.34284
NC_002754	520622	521494	+	SSO0593	62.8293	146.892	BOTH	2.33795
NC_002754	2336560	2337624	-	SSO2566	61.3161	26.2382	BOTH	2.3369
NC_002754	591723	594278	-	SSO0687	88.5069	206.583	BOTH	2.33409
NC_002754	1137335	1138072	+	SSO1307	3.27721	1.40585	BOTH	2.33113
NC_002754	968295	968696	-	SSO1125	642.462	1497.43	BOTH	2.33076
NC_002754	180731	181381	+	SSO0209	232.199	540.91	BOTH	2.32951
NC_002754	493405	495510	-	SSO0559	1065.45	2481.85	BOTH	2.3294
NC_002754	88218	88610	-	SSO0108	775.423	332.99	BOTH	2.32867
NC_002754	973849	974541	+	SSO1134	342.146	794.579	BOTH	2.32234
NC_002754	2190033	2190209	+	SSO10342	1052.15	453.302	BOTH	2.32108
NC_002754	316920	317429	+	SSO0372	33.3656	77.4406	BOTH	2.32097
NC_002754	2292023	2293702	+	SSO2523	9.46043	21.9442	BOTH	2.31958
NC_002754	1731193	1731696	+	SSO1911	109.515	253.752	BOTH	2.31705
NC_002754	2099610	2100353	+	SSO2290	19.9691	46.2047	BOTH	2.31381
NC_002754	2521316	2523199	+	SSO2764	251.614	581.353	BOTH	2.31049
NC_002754	1278289	1279041	+	SSO1425	84.6572	195.47	BOTH	2.30895
NC_002754	342491	343210	-	SSO0393	72.9413	31.6057	BOTH	2.30785
NC_002754	1646872	1648302	+	SSO1816	29.6377	68.3942	BOTH	2.30768
NC_002754	2495767	2497512	+	SSO2742	53.9243	124.43	BOTH	2.3075
NC_002754	2288111	2289037	-	SSO2519	15.6542	36.1134	BOTH	2.30694
NC_002754	2461882	2462790	-	SSO2710	35.6344	15.4467	BOTH	2.30693
NC_002754	398312	398935	-	SSO0465	113.925	262.482	BOTH	2.304
NC_002754	2571427	2572662	+	SSO2811	29.2119	67.2649	BOTH	2.30265
NC_002754	2934749	2935120	-	SSO3188	23.9164	55.0366	BOTH	2.3012
NC_002754	70054	71214	+	SSO0087	186.371	428.767	BOTH	2.30061
NC_002754	664567	664836	+	SSO6503	583.53	253.871	BOTH	2.29853
NC_002754	2616522	2617922	-	SSO2860	164.186	71.4386	BOTH	2.29828
NC_002754	1129863	1130912	-	SSO1300	64.3309	27.9964	BOTH	2.29783
NC_002754	996526	997824	+	SSO1155	28.7926	66.1325	BOTH	2.29686
NC_002754	2341282	2342274	+	SSO2569	162.752	373.7	BOTH	2.29613
NC_002754	320846	321364	+	SSO0377	34.1184	78.23	BOTH	2.2929
NC_002754	387452	388036	+	SSO0447	89.1833	204.31	BOTH	2.2909
NC_002754	2345762	2347282	+	SSO2575	111.309	254.979	BOTH	2.29073
NC_002754	438552	439487	+	SSO0505	56.201	128.729	BOTH	2.2905
NC_002754	529769	530119	-	SSO0605	989.531	2266.37	BOTH	2.29035
NC_002754	2153347	2154228	+	SSO2358	693.079	1586.54	BOTH	2.28912
NC_002754	574555	575757	-	SSO0666	508.502	1162.57	BOTH	2.28626
NC_002754	152828	153853	+	SSO0181	93.6181	213.84	BOTH	2.28417
NC_002754	957454	957804	+	SSO1107	243.384	555.311	BOTH	2.28163
NC_002754	1072986	1073279	+	SSO7475	37.0191	84.4597	BOTH	2.28152
NC_002754	1948091	1948954	+	SSO2123	12.5968	5.5238	BOTH	2.28045
NC_002754	2614967	2615377	+	SSO2856	9.66759	22.0461	BOTH	2.28041
NC_002754	500274	500432	+	SSO6175	2272.44	998.362	BOTH	2.27617
NC_002754	1644216	1644461	+	SSO8979	28.7926	12.6526	BOTH	2.27563
NC_002754	199416	199601	-	SSO5478	271.208	616.93	BOTH	2.27475
NC_002754	85752	86957	+	SSO0104	452.445	1029.08	BOTH	2.27449
NC_002754	816329	816649	-	SSO0961	1039.23	2358.38	BOTH	2.26936
NC_002754	1756303	1756749	+	SSO1937	1.15943	2.63053	BOTH	2.26881
NC_002754	1653672	1654013	+	SSO1823	413.452	935.178	BOTH	2.26188
NC_002754	275424	275813	+	SSO0322	713.393	1613.56	BOTH	2.26181
NC_002754	2649690	2649938	+	SSO11412	59.3197	134.168	BOTH	2.26178
NC_002754	2000418	2001149	+	SSO2177	122.251	276.387	BOTH	2.26082
NC_002754	923215	924312	+	SSO1065	45.785	103.499	BOTH	2.26055
NC_002754	627207	627908	-	SSO0737	387.839	876.418	BOTH	2.25975
NC_002754	2403574	2404050	+	SSO2641	15.0301	33.9313	BOTH	2.25755
NC_002754	1550386	1550775	-	SSO1701	22.8126	10.1091	BOTH	2.25664
NC_002754	2203048	2203587	+	SSO2424	125.408	282.947	BOTH	2.25621
NC_002754	1985781	1986086	-	SSO2160	35.2851	79.5653	BOTH	2.25493
NC_002754	2621174	2621488	-	SSO2865	42.7776	96.3954	BOTH	2.25341
NC_002754	1150918	1151769	+	SSO1320	684.839	1541.74	BOTH	2.25124
NC_002754	2978992	2979753	+	SSO3234	2.94728	6.62629	BOTH	2.24828
NC_002754	2449611	2450486	+	SSO2694	34.7089	78.0109	BOTH	2.24758
NC_002754	220557	221096	-	SSO0256	41.9093	94.1448	BOTH	2.2464
NC_002754	1870209	1870694	+	SSO2049	14.3963	32.3067	BOTH	2.24409
NC_002754	2756764	2759355	-	SSO3012	46.988	105.433	BOTH	2.24382
NC_002754	1775365	1775841	+	SSO1959	52.1527	117.019	BOTH	2.24378
NC_002754	467074	467478	-	SSO0539	46.708	104.691	BOTH	2.24139
NC_002754	231116	231613	-	SSO0270	108.753	243.753	BOTH	2.24135
NC_002754	36667	37320	-	SSO0042	13.7359	6.13413	BOTH	2.23926
NC_002754	1415376	1415939	+	SSO1568	112.72	252.388	BOTH	2.23907
NC_002754	1439192	1439734	-	SSO1594	27.0428	60.5057	BOTH	2.23741
NC_002754	413903	415324	-	SSO0480	30.8579	69.0217	BOTH	2.23676
NC_002754	2180744	2181439	-	SSO2394	31.523	70.4595	BOTH	2.23518
NC_002754	1939450	1940055	-	SSO2115	12.1157	27.0507	BOTH	2.2327
NC_002754	1231762	1232895	-	SSO1389	146.172	326.198	BOTH	2.2316
NC_002754	2626022	2626558	-	SSO2872	97.9592	43.9221	BOTH	2.2303
NC_002754	1525316	1526503	-	SSO1672	22.3216	10.0142	BOTH	2.229
NC_002754	2627766	2629379	-	SSO2875	36.6597	16.4562	BOTH	2.22771
NC_002754	750854	751135	-	SSO6716	54.2159	120.675	BOTH	2.22583
NC_002754	382601	384325	-	SSO0444	83.9242	186.572	BOTH	2.2231
NC_002754	977985	979136	-	SSO1140	51.5118	114.499	BOTH	2.22277
NC_002754	164888	165574	-	SSO0191	181.18	402.42	BOTH	2.22111
NC_002754	1293799	1294521	-	SSO1441	60.572	134.508	BOTH	2.22064
NC_002754	1538100	1538882	+	SSO1684	4.85393	10.7771	BOTH	2.22028
NC_002754	1131243	1131932	-	SSO1302	6.00889	2.70656	BOTH	2.22012
NC_002754	549129	550580	+	SSO0635	35.1579	77.8373	BOTH	2.21393
NC_002754	1463138	1464673	+	SSO1615	55.3921	122.439	BOTH	2.21041
NC_002754	2583645	2586584	-	SSO2824	34.6393	15.6921	BOTH	2.20743
NC_002754	2657556	2658920	+	SSO2907	25.2489	55.6888	BOTH	2.20559
NC_002754	45603	46343	-	SSO0053	44.0632	97.0773	BOTH	2.20314
NC_002754	1650236	1651222	-	SSO1818	200.848	442.476	BOTH	2.20304
NC_002754	385500	385661	+	SSO5866	242.604	110.156	BOTH	2.20238
NC_002754	181819	182715	-	SSO0212	50.2667	110.653	BOTH	2.20131
NC_002754	1006952	1008058	-	SSO1168	76.8583	169.139	BOTH	2.20066
NC_002754	2687185	2689239	+	SSO2942	56.7025	25.7822	BOTH	2.19929
NC_002754	2624903	2626015	-	SSO2871	166.469	75.6928	BOTH	2.19928
NC_002754	1930061	1930384	-	SSO2108	16.7957	36.9321	BOTH	2.1989
NC_002754	959676	960710	+	SSO1112	59.2544	130.048	BOTH	2.19475
NC_002754	439809	440795	+	SSO0506	21.5288	9.811	BOTH	2.19436
NC_002754	2921283	2922686	+	SSO3175	19.3796	42.5154	BOTH	2.19382
NC_002754	522187	522768	+	SSO0596	39.7754	87.232	BOTH	2.19311
NC_002754	50238	51206	-	SSO0060	70.7781	154.895	BOTH	2.18846
NC_002754	348369	348683	+	SSO0396	147.528	322.782	BOTH	2.18794
NC_002754	43434	43829	+	SSO0049	54.3133	118.773	BOTH	2.1868
NC_002754	2541232	2541843	-	SSO2784	0.987982	0.452076	BOTH	2.18544
NC_002754	1524224	1525270	-	SSO1671	2.72251	5.94564	BOTH	2.18388
NC_002754	35370	35828	+	SSO0040	26.158	57.1122	BOTH	2.18336
NC_002754	2692952	2693479	-	SSO2947	49.7327	22.7939	BOTH	2.18185
NC_002754	1585642	1586121	+	SSO1751	12.2369	5.61987	BOTH	2.17743
NC_002754	519526	520656	+	SSO0592	75.9911	164.693	BOTH	2.16727
NC_002754	243318	243557	-	SSO5561	108.692	235.458	BOTH	2.16628
NC_002754	1016716	1018521	+	SSO1175	527.689	1142.38	BOTH	2.16486
NC_002754	1248041	1248832	+	SSO1400	172.319	372.736	BOTH	2.16305
NC_002754	2587322	2587951	-	SSO2826	10.9686	23.7146	BOTH	2.16204
NC_002754	687242	687691	+	SSO0802	12.2849	5.68711	BOTH	2.16012
NC_002754	1126665	1127120	-	SSO1298	74.2546	34.4321	BOTH	2.15655
NC_002754	1772463	1773191	+	SSO1954	29.622	63.8543	BOTH	2.15563
NC_002754	1178229	1179092	-	SSO1342	2.89926	6.2443	BOTH	2.15376
NC_002754	2096761	2097717	+	SSO2287	162.647	350.247	BOTH	2.15342
NC_002754	289591	290643	-	SSO0337	309.09	143.59	BOTH	2.15259
NC_002754	2166139	2166465	-	SSO2375	245.662	528.804	BOTH	2.15257
NC_002754	1992750	1993250	+	SSO2167	38.62	83.1115	BOTH	2.15203
NC_002754	942230	942550	+	SSO1086	329.635	709.129	BOTH	2.15126
NC_002754	2203577	2205262	-	SSO2425	28.6389	61.537	BOTH	2.14872
NC_002754	1156629	1158419	-	SSO1327	29.082	62.4864	BOTH	2.14863
NC_002754	1978700	1979764	+	SSO2153	137.799	64.1667	BOTH	2.14752
NC_002754	929426	930694	-	SSO1072	3.74372	1.74418	BOTH	2.14641
NC_002754	182678	183577	-	SSO0213	37.8143	81.0798	BOTH	2.14416
NC_002754	2586859	2587335	-	SSO2825	13.4003	28.7111	BOTH	2.14256
NC_002754	590460	591716	-	SSO0686	153.446	328.56	BOTH	2.14121
NC_002754	1630939	1631898	-	SSO1801	23.7539	11.0956	BOTH	2.14083
NC_002754	704511	705065	-	SSO0822	23.1897	10.8425	BOTH	2.13878
NC_002754	2530455	2532050	-	SSO2774	22.7851	48.712	BOTH	2.13789
NC_002754	462181	462582	-	SSO0532	69.618	148.831	BOTH	2.13782
NC_002754	2932565	2932759	-	SSO12142	1440.07	3074.94	BOTH	2.13527
NC_002754	1857849	1859327	-	SSO2042	47.1895	100.735	BOTH	2.13469
NC_002754	2707414	2707995	-	SSO2963	34.5808	73.6837	BOTH	2.13077
NC_002754	1289656	1290519	-	SSO1437	16.4958	35.1442	BOTH	2.1305
NC_002754	2824836	2825723	+	SSO3068	3.40453	7.2439	BOTH	2.12772
NC_002754	325069	326844	-	SSO0382	285.689	607.67	BOTH	2.12703
NC_002754	987576	988091	+	SSO1146	10.7135	22.7878	BOTH	2.12701
NC_002754	67859	68911	-	SSO0084	173.084	367.974	BOTH	2.12599
NC_002754	1773710	1774120	-	SSO1957	21.2267	45.102	BOTH	2.12478
NC_002754	222803	224134	-	SSO0258	65.1725	138.439	BOTH	2.12419
NC_002754	2187883	2189076	+	SSO2404	30.5289	64.8229	BOTH	2.12333
NC_002754	2115365	2116315	+	SSO2312	15.7133	33.311	BOTH	2.11992
NC_002754	825625	826563	+	SSO0967	97.4166	206.471	BOTH	2.11947
NC_002754	1583348	1583689	+	SSO1747	14.1437	6.67406	BOTH	2.11921
NC_002754	477077	478162	+	SSO0546	9.38544	19.8713	BOTH	2.11725
NC_002754	524697	524990	+	SSO6223	57.879	122.337	BOTH	2.11367
NC_002754	391248	392390	+	SSO0452	276.515	584.324	BOTH	2.11317
NC_002754	2535490	2536368	-	SSO2779	17.3935	36.7477	BOTH	2.11273
NC_002754	527778	529298	-	SSO0604	579.26	1223.28	BOTH	2.1118
NC_002754	1671467	1671913	-	SSO1847	2.12563	4.48738	BOTH	2.11108
NC_002754	381178	381825	-	SSO0440	58.1184	27.5389	BOTH	2.11041
NC_002754	2948037	2949995	+	SSO3203	16.9316	35.7313	BOTH	2.11033
NC_002754	317426	318394	+	SSO0373	43.5009	91.7952	BOTH	2.11019
NC_002754	1747527	1748480	+	SSO1926	6.70017	14.138	BOTH	2.1101
NC_002754	2955990	2957621	-	SSO3210	32.9739	69.549	BOTH	2.10921
NC_002754	328136	329296	-	SSO0384	12.3503	26.0347	BOTH	2.10801
NC_002754	725782	726456	-	SSO0845	60.6565	28.7942	BOTH	2.10655
NC_002754	2952434	2952814	+	SSO3206	120.158	252.888	BOTH	2.10463
NC_002754	233034	233282	+	SSO5542	100.601	211.669	BOTH	2.10406
NC_002754	779470	780996	-	SSO0917	58.7166	123.523	BOTH	2.10372
NC_002754	2166513	2167706	-	SSO2377	63.5897	133.759	BOTH	2.10346
NC_002754	2527607	2528839	+	SSO2770	18.4945	38.8752	BOTH	2.10198
NC_002754	633223	633849	-	SSO0746	148.785	312.743	BOTH	2.10198
NC_002754	2057280	2057534	+	SSO10075	2.70989	5.69615	BOTH	2.10198
NC_002754	2257164	2258801	+	SSO2486	0.42187	0.886764	BOTH	2.10198
NC_002754	392359	392811	-	SSO0454	231.294	110.088	BOTH	2.101
NC_002754	1561035	1561487	-	SSO1719	21.1654	10.0774	BOTH	2.10029
NC_002754	2712932	2713372	-	SSO2969	52.8844	111.045	BOTH	2.09976
NC_002754	1555338	1556732	-	SSO1710	6.74924	14.131	BOTH	2.09372
NC_002754	2003859	2007092	-	SSO2181	418.481	876.123	BOTH	2.09358
NC_002754	2379966	2380937	-	SSO2615	183.42	383.98	BOTH	2.09345
NC_002754	1112517	1113728	+	SSO1287	637.928	304.805	BOTH	2.0929
NC_002754	794235	796136	-	SSO0936	61.7179	129.098	BOTH	2.09175
NC_002754	918081	918722	-	SSO1059	126.876	60.6563	BOTH	2.09172
NC_002754	2779559	2779981	-	SSO3031	3.67565	7.68529	BOTH	2.09086
NC_002754	755751	756056	+	SSO0887	28.7926	60.1261	BOTH	2.08825
NC_002754	654081	655298	+	SSO0769	262.892	125.899	BOTH	2.08813
NC_002754	779052	779477	+	SSO0916	140.516	293.394	BOTH	2.08797
NC_002754	1202740	1203462	+	SSO1368	6.6904	13.9674	BOTH	2.08768
NC_002754	406507	407622	-	SSO0472	84.4429	176.142	BOTH	2.08593
NC_002754	1761916	1762989	+	SSO1943	6.83624	14.2328	BOTH	2.08197
NC_002754	1479404	1480378	+	SSO1627	1.77185	3.68894	BOTH	2.08197
NC_002754	1227624	1227929	+	SSO1387	2.82281	1.35623	BOTH	2.08137
NC_002754	2900316	2901368	-	SSO3148	57.8313	27.7853	BOTH	2.08137
NC_002754	1560255	1560485	+	SSO8760	21.314	44.3152	BOTH	2.07916
NC_002754	826592	828184	+	SSO0968	75.479	156.919	BOTH	2.07897
NC_002754	1102450	1103427	+	SSO1277	61.7363	128.08	BOTH	2.07463
NC_002754	1160738	1161943	-	SSO1329	8.73806	18.1235	BOTH	2.07409
NC_002754	599801	601210	-	SSO0695	2672.14	5538.21	BOTH	2.07258
NC_002754	1903244	1904257	+	SSO2090	21.2111	43.9289	BOTH	2.07103
NC_002754	2145310	2145849	+	SSO2351	91.9764	190.339	BOTH	2.06943
NC_002754	473189	474277	-	SSO0543	15.0705	31.1857	BOTH	2.06932
NC_002754	1830100	1830342	+	SSO9500	1518.9	3141.29	BOTH	2.06814
NC_002754	199626	199922	+	SSO5479	264.369	546.587	BOTH	2.06752
NC_002754	22598	23215	+	SSO0023	63.176	130.613	BOTH	2.06744
NC_002754	313213	313614	-	SSO0368	161.797	78.2867	BOTH	2.06673
NC_002754	283168	284619	+	SSO0329	234.624	484.459	BOTH	2.06483
NC_002754	900535	901119	-	SSO1040	17.2756	35.5888	BOTH	2.06006
NC_002754	2290030	2290965	-	SSO2521	314.504	647.19	BOTH	2.05781
NC_002754	1990523	1990903	-	SSO2164	24.7118	50.8318	BOTH	2.05699
NC_002754	227300	227599	+	SSO0262	24.1858	11.7585	BOTH	2.05688
NC_002754	1628665	1629027	+	SSO1799	6.66275	3.23925	BOTH	2.05688
NC_002754	1835795	1836595	+	SSO2022	13.4797	27.7188	BOTH	2.05634
NC_002754	2403261	2403581	+	SSO2640	16.1454	33.1832	BOTH	2.05527
NC_002754	227596	228060	-	SSO0264	53.4985	26.0308	BOTH	2.0552
NC_002754	1549199	1549657	+	SSO1697	43.8476	90.1137	BOTH	2.05516
NC_002754	577862	578560	-	SSO0673	131.235	269.348	BOTH	2.05241
NC_002754	1266753	1267172	+	SSO1413	21.5945	44.3002	BOTH	2.05146
NC_002754	2974651	2975121	-	SSO3230	35.028	71.8109	BOTH	2.0501
NC_002754	2732820	2733503	-	SSO2990	3.15709	6.47182	BOTH	2.04994
NC_002754	751957	754356	+	SSO0883	1705.21	832.634	BOTH	2.04797
NC_002754	887650	889623	+	SSO1029	96.6609	197.657	BOTH	2.04485
NC_002754	2944751	2945137	+	SSO3199	39.9525	81.4998	BOTH	2.03991
NC_002754	1982669	1983019	+	SSO2155	528.603	1078.11	BOTH	2.03954
NC_002754	2400889	2403138	+	SSO2639	189.609	386.693	BOTH	2.03942
NC_002754	1275779	1276312	+	SSO1421	30.8955	62.9503	BOTH	2.03753
NC_002754	1742293	1742688	+	SSO1922	43.4071	21.3092	BOTH	2.03701
NC_002754	1510060	1510713	+	SSO1656	6.07551	12.374	BOTH	2.03671
NC_002754	2959013	2959447	-	SSO3212	182.486	371.597	BOTH	2.03631
NC_002754	935746	936423	+	SSO1078	40.2587	81.8177	BOTH	2.0323
NC_002754	276282	277514	+	SSO0324	911.626	1851.54	BOTH	2.03103
NC_002754	2092022	2093347	+	SSO2283	29.0532	58.9959	BOTH	2.03062
NC_002754	343263	343532	-	SSO5761	68.1425	33.5591	BOTH	2.03052
NC_002754	420471	421244	-	SSO0488	67.8524	33.4221	BOTH	2.03017
NC_002754	895429	896043	-	SSO1034	23.8768	48.4735	BOTH	2.03015
NC_002754	647431	647658	+	SSO6469	26.8984	54.606	BOTH	2.03009
NC_002754	724600	724884	-	SSO6659	19.7002	9.70773	BOTH	2.02933
NC_002754	1466644	1467852	+	SSO1618	90.2359	182.902	BOTH	2.02693
NC_002754	1985101	1985769	-	SSO2159	114.396	231.799	BOTH	2.02629
NC_002754	1601950	1603074	+	SSO1768	28.1784	57.0556	BOTH	2.0248
NC_002754	1688414	1688794	+	SSO1874	9.52197	19.2435	BOTH	2.02096
NC_002754	2989274	2990017	+	SSO3250	342.609	169.572	BOTH	2.02043
NC_002754	2469166	2470119	-	SSO2717	41.2875	20.4458	BOTH	2.01937
NC_002754	2508253	2510007	-	SSO2754	33.4191	67.4729	BOTH	2.01899
NC_002754	1185287	1186006	-	SSO1348	5.03871	2.49772	BOTH	2.01732
NC_002754	1091187	1092941	-	SSO1268	15.8975	7.88234	BOTH	2.01684
NC_002754	641976	642161	-	SSO6453	1336.07	2694.56	BOTH	2.01678
NC_002754	1999829	2000383	-	SSO2176	17.1199	34.5215	BOTH	2.01645
NC_002754	1697284	1697487	-	SSO9134	12.2792	24.7511	BOTH	2.0157
NC_002754	700784	701518	+	SSO0818	98.6	198.657	BOTH	2.01477
NC_002754	2420009	2420575	-	SSO2663	167.271	336.933	BOTH	2.01429
NC_002754	2769914	2772109	-	SSO3022	32.844	66.1439	BOTH	2.01388
NC_002754	901697	902134	+	SSO1042	111.423	55.4288	BOTH	2.01021
NC_002754	1819856	1820893	+	SSO2002	10.1523	20.3904	BOTH	2.00845
NC_002754	2702086	2702340	+	SSO11553	1.35495	2.71245	BOTH	2.00189
NC_002754	2246229	2246516	-	SSO10449	1.19969	2.40165	BOTH	2.00189
NC_002754	1843882	1845474	+	SSO2030	5.63923	11.2891	BOTH	2.00189
NC_002754	2934771	2934827	-	SSOs06	45.462	91.01	BOTH	2.00189
NC_002754	2612718	2613491	+	SSO2853	8.92794	17.8728	BOTH	2.00189
NC_002754	599211	599798	-	SSO0694	3172.77	6350.95	BOTH	2.0017
NC_002754	2156037	2157185	-	SSO2363	194.031	388.217	BOTH	2.0008
NC_002754	106161	107822	-	SSO0127	127.124	63.5909	BOTH	1.99909
NC_002754	2730848	2731819	+	SSO2988	24.7048	49.3851	BOTH	1.99901
NC_002754	1320555	1320905	+	SSO1461	21.656	10.8382	BOTH	1.99811
NC_002754	1853782	1855065	+	SSO2039	5.04544	10.0735	BOTH	1.99655
NC_002754	775996	776793	-	SSO0911	331.332	166.158	BOTH	1.99407
NC_002754	1348773	1349345	+	SSO1495	110.95	55.6479	BOTH	1.99378
NC_002754	1781080	1782312	+	SSO1967	3.15248	6.28286	BOTH	1.99299
NC_002754	463667	464719	-	SSO0535	88.0185	175.316	BOTH	1.99181
NC_002754	122786	124021	+	SSO0144	189.947	95.4132	BOTH	1.99079
NC_002754	2037536	2038666	-	SSO2215	51.5518	102.62	BOTH	1.99062
NC_002754	2641647	2641901	+	SSO11389	17.2756	8.67985	BOTH	1.99031
NC_002754	351214	351678	-	SSO0400	38.4521	19.3372	BOTH	1.98851
NC_002754	2925963	2926160	+	SSO12127	84.1966	166.98	BOTH	1.98322
NC_002754	2113415	2114233	+	SSO2310	62.1203	123.133	BOTH	1.98218
NC_002754	1061851	1062744	+	SSO1222	11.4977	5.80265	BOTH	1.98146
NC_002754	417750	418706	+	SSO0485	2208.1	4372.88	BOTH	1.98038
NC_002754	255258	256103	+	SSO0297	309.061	611.553	BOTH	1.97874
NC_002754	984427	985140	-	SSO1143	78.5143	155.288	BOTH	1.97783
NC_002754	1107906	1109516	-	SSO1283	267.98	529.297	BOTH	1.97513
NC_002754	1167837	1168136	-	SSO1332	24.1858	47.7256	BOTH	1.97329
NC_002754	1431061	1432560	+	SSO1584	959.716	1893.25	BOTH	1.97272
NC_002754	2069543	2071048	+	SSO2254	59.65	117.622	BOTH	1.97186
NC_002754	1715787	1717454	-	SSO1900	171.202	86.9156	BOTH	1.96975
NC_002754	13020	13880	-	SSO0015	2891.7	1468.34	BOTH	1.96936
NC_002754	1390102	1391334	-	SSO1538	5.95468	11.7243	BOTH	1.96892
NC_002754	1861881	1863143	+	SSO2044	1884.38	3709.64	BOTH	1.96863
NC_002754	603389	603844	-	SSO0700	355.93	700.473	BOTH	1.96801
NC_002754	249	857	+	SSO0001	51.77	101.877	BOTH	1.96788
NC_002754	1127121	1128389	-	SSO1299	92.3678	181.667	BOTH	1.96678
NC_002754	683080	683778	-	SSO0799	110.969	218.19	BOTH	1.96622
NC_002754	1484423	1484911	-	SSO1634	48.2232	94.628	BOTH	1.96229
NC_002754	1132569	1133720	+	SSO1303	11.2471	22.0352	BOTH	1.95918
NC_002754	1906943	1908628	+	SSO2093	43.3426	22.1533	BOTH	1.95648
NC_002754	374318	375382	+	SSO0430	114.927	224.584	BOTH	1.95414
NC_002754	188611	188985	-	SSO0220	231.493	451.71	BOTH	1.95129
NC_002754	1216914	1219409	+	SSO1379	1.73033	0.886764	BOTH	1.95128
NC_002754	464828	465232	-	SSO0536	2972.46	1523.39	BOTH	1.95121
NC_002754	138497	139618	-	SSO0167	107.857	55.2971	BOTH	1.9505
NC_002754	2094540	2096369	+	SSO2285	162.371	316.546	BOTH	1.94951
NC_002754	1900584	1902404	-	SSO2088	151.979	296.232	BOTH	1.94916
NC_002754	934340	935677	-	SSO1077	214.202	109.903	BOTH	1.94901
NC_002754	925269	925568	+	SSO1068	8.63779	16.8308	BOTH	1.94851
NC_002754	435745	438549	+	SSO0504	27.5608	53.6819	BOTH	1.94776
NC_002754	609895	610611	-	SSO0716	404.181	787.179	BOTH	1.94759
NC_002754	136398	136799	+	SSO0164	453.806	883.693	BOTH	1.94729
NC_002754	697868	698608	+	SSO0813	129.509	251.748	BOTH	1.94387
NC_002754	2351776	2352945	-	SSO2583	115.097	223.701	BOTH	1.94359
NC_002754	2375511	2376764	-	SSO2609	43.9466	22.6146	BOTH	1.94329
NC_002754	1476858	1477508	-	SSO1625	11.1455	5.7374	BOTH	1.94261
NC_002754	1035783	1036424	-	SSO1192	21.2581	41.2635	BOTH	1.94107
NC_002754	66380	66835	-	SSO0082	3.59908	6.97743	BOTH	1.93867
NC_002754	2162590	2163129	-	SSO2370	113.251	219.287	BOTH	1.93629
NC_002754	860974	862209	+	SSO1004	164.509	318.529	BOTH	1.93624
NC_002754	739961	740287	-	SSO0866	184.643	95.3963	BOTH	1.93553
NC_002754	1986907	1989909	-	SSO2162	163.724	316.84	BOTH	1.93521
NC_002754	217690	218709	-	SSO0252	18.5458	35.8722	BOTH	1.93425
NC_002754	1841137	1841667	+	SSO2026	33.6727	65.1295	BOTH	1.93419
NC_002754	378187	378990	-	SSO0436	91.8571	177.651	BOTH	1.93399
NC_002754	1799863	1800333	+	SSO1988	1108.24	573.166	BOTH	1.93354
NC_002754	1633733	1634242	+	SSO1803	27.2683	14.1048	BOTH	1.93327
NC_002754	2650496	2650750	-	SSO11417	9.82336	18.9872	BOTH	1.93286
NC_002754	1030272	1031453	+	SSO1187	16.954	8.77761	BOTH	1.93151
NC_002754	490144	490731	+	SSO0556	130.889	252.791	BOTH	1.93134
NC_002754	2062387	2063406	-	SSO2248	88.4103	45.8405	BOTH	1.92865
NC_002754	131917	132345	+	SSO0157	46.3098	89.1601	BOTH	1.9253
NC_002754	2452659	2453570	-	SSO2700	58.2482	30.2608	BOTH	1.92487
NC_002754	1621977	1622483	+	SSO1788	14.8222	28.5129	BOTH	1.92365
NC_002754	2875393	2876634	+	SSO3125	16.0654	8.35357	BOTH	1.92318
NC_002754	965645	966097	+	SSO1118	66.9285	34.8128	BOTH	1.92253
NC_002754	2818966	2820033	+	SSO3063	1.21317	2.33149	BOTH	1.92181
NC_002754	2855307	2856095	+	SSO3103	1.09478	2.10396	BOTH	1.92181
NC_002754	2243888	2245726	+	SSO2473	0.23485	0.451338	BOTH	1.92181
NC_002754	2273466	2274935	-	SSO2505	1.46901	2.82317	BOTH	1.92181
NC_002754	2353036	2354019	-	SSO2585	376.323	722.815	BOTH	1.92073
NC_002754	1914354	1914725	+	SSO2096	43.1889	82.9267	BOTH	1.92009
NC_002754	1519238	1519717	+	SSO1664	49.4873	94.9613	BOTH	1.9189
NC_002754	2641293	2641598	+	SSO2887	36.4142	18.9872	BOTH	1.91783
NC_002754	618401	619867	+	SSO0725	18.9596	36.3519	BOTH	1.91734
NC_002754	945251	946060	+	SSO1090	1061.06	2034.38	BOTH	1.91731
NC_002754	125531	126319	-	SSO0149	85.2831	163.495	BOTH	1.91709
NC_002754	2363401	2364111	+	SSO2599	11.4199	21.8885	BOTH	1.9167
NC_002754	337472	338665	+	SSO0390	70907.2	37051.8	BOTH	1.91373
NC_002754	2348373	2348657	+	SSO10704	3039.59	5816.63	BOTH	1.91362
NC_002754	315002	315880	+	SSO0370	20.4398	39.1084	BOTH	1.91334
NC_002754	1673721	1674494	-	SSO1856	5.46837	2.85964	BOTH	1.91226
NC_002754	890439	891647	+	SSO1031	114.527	59.8995	BOTH	1.91199
NC_002754	2991448	2992245	+	SSO12256	32.6894	62.4935	BOTH	1.91174
NC_002754	2893927	2895045	+	SSO3144	14.2033	27.1354	BOTH	1.9105
NC_002754	1659285	1659863	-	SSO1830	31.3288	59.8497	BOTH	1.91037
NC_002754	2723876	2724787	-	SSO2981	9.85011	18.8087	BOTH	1.90949
NC_002754	176721	177188	+	SSO0203	1760.41	921.939	BOTH	1.90947
NC_002754	140169	140723	-	SSO0169	2370.64	1242.27	BOTH	1.90831
NC_002754	660962	661462	-	SSO0776	88.7916	169.398	BOTH	1.90782
NC_002754	1008947	1009840	-	SSO1170	89.9528	171.449	BOTH	1.90599
NC_002754	1420046	1420630	-	SSO1573	5.46321	10.4047	BOTH	1.9045
NC_002754	1528090	1529271	+	SSO1675	128.178	244.076	BOTH	1.90419
NC_002754	2539307	2540431	+	SSO2782	12.0545	6.33268	BOTH	1.90354
NC_002754	1005978	1006955	-	SSO1167	16.251	30.9062	BOTH	1.9018
NC_002754	402506	403264	+	SSO0467	50.5293	96.0509	BOTH	1.90089
NC_002754	2170481	2171119	+	SSO2384	30.8203	58.5597	BOTH	1.90004
NC_002754	1718631	1719182	-	SSO1902	22.8463	12.0291	BOTH	1.89925
NC_002754	1198519	1199217	+	SSO1363	69.0776	36.4144	BOTH	1.89698
NC_002754	2701002	2701235	-	SSO11549	15.1346	7.98087	BOTH	1.89636
NC_002754	2082335	2082589	+	SSO10122	10.1621	19.2584	BOTH	1.89512
NC_002754	2495135	2495668	-	SSO2741	7.60255	14.3775	BOTH	1.89115
NC_002754	2278488	2280146	+	SSO2510	52.2224	27.642	BOTH	1.88924
NC_002754	2181923	2184178	-	SSO2398	37.4457	70.7312	BOTH	1.8889
NC_002754	1573177	1574229	+	SSO1734	8.9413	16.8814	BOTH	1.88802
NC_002754	58397	58795	-	SSO0072	411.323	776.445	BOTH	1.88768
NC_002754	499646	500287	+	SSO0566	897.146	475.662	BOTH	1.8861
NC_002754	2205820	2206350	+	SSO2427	344.698	649.602	BOTH	1.88455
NC_002754	1083623	1084759	-	SSO1258	12.8389	6.81334	BOTH	1.88438
NC_002754	1355907	1356590	+	SSO1501	54.0493	101.83	BOTH	1.88402
NC_002754	2300632	2301045	+	SSO2532	175.885	331.303	BOTH	1.88363
NC_002754	2592469	2594226	-	SSO2831	24.0757	45.3248	BOTH	1.88259
NC_002754	1519887	1521248	+	SSO1665	13.445	25.2903	BOTH	1.88102
NC_002754	829584	829640	+	SSOs03	83.3471	156.537	BOTH	1.87814
NC_002754	373055	374035	+	SSO0429	176.982	332.371	BOTH	1.87799
NC_002754	745781	746833	-	SSO0874	481.272	903.382	BOTH	1.87707
NC_002754	651906	652583	+	SSO0766	118.993	223.315	BOTH	1.87672
NC_002754	2589587	2590462	-	SSO2829	244.047	130.045	BOTH	1.87664
NC_002754	17801	19660	+	SSO0018	22.1053	41.4262	BOTH	1.87404
NC_002754	683888	684199	+	SSO0800	1.66111	0.886764	BOTH	1.87323
NC_002754	2640862	2641086	-	SSO11387	4.60682	2.45929	BOTH	1.87323
NC_002754	1200831	1201349	+	SSO1366	4.49365	2.39888	BOTH	1.87323
NC_002754	1371297	1371623	-	SSO1518	28.5285	15.2296	BOTH	1.87323
NC_002754	1403475	1403714	+	SSO8351	3.23917	1.72919	BOTH	1.87323
NC_002754	1084762	1085925	-	SSO1259	18.0325	9.62642	BOTH	1.87323
NC_002754	2603721	2603882	+	SSO11277	12.7967	6.83137	BOTH	1.87323
NC_002754	10496	10651	+	SSO5023	14.95	7.98087	BOTH	1.87323
NC_002754	1023274	1023528	-	SSO7351	1.01621	0.542491	BOTH	1.87323
NC_002754	1074996	1075199	-	SSO7486	8.89184	4.74679	BOTH	1.87323
NC_002754	2052811	2053461	-	SSO2236	22.4237	41.968	BOTH	1.87159
NC_002754	1697510	1697749	-	SSO9135	8.63779	16.1391	BOTH	1.86843
NC_002754	2254375	2255388	-	SSO2483	1.02222	1.90995	BOTH	1.86843
NC_002754	2652595	2653731	+	SSO2900	6.38148	11.9233	BOTH	1.86843
NC_002754	1420804	1421211	-	SSO1574	282.21	151.05	BOTH	1.86832
NC_002754	2638613	2639527	-	SSO2885	73.256	39.2328	BOTH	1.86721
NC_002754	430925	432187	-	SSO0499	33.7852	63.034	BOTH	1.86573
NC_002754	720549	721523	+	SSO0840	83.4543	155.645	BOTH	1.86503
NC_002754	1351270	1352472	+	SSO1498	16.8017	31.3353	BOTH	1.86501
NC_002754	1038738	1039328	+	SSO1196	18.7079	34.8764	BOTH	1.86426
NC_002754	785043	786044	+	SSO0923	47.0682	87.7365	BOTH	1.86403
NC_002754	2104400	2104804	-	SSO2295	56.7321	105.545	BOTH	1.8604
NC_002754	1782460	1782846	-	SSO1968	22.0967	41.1073	BOTH	1.86034
NC_002754	507602	509320	-	SSO0579	108.688	58.4645	BOTH	1.85905
NC_002754	1494297	1494686	-	SSO1641	11.517	6.20735	BOTH	1.85539
NC_002754	1971907	1972302	-	SSO2144	22.0307	11.8773	BOTH	1.85487
NC_002754	1467986	1469011	-	SSO1619	18.6058	10.0448	BOTH	1.85228
NC_002754	2194143	2194559	+	SSO2412	39.1497	72.485	BOTH	1.85148
NC_002754	1143417	1145006	+	SSO1314	17.0583	31.5387	BOTH	1.84888
NC_002754	1779715	1780665	-	SSO1966	16.5308	30.5472	BOTH	1.8479
NC_002754	1727019	1728281	+	SSO1907	924.989	1707.01	BOTH	1.84544
NC_002754	1769353	1770303	-	SSO1951	15.2592	28.1471	BOTH	1.8446
NC_002754	2042766	2043119	-	SSO2221	29.7686	54.9042	BOTH	1.84436
NC_002754	2084231	2084881	+	SSO2275	143.698	264.452	BOTH	1.84033
NC_002754	2371900	2373165	+	SSO2606	16.102	29.612	BOTH	1.83902
NC_002754	2693485	2693937	-	SSO2949	29.174	15.8795	BOTH	1.83721
NC_002754	1827013	1827495	+	SSO2012	168.642	309.75	BOTH	1.83673
NC_002754	1465989	1466684	+	SSO1617	26.6828	48.9937	BOTH	1.83615
NC_002754	77945	78065	-	SSOr02	226.296	123.473	BOTH	1.83276
NC_002754	2990967	2991218	-	SSO12252	366.078	199.817	BOTH	1.83206
NC_002754	1061044	1061850	+	SSO1221	2.35479	1.28564	BOTH	1.8316
NC_002754	1876243	1876875	+	SSO2058	95.2476	52.0123	BOTH	1.83125
NC_002754	380199	380588	-	SSO0438	196.233	359.139	BOTH	1.83017
NC_002754	1584094	1584663	+	SSO1748	12.8809	7.0381	BOTH	1.83017
NC_002754	2215993	2217270	+	SSO2440	32.7803	59.9669	BOTH	1.82936
NC_002754	1882843	1883277	+	SSO2064	164.614	89.9974	BOTH	1.8291
NC_002754	31267	31734	+	SSO0036	11.0741	20.2478	BOTH	1.82839
NC_002754	460955	462184	-	SSO0531	33.4978	61.2386	BOTH	1.82814
NC_002754	443596	444333	-	SSO0512	18.8439	10.3095	BOTH	1.82782
NC_002754	59853	61151	-	SSO0076	13.2326	24.174	BOTH	1.82685
NC_002754	933741	934313	+	SSO1076	214.965	117.694	BOTH	1.82648
NC_002754	1455422	1455709	+	SSO8475	90.8767	165.954	BOTH	1.82615
NC_002754	295940	296596	-	SSO0345	291.213	159.496	BOTH	1.82583
NC_002754	1347608	1347931	-	SSO1493	11.4637	20.9211	BOTH	1.82498
NC_002754	1993637	1994308	-	SSO2169	64.0122	116.72	BOTH	1.82341
NC_002754	1437080	1437778	+	SSO1591	37.9371	69.1676	BOTH	1.82322
NC_002754	258056	259051	+	SSO0304	58.4525	106.39	BOTH	1.82012
NC_002754	841379	842476	-	SSO0985	67.5761	122.965	BOTH	1.81965
NC_002754	561606	562142	-	SSO0648	24.9322	45.3389	BOTH	1.81849
NC_002754	634524	635147	-	SSO0748	148.531	81.6931	BOTH	1.81816
NC_002754	2122901	2123659	-	SSO2322	24.3542	13.3961	BOTH	1.81801
NC_002754	1968668	1970377	-	SSO2141	148.055	268.945	BOTH	1.81652
NC_002754	2060221	2060892	+	SSO2246	570.197	1035.04	BOTH	1.81524
NC_002754	1847556	1848455	+	SSO2033	26.9691	48.9553	BOTH	1.81524
NC_002754	635111	635695	-	SSO0749	458.024	252.432	BOTH	1.81444
NC_002754	1660613	1660981	-	SSO1832	42.1355	23.2433	BOTH	1.8128
NC_002754	717064	718473	+	SSO0837	29.8341	54.0586	BOTH	1.81198
NC_002754	1189954	1191945	-	SSO1353	33.866	61.355	BOTH	1.8117
NC_002754	1213832	1214791	-	SSO1377	18.2653	10.0869	BOTH	1.81079
NC_002754	1056421	1057008	-	SSO1217	4.26013	2.35264	BOTH	1.81079
NC_002754	1940056	1940829	-	SSO2116	14.9543	27.0772	BOTH	1.81066
NC_002754	2146765	2147961	+	SSO2353	1084.16	1962.98	BOTH	1.8106
NC_002754	1065792	1066598	+	SSO1227	1562.94	863.523	BOTH	1.80995
NC_002754	1545396	1546784	+	SSO1693	163.739	90.4806	BOTH	1.80966
NC_002754	1341997	1342947	+	SSO1484	17.1666	31.0563	BOTH	1.80912
NC_002754	566143	566694	+	SSO0655	24.2547	43.8563	BOTH	1.80816
NC_002754	2589077	2589493	-	SSO2828	97.1492	53.7417	BOTH	1.80771
NC_002754	371931	372701	+	SSO0427	27.4482	49.6105	BOTH	1.80742
NC_002754	2665268	2666206	-	SSO2915	18.3059	33.0737	BOTH	1.80673
NC_002754	1800334	1801737	+	SSO1989	417.185	230.953	BOTH	1.80637
NC_002754	1936374	1937183	+	SSO2112	89.7903	161.989	BOTH	1.80408
NC_002754	1921900	1922232	-	SSO2100	13.4884	7.47758	BOTH	1.80385
NC_002754	86950	87813	-	SSO0106	143.463	258.738	BOTH	1.80351
NC_002754	21513	22064	+	SSO0021	76.989	138.711	BOTH	1.8017
NC_002754	1252229	1252534	-	SSO1404	15.8077	28.4808	BOTH	1.8017
NC_002754	601227	601661	-	SSO0696	1691.22	3044.96	BOTH	1.80045
NC_002754	2040871	2041620	-	SSO2219	17.6211	31.7249	BOTH	1.80039
NC_002754	410443	412068	-	SSO0477	51.2105	28.4582	BOTH	1.7995
NC_002754	1047021	1047593	-	SSO1208	50.9524	91.6199	BOTH	1.79815
NC_002754	304893	305294	+	SSO0359	831.548	1495.19	BOTH	1.79808
NC_002754	318365	319240	-	SSO0375	22.6791	40.7425	BOTH	1.79648
NC_002754	2580109	2581296	+	SSO2819	234.922	421.759	BOTH	1.79532
NC_002754	2361442	2362596	-	SSO2597	99.2411	178.159	BOTH	1.79521
NC_002754	666288	666677	-	SSO0783	73.5319	40.9685	BOTH	1.79484
NC_002754	2581293	2581580	+	SSO11231	511.969	918.392	BOTH	1.79384
NC_002754	187602	188081	+	SSO0218	96.0954	172.343	BOTH	1.79345
NC_002754	2815262	2816473	-	SSO3060	9.26495	16.6071	BOTH	1.79246
NC_002754	1406046	1406915	+	SSO1560	55.8974	100.174	BOTH	1.7921
NC_002754	1806774	1807262	-	SSO1993	50.5196	90.5261	BOTH	1.7919
NC_002754	2135271	2135543	+	SSO10237	54.4212	30.4033	BOTH	1.78998
NC_002754	1321632	1322885	-	SSO1463	7.78365	13.8997	BOTH	1.78576
NC_002754	2730188	2730796	-	SSO2987	37.1609	66.3282	BOTH	1.78489
NC_002754	229516	229998	-	SSO0267	53.472	95.3739	BOTH	1.78362
NC_002754	1886722	1888548	+	SSO2070	52.621	93.8514	BOTH	1.78353
NC_002754	308410	309468	+	SSO0363	59.6244	106.331	BOTH	1.78335
NC_002754	2503123	2504163	-	SSO2749	76.7527	136.873	BOTH	1.7833
NC_002754	952759	953226	+	SSO1098	233.848	131.241	BOTH	1.78182
NC_002754	2528877	2529503	+	SSO2772	38.1606	67.9541	BOTH	1.78074
NC_002754	2311926	2312876	+	SSO2542	17.8932	31.8564	BOTH	1.78036
NC_002754	1449400	1449636	-	SSO8459	3.28017	5.83693	BOTH	1.77946
NC_002754	1967022	1968209	+	SSO2139	16.8684	29.9843	BOTH	1.77754
NC_002754	606655	607014	-	SSO0707	360.867	640.761	BOTH	1.77561
NC_002754	235569	236009	-	SSO0276	27.0298	47.9938	BOTH	1.77559
NC_002754	500806	502251	+	SSO0569	75.8644	134.604	BOTH	1.77427
NC_002754	924674	925195	-	SSO1067	1549.51	873.34	BOTH	1.77423
NC_002754	236451	237041	-	SSO0278	308.826	547.255	BOTH	1.77205
NC_002754	2901511	2902590	+	SSO3149	44.9485	79.6068	BOTH	1.77107
NC_002754	2712484	2712930	-	SSO2968	48.6962	86.1887	BOTH	1.76992
NC_002754	2351114	2351713	-	SSO2582	100.63	177.991	BOTH	1.76877
NC_002754	321348	322277	-	SSO0378	20.9907	37.1125	BOTH	1.76804
NC_002754	2600826	2601863	+	SSO2841	7.65584	13.527	BOTH	1.76689
NC_002754	1970712	1971041	-	SSO2142	48.6857	85.9355	BOTH	1.76511
NC_002754	1626062	1626556	-	SSO1794	46.5917	26.4094	BOTH	1.76421
NC_002754	1794085	1796007	+	SSO1983	1.07804	0.611466	BOTH	1.76304
NC_002754	1925542	1925880	+	SSO2103	6.11525	3.46858	BOTH	1.76304
NC_002754	449346	449660	-	SSO0521	153.286	270.083	BOTH	1.76195
NC_002754	111001	111396	-	SSO0132	3.27189	5.76396	BOTH	1.76166
NC_002754	797721	798959	+	SSO0939	104.086	59.119	BOTH	1.76061
NC_002754	1302692	1303219	-	SSO1449	5.07143	2.88198	BOTH	1.7597
NC_002754	2964929	2965630	-	SSO3217	28.9157	50.8411	BOTH	1.75826
NC_002754	2816503	2816748	-	SSO11867	14.3963	25.3052	BOTH	1.75776
NC_002754	2654425	2654766	-	SSO2902	11.3655	6.47182	BOTH	1.75615
NC_002754	1893970	1894848	-	SSO2078	5.10995	8.97054	BOTH	1.7555
NC_002754	2061575	2062390	+	SSO2247	103.632	181.904	BOTH	1.75528
NC_002754	456948	458195	+	SSO0527	122.438	214.819	BOTH	1.75451
NC_002754	1837866	1838174	+	SSO2024	5.87034	10.2968	BOTH	1.75404
NC_002754	2447407	2447808	+	SSO2691	30.5116	53.5102	BOTH	1.75377
NC_002754	466421	466963	-	SSO0538	25.1339	44.0736	BOTH	1.75355
NC_002754	2888776	2890428	-	SSO3140	57.7943	101.345	BOTH	1.75355
NC_002754	2430019	2431206	+	SSO2673	20.5765	36.0393	BOTH	1.75148
NC_002754	189372	190559	-	SSO0223	177.482	310.672	BOTH	1.75044
NC_002754	2738911	2740170	-	SSO2998	57.7223	32.9918	BOTH	1.74959
NC_002754	2138337	2138969	-	SSO2342	219.424	383.864	BOTH	1.74941
NC_002754	1645053	1646012	-	SSO1814	30.9521	17.7242	BOTH	1.74632
NC_002754	964453	965712	-	SSO1119	435.797	760.843	BOTH	1.74587
NC_002754	1603595	1604332	-	SSO1772	40.4969	70.6671	BOTH	1.745
NC_002754	547921	549135	+	SSO0633	29.077	50.7229	BOTH	1.74443
NC_002754	1820893	1821762	+	SSO2004	6.15566	10.7329	BOTH	1.74358
NC_002754	988438	989463	-	SSO1148	73.7495	128.56	BOTH	1.7432
NC_002754	754612	755694	-	SSO0886	78.6413	137.058	BOTH	1.74282
NC_002754	2184930	2185730	+	SSO2399	44.2134	77.0256	BOTH	1.74213
NC_002754	2098820	2099599	+	SSO2289	20.8193	36.2686	BOTH	1.74207
NC_002754	2645761	2646066	-	SSO2893	25.9698	14.9185	BOTH	1.74078
NC_002754	165619	166320	-	SSO0192	439.395	764.785	BOTH	1.74054
NC_002754	2421630	2422811	-	SSO2665	60.6545	105.565	BOTH	1.74044
NC_002754	1934808	1935950	-	SSO2111	105.951	60.8772	BOTH	1.7404
NC_002754	393598	394158	+	SSO0455	125.487	218.353	BOTH	1.74005
NC_002754	1418932	1419897	+	SSO1572	6.34868	3.6517	BOTH	1.73855
NC_002754	1246615	1247103	+	SSO1398	414.578	720.672	BOTH	1.73833
NC_002754	2668480	2669973	+	SSO2921	19.0216	33.056	BOTH	1.73781
NC_002754	178048	179415	-	SSO0207	214.619	372.939	BOTH	1.73768
NC_002754	881608	882783	-	SSO1023	13.0742	7.52844	BOTH	1.73664
NC_002754	134541	135581	+	SSO0162	41.4049	23.8532	BOTH	1.73583
NC_002754	1504337	1505563	+	SSO1652	11.5452	6.65181	BOTH	1.73565
NC_002754	1614979	1616013	-	SSO1782	1.50222	2.60631	BOTH	1.73497
NC_002754	1616016	1616639	-	SSO1783	1.66111	2.88198	BOTH	1.73497
NC_002754	361016	361558	+	SSO0415	129.328	224.317	BOTH	1.73448
NC_002754	1003829	1004641	-	SSO1163	5.31229	3.06277	BOTH	1.73447
NC_002754	2120086	2120790	-	SSO2318	3.06304	1.76598	BOTH	1.73447
NC_002754	1078983	1079435	+	SSO1253	174.09	100.469	BOTH	1.73279
NC_002754	2737693	2738847	+	SSO2996	72.6172	125.819	BOTH	1.73263
NC_002754	903948	904832	-	SSO1045	44.2138	76.5923	BOTH	1.73232
NC_002754	638014	638754	-	SSO0754	15.0374	26.0429	BOTH	1.73187
NC_002754	2418081	2419055	+	SSO2660	4265.12	7386.03	BOTH	1.73173
NC_002754	526402	527775	+	SSO0602	223.866	387.419	BOTH	1.73059
NC_002754	2319642	2319944	-	SSO2550	186.439	107.746	BOTH	1.73036
NC_002754	1763430	1763837	+	SSO1945	3.81079	2.20387	BOTH	1.72914
NC_002754	2315129	2315824	+	SSO2546	97.5474	56.4471	BOTH	1.72812
NC_002754	394148	394873	+	SSO0456	206.426	119.471	BOTH	1.72783
NC_002754	416431	416748	+	SSO0483	447.372	772.371	BOTH	1.72646
NC_002754	1585110	1585568	-	SSO1750	8.46842	14.6171	BOTH	1.72607
NC_002754	816731	817033	-	SSO0962	14315.1	24690.8	BOTH	1.72481
NC_002754	310168	311073	+	SSO0365	51.0068	87.9482	BOTH	1.72424
NC_002754	84916	85734	-	SSO0103	153.244	88.9297	BOTH	1.72321
NC_002754	1400951	1401979	-	SSO1552	108.035	62.7146	BOTH	1.72265
NC_002754	687582	687905	+	SSO0803	10.6639	6.19093	BOTH	1.72251
NC_002754	2927727	2928887	-	SSO3181	58.1804	100.087	BOTH	1.72029
NC_002754	1439908	1441335	+	SSO1595	18.0256	30.9995	BOTH	1.71974
NC_002754	1883264	1884178	-	SSO2066	50.0331	29.1033	BOTH	1.71915
NC_002754	456133	456918	+	SSO0526	31.1004	53.4157	BOTH	1.71752
NC_002754	946071	947213	+	SSO1091	386.773	664.263	BOTH	1.71745
NC_002754	1738904	1739230	+	SSO1919	11.6227	6.76869	BOTH	1.71713
NC_002754	2953037	2955046	-	SSO3207	46.1971	79.319	BOTH	1.71697
NC_002754	783840	784595	+	SSO0921	161.559	277.219	BOTH	1.71591
NC_002754	424521	425558	+	SSO0493	19.8053	33.9841	BOTH	1.71591
NC_002754	2467764	2469173	+	SSO2716	355.436	609.754	BOTH	1.71551
NC_002754	2506488	2507654	-	SSO2752	7.91982	13.5727	BOTH	1.71377
NC_002754	831406	832518	+	SSO0972	26.6196	15.5363	BOTH	1.71338
NC_002754	2040411	2040887	-	SSO2218	44.1849	25.811	BOTH	1.71187
NC_002754	451340	451531	-	SSO6024	22.9441	39.267	BOTH	1.71142
NC_002754	2450948	2452078	+	SSO2697	15.6565	26.7864	BOTH	1.71088
NC_002754	1629186	1629626	-	SSO1800	20.1744	34.5054	BOTH	1.71035
NC_002754	2301034	2302002	-	SSO2534	49.206	84.1575	BOTH	1.71031
NC_002754	2145846	2146082	-	SSO10258	56.4918	96.6011	BOTH	1.71
NC_002754	2907619	2908212	+	SSO3155	1019.38	596.658	BOTH	1.70848
NC_002754	2909237	2910094	+	SSO3158	56.6792	33.2133	BOTH	1.70652
NC_002754	1597288	1598331	-	SSO1763	15.2237	25.971	BOTH	1.70596
NC_002754	976191	976706	+	SSO1137	10.3787	17.694	BOTH	1.70484
NC_002754	315925	316908	+	SSO0371	15.0986	25.727	BOTH	1.70393
NC_002754	1121211	1121786	-	SSO1292	389.3	662.976	BOTH	1.70299
NC_002754	940121	940585	-	SSO1082	63.158	107.544	BOTH	1.70278
NC_002754	1535774	1536145	+	SSO1682	1.85759	3.16088	BOTH	1.70161
NC_002754	914084	915613	+	SSO1054	52.5042	89.3302	BOTH	1.70139
NC_002754	250020	250589	-	SSO0292	203.064	345.474	BOTH	1.70131
NC_002754	488848	489288	-	SSO0553	244.443	415.633	BOTH	1.70032
NC_002754	1186104	1186691	-	SSO1349	7.19815	4.23475	BOTH	1.69978
NC_002754	103509	104171	-	SSO0123	62.4057	105.994	BOTH	1.69847
NC_002754	1373676	1374218	+	SSO1521	5.40856	3.18451	BOTH	1.6984
NC_002754	1417062	1418666	-	SSO1571	3.12144	5.30069	BOTH	1.69815
NC_002754	272869	274047	-	SSO0320	161.034	273.444	BOTH	1.69805
NC_002754	2314425	2315126	+	SSO2545	194.658	114.787	BOTH	1.69582
NC_002754	1628412	1628729	+	SSO1798	5.16094	3.04511	BOTH	1.69483
NC_002754	1304394	1305242	-	SSO1451	1.93307	1.14057	BOTH	1.69483
NC_002754	2626555	2627742	-	SSO2874	109.426	64.568	BOTH	1.69475
NC_002754	1153789	1155090	-	SSO1324	52.4769	88.9297	BOTH	1.69465
NC_002754	2632768	2633439	+	SSO2880	64.5263	38.0833	BOTH	1.69435
NC_002754	1687137	1687514	-	SSO1872	7.99795	13.5407	BOTH	1.69303
NC_002754	909102	909272	+	SSO7115	362.686	214.379	BOTH	1.6918
NC_002754	2514624	2515853	-	SSO2759	455.204	269.079	BOTH	1.69171
NC_002754	1338701	1339660	-	SSO1481	15.476	9.15029	BOTH	1.69132
NC_002754	1944279	1945244	+	SSO2120	5.81217	3.4369	BOTH	1.69111
NC_002754	2967851	2968612	-	SSO3219	19.2707	32.5868	BOTH	1.69101
NC_002754	443033	443440	+	SSO0509	99.5039	168.172	BOTH	1.69011
NC_002754	1836633	1837319	+	SSO2023	16.0937	27.1838	BOTH	1.68909
NC_002754	1118643	1119617	+	SSO1290	17.9843	30.3628	BOTH	1.68829
NC_002754	1482200	1483252	-	SSO1631	40.1128	23.7784	BOTH	1.68694
NC_002754	1492953	1493198	+	SSO8568	16.8542	28.3981	BOTH	1.68492
NC_002754	4500	5348	+	SSO0008	469.025	278.544	BOTH	1.68384
NC_002754	2205318	2205746	+	SSO2426	23.5576	39.6625	BOTH	1.68364
NC_002754	1621252	1621977	+	SSO1787	64.248	38.2041	BOTH	1.6817
NC_002754	628750	629181	-	SSO0739	67.5827	40.1876	BOTH	1.68168
NC_002754	1722738	1722962	+	SSO9201	3.83902	6.45564	BOTH	1.68159
NC_002754	1699694	1700038	+	SSO1884	5.00741	8.4204	BOTH	1.68159
NC_002754	2460253	2460654	-	SSO2707	132.79	78.9749	BOTH	1.68142
NC_002754	418707	419693	+	SSO0486	1100.51	654.534	BOTH	1.68136
NC_002754	560615	561589	+	SSO0647	15.1493	25.4679	BOTH	1.68112
NC_002754	2519626	2520489	-	SSO2762	118.27	70.4485	BOTH	1.67881
NC_002754	177200	177619	-	SSO0205	4941.64	8295.99	BOTH	1.67879
NC_002754	2110381	2111379	-	SSO2308	234.405	393.473	BOTH	1.6786
NC_002754	1700448	1701320	+	SSO1885	62.9282	105.613	BOTH	1.67831
NC_002754	657259	657777	-	SSO0773	7.15655	4.26467	BOTH	1.6781
NC_002754	2977559	2978956	-	SSO3233	15.6938	26.3213	BOTH	1.67717
NC_002754	2194603	2195046	-	SSO2413	66.7288	111.852	BOTH	1.67622
NC_002754	2979726	2980643	+	SSO3235	4.04602	6.78114	BOTH	1.676
NC_002754	361738	362277	+	SSO0416	48.4676	81.2079	BOTH	1.67551
NC_002754	1895792	1896118	+	SSO2080	75.8118	45.2656	BOTH	1.67482
NC_002754	2725126	2726088	+	SSO2982	55.0737	92.0798	BOTH	1.67194
NC_002754	2404133	2404567	+	SSO2642	1733.51	2896.93	BOTH	1.67113
NC_002754	2394008	2395165	+	SSO2629	802.911	1341.24	BOTH	1.67047
NC_002754	375411	375989	-	SSO0432	45.7997	76.4547	BOTH	1.66933
NC_002754	1405449	1405745	+	SSO8359	65.7286	109.69	BOTH	1.66883
NC_002754	2734689	2735147	+	SSO2992	29.169	48.6735	BOTH	1.66867
NC_002754	635752	636378	-	SSO0750	318.234	190.735	BOTH	1.66846
NC_002754	2615380	2615796	-	SSO2857	77.6779	129.544	BOTH	1.66771
NC_002754	908305	909105	+	SSO1050	188.284	313.974	BOTH	1.66755
NC_002754	2940120	2941649	-	SSO3194	175.296	105.153	BOTH	1.66706
NC_002754	1675627	1676370	-	SSO1858	88.932	53.3632	BOTH	1.66654
NC_002754	2364144	2364893	+	SSO2600	108.145	180.205	BOTH	1.66632
NC_002754	357792	358250	+	SSO0408	361.131	601.562	BOTH	1.66577
NC_002754	389485	390195	-	SSO0450	139.468	232.31	BOTH	1.66568
NC_002754	2582577	2583350	-	SSO2821	30.8014	18.4983	BOTH	1.66509
NC_002754	665401	666081	+	SSO0782	22.3238	13.4069	BOTH	1.66509
NC_002754	2825729	2826844	+	SSO3069	0.309598	0.185934	BOTH	1.66509
NC_002754	1226887	1227144	-	SSO7893	4.01757	2.41282	BOTH	1.66509
NC_002754	2735717	2736394	+	SSO2994	30.5762	50.9065	BOTH	1.6649
NC_002754	867403	868398	-	SSO1010	27.9254	46.4589	BOTH	1.66368
NC_002754	1789959	1790714	+	SSO1978	1.48533	2.47027	BOTH	1.66311
NC_002754	1808762	1809634	+	SSO1995	1.28627	2.1392	BOTH	1.66311
NC_002754	2703472	2703819	+	SSO2959	3.22676	5.36645	BOTH	1.66311
NC_002754	1312127	1312546	-	SSO1456	30.0266	49.8995	BOTH	1.66184
NC_002754	740476	741216	-	SSO0867	19.2339	11.5746	BOTH	1.66174
NC_002754	974538	975455	+	SSO1135	275.882	458.405	BOTH	1.6616
NC_002754	2373162	2373743	-	SSO2607	21.5203	12.9541	BOTH	1.66127
NC_002754	2193240	2193617	-	SSO2410	149.676	248.491	BOTH	1.66019
NC_002754	275795	276304	+	SSO0323	806.871	1338.87	BOTH	1.65933
NC_002754	225253	226020	-	SSO0259	31.1545	51.6956	BOTH	1.65933
NC_002754	662543	663625	+	SSO0779	14.1969	8.55813	BOTH	1.65888
NC_002754	1906371	1906922	+	SSO2092	109.381	181.314	BOTH	1.65764
NC_002754	2581577	2582515	-	SSO2820	193.637	320.941	BOTH	1.65743
NC_002754	2930867	2931259	-	SSO3183	139.347	230.911	BOTH	1.65708
NC_002754	341941	342501	-	SSO0392	51.8883	31.3165	BOTH	1.6569
NC_002754	2349524	2349904	+	SSO2579	29.9262	49.561	BOTH	1.65611
NC_002754	2740216	2741835	-	SSO3000	994.625	601.288	BOTH	1.65416
NC_002754	1225212	1225805	+	SSO1385	13.3784	22.1243	BOTH	1.65373
NC_002754	690131	690535	-	SSO0805	20.0482	12.1257	BOTH	1.65337
NC_002754	2497535	2498728	+	SSO2743	33.2779	54.9749	BOTH	1.65199
NC_002754	2920754	2921149	+	SSO3174	132.402	218.507	BOTH	1.65032
NC_002754	2644191	2645294	-	SSO2892	130.349	79.0039	BOTH	1.64991
NC_002754	993328	994557	+	SSO1152	1621.38	983.361	BOTH	1.64881
NC_002754	664160	664516	-	SSO0781	222.356	366.569	BOTH	1.64856
NC_002754	416732	417616	+	SSO0484	100.725	166.002	BOTH	1.64807
NC_002754	297116	297589	-	SSO0347	123.006	74.7127	BOTH	1.64639
NC_002754	1389059	1389868	+	SSO1537	17.1689	28.2648	BOTH	1.64627
NC_002754	2149579	2149869	+	SSO10269	53.4296	87.945	BOTH	1.646
NC_002754	1653996	1655258	-	SSO1824	82.0692	135.049	BOTH	1.64555
NC_002754	2533409	2534632	-	SSO2776	55.6798	91.6018	BOTH	1.64515
NC_002754	966613	966981	-	SSO1121	44.9446	73.8537	BOTH	1.64322
NC_002754	504260	505792	+	SSO0572	215.804	354.501	BOTH	1.6427
NC_002754	271082	272167	+	SSO0317	578.239	949.175	BOTH	1.64149
NC_002754	2428073	2429161	+	SSO2670	22.5265	36.9656	BOTH	1.64099
NC_002754	475014	475874	-	SSO0545	34.6113	56.7961	BOTH	1.64097
NC_002754	2343119	2343841	-	SSO2571	16.0092	9.75808	BOTH	1.64061
NC_002754	155103	155984	+	SSO0183	30.4575	49.9544	BOTH	1.64013
NC_002754	27944	28660	+	SSO0031	89.3896	54.5044	BOTH	1.64004
NC_002754	434783	435706	+	SSO0503	186.965	306.463	BOTH	1.63915
NC_002754	2206949	2208520	+	SSO2429	103.412	169.399	BOTH	1.6381
NC_002754	2988756	2989226	+	SSO3248	49.3326	80.7689	BOTH	1.63723
NC_002754	979183	982992	-	SSO1141	764.931	1252.08	BOTH	1.63685
NC_002754	1050458	1050913	-	SSO1210	41.4841	67.8024	BOTH	1.63442
NC_002754	2356224	2356652	+	SSO2588	1194.99	1950.24	BOTH	1.632
NC_002754	288531	289544	-	SSO0335	74.5371	121.555	BOTH	1.6308
NC_002754	2609154	2610017	+	SSO2849	417.393	256.016	BOTH	1.63034
NC_002754	359364	360611	+	SSO0412	334.022	544.528	BOTH	1.63022
NC_002754	569181	569582	-	SSO0659	57.8001	94.1161	BOTH	1.6283
NC_002754	2435615	2436109	-	SSO2677	500.119	307.551	BOTH	1.62613
NC_002754	277514	278572	+	SSO0325	778.543	1265.92	BOTH	1.62601
NC_002754	279779	283225	+	SSO0328	243.021	395.08	BOTH	1.6257
NC_002754	1710446	1711084	-	SSO1896	24.3318	39.5089	BOTH	1.62375
NC_002754	1068109	1068513	+	SSO1230	2.77262	1.70784	BOTH	1.62347
NC_002754	1071441	1072424	+	SSO1238	126.407	77.8838	BOTH	1.62302
NC_002754	1280804	1282480	+	SSO1428	61.6543	100.06	BOTH	1.62292
NC_002754	333735	337430	+	SSO0389	27711.8	44969.7	BOTH	1.62276
NC_002754	2939133	2940071	-	SSO3192	14.0743	22.8349	BOTH	1.62245
NC_002754	1226116	1226862	-	SSO1386	21.1608	34.2597	BOTH	1.61901
NC_002754	2708912	2709121	-	SSO11575	114.348	185.106	BOTH	1.61879
NC_002754	2010928	2011773	+	SSO2186	1838.85	1135.95	BOTH	1.61877
NC_002754	1773174	1773713	-	SSO1956	14.8762	24.0806	BOTH	1.61873
NC_002754	2686213	2687079	-	SSO2941	4.78217	7.73847	BOTH	1.61819
NC_002754	343869	346610	-	SSO0394	40.2278	65.0811	BOTH	1.61782
NC_002754	202755	203297	+	SSO0234	47.5635	29.4249	BOTH	1.61644
NC_002754	1422717	1424012	-	SSO1578	685.824	1107.38	BOTH	1.61466
NC_002754	735135	735338	+	SSO6687	381.502	236.323	BOTH	1.61433
NC_002754	767419	767742	+	SSO0901	215.945	133.852	BOTH	1.61331
NC_002754	1364187	1364927	-	SSO1510	80.0831	49.6588	BOTH	1.61267
NC_002754	1035182	1035808	-	SSO1191	12.261	19.7464	BOTH	1.61051
NC_002754	838169	839233	-	SSO0980	27.0894	16.821	BOTH	1.61045
NC_002754	1072414	1072989	+	SSO1240	41.0895	66.1655	BOTH	1.61028
NC_002754	2466033	2467679	+	SSO2714	167.931	104.36	BOTH	1.60914
NC_002754	1224793	1225251	+	SSO1384	22.7706	36.6181	BOTH	1.60813
NC_002754	768805	769428	+	SSO0904	53.8477	86.5703	BOTH	1.60769
NC_002754	2302377	2303117	+	SSO2535	21.4488	13.3481	BOTH	1.60687
NC_002754	2048608	2049474	-	SSO2229	105.307	169.129	BOTH	1.60606
NC_002754	2486527	2487444	-	SSO2732	35.0028	56.2081	BOTH	1.60582
NC_002754	1469360	1470577	-	SSO1620	12.7652	7.9503	BOTH	1.60563
NC_002754	988135	988437	+	SSO1147	60.7211	97.4738	BOTH	1.60527
NC_002754	624699	624920	-	SSO6418	1561.03	2505.61	BOTH	1.6051
NC_002754	957883	958260	+	SSO1108	420.464	674.841	BOTH	1.60499
NC_002754	1177035	1178246	+	SSO1341	37.915	23.6265	BOTH	1.60476
NC_002754	2933310	2933801	-	SSO3186	273.881	439.327	BOTH	1.60408
NC_002754	2476622	2476876	+	SSO10982	0.677473	1.08498	BOTH	1.60151
NC_002754	284612	285646	+	SSO0330	145.465	232.964	BOTH	1.60151
NC_002754	708600	709052	-	SSO0827	0.572039	0.916127	BOTH	1.60151
NC_002754	2594590	2595291	+	SSO2832	27.8083	44.5352	BOTH	1.60151
NC_002754	1435333	1435554	+	SSO8426	9.33815	14.9552	BOTH	1.60151
NC_002754	1453925	1454182	+	SSO8469	9.03954	14.4769	BOTH	1.60151
NC_002754	1536846	1537022	-	SSO8685	5.36812	8.5971	BOTH	1.60151
NC_002754	1792068	1792358	+	SSO9407	0.296831	0.475379	BOTH	1.60151
NC_002754	824180	825628	+	SSO0966	130.133	208.266	BOTH	1.60041
NC_002754	767033	767422	+	SSO0900	398.224	249.181	BOTH	1.59813
NC_002754	733203	735080	-	SSO0857	50.5021	80.6218	BOTH	1.59641
NC_002754	2504398	2505747	-	SSO2750	30.9041	49.2883	BOTH	1.59488
NC_002754	24484	25713	+	SSO0026	82.3048	131.25	BOTH	1.59468
NC_002754	127806	129608	+	SSO0152	161.018	256.76	BOTH	1.5946
NC_002754	1264838	1265626	+	SSO1410	12.152	19.3739	BOTH	1.5943
NC_002754	2344828	2345217	-	SSO2573	95.6801	60.1226	BOTH	1.59142
NC_002754	2719813	2720220	+	SSO2976	48.4817	77.1354	BOTH	1.59102
NC_002754	1047747	1049813	+	SSO1209	64.0207	40.2557	BOTH	1.59035
NC_002754	652597	653070	+	SSO0767	247.835	155.846	BOTH	1.59026
NC_002754	2684189	2684917	-	SSO2939	24.2901	15.2757	BOTH	1.59011
NC_002754	770599	771720	+	SSO0906	760.849	478.625	BOTH	1.58966
NC_002754	2275200	2275796	+	SSO2506	292.556	465.056	BOTH	1.58963
NC_002754	2986787	2987929	+	SSO3245	190.288	119.757	BOTH	1.58895
NC_002754	844856	846199	-	SSO0988	20.1163	31.9591	BOTH	1.58872
NC_002754	2164305	2164847	+	SSO2372	145.236	230.686	BOTH	1.58836
NC_002754	80426	81109	+	SSO0099	1240.99	1971.07	BOTH	1.58831
NC_002754	958736	959071	-	SSO1110	1322.92	2099.94	BOTH	1.58735
NC_002754	572859	573935	-	SSO0664	58.5477	92.9299	BOTH	1.58725
NC_002754	262008	262835	+	SSO0308	38.8074	61.5658	BOTH	1.58644
NC_002754	1955003	1956094	+	SSO2128	3.71773	2.34359	BOTH	1.58634
NC_002754	59335	59832	-	SSO0074	332.85	527.785	BOTH	1.58566
NC_002754	2474669	2475163	+	SSO2721	5.75852	3.63304	BOTH	1.58504
NC_002754	2923351	2923839	+	SSO3177	549.356	346.687	BOTH	1.58459
NC_002754	1825283	1826815	+	SSO2010	105.761	167.572	BOTH	1.58445
NC_002754	729570	730520	+	SSO0850	41.5994	26.256	BOTH	1.58438
NC_002754	2910849	2911883	-	SSO3161	107.242	67.6973	BOTH	1.58414
NC_002754	1368467	1368937	-	SSO1515	16.8721	26.7272	BOTH	1.5841
NC_002754	2482890	2484452	+	SSO2728	12.6555	20.0466	BOTH	1.58403
NC_002754	1632858	1633280	+	SSO1802	77.1887	122.147	BOTH	1.58245
NC_002754	256072	257013	+	SSO0299	181.467	286.656	BOTH	1.57966
NC_002754	622874	623575	-	SSO0729	487.998	770.105	BOTH	1.57809
NC_002754	2132280	2133047	+	SSO2332	104.598	66.3757	BOTH	1.57585
NC_002754	1655768	1656211	-	SSO1825	6.03089	9.50275	BOTH	1.57568
NC_002754	572192	572893	-	SSO0662	78.8721	124.245	BOTH	1.57528
NC_002754	608266	608955	-	SSO0712	284.797	448.286	BOTH	1.57406
NC_002754	1325625	1326590	-	SSO1466	5.63334	3.5801	BOTH	1.57351
NC_002754	2577155	2578105	+	SSO2816	1213.92	771.608	BOTH	1.57324
NC_002754	2516119	2518407	-	SSO2760	57.6607	90.7126	BOTH	1.57321
NC_002754	2050090	2050752	-	SSO2231	25.7961	40.5825	BOTH	1.5732
NC_002754	379208	379837	+	SSO0437	272.844	429.168	BOTH	1.57294
NC_002754	2041721	2042788	+	SSO2220	44.8065	70.4629	BOTH	1.5726
NC_002754	1620614	1621045	+	SSO1786	48.7875	76.6928	BOTH	1.57198
NC_002754	2701376	2701960	-	SSO2956	7.53038	11.8235	BOTH	1.57011
NC_002754	299584	300255	-	SSO0351	169.028	107.663	BOTH	1.56998
NC_002754	1587105	1588097	+	SSO1752	676.496	1061.68	BOTH	1.56939
NC_002754	1001045	1001473	-	SSO1161	47.7192	74.8106	BOTH	1.56772
NC_002754	1629710	1629961	-	SSO8936	20.2234	12.9003	BOTH	1.56767
NC_002754	835585	836970	+	SSO0977	25.0533	39.2748	BOTH	1.56765
NC_002754	1667701	1669113	+	SSO1842	135.405	86.3983	BOTH	1.56722
NC_002754	1945703	1946350	+	SSO2121	42.6557	27.2187	BOTH	1.56715
NC_002754	2171113	2172168	+	SSO2385	13.1694	20.6324	BOTH	1.5667
NC_002754	2772494	2773108	+	SSO3023	22.4723	35.2024	BOTH	1.56648
NC_002754	551602	552057	+	SSO0637	466.365	730.507	BOTH	1.56639
NC_002754	1683320	1683934	+	SSO1868	138.205	216.05	BOTH	1.56326
NC_002754	1704103	1705134	-	SSO1889	47.2902	73.9262	BOTH	1.56325
NC_002754	41790	42533	-	SSO0046	388.12	248.408	BOTH	1.56243
NC_002754	834345	834527	+	SSO6901	4606.82	2949.26	BOTH	1.56203
NC_002754	570941	572200	+	SSO0661	44.4229	69.3872	BOTH	1.56197
NC_002754	840744	841259	-	SSO0983	67.6292	105.628	BOTH	1.56187
NC_002754	1703139	1704038	-	SSO1888	19.387	30.28	BOTH	1.56187
NC_002754	2916831	2917580	-	SSO3168	265.122	169.783	BOTH	1.56153
NC_002754	2818016	2818387	-	SSO3062	4.64397	7.25144	BOTH	1.56147
NC_002754	1746840	1747112	-	SSO9268	3.16402	2.02689	BOTH	1.56103
NC_002754	312608	313216	-	SSO0367	31.2038	19.9893	BOTH	1.56103
NC_002754	1350091	1350417	+	SSO1496	6.60381	4.23043	BOTH	1.56103
NC_002754	2377462	2377962	-	SSO2611	18.1031	11.597	BOTH	1.56103
NC_002754	2886869	2887369	-	SSO3138	3.44822	2.20894	BOTH	1.56103
NC_002754	1381020	1381553	+	SSO1530	42.8654	27.4598	BOTH	1.56103
NC_002754	2056841	2057269	+	SSO2242	3.0202	1.93476	BOTH	1.56103
NC_002754	1067670	1068104	+	SSO1229	2.97855	1.90807	BOTH	1.56103
NC_002754	775198	775977	-	SSO0910	538.865	345.483	BOTH	1.55974
NC_002754	542368	542856	-	SSO0627	28.4393	18.2467	BOTH	1.5586
NC_002754	176021	176698	+	SSO0202	225.755	144.864	BOTH	1.55839
NC_002754	143195	143365	-	SSO5336	14385.2	22409.9	BOTH	1.55784
NC_002754	37479	37811	-	SSO0043	26.1987	16.8245	BOTH	1.55717
NC_002754	1453219	1453848	-	SSO1607	46.4795	29.8628	BOTH	1.55643
NC_002754	217166	217711	-	SSO0251	11.2323	17.4819	BOTH	1.5564
NC_002754	1192000	1192998	-	SSO1354	35.8827	23.0559	BOTH	1.55634
NC_002754	2104864	2105547	-	SSO2296	72.3604	112.549	BOTH	1.55539
NC_002754	425555	426217	+	SSO0494	11.0741	17.2137	BOTH	1.55441
NC_002754	568520	569194	-	SSO0658	92.5203	143.766	BOTH	1.55389
NC_002754	1760648	1761646	+	SSO1942	14.4395	22.4327	BOTH	1.55356
NC_002754	377758	378120	-	SSO0435	226.058	350.983	BOTH	1.55262
NC_002754	602793	603383	-	SSO0699	295.234	458.074	BOTH	1.55156
NC_002754	1317363	1317629	-	SSO8124	5.1762	8.03069	BOTH	1.55146
NC_002754	820990	823791	-	SSO0965	54.1942	84.0033	BOTH	1.55004
NC_002754	2125249	2126718	+	SSO2325	10.2831	6.63444	BOTH	1.54995
NC_002754	1395998	1397068	-	SSO1545	5.0004	3.22911	BOTH	1.54854
NC_002754	1922326	1923408	-	SSO2101	2.4725	1.59667	BOTH	1.54854
NC_002754	1674961	1675590	-	SSO1857	148.351	229.68	BOTH	1.54823
NC_002754	1341275	1341523	+	SSO8193	5.20349	8.05566	BOTH	1.54813
NC_002754	532730	533902	-	SSO0611	17.5259	11.3215	BOTH	1.54802
NC_002754	700409	700750	-	SSO0817	71.9815	46.5162	BOTH	1.54745
NC_002754	999552	1000148	-	SSO1159	20.2561	13.092	BOTH	1.54721
NC_002754	2376749	2377405	-	SSO2610	48.3821	74.7473	BOTH	1.54494
NC_002754	2722378	2723340	+	SSO2979	33.5465	51.7859	BOTH	1.5437
NC_002754	1689573	1690343	-	SSO1876	102.063	66.1174	BOTH	1.54366
NC_002754	118421	119638	-	SSO0142	3.90048	6.01951	BOTH	1.54327
NC_002754	2404567	2405754	+	SSO2643	98.6656	152.25	BOTH	1.54309
NC_002754	2107986	2108585	-	SSO2303	141.228	217.878	BOTH	1.54274
NC_002754	174323	175930	-	SSO0201	466	718.689	BOTH	1.54225
NC_002754	2941689	2942630	-	SSO3195	70.5144	45.7446	BOTH	1.54148
NC_002754	2651810	2652343	-	SSO2899	6.47025	9.9736	BOTH	1.54146
NC_002754	554869	555972	+	SSO0640	26.0542	40.1598	BOTH	1.54139
NC_002754	459610	460911	-	SSO0530	445.622	686.788	BOTH	1.54119
NC_002754	2358170	2358685	-	SSO2591	168.571	109.381	BOTH	1.54113
NC_002754	839386	840744	-	SSO0981	55.4878	85.5052	BOTH	1.54097
NC_002754	1984523	1984906	-	SSO2158	91.7765	141.397	BOTH	1.54067
NC_002754	2673614	2674066	-	SSO2927	25.1697	16.3376	BOTH	1.5406
NC_002754	451779	452717	+	SSO0524	12.1426	7.88172	BOTH	1.5406
NC_002754	55477	56172	-	SSO0067	417.493	643.179	BOTH	1.54057
NC_002754	1173070	1173648	+	SSO1335	17.007	26.1618	BOTH	1.53829
NC_002754	1214889	1216907	+	SSO1378	2.6953	4.14526	BOTH	1.53796
NC_002754	352123	352782	-	SSO0402	27.8765	18.1303	BOTH	1.53756
NC_002754	2433256	2435610	+	SSO2675	224.582	345.25	BOTH	1.5373
NC_002754	2520491	2521219	-	SSO2763	81.8753	53.3226	BOTH	1.53547
NC_002754	879264	881129	-	SSO1021	36.986	24.0937	BOTH	1.53509
NC_002754	2344187	2344786	-	SSO2572	44.0527	28.7045	BOTH	1.53469
NC_002754	19647	20195	-	SSO0019	27.6913	42.4581	BOTH	1.53327
NC_002754	2131092	2131862	+	SSO2331	81.0002	52.8401	BOTH	1.53293
NC_002754	1152137	1152748	+	SSO1321	45.0238	29.3849	BOTH	1.53221
NC_002754	474274	475011	-	SSO0544	39.0924	59.889	BOTH	1.53199
NC_002754	1362914	1364008	-	SSO1509	7.25732	4.73751	BOTH	1.53189
NC_002754	58779	59324	-	SSO0073	392.181	600.719	BOTH	1.53174
NC_002754	2165372	2166136	-	SSO2374	122.058	186.707	BOTH	1.52966
NC_002754	131130	131924	+	SSO0156	28.5753	43.6756	BOTH	1.52844
NC_002754	1380370	1381005	+	SSO1529	46.041	30.1249	BOTH	1.52834
NC_002754	1634300	1634713	+	SSO1804	45.2754	69.1676	BOTH	1.52771
NC_002754	2748748	2750541	+	SSO3007	37.7963	57.6782	BOTH	1.52603
NC_002754	2499504	2499842	-	SSO2745	174.285	114.259	BOTH	1.52534
NC_002754	2684976	2685683	+	SSO2940	17.6904	26.9636	BOTH	1.5242
NC_002754	2127575	2128387	+	SSO2327	43.0296	28.2456	BOTH	1.52341
NC_002754	1284840	1285598	+	SSO1432	39.9455	26.2454	BOTH	1.522
NC_002754	1590345	1591355	-	SSO1757	29.1344	44.3329	BOTH	1.52167
NC_002754	2588673	2589065	+	SSO2827	217.373	142.911	BOTH	1.52104
NC_002754	1370641	1370931	-	SSO8276	36.5102	24.0066	BOTH	1.52084
NC_002754	1971177	1971818	-	SSO2143	9.82178	6.46426	BOTH	1.5194
NC_002754	459207	459617	+	SSO0529	596.028	392.286	BOTH	1.51937
NC_002754	580953	581537	+	SSO0677	26.5778	17.4988	BOTH	1.51884
NC_002754	2178847	2179395	-	SSO2391	57.5852	87.4359	BOTH	1.51837
NC_002754	663613	664182	+	SSO0780	65.0107	42.8354	BOTH	1.51769
NC_002754	2734443	2734649	+	SSO11637	39.642	60.1457	BOTH	1.51722
NC_002754	2438416	2440404	-	SSO2679	84.0328	55.3967	BOTH	1.51693
NC_002754	2065994	2067139	-	SSO2250	36.7822	55.7686	BOTH	1.51619
NC_002754	2114647	2115105	+	SSO2311	5.26924	7.98667	BOTH	1.51572
NC_002754	1833314	1834018	+	SSO2019	3.43061	5.19983	BOTH	1.51572
NC_002754	297799	298875	-	SSO0348	121.266	80.0212	BOTH	1.51542
NC_002754	1603299	1603598	-	SSO1769	45.2044	68.4759	BOTH	1.51481
NC_002754	1682955	1683302	+	SSO1867	72.9744	110.509	BOTH	1.51435
NC_002754	2924258	2924584	+	SSO3178	108.303	163.929	BOTH	1.51362
NC_002754	257014	258054	+	SSO0302	78.5781	118.867	BOTH	1.51273
NC_002754	53306	54031	-	SSO0064	49.9707	75.5508	BOTH	1.5119
NC_002754	1532572	1533600	-	SSO1679	3.8614	2.55429	BOTH	1.51173
NC_002754	1369373	1370437	+	SSO1516	31.7124	20.9776	BOTH	1.51173
NC_002754	52207	53313	-	SSO0063	171.429	259.113	BOTH	1.51149
NC_002754	1891234	1892334	+	SSO2074	6.27632	9.4862	BOTH	1.51143
NC_002754	994637	995728	+	SSO1153	118.809	179.38	BOTH	1.50981
NC_002754	533862	534488	-	SSO0612	23.1443	15.3338	BOTH	1.50937
NC_002754	2388350	2388715	-	SSO2622	39.8849	60.0964	BOTH	1.50675
NC_002754	2174900	2176030	-	SSO3259	6.26259	4.15862	BOTH	1.50593
NC_002754	159972	161090	+	SSO0187	71.4798	107.615	BOTH	1.50552
NC_002754	1024488	1025756	+	SSO1182	11.2312	7.46726	BOTH	1.50405
NC_002754	2209901	2210416	-	SSO2433	1828.83	2748.74	BOTH	1.503
NC_002754	2149856	2150650	+	SSO2355	29.1186	43.7626	BOTH	1.50291
NC_002754	2924591	2925370	-	SSO3179	103.653	155.716	BOTH	1.50227
NC_002754	2811643	2812542	+	SSO3056	27.0651	40.6552	BOTH	1.50213
NC_002754	1421343	1422710	-	SSO1577	229.394	152.745	BOTH	1.50181
NC_002754	1196929	1198053	-	SSO1361	60.8868	91.4242	BOTH	1.50154
NC_002754	2613811	2614686	-	SSO2855	0.788839	1.18438	BOTH	1.50142
NC_002754	2928941	2930848	+	SSO3182	59.3056	88.9246	BOTH	1.49943
NC_002754	2674428	2674727	+	SSO2928	8.63779	5.76396	BOTH	1.49858
NC_002754	1493962	1494321	-	SSO1640	11.517	7.68529	BOTH	1.49858
NC_002754	2783209	2784174	+	SSO3033	6.4381	4.29612	BOTH	1.49858
NC_002754	2903721	2904686	+	SSO3151	5.90159	3.93811	BOTH	1.49858
NC_002754	956119	956466	-	SSO1104	32.764	21.8633	BOTH	1.49858
NC_002754	251593	252129	-	SSO0294	276.345	414.104	BOTH	1.4985
NC_002754	2154682	2156040	-	SSO2360	208.286	311.941	BOTH	1.49766
NC_002754	1451468	1452040	-	SSO1605	49.7464	74.4789	BOTH	1.49717
NC_002754	2649268	2649651	+	SSO2897	5.17367	7.74533	BOTH	1.49707
NC_002754	309522	310148	+	SSO0364	281.038	420.632	BOTH	1.49671
NC_002754	2177035	2178315	-	SSO2389	33.9847	22.7319	BOTH	1.49502
NC_002754	1457989	1458435	-	SSO1610	88.89	132.765	BOTH	1.49358
NC_002754	489285	489770	-	SSO0554	350.132	522.599	BOTH	1.49258
NC_002754	1681749	1682180	+	SSO1865	733.612	1094.51	BOTH	1.49195
NC_002754	294927	295943	-	SSO0344	364.197	244.161	BOTH	1.49163
NC_002754	2681354	2682670	-	SSO2938	2170.79	1457.19	BOTH	1.48971
NC_002754	1626574	1627305	-	SSO1795	3.65808	2.45677	BOTH	1.48898
NC_002754	2602252	2602821	+	SSO2842	4.69774	3.15501	BOTH	1.48898
NC_002754	1798944	1799870	+	SSO1987	1369.56	920.444	BOTH	1.48793
NC_002754	1630290	1630517	-	SSO8938	15.9117	23.6626	BOTH	1.48712
NC_002754	2297189	2298469	-	SSO2528	143.221	212.956	BOTH	1.4869
NC_002754	1103805	1104530	-	SSO1278	44.6167	30.0107	BOTH	1.48669
NC_002754	2597333	2598418	+	SSO2835	6.04486	8.98032	BOTH	1.48561
NC_002754	655982	657223	-	SSO0771	60.2976	40.5984	BOTH	1.48522
NC_002754	1345827	1346141	+	SSO1490	24.131	16.2489	BOTH	1.48508
NC_002754	1972729	1973694	+	SSO2145	7.86879	5.29855	BOTH	1.48508
NC_002754	302737	303792	-	SSO0356	1117.6	753.114	BOTH	1.48396
NC_002754	2193650	2194153	+	SSO2411	38.2188	56.679	BOTH	1.48301
NC_002754	862206	863093	+	SSO1005	144.839	214.747	BOTH	1.48266
NC_002754	2218528	2219565	-	SSO2446	12.732	18.8578	BOTH	1.48114
NC_002754	2071040	2071489	-	SSO2255	143.579	212.421	BOTH	1.47947
NC_002754	301042	301506	-	SSO0353	353.128	238.74	BOTH	1.47913
NC_002754	2674752	2675360	+	SSO2929	6.3826	4.31588	BOTH	1.47887
NC_002754	1180704	1181360	+	SSO1344	88.2185	130.439	BOTH	1.47859
NC_002754	2489184	2489489	-	SSO2734	22.0179	32.5494	BOTH	1.47832
NC_002754	788300	789469	+	SSO0928	108.157	73.1876	BOTH	1.4778
NC_002754	813804	815459	+	SSO0959	110.633	163.438	BOTH	1.4773
NC_002754	682698	683090	-	SSO0798	110.335	162.975	BOTH	1.47709
NC_002754	1077608	1077949	-	SSO1251	31.0657	21.0334	BOTH	1.47697
NC_002754	1663853	1664752	-	SSO1837	20.3468	30.0495	BOTH	1.47687
NC_002754	882780	884102	-	SSO1024	8.35704	12.3383	BOTH	1.47639
NC_002754	2218254	2218586	-	SSO2442	28.7926	19.5248	BOTH	1.47467
NC_002754	1461980	1463005	-	SSO1614	10.9446	16.1121	BOTH	1.47216
NC_002754	1489987	1492476	-	SSO1638	19.4957	13.2502	BOTH	1.47136
NC_002754	1888545	1889006	-	SSO2071	64.316	94.6189	BOTH	1.47116
NC_002754	2127091	2127492	+	SSO2326	15.6855	10.6676	BOTH	1.47038
NC_002754	1817612	1819159	+	SSO1999	2.67838	3.93201	BOTH	1.46805
NC_002754	1162936	1163484	+	SSO3257	4.7201	6.92936	BOTH	1.46805
NC_002754	889657	890400	+	SSO1030	52.9413	77.7206	BOTH	1.46805
NC_002754	1023932	1024519	+	SSO1181	13.8087	9.41055	BOTH	1.46736
NC_002754	259048	260112	+	SSO0305	29.0359	42.6046	BOTH	1.46731
NC_002754	2059246	2059656	-	SSO2244	151.319	221.976	BOTH	1.46694
NC_002754	2408848	2409285	+	SSO2648	1604.5	2350.91	BOTH	1.4652
NC_002754	1745703	1746776	+	SSO1924	9.40988	13.782	BOTH	1.46463
NC_002754	1267334	1267870	+	SSO1414	35.7093	52.2943	BOTH	1.46445
NC_002754	2046576	2047151	-	SSO2227	198.699	290.96	BOTH	1.46433
NC_002754	576091	576729	-	SSO0669	71.6436	48.926	BOTH	1.46432
NC_002754	537335	537808	+	SSO0617	71.0704	104.043	BOTH	1.46395
NC_002754	1343008	1343346	-	SSO1486	7.38926	10.8138	BOTH	1.46345
NC_002754	2575303	2577201	+	SSO2815	809.605	553.559	BOTH	1.46254
NC_002754	392792	393589	+	SSO0453	16.1282	23.5759	BOTH	1.46178
NC_002754	2423246	2423854	+	SSO2667	38.0119	55.5385	BOTH	1.46108
NC_002754	2281312	2283303	-	SSO2514	773.455	529.486	BOTH	1.46076
NC_002754	95139	95849	-	SSO0116	31.1009	45.4307	BOTH	1.46075
NC_002754	2666239	2666625	+	SSO2916	3.79438	5.54056	BOTH	1.4602
NC_002754	285759	286874	-	SSO0333	24.0712	35.1416	BOTH	1.4599
NC_002754	602147	602800	-	SSO0698	371.134	541.601	BOTH	1.45931
NC_002754	1000636	1001082	-	SSO1160	19.5171	28.4717	BOTH	1.4588
NC_002754	3057	3743	+	SSO0006	25.3979	17.4177	BOTH	1.45816
NC_002754	1032029	1033321	+	SSO1188	41.8862	28.7262	BOTH	1.45812
NC_002754	541376	542374	-	SSO0625	41.5893	28.5256	BOTH	1.45797
NC_002754	1496721	1497683	+	SSO1643	1.25575	0.861901	BOTH	1.45696
NC_002754	2209361	2209930	+	SSO2432	443.558	645.321	BOTH	1.45488
NC_002754	1332122	1332589	-	SSO1471	24.9167	36.2095	BOTH	1.45322
NC_002754	294560	294880	-	SSO0342	2781.31	4038.65	BOTH	1.45207
NC_002754	607020	607436	-	SSO0708	300.355	436.071	BOTH	1.45185
NC_002754	1641643	1642833	-	SSO1811	42.9351	62.1986	BOTH	1.44866
NC_002754	1692724	1694721	+	SSO1879	12.667	18.3478	BOTH	1.44847
NC_002754	1252536	1253594	-	SSO1405	15.3343	22.2068	BOTH	1.44818
NC_002754	2045924	2046595	+	SSO2226	71.4674	103.443	BOTH	1.44741
NC_002754	2968706	2969605	+	SSO3220	31.8638	46.1117	BOTH	1.44715
NC_002754	2667810	2668310	+	SSO2919	3.79304	2.62312	BOTH	1.446
NC_002754	1336991	1337419	-	SSO1479	9.26196	13.3821	BOTH	1.44484
NC_002754	360575	361012	+	SSO0414	72.376	104.541	BOTH	1.44442
NC_002754	73708	74100	-	SSO0091	3731.61	2583.84	BOTH	1.44421
NC_002754	1706392	1706970	+	SSO1891	33.2682	23.0559	BOTH	1.44294
NC_002754	35789	36382	+	SSO0041	15.4142	22.2408	BOTH	1.44287
NC_002754	2699421	2700587	-	SSO2955	3.33077	4.80083	BOTH	1.44136
NC_002754	2331433	2332599	+	SSO2558	4.07094	5.86769	BOTH	1.44136
NC_002754	1164087	1164377	+	SSO7710	1.48416	2.1392	BOTH	1.44136
NC_002754	722533	723915	+	SSO0842	32.2902	22.4057	BOTH	1.44116
NC_002754	114650	115024	-	SSO0138	41.4614	28.7737	BOTH	1.44095
NC_002754	1357488	1358021	+	SSO1503	60.9821	87.8195	BOTH	1.44009
NC_002754	559125	559973	+	SSO0645	89.7353	129.211	BOTH	1.43991
NC_002754	1042798	1043697	-	SSO1202	15.9319	22.9022	BOTH	1.4375
NC_002754	637594	638010	-	SSO0753	7.0428	10.118	BOTH	1.43665
NC_002754	2578274	2580106	+	SSO2817	212.34	305.009	BOTH	1.43642
NC_002754	603841	604257	-	SSO0701	254.162	365.079	BOTH	1.4364
NC_002754	2459292	2460002	+	SSO2706	131.207	91.3479	BOTH	1.43634
NC_002754	2144479	2145309	+	SSO2350	78.582	112.866	BOTH	1.43628
NC_002754	264045	264707	+	SSO0311	57.3247	82.3125	BOTH	1.4359
NC_002754	396396	396959	-	SSO0461	22.3602	15.575	BOTH	1.43565
NC_002754	2931358	2932581	-	SSO3184	2834.87	4069.02	BOTH	1.43534
NC_002754	1089349	1089807	-	SSO1264	9.97391	14.3157	BOTH	1.43532
NC_002754	607438	607782	-	SSO0709	269.649	386.737	BOTH	1.43422
NC_002754	2630800	2631732	-	SSO2878	48.7901	69.9089	BOTH	1.43285
NC_002754	535932	536519	+	SSO0615	64.0489	91.7529	BOTH	1.43254
NC_002754	1076566	1077174	-	SSO1250	12.7652	18.2857	BOTH	1.43246
NC_002754	863102	864232	+	SSO1007	80.1153	55.9579	BOTH	1.43171
NC_002754	2524288	2525646	+	SSO2766	36.3562	25.3971	BOTH	1.43151
NC_002754	2197562	2198356	+	SSO2418	127.991	183.055	BOTH	1.43021
NC_002754	2130106	2130258	+	SSO10228	7.90386	11.3019	BOTH	1.42992
NC_002754	2012181	2012690	-	SSO2188	183.934	262.972	BOTH	1.42971
NC_002754	1881105	1882334	+	SSO2062	141.997	99.3651	BOTH	1.42904
NC_002754	575760	576098	-	SSO0668	69.3061	48.5601	BOTH	1.42722
NC_002754	1977528	1977869	+	SSO2151	16.1643	23.0559	BOTH	1.42635
NC_002754	1050958	1051857	-	SSO1212	17.0836	24.3624	BOTH	1.42607
NC_002754	1498101	1499135	+	SSO1646	69.1857	48.5175	BOTH	1.42599
NC_002754	1599439	1599594	+	SSO8869	4.98334	7.09411	BOTH	1.42357
NC_002754	1064502	1065716	+	SSO1225	86.6622	123.306	BOTH	1.42284
NC_002754	620585	622795	-	SSO0728	231.279	329.007	BOTH	1.42256
NC_002754	401626	402570	-	SSO0468	31.9004	45.3798	BOTH	1.42255
NC_002754	2275798	2276241	-	SSO2507	868.253	1235.05	BOTH	1.42245
NC_002754	1721545	1722510	-	SSO1904	7.33228	5.15535	BOTH	1.42227
NC_002754	506253	507260	-	SSO0576	177.297	124.68	BOTH	1.42202
NC_002754	242664	243029	-	SSO0284	96.9981	68.2227	BOTH	1.42179
NC_002754	1617553	1617747	+	SSO8906	17.7185	25.1841	BOTH	1.42134
NC_002754	1918567	1919208	+	SSO2097	7.13088	10.1273	BOTH	1.42021
NC_002754	2914470	2915096	+	SSO3164	14.8785	10.4799	BOTH	1.41971
NC_002754	624928	625755	-	SSO0732	260.698	370.063	BOTH	1.41951
NC_002754	897163	897495	-	SSO1036	60.4386	85.7844	BOTH	1.41937
NC_002754	2643850	2644194	+	SSO2891	137.704	97.0351	BOTH	1.41911
NC_002754	636420	636761	-	SSO0751	134.618	190.919	BOTH	1.41822
NC_002754	2184160	2184975	+	SSO2397	23.0764	32.719	BOTH	1.41785
NC_002754	407678	409012	+	SSO0473	28.275	40.0498	BOTH	1.41644
NC_002754	1251428	1252072	+	SSO1403	24.2394	34.3157	BOTH	1.4157
NC_002754	1714872	1715066	+	SSO9180	2349.03	3325.36	BOTH	1.41563
NC_002754	1181782	1182555	-	SSO1345	28.5694	20.1962	BOTH	1.41459
NC_002754	1282426	1283310	+	SSO1429	82.4738	116.608	BOTH	1.41388
NC_002754	1393968	1394735	+	SSO1542	35.6534	25.2173	BOTH	1.41384
NC_002754	419671	420330	+	SSO0487	443.014	313.455	BOTH	1.41333
NC_002754	1267917	1268147	-	SSO7998	52.3502	73.9584	BOTH	1.41276
NC_002754	938924	940120	+	SSO1080	35.1429	49.6365	BOTH	1.41242
NC_002754	213501	214310	-	SSO0246	138.738	195.889	BOTH	1.41194
NC_002754	203519	205267	-	SSO0235	1899.82	1346.26	BOTH	1.41119
NC_002754	2980572	2981609	-	SSO3237	6.99012	9.86204	BOTH	1.41086
NC_002754	960707	961612	+	SSO1114	129.281	182.386	BOTH	1.41077
NC_002754	1106211	1106948	-	SSO1281	337.552	239.275	BOTH	1.41073
NC_002754	2514006	2514560	-	SSO2758	336.796	474.826	BOTH	1.40983
NC_002754	2744889	2745788	-	SSO3004	68.1425	48.3405	BOTH	1.40964
NC_002754	147343	149652	+	SSO0176	166.025	117.794	BOTH	1.40945
NC_002754	2356652	2357785	+	SSO2589	705.343	993.903	BOTH	1.40911
NC_002754	1816948	1817670	+	SSO1998	5.25674	3.73103	BOTH	1.40893
NC_002754	543785	544459	+	SSO0628	75.7566	53.797	BOTH	1.40819
NC_002754	1983860	1984561	+	SSO2157	85.0244	119.713	BOTH	1.40799
NC_002754	54626	55480	-	SSO0066	147.095	206.936	BOTH	1.40682
NC_002754	776890	777141	+	SSO6778	263.247	187.192	BOTH	1.4063
NC_002754	510007	510810	-	SSO0581	16.3301	11.614	BOTH	1.40608
NC_002754	666652	667260	-	SSO0784	87.7962	62.4666	BOTH	1.40549
NC_002754	1624333	1624932	+	SSO1790	16.8437	11.989	BOTH	1.40492
NC_002754	2015157	2015987	-	SSO2192	116.522	163.638	BOTH	1.40436
NC_002754	306624	307280	+	SSO0361	213.775	300.042	BOTH	1.40354
NC_002754	199932	200582	+	SSO0231	186.555	261.796	BOTH	1.40332
NC_002754	553506	554885	+	SSO0639	14.8971	20.9006	BOTH	1.40301
NC_002754	1011604	1014312	+	SSO1172	28.1549	39.4988	BOTH	1.40291
NC_002754	2431276	2433222	-	SSO2674	15.8382	22.2033	BOTH	1.40188
NC_002754	1690351	1690563	-	SSO9115	119.226	85.0794	BOTH	1.40135
NC_002754	1925822	1926151	+	SSO2104	1.047	1.46719	BOTH	1.40132
NC_002754	51207	52205	-	SSO0061	212.702	151.836	BOTH	1.40087
NC_002754	1980262	1982619	+	SSO2154	211.585	296.324	BOTH	1.40049
NC_002754	109171	110052	-	SSO0129	19.4889	27.2906	BOTH	1.40032
NC_002754	623597	623977	-	SSO0730	926.352	1296.94	BOTH	1.40005
NC_002754	2091532	2091969	-	SSO2282	17.9461	25.1088	BOTH	1.39912
NC_002754	1959055	1960068	-	SSO2132	7.07038	9.89083	BOTH	1.39891
NC_002754	2596140	2597105	+	SSO2834	10.0148	7.1602	BOTH	1.39868
NC_002754	432474	433139	+	SSO0500	60.698	43.4115	BOTH	1.3982
NC_002754	1149105	1149938	-	SSO1318	12.2213	17.0846	BOTH	1.39793
NC_002754	1527413	1527799	-	SSO1674	13.1687	18.4089	BOTH	1.39793
NC_002754	1294537	1295502	-	SSO1442	181.787	254.044	BOTH	1.39748
NC_002754	1759304	1760605	+	SSO1941	53.5383	74.7987	BOTH	1.39711
NC_002754	1783693	1784091	+	SSO1969	9.30889	13.0014	BOTH	1.39667
NC_002754	350522	351217	-	SSO0399	32.8881	23.5528	BOTH	1.39636
NC_002754	534485	534976	-	SSO0613	24.9302	17.8542	BOTH	1.39632
NC_002754	2418937	2419497	+	SSO2661	6134.52	8562.23	BOTH	1.39575
NC_002754	1330173	1331039	-	SSO1469	333.257	238.856	BOTH	1.39522
NC_002754	2425098	2427179	+	SSO2669	3913.85	2807.63	BOTH	1.394
NC_002754	71195	72679	-	SSO0090	84.9237	60.9234	BOTH	1.39394
NC_002754	792761	793129	+	SSO0931	1708.83	2381.88	BOTH	1.39386
NC_002754	766078	767073	+	SSO0898	792.231	568.549	BOTH	1.39343
NC_002754	2501459	2502247	+	SSO2747	20.1439	14.4647	BOTH	1.39262
NC_002754	1340550	1340996	+	SSO1483	57.7785	80.4634	BOTH	1.39262
NC_002754	1939146	1939457	-	SSO2114	6.3676	8.86764	BOTH	1.39262
NC_002754	834557	835240	+	SSO0976	139.796	194.66	BOTH	1.39246
NC_002754	540202	540831	+	SSO0622	47.8506	34.3642	BOTH	1.39245
NC_002754	2088749	2089243	+	SSO2278	18.6716	25.9902	BOTH	1.39197
NC_002754	2186409	2187092	-	SSO2401	18.8162	26.1906	BOTH	1.39192
NC_002754	512873	513745	-	SSO0584	43.8321	61.0069	BOTH	1.39183
NC_002754	1764009	1764932	-	SSO1946	3.64582	2.61998	BOTH	1.39154
NC_002754	782382	783422	+	SSO0919	350.573	487.827	BOTH	1.39151
NC_002754	2693997	2695070	-	SSO2951	7.07752	5.08775	BOTH	1.39109
NC_002754	29591	30088	-	SSO0033	143.79	200.003	BOTH	1.39094
NC_002754	362362	363606	-	SSO0417	175.184	243.67	BOTH	1.39094
NC_002754	2357820	2358191	+	SSO2590	489.01	351.788	BOTH	1.39007
NC_002754	1661199	1661897	-	SSO1833	15.8174	11.3795	BOTH	1.38999
NC_002754	2621546	2621887	-	SSO2866	114.665	159.369	BOTH	1.38986
NC_002754	297579	297767	-	SSO5663	171.385	123.331	BOTH	1.38964
NC_002754	1173626	1174897	+	SSO1336	6.7228	4.83956	BOTH	1.38914
NC_002754	2574657	2574959	-	SSO2814	32.2135	44.7421	BOTH	1.38892
NC_002754	2532076	2533125	-	SSO2775	35.127	25.2956	BOTH	1.38866
NC_002754	2154229	2154594	+	SSO2359	1256.26	1743.55	BOTH	1.3879
NC_002754	2340175	2341242	+	SSO2568	13.911	19.2996	BOTH	1.38736
NC_002754	1782833	1783108	-	SSO9378	100.148	138.836	BOTH	1.38631
NC_002754	2766637	2768106	+	SSO3019	73.9794	102.528	BOTH	1.3859
NC_002754	2716493	2718865	+	SSO2973	90.1635	124.956	BOTH	1.38589
NC_002754	2711059	2711817	-	SSO2966	20.2573	28.068	BOTH	1.38558
NC_002754	1495464	1496429	+	SSO1642	6.34868	4.58253	BOTH	1.38541
NC_002754	1228221	1231316	+	SSO1388	49.6617	35.8796	BOTH	1.38412
NC_002754	1146950	1147540	+	SSO3256	5.99237	4.33029	BOTH	1.38383
NC_002754	301577	302740	+	SSO0354	260.692	188.428	BOTH	1.38351
NC_002754	2330291	2331250	+	SSO2557	10.1674	7.34906	BOTH	1.3835
NC_002754	1199398	1200696	-	SSO1365	14.3631	10.3831	BOTH	1.38331
NC_002754	930672	931112	-	SSO1073	2.15455	2.98001	BOTH	1.38312
NC_002754	1303474	1304397	-	SSO1450	2.05662	2.84455	BOTH	1.38312
NC_002754	1536092	1536595	-	SSO1683	1.88523	2.60751	BOTH	1.38312
NC_002754	2899166	2899429	-	SSO12067	10.1429	7.33596	BOTH	1.38262
NC_002754	1062806	1063813	-	SSO1223	112.514	81.3817	BOTH	1.38255
NC_002754	668738	670138	+	SSO0786	25.5866	35.349	BOTH	1.38155
NC_002754	338970	341201	+	SSO0391	74.1874	102.481	BOTH	1.38138
NC_002754	1424009	1424695	-	SSO1579	614.578	848.435	BOTH	1.38052
NC_002754	768342	768863	+	SSO0903	56.9233	78.5754	BOTH	1.38037
NC_002754	1609060	1609854	+	SSO1777	2.28168	1.65306	BOTH	1.38027
NC_002754	1441519	1443069	-	SSO1597	24.2816	33.4912	BOTH	1.37928
NC_002754	1665410	1666546	+	SSO1839	48.089	66.3084	BOTH	1.37887
NC_002754	1562041	1562457	+	SSO1722	12.6356	17.4163	BOTH	1.37835
NC_002754	1362107	1362562	-	SSO1508	16.2906	22.4491	BOTH	1.37804
NC_002754	525978	526376	+	SSO0601	172.972	238.186	BOTH	1.37702
NC_002754	1522660	1524249	+	SSO1668	4.67201	3.39313	BOTH	1.3769
NC_002754	1995866	1996393	+	SSO2171	7.03456	5.10897	BOTH	1.3769
NC_002754	901138	901704	+	SSO1041	141.069	102.47	BOTH	1.37668
NC_002754	1709631	1710356	-	SSO1894	428.201	311.254	BOTH	1.37573
NC_002754	2752144	2754315	+	SSO3009	135.93	98.8154	BOTH	1.37559
NC_002754	2018852	2019943	-	SSO2197	79.3379	109.072	BOTH	1.37478
NC_002754	876820	877941	-	SSO1018	976.486	1341.68	BOTH	1.37399
NC_002754	1335113	1336363	+	SSO1475	8.00946	11.0027	BOTH	1.37371
NC_002754	442549	442869	-	SSO0508	17.7599	12.9285	BOTH	1.3737
NC_002754	947203	947754	-	SSO1092	156.951	114.277	BOTH	1.37343
NC_002754	1656295	1656723	-	SSO1826	7.04714	9.67379	BOTH	1.37272
NC_002754	799669	800085	+	SSO0941	52.821	38.4817	BOTH	1.37263
NC_002754	2084832	2085617	+	SSO2276	221.769	304.214	BOTH	1.37176
NC_002754	1756848	1757978	+	SSO1938	6.87357	5.0148	BOTH	1.37066
NC_002754	1638947	1639645	-	SSO1808	75.3798	55.0174	BOTH	1.37011
NC_002754	1886148	1886732	+	SSO2069	20.3763	27.9035	BOTH	1.36941
NC_002754	3736	4458	+	SSO0007	20.1907	27.6479	BOTH	1.36934
NC_002754	959104	959568	-	SSO1111	359.629	492.354	BOTH	1.36906
NC_002754	66854	67888	+	SSO0083	70.8549	96.9683	BOTH	1.36855
NC_002754	1378387	1379361	+	SSO1526	36.5002	26.6739	BOTH	1.36839
NC_002754	2379111	2379581	+	SSO2613	14032.3	10256.3	BOTH	1.36816
NC_002754	1474711	1476120	+	SSO1624	30.0178	41.0591	BOTH	1.36782
NC_002754	1334725	1335126	+	SSO1474	17.6194	24.0882	BOTH	1.36714
NC_002754	1965885	1966292	-	SSO2138	215.733	294.81	BOTH	1.36655
NC_002754	983163	984278	-	SSO1142	1031.43	1409.38	BOTH	1.36644
NC_002754	2420871	2421629	+	SSO2664	46.091	62.9707	BOTH	1.36623
NC_002754	2598439	2599185	+	SSO2836	5.89728	8.05566	BOTH	1.366
NC_002754	2690118	2691392	+	SSO2944	7.11347	5.20791	BOTH	1.3659
NC_002754	351659	352126	-	SSO0401	45.2192	33.1058	BOTH	1.3659
NC_002754	2465096	2466040	+	SSO2713	202.28	148.143	BOTH	1.36543
NC_002754	1805724	1806668	+	SSO1992	48.3533	35.4255	BOTH	1.36493
NC_002754	745122	745781	-	SSO0873	471.283	345.314	BOTH	1.3648
NC_002754	2198301	2200124	-	SSO2420	98.8799	134.922	BOTH	1.36451
NC_002754	582563	583798	+	SSO0679	41.3719	56.4085	BOTH	1.36345
NC_002754	84240	84935	+	SSO0102	74.5878	54.7577	BOTH	1.36214
NC_002754	991959	993335	+	SSO1151	972.488	1323.83	BOTH	1.36128
NC_002754	597866	598435	-	SSO0692	290.048	394.619	BOTH	1.36053
NC_002754	835237	835521	+	SSO6904	92.4395	67.9541	BOTH	1.36032
NC_002754	207852	208922	+	SSO0239	65.3278	88.8652	BOTH	1.3603
NC_002754	56169	56369	-	SSO5140	340.784	463.526	BOTH	1.36017
NC_002754	252385	253464	-	SSO0295	84.2984	114.639	BOTH	1.35992
NC_002754	546572	547924	+	SSO0632	31.474	42.7888	BOTH	1.3595
NC_002754	1658048	1659307	-	SSO1829	30.6436	41.6103	BOTH	1.35788
NC_002754	881006	881611	-	SSO1022	30.218	22.2569	BOTH	1.35769
NC_002754	916860	917306	+	SSO1055	167.538	227.464	BOTH	1.35768
NC_002754	2731824	2732801	-	SSO2989	23.2284	17.1151	BOTH	1.35719
NC_002754	830094	831437	+	SSO0971	56.5569	41.6858	BOTH	1.35674
NC_002754	516107	518941	+	SSO0589	290.668	394.341	BOTH	1.35667
NC_002754	1737369	1738631	-	SSO1918	2.59886	1.91676	BOTH	1.35586
NC_002754	343538	343828	-	SSO5763	199.767	147.367	BOTH	1.35557
NC_002754	633839	634552	-	SSO0747	50.8105	68.877	BOTH	1.35557
NC_002754	2217271	2218257	+	SSO2441	46.9083	63.5613	BOTH	1.35501
NC_002754	2887379	2888815	-	SSO3139	28.8527	39.0843	BOTH	1.35461
NC_002754	605928	606647	-	SSO0705	206.707	279.937	BOTH	1.35427
NC_002754	2898515	2898775	-	SSO12063	4.30235	3.18012	BOTH	1.35289
NC_002754	1503303	1503698	-	SSO1651	5.67127	4.19197	BOTH	1.35289
NC_002754	1978217	1978630	-	SSO2152	3.33827	4.51093	BOTH	1.35128
NC_002754	738414	739154	+	SSO0863	82.0648	60.7667	BOTH	1.35049
NC_002754	2162297	2162611	-	SSO2369	80.3451	108.472	BOTH	1.35008
NC_002754	2590634	2592271	-	SSO2830	53.7357	72.5457	BOTH	1.35005
NC_002754	1802590	1805727	+	SSO1991	78.2576	57.9703	BOTH	1.34996
NC_002754	1838292	1839959	+	SSO2025	41.48	30.7273	BOTH	1.34994
NC_002754	13920	15314	-	SSO0016	105.325	142.054	BOTH	1.34872
NC_002754	2406310	2406882	+	SSO2645	233.356	314.694	BOTH	1.34856
NC_002754	1730365	1730715	+	SSO1910	38.8823	52.4176	BOTH	1.34811
NC_002754	1840170	1840364	-	SSO9535	1149.93	853.067	BOTH	1.348
NC_002754	2969724	2971064	-	SSO3224	976.373	724.738	BOTH	1.34721
NC_002754	1598847	1599287	-	SSO1765	4.3091	5.80318	BOTH	1.34673
NC_002754	2745789	2748695	-	SSO3006	93.5092	125.915	BOTH	1.34655
NC_002754	23195	23842	-	SSO0024	119.569	160.964	BOTH	1.3462
NC_002754	416056	416394	+	SSO0482	1960.7	2638.98	BOTH	1.34594
NC_002754	1792375	1794081	+	SSO1981	0.70843	0.52676	BOTH	1.34488
NC_002754	395505	396395	-	SSO0460	323.505	434.956	BOTH	1.34451
NC_002754	2441975	2442394	-	SSO2681	214.711	159.744	BOTH	1.34409
NC_002754	2850831	2852477	-	SSO3099	7.44727	5.54349	BOTH	1.34343
NC_002754	691470	692135	+	SSO0807	16.6011	12.3588	BOTH	1.34327
NC_002754	1337632	1338525	-	SSO1480	5.50731	4.10054	BOTH	1.34307
NC_002754	1448024	1448893	+	SSO1601	16.2827	21.8633	BOTH	1.34273
NC_002754	2140629	2141474	+	SSO2345	277.818	372.982	BOTH	1.34254
NC_002754	121317	122189	-	SSO0143	3.36409	4.5161	BOTH	1.34244
NC_002754	296598	297119	-	SSO0346	249.371	185.772	BOTH	1.34235
NC_002754	2037178	2037543	+	SSO2214	24.7805	33.2609	BOTH	1.34222
NC_002754	11143	11760	+	SSO0012	44.8662	60.2138	BOTH	1.34208
NC_002754	1841761	1842330	-	SSO2027	61.0707	81.909	BOTH	1.34122
NC_002754	2697813	2698394	+	SSO2953	125.263	167.809	BOTH	1.33965
NC_002754	2479293	2480882	-	SSO2726	460.573	343.924	BOTH	1.33917
NC_002754	942577	943503	-	SSO1087	131.757	176.389	BOTH	1.33875
NC_002754	1931907	1933070	-	SSO2110	42.0758	56.2729	BOTH	1.33742
NC_002754	608048	608269	-	SSO6397	247.461	185.07	BOTH	1.33712
NC_002754	1827452	1827823	+	SSO2013	91.4862	68.4238	BOTH	1.33705
NC_002754	247569	248924	-	SSO0290	23.8877	31.9313	BOTH	1.33673
NC_002754	1054107	1054868	-	SSO1215	8.72847	6.53552	BOTH	1.33554
NC_002754	966101	966616	-	SSO1120	80.0167	59.9184	BOTH	1.33543
NC_002754	767703	768017	-	SSO0902	114.896	86.0752	BOTH	1.33484
NC_002754	1801739	1802593	+	SSO1990	232.463	174.173	BOTH	1.33467
NC_002754	2475379	2476134	-	SSO2722	1.71385	2.28729	BOTH	1.33459
NC_002754	2284524	2285990	+	SSO2516	1.94306	2.59319	BOTH	1.33459
NC_002754	2853692	2854657	+	SSO3101	1.34127	1.79005	BOTH	1.33459
NC_002754	1045601	1046758	-	SSO1207	77.3522	103.154	BOTH	1.33356
NC_002754	279044	279547	+	SSO0327	1117.09	837.971	BOTH	1.33308
NC_002754	1788560	1788904	-	SSO1976	4.00593	3.00729	BOTH	1.33207
NC_002754	2195006	2196502	-	SSO2415	34.4473	45.8807	BOTH	1.33191
NC_002754	793122	794162	-	SSO0934	385.34	289.361	BOTH	1.33169
NC_002754	820609	820878	-	SSO6877	409.175	307.411	BOTH	1.33103
NC_002754	562836	563246	+	SSO0650	74.6086	99.2917	BOTH	1.33083
NC_002754	1644442	1644786	-	SSO1813	28.7926	38.2928	BOTH	1.32995
NC_002754	1749834	1751138	-	SSO1930	10.8551	8.1623	BOTH	1.32991
NC_002754	2533143	2533412	-	SSO11114	63.3438	47.6488	BOTH	1.32939
NC_002754	657759	658349	+	SSO0772	16.954	12.7568	BOTH	1.32902
NC_002754	11767	11946	-	SSO5027	119.489	89.9179	BOTH	1.32887
NC_002754	167125	167655	-	SSO0194	29.7686	22.4046	BOTH	1.32869
NC_002754	2121601	2122566	+	SSO2320	13.8598	18.4017	BOTH	1.3277
NC_002754	1434983	1435294	-	SSO1588	9.68982	12.8581	BOTH	1.32697
NC_002754	1077940	1078293	-	SSO1252	16.5924	12.5049	BOTH	1.32687
NC_002754	2984729	2985496	+	SSO3241	49.1499	65.2049	BOTH	1.32665
NC_002754	2473023	2474357	+	SSO2720	88.513	117.404	BOTH	1.3264
NC_002754	648346	648834	-	SSO0762	24.1999	18.2467	BOTH	1.32627
NC_002754	370522	370854	-	SSO0425	611.13	460.909	BOTH	1.32592
NC_002754	2677189	2678730	-	SSO2934	32.9379	24.8501	BOTH	1.32546
NC_002754	2774114	2775244	-	SSO3027	6.64445	5.0148	BOTH	1.32497
NC_002754	1123604	1124347	+	SSO1294	156.966	207.968	BOTH	1.32492
NC_002754	2755698	2756789	+	SSO3011	68.8966	91.2733	BOTH	1.32479
NC_002754	1358059	1359234	-	SSO1504	17.114	22.6441	BOTH	1.32314
NC_002754	2386240	2387187	-	SSO2620	55.4896	73.3993	BOTH	1.32276
NC_002754	972029	973135	+	SSO1131	1238.63	1638.03	BOTH	1.32245
NC_002754	2987926	2988291	-	SSO3246	485.698	367.571	BOTH	1.32137
NC_002754	515500	516024	-	SSO0588	80.9484	61.2627	BOTH	1.32133
NC_002754	962667	963506	+	SSO1116	17.8926	23.6323	BOTH	1.32079
NC_002754	2324504	2326336	+	SSO2552	526.372	695.223	BOTH	1.32078
NC_002754	79467	80372	-	SSO0098	87.7126	115.661	BOTH	1.31864
NC_002754	1547520	1548416	-	SSO1695	3.65926	2.77596	BOTH	1.3182
NC_002754	2447805	2449580	-	SSO2693	24.2695	31.9744	BOTH	1.31748
NC_002754	1402589	1403125	-	SSO1553	266.854	202.737	BOTH	1.31626
[truncated: 815 more rows]
