# Supplementary material for: The Heptameric SmAP1 and SmAP2 Proteins of the Crenarchaeon Sulfolobus Solfataricus Bind to Common and Distinct RNA Targets
Source: Life (Basel). 2015 Apr 21;5(2):1264–81. doi: 10.3390/life5021264 (PMC4500138; doi:10.3390/life5021264)
Supplement: Supplementary file 1 [file life-05-01264-s001.zip › Supplementary Table S3_deepseq_sorted tohighFPKM.xls]

## Sheet: highSm1
contig	start	end	strand	gene_id	FPKM1	FPKM2	binding	fc
NC_002754	337472	338665	+	SSO0390	70907.2	37051.8	BOTH	1.91373	Carboxypeptidase
NC_002754	1638041	1638670	-	SSO1807	31496.7	9304.58	BOTH	3.38507	membrane bound
NC_002754	333735	337430	+	SSO0389	27711.8	44969.7	BOTH	1.62276
NC_002754	2393762	2393995	+	SSO10788	23677.1	19119.8	BOTH	1.23836
NC_002754	500453	500761	+	SSO0567	20294	7096.95	BOTH	2.85954
NC_002754	143195	143365	-	SSO5336	14385.2	22409.9	BOTH	1.55784
NC_002754	816731	817033	-	SSO0962	14315.1	24690.8	BOTH	1.72481
NC_002754	2379111	2379581	+	SSO2613	14032.3	10256.3	BOTH	1.36816
NC_002754	41328	41528	+	SSO5098	13710	3294.23	BOTH	4.16182
NC_002754	40264	41331	+	SSO0045	12688.1	3014.62	BOTH	4.20885
NC_002754	1606986	1607255	-	SSO8892	11359.3	12396.1	BOTH	1.09127
NC_002754	2369804	2370178	+	SSO2603	11142.3	11167.9	BOTH	1.0023
NC_002754	38481	40262	+	SSO0044	10953.9	3794.67	BOTH	2.88665
NC_002754	2158065	2158346	+	SSO10285	6774.23	19411.8	BOTH	2.86554
NC_002754	751217	751882	+	SSO0881	6553.17	8229.7	BOTH	1.25583
NC_002754	2418937	2419497	+	SSO2661	6134.52	8562.23	BOTH	1.39575
NC_002754	2413438	2413560	-	SSO10828	6082.97	5226.37	BOTH	1.1639
NC_002754	2419490	2419900	+	SSO2662	5685.6	5674.94	BOTH	1.00188
NC_002754	239345	241018	+	SSO0282	5592.01	5709.38	BOTH	1.02099
NC_002754	2157622	2158068	+	SSO2364	5378.23	31215	BOTH	5.80396
NC_002754	736622	738301	-	SSO0862	5311.16	4616.57	BOTH	1.15046
NC_002754	2320224	2320430	+	SSO10610	5250.27	4334.84	BOTH	1.21118
NC_002754	177200	177619	-	SSO0205	4941.64	8295.99	BOTH	1.67879
NC_002754	834345	834527	+	SSO6901	4606.82	2949.26	BOTH	1.56203
NC_002754	2418081	2419055	+	SSO2660	4265.12	7386.03	BOTH	1.73173
NC_002754	925904	927847	+	SSO1069	4039.41	4075.3	BOTH	1.00889
NC_002754	2425098	2427179	+	SSO2669	3913.85	2807.63	BOTH	1.394
NC_002754	2606453	2608117	-	SSO2847	3847.01	10684.4	BOTH	2.77732
NC_002754	73708	74100	-	SSO0091	3731.61	2583.84	BOTH	1.44421
NC_002754	790181	792706	+	SSO0929	3341.62	1425.93	BOTH	2.34347
NC_002754	954091	954474	-	SSO1101	3203.4	3182.25	BOTH	1.00665
NC_002754	599211	599798	-	SSO0694	3172.77	6350.95	BOTH	2.0017
NC_002754	322456	323946	+	SSO0379	3109.37	7547.11	BOTH	2.42721
NC_002754	2348373	2348657	+	SSO10704	3039.59	5816.63	BOTH	1.91362
NC_002754	464828	465232	-	SSO0536	2972.46	1523.39	BOTH	1.95121
NC_002754	642176	642415	-	SSO6454	2954.48	3509.97	BOTH	1.18801
NC_002754	2345414	2345728	+	SSO2574	2926.43	7018.64	BOTH	2.39837
NC_002754	13020	13880	-	SSO0015	2891.7	1468.34	BOTH	1.96936
NC_002754	2931358	2932581	-	SSO3184	2834.87	4069.02	BOTH	1.43534
NC_002754	294560	294880	-	SSO0342	2781.31	4038.65	BOTH	1.45207
NC_002754	856747	858180	+	SSO0999	2770.3	11889.6	BOTH	4.29183
NC_002754	599801	601210	-	SSO0695	2672.14	5538.21	BOTH	2.07258
NC_002754	2383915	2386095	-	SSO2619	2560.8	2936.21	BOTH	1.1466
NC_002754	2147932	2149548	-	SSO2354	2466.87	798.314	BOTH	3.0901
NC_002754	78293	79423	-	SSO0097	2448.98	5885.18	BOTH	2.40312
NC_002754	736262	736633	+	SSO0860	2379.57	556.316	BOTH	4.27738
NC_002754	140169	140723	-	SSO0169	2370.64	1242.27	BOTH	1.90831
NC_002754	1714872	1715066	+	SSO9180	2349.03	3325.36	BOTH	1.41563
NC_002754	969297	969539	+	SSO7239	2303.05	7921.25	BOTH	3.43946
NC_002754	500274	500432	+	SSO6175	2272.44	998.362	BOTH	2.27617
NC_002754	47785	48516	+	SSO0055	2218.8	757.253	BOTH	2.93007
NC_002754	417750	418706	+	SSO0485	2208.1	4372.88	BOTH	1.98038
NC_002754	2681354	2682670	-	SSO2938	2170.79	1457.19	BOTH	1.48971
NC_002754	397707	398309	-	SSO0464	2166.47	2386.8	BOTH	1.1017
NC_002754	42978	43367	+	SSO0048	2095.22	2050.55	BOTH	1.02178
NC_002754	127134	127763	+	SSO0151	1980.66	1752.46	BOTH	1.13021
NC_002754	416056	416394	+	SSO0482	1960.7	2638.98	BOTH	1.34594
NC_002754	203519	205267	-	SSO0235	1899.82	1346.26	BOTH	1.41119
NC_002754	1861881	1863143	+	SSO2044	1884.38	3709.64	BOTH	1.96863
NC_002754	642880	643587	+	SSO0758	1863.83	1631.3	BOTH	1.14255
NC_002754	12647	13030	-	SSO0014	1862.97	565.229	BOTH	3.29596
NC_002754	2010928	2011773	+	SSO2186	1838.85	1135.95	BOTH	1.61877
NC_002754	2209901	2210416	-	SSO2433	1828.83	2748.74	BOTH	1.503
NC_002754	176721	177188	+	SSO0203	1760.41	921.939	BOTH	1.90947
NC_002754	2743532	2744632	-	SSO3003	1750.54	1639.23	BOTH	1.06791
NC_002754	2404133	2404567	+	SSO2642	1733.51	2896.93	BOTH	1.67113
NC_002754	2611121	2612461	-	SSO2852	1713.77	1602.36	BOTH	1.06953
NC_002754	792761	793129	+	SSO0931	1708.83	2381.88	BOTH	1.39386
NC_002754	751957	754356	+	SSO0883	1705.21	832.634	BOTH	2.04797
NC_002754	601227	601661	-	SSO0696	1691.22	3044.96	BOTH	1.80045
NC_002754	968854	969285	+	SSO1126	1689.97	8864.66	BOTH	5.24546
NC_002754	574064	574576	+	SSO0665	1653.98	5616.06	BOTH	3.39549
NC_002754	2413574	2415247	-	SSO2656	1649.28	4559.61	BOTH	2.7646
NC_002754	993328	994557	+	SSO1152	1621.38	983.361	BOTH	1.64881
NC_002754	2408848	2409285	+	SSO2648	1604.5	2350.91	BOTH	1.4652
NC_002754	1065792	1066598	+	SSO1227	1562.94	863.523	BOTH	1.80995
NC_002754	624699	624920	-	SSO6418	1561.03	2505.61	BOTH	1.6051
NC_002754	924674	925195	-	SSO1067	1549.51	873.34	BOTH	1.77423
NC_002754	797497	797655	-	SSO6817	1548.83	1775.3	BOTH	1.14622
NC_002754	2960304	2960360	-	SSOs04	1547.22	8093.82	BOTH	5.23119
NC_002754	1830100	1830342	+	SSO9500	1518.9	3141.29	BOTH	2.06814
NC_002754	105256	106164	-	SSO0125	1512.61	576.32	BOTH	2.6246
NC_002754	1798337	1798930	+	SSO1986	1482.82	1817.92	BOTH	1.22599
NC_002754	2822074	2823936	+	SSO3066	1465.04	612.67	BOTH	2.39124
NC_002754	2313850	2314380	-	SSO2544	1464.52	1289.7	BOTH	1.13555
NC_002754	2932565	2932759	-	SSO12142	1440.07	3074.94	BOTH	2.13527
NC_002754	2068737	2069294	-	SSO2253	1396.44	6729.09	BOTH	4.81874
NC_002754	958388	958753	+	SSO1109	1381.81	1114.81	BOTH	1.23951
NC_002754	1798944	1799870	+	SSO1987	1369.56	920.444	BOTH	1.48793
NC_002754	394844	395194	-	SSO0458	1347.35	1305.91	BOTH	1.03173
NC_002754	641976	642161	-	SSO6453	1336.07	2694.56	BOTH	2.01678
NC_002754	958736	959071	-	SSO1110	1322.92	2099.94	BOTH	1.58735
NC_002754	2154229	2154594	+	SSO2359	1256.26	1743.55	BOTH	1.3879
NC_002754	2415240	2416775	-	SSO2657	1251.3	6099.31	BOTH	4.87439
NC_002754	80426	81109	+	SSO0099	1240.99	1971.07	BOTH	1.58831
NC_002754	972029	973135	+	SSO1131	1238.63	1638.03	BOTH	1.32245
NC_002754	2577155	2578105	+	SSO2816	1213.92	771.608	BOTH	1.57324
NC_002754	2356224	2356652	+	SSO2588	1194.99	1950.24	BOTH	1.632
NC_002754	629682	630131	-	SSO0741	1183.18	488.169	BOTH	2.42372
NC_002754	265543	267195	+	SSO0313	1160.22	221.562	BOTH	5.23655
NC_002754	1840170	1840364	-	SSO9535	1149.93	853.067	BOTH	1.348
NC_002754	630134	630784	-	SSO0742	1141.62	1020.73	BOTH	1.11844
NC_002754	502607	503623	+	SSO0570	1141.26	2907.96	BOTH	2.54803
NC_002754	270412	271047	+	SSO0316	1141.11	3289.48	BOTH	2.8827
NC_002754	371678	371830	+	SSO5826	1135.33	1368.43	BOTH	1.20531
NC_002754	2395167	2395547	+	SSO2631	1130.39	1320.17	BOTH	1.16789
NC_002754	302737	303792	-	SSO0356	1117.6	753.114	BOTH	1.48396
NC_002754	279044	279547	+	SSO0327	1117.09	837.971	BOTH	1.33308
NC_002754	1799863	1800333	+	SSO1988	1108.24	573.166	BOTH	1.93354
NC_002754	418707	419693	+	SSO0486	1100.51	654.534	BOTH	1.68136
NC_002754	2146765	2147961	+	SSO2353	1084.16	1962.98	BOTH	1.8106
NC_002754	1974141	1974575	+	SSO2146	1083.6	1287.79	BOTH	1.18844
NC_002754	735325	735717	+	SSO0858	1069.5	293.038	BOTH	3.6497
NC_002754	493405	495510	-	SSO0559	1065.45	2481.85	BOTH	2.3294
NC_002754	945251	946060	+	SSO1090	1061.06	2034.38	BOTH	1.91731
NC_002754	2190033	2190209	+	SSO10342	1052.15	453.302	BOTH	2.32108
NC_002754	1595237	1595479	-	SSO8861	1050.04	2853.23	BOTH	2.71726
NC_002754	1432890	1433741	-	SSO1586	1045.46	420.201	BOTH	2.48799
NC_002754	816329	816649	-	SSO0961	1039.23	2358.38	BOTH	2.26936
NC_002754	983163	984278	-	SSO1142	1031.43	1409.38	BOTH	1.36644
NC_002754	596824	597690	-	SSO0691	1020.69	1104.05	BOTH	1.08167
NC_002754	2907619	2908212	+	SSO3155	1019.38	596.658	BOTH	1.70848
NC_002754	851273	852463	+	SSO0992	1013.33	4426.61	BOTH	4.36839
NC_002754	2396744	2397097	+	SSO2633	999.445	1185.23	BOTH	1.18589
NC_002754	2740216	2741835	-	SSO3000	994.625	601.288	BOTH	1.65416
NC_002754	529769	530119	-	SSO0605	989.531	2266.37	BOTH	2.29035
NC_002754	876820	877941	-	SSO1018	976.486	1341.68	BOTH	1.37399
NC_002754	2969724	2971064	-	SSO3224	976.373	724.738	BOTH	1.34721
NC_002754	991959	993335	+	SSO1151	972.488	1323.83	BOTH	1.36128
NC_002754	1431061	1432560	+	SSO1584	959.716	1893.25	BOTH	1.97272
NC_002754	944625	945254	+	SSO1088	942.478	2476.42	BOTH	2.62756
NC_002754	699058	699834	+	SSO0814	941.93	908.614	BOTH	1.03667
NC_002754	623597	623977	-	SSO0730	926.352	1296.94	BOTH	1.40005
NC_002754	1727019	1728281	+	SSO1907	924.989	1707.01	BOTH	1.84544
NC_002754	503620	504222	+	SSO0571	912.769	1185.6	BOTH	1.2989
NC_002754	276282	277514	+	SSO0324	911.626	1851.54	BOTH	2.03103
NC_002754	499646	500287	+	SSO0566	897.146	475.662	BOTH	1.8861
NC_002754	278497	279063	+	SSO0326	894.247	1058.62	BOTH	1.18381
NC_002754	2416772	2417281	-	SSO2658	893.926	3891.02	BOTH	4.35273
NC_002754	563330	563821	+	SSO0651	869.923	1060.15	BOTH	1.21867
NC_002754	2275798	2276241	-	SSO2507	868.253	1235.05	BOTH	1.42245
NC_002754	627926	628651	-	SSO0738	866.515	2637.32	BOTH	3.0436
NC_002754	2189109	2189342	+	SSO10340	847.906	2403.72	BOTH	2.83489
NC_002754	2463617	2465053	+	SSO2712	843.461	2175.87	BOTH	2.57969
NC_002754	1113843	1116323	+	SSO1288	837.702	2095.63	BOTH	2.50164
NC_002754	502286	502573	+	SSO6179	837.685	2453.29	BOTH	2.92865
NC_002754	2043206	2044204	+	SSO2222	835.591	2456.45	BOTH	2.93978
NC_002754	304893	305294	+	SSO0359	831.548	1495.19	BOTH	1.79808
NC_002754	629156	629716	-	SSO0740	826.825	223.284	BOTH	3.70302
NC_002754	886455	886865	+	SSO1027	823.427	723.483	BOTH	1.13814
NC_002754	385794	386723	-	SSO0446	813.624	812.533	BOTH	1.00134
NC_002754	47249	47788	+	SSO0054	812.752	264.63	BOTH	3.07128
NC_002754	2575303	2577201	+	SSO2815	809.605	553.559	BOTH	1.46254
NC_002754	275795	276304	+	SSO0323	806.871	1338.87	BOTH	1.65933
NC_002754	2446903	2447271	+	SSO2690	806.427	828.136	BOTH	1.02692
NC_002754	2394008	2395165	+	SSO2629	802.911	1341.24	BOTH	1.67047
NC_002754	185592	186899	-	SSO0216	801.901	618.278	BOTH	1.29699
NC_002754	766078	767073	+	SSO0898	792.231	568.549	BOTH	1.39343
NC_002754	699834	700166	+	SSO0816	791.667	273.139	BOTH	2.8984
NC_002754	2134538	2135158	+	SSO2336	790.197	131.43	BOTH	6.01233
NC_002754	61275	61688	+	SSO0077	779.07	308.915	BOTH	2.52195
NC_002754	277514	278572	+	SSO0325	778.543	1265.92	BOTH	1.62601
NC_002754	88218	88610	-	SSO0108	775.423	332.99	BOTH	2.32867
NC_002754	2281312	2283303	-	SSO2514	773.455	529.486	BOTH	1.46076
NC_002754	979183	982992	-	SSO1141	764.931	1252.08	BOTH	1.63685
NC_002754	770599	771720	+	SSO0906	760.849	478.625	BOTH	1.58966
NC_002754	2210413	2211249	-	SSO2434	750.569	915.623	BOTH	1.21991
NC_002754	1606108	1606950	-	SSO1774	743.177	2000.12	BOTH	2.6913
NC_002754	421390	422607	+	SSO0489	736.836	199.155	BOTH	3.69981
NC_002754	1681749	1682180	+	SSO1865	733.612	1094.51	BOTH	1.49195
NC_002754	275424	275813	+	SSO0322	713.393	1613.56	BOTH	2.26181
NC_002754	611680	612735	-	SSO0719	713.354	2940.15	BOTH	4.12158
NC_002754	769622	770602	+	SSO0905	712.595	711.982	BOTH	1.00086
NC_002754	2618490	2620490	-	SSO2863	705.786	752.72	BOTH	1.0665
NC_002754	2356652	2357785	+	SSO2589	705.343	993.903	BOTH	1.40911
NC_002754	1962697	1963968	-	SSO2134	696.388	696.298	BOTH	1.00013
NC_002754	2153347	2154228	+	SSO2358	693.079	1586.54	BOTH	2.28912
NC_002754	953584	953883	+	SSO1100	693.038	204.044	BOTH	3.39651
NC_002754	2633493	2635001	-	SSO2881	687.474	90.2983	BOTH	7.61336
NC_002754	1422717	1424012	-	SSO1578	685.824	1107.38	BOTH	1.61466
NC_002754	1150918	1151769	+	SSO1320	684.839	1541.74	BOTH	2.25124
NC_002754	641071	641976	-	SSO0757	682.824	588.382	BOTH	1.16051
NC_002754	1587105	1588097	+	SSO1752	676.496	1061.68	BOTH	1.56939
NC_002754	577067	577486	+	SSO0670	672.308	2060.86	BOTH	3.06536
NC_002754	498258	499649	+	SSO0564	671.476	537.241	BOTH	1.24986
NC_002754	2608309	2609169	+	SSO2848	669.554	595.355	BOTH	1.12463
NC_002754	968295	968696	-	SSO1125	642.462	1497.43	BOTH	2.33076
NC_002754	220198	220551	+	SSO0255	641.246	544.548	BOTH	1.17757
NC_002754	1112517	1113728	+	SSO1287	637.928	304.805	BOTH	2.0929
NC_002754	2610021	2611082	+	SSO2850	629.371	200.143	BOTH	3.1446
NC_002754	2760407	2761441	-	SSO3014	626.678	719.811	BOTH	1.14861
NC_002754	2620566	2621144	+	SSO2864	624.337	2491.23	BOTH	3.99019
NC_002754	2959531	2960316	+	SSO3213	619.811	3160.94	BOTH	5.09985
NC_002754	691118	691417	-	SSO0806	616.45	97.7568	BOTH	6.30595
NC_002754	1424009	1424695	-	SSO1579	614.578	848.435	BOTH	1.38052
NC_002754	973251	973862	+	SSO1133	611.702	566.564	BOTH	1.07967
NC_002754	370522	370854	-	SSO0425	611.13	460.909	BOTH	1.32592
NC_002754	2395541	2396674	+	SSO2632	604.188	526.32	BOTH	1.14795
NC_002754	601664	602140	-	SSO0697	599.575	1558.23	BOTH	2.59889
NC_002754	459207	459617	+	SSO0529	596.028	392.286	BOTH	1.51937
NC_002754	664567	664836	+	SSO6503	583.53	253.871	BOTH	2.29853
NC_002754	527778	529298	-	SSO0604	579.26	1223.28	BOTH	2.1118
NC_002754	271082	272167	+	SSO0317	578.239	949.175	BOTH	1.64149
NC_002754	610623	610868	-	SSO6401	576.555	2570.17	BOTH	4.4578
NC_002754	2060221	2060892	+	SSO2246	570.197	1035.04	BOTH	1.81524
NC_002754	2720435	2720492	-	SSOs05	561.456	2709.46	BOTH	4.82578
NC_002754	1685257	1685937	+	SSO1870	550.611	1677.09	BOTH	3.04586
NC_002754	2152400	2153350	+	SSO2357	550.239	1456.96	BOTH	2.64786
NC_002754	2923351	2923839	+	SSO3177	549.356	346.687	BOTH	1.58459
NC_002754	775198	775977	-	SSO0910	538.865	345.483	BOTH	1.55974
NC_002754	233827	234093	+	SSO5544	538.648	1435.94	BOTH	2.66582
NC_002754	563750	564202	-	SSO0652	533.903	593.65	BOTH	1.11191
NC_002754	1982669	1983019	+	SSO2155	528.603	1078.11	BOTH	2.03954
NC_002754	1016716	1018521	+	SSO1175	527.689	1142.38	BOTH	2.16486
NC_002754	2324504	2326336	+	SSO2552	526.372	695.223	BOTH	1.32078
NC_002754	771711	771998	+	SSO6768	524.566	152.025	BOTH	3.45053
NC_002754	969608	970450	+	SSO1127	522.571	1837.17	BOTH	3.51563
NC_002754	300674	301030	-	SSO0352	518.025	199.365	BOTH	2.59837
NC_002754	605217	605381	-	SSO6391	516.173	452.314	BOTH	1.14118
NC_002754	272169	272882	+	SSO0318	512.702	453.077	BOTH	1.1316
NC_002754	2975459	2976436	+	SSO3231	512.615	1633.92	BOTH	3.18743
NC_002754	2581293	2581580	+	SSO11231	511.969	918.392	BOTH	1.79384
NC_002754	774064	775182	-	SSO0909	511.937	211.273	BOTH	2.42311
NC_002754	188153	188605	-	SSO0219	510.64	626.783	BOTH	1.22745
NC_002754	577462	577875	+	SSO0671	509.713	1645.49	BOTH	3.22826
NC_002754	574555	575757	-	SSO0666	508.502	1162.57	BOTH	2.28626
NC_002754	305563	306456	+	SSO0360	507.446	1483.93	BOTH	2.92431
NC_002754	623934	624209	-	SSO12356	506.688	613.486	BOTH	1.21078
NC_002754	2435615	2436109	-	SSO2677	500.119	307.551	BOTH	1.62613
NC_002754	2387230	2388240	-	SSO2621	498.36	1240.23	BOTH	2.48862
NC_002754	2357820	2358191	+	SSO2590	489.01	351.788	BOTH	1.39007
NC_002754	622874	623575	-	SSO0729	487.998	770.105	BOTH	1.57809
NC_002754	954677	954997	+	SSO1102	486.245	123.898	BOTH	3.92455
NC_002754	2987926	2988291	-	SSO3246	485.698	367.571	BOTH	1.32137
NC_002754	352910	353668	+	SSO0403	484.809	1310.99	BOTH	2.70415
NC_002754	1752576	1753430	-	SSO1933	483.514	411.608	BOTH	1.1747
NC_002754	745781	746833	-	SSO0874	481.272	903.382	BOTH	1.87707
NC_002754	369637	370518	+	SSO0422	477.918	433.434	BOTH	1.10263
NC_002754	745122	745781	-	SSO0873	471.283	345.314	BOTH	1.3648
NC_002754	1247084	1248040	+	SSO1399	470.701	1545.47	BOTH	3.28333
NC_002754	4500	5348	+	SSO0008	469.025	278.544	BOTH	1.68384
NC_002754	2137263	2138336	+	SSO2339	466.473	1531.86	BOTH	3.28393
NC_002754	551602	552057	+	SSO0637	466.365	730.507	BOTH	1.56639
NC_002754	174323	175930	-	SSO0201	466	718.689	BOTH	1.54225
NC_002754	892443	894620	+	SSO1033	465.203	552.928	BOTH	1.18857
NC_002754	909262	911556	-	SSO1052	463.58	2375.57	BOTH	5.1244
NC_002754	2479293	2480882	-	SSO2726	460.573	343.924	BOTH	1.33917
NC_002754	635111	635695	-	SSO0749	458.024	252.432	BOTH	1.81444
NC_002754	1381827	1383182	+	SSO1531	455.841	91.9174	BOTH	4.95924
NC_002754	2514624	2515853	-	SSO2759	455.204	269.079	BOTH	1.69171
NC_002754	136398	136799	+	SSO0164	453.806	883.693	BOTH	1.94729
NC_002754	85752	86957	+	SSO0104	452.445	1029.08	BOTH	2.27449
NC_002754	416431	416748	+	SSO0483	447.372	772.371	BOTH	1.72646
NC_002754	459610	460911	-	SSO0530	445.622	686.788	BOTH	1.54119
NC_002754	2209361	2209930	+	SSO2432	443.558	645.321	BOTH	1.45488
NC_002754	419671	420330	+	SSO0487	443.014	313.455	BOTH	1.41333
NC_002754	1708042	1709634	-	SSO1893	439.969	133.559	BOTH	3.29419
NC_002754	165619	166320	-	SSO0192	439.395	764.785	BOTH	1.74054
NC_002754	964453	965712	-	SSO1119	435.797	760.843	BOTH	1.74587
NC_002754	1863429	1866056	+	SSO2045	435.373	531.364	BOTH	1.22048
NC_002754	1430039	1430932	+	SSO1583	434.208	1253.06	BOTH	2.88586
NC_002754	917747	918091	+	SSO1057	432.891	333.207	BOTH	1.29916
NC_002754	1709631	1710356	-	SSO1894	428.201	311.254	BOTH	1.37573
NC_002754	1106938	1107909	-	SSO1282	425.758	544.303	BOTH	1.27843
NC_002754	957883	958260	+	SSO1108	420.464	674.841	BOTH	1.60499
NC_002754	2003859	2007092	-	SSO2181	418.481	876.123	BOTH	2.09358
NC_002754	2280182	2281294	+	SSO2511	418.153	504.805	BOTH	1.20723
NC_002754	55477	56172	-	SSO0067	417.493	643.179	BOTH	1.54057
NC_002754	2609154	2610017	+	SSO2849	417.393	256.016	BOTH	1.63034
NC_002754	1800334	1801737	+	SSO1989	417.185	230.953	BOTH	1.80637
NC_002754	233371	233670	+	SSO0273	416.917	1009.85	BOTH	2.42218
NC_002754	1246615	1247103	+	SSO1398	414.578	720.672	BOTH	1.73833
NC_002754	1653672	1654013	+	SSO1823	413.452	935.178	BOTH	2.26188
NC_002754	58397	58795	-	SSO0072	411.323	776.445	BOTH	1.88768
NC_002754	820609	820878	-	SSO6877	409.175	307.411	BOTH	1.33103
NC_002754	2935330	2936877	+	SSO3189	407.393	1321.06	BOTH	3.24273
NC_002754	609895	610611	-	SSO0716	404.181	787.179	BOTH	1.94759
NC_002754	970658	971971	+	SSO1129	401.716	1213.85	BOTH	3.02167
NC_002754	87870	88241	+	SSO0107	400.31	158.23	BOTH	2.52992
NC_002754	56376	56798	-	SSO0068	400.238	517.53	BOTH	1.29306
NC_002754	610870	611673	-	SSO0718	399.874	1701.57	BOTH	4.25528
NC_002754	2513756	2514040	-	SSO11071	399.157	422.044	BOTH	1.05734
NC_002754	767033	767422	+	SSO0900	398.224	249.181	BOTH	1.59813
NC_002754	2054954	2056717	-	SSO2241	397.857	492.407	BOTH	1.23765
NC_002754	2622248	2623072	-	SSO2868	395.663	325.213	BOTH	1.21663
NC_002754	58779	59324	-	SSO0073	392.181	600.719	BOTH	1.53174
NC_002754	1589036	1589734	-	SSO1755	391.604	350.983	BOTH	1.11573
NC_002754	643584	644639	-	SSO0760	389.437	163.422	BOTH	2.38302
NC_002754	1121211	1121786	-	SSO1292	389.3	662.976	BOTH	1.70299
NC_002754	2178312	2178830	-	SSO2390	388.617	959.55	BOTH	2.46914
NC_002754	41790	42533	-	SSO0046	388.12	248.408	BOTH	1.56243
NC_002754	627207	627908	-	SSO0737	387.839	876.418	BOTH	2.25975
NC_002754	946071	947213	+	SSO1091	386.773	664.263	BOTH	1.71745
NC_002754	2624431	2624895	+	SSO2870	385.635	364.431	BOTH	1.05818
NC_002754	793122	794162	-	SSO0934	385.34	289.361	BOTH	1.33169
NC_002754	735135	735338	+	SSO6687	381.502	236.323	BOTH	1.61433
NC_002754	1775885	1776751	+	SSO1960	381.178	1522.88	BOTH	3.9952
NC_002754	908102	908302	+	SSO7114	377.742	1079.84	BOTH	2.85867
NC_002754	56786	57235	-	SSO0069	377.375	933.147	BOTH	2.47273
NC_002754	2353036	2354019	-	SSO2585	376.323	722.815	BOTH	1.92073
NC_002754	829350	829407	-	SSOs02	373.808	918.259	BOTH	2.4565
NC_002754	174056	174355	+	SSO0200	372.864	104.443	BOTH	3.57003
NC_002754	602147	602800	-	SSO0698	371.134	541.601	BOTH	1.45931
NC_002754	2990014	2990940	-	SSO3251	367.875	329.199	BOTH	1.11748
NC_002754	660623	660952	-	SSO0775	367.76	349.82	BOTH	1.05128
NC_002754	448668	448982	-	SSO0520	367.723	1427.27	BOTH	3.88137
NC_002754	924309	924665	+	SSO1066	366.078	134.073	BOTH	2.73044
NC_002754	2990967	2991218	-	SSO12252	366.078	199.817	BOTH	1.83206
NC_002754	294927	295943	-	SSO0344	364.197	244.161	BOTH	1.49163
NC_002754	909102	909272	+	SSO7115	362.686	214.379	BOTH	1.6918
NC_002754	357792	358250	+	SSO0408	361.131	601.562	BOTH	1.66577
NC_002754	606655	607014	-	SSO0707	360.867	640.761	BOTH	1.77561
NC_002754	959104	959568	-	SSO1111	359.629	492.354	BOTH	1.36906
NC_002754	300252	300518	-	SSO5671	358.775	99.736	BOTH	3.59725
NC_002754	933302	933703	+	SSO1075	358.619	977.637	BOTH	2.72612
NC_002754	603389	603844	-	SSO0700	355.93	700.473	BOTH	1.96801
NC_002754	2467764	2469173	+	SSO2716	355.436	609.754	BOTH	1.71551
NC_002754	299322	299591	-	SSO5668	354.149	388.619	BOTH	1.09733
NC_002754	301042	301506	-	SSO0353	353.128	238.74	BOTH	1.47913
NC_002754	609437	609859	-	SSO0715	352.046	425.471	BOTH	1.20857
NC_002754	2621884	2622237	-	SSO2867	351.124	402.11	BOTH	1.14521
NC_002754	782382	783422	+	SSO0919	350.573	487.827	BOTH	1.39151
NC_002754	489285	489770	-	SSO0554	350.132	522.599	BOTH	1.49258
NC_002754	189049	189375	-	SSO0221	350.002	1173.31	BOTH	3.3523
NC_002754	907818	908105	+	SSO7111	346.711	1430.18	BOTH	4.125
NC_002754	680593	681300	-	SSO0796	345.145	434.642	BOTH	1.2593
NC_002754	2205820	2206350	+	SSO2427	344.698	649.602	BOTH	1.88455
NC_002754	2989274	2990017	+	SSO3250	342.609	169.572	BOTH	2.02043
NC_002754	973849	974541	+	SSO1134	342.146	794.579	BOTH	2.32234
NC_002754	173686	173949	-	SSO5410	341.258	1840.8	BOTH	5.39416
NC_002754	56169	56369	-	SSO5140	340.784	463.526	BOTH	1.36017
NC_002754	604809	605210	-	SSO0703	340.784	398.66	BOTH	1.16983
NC_002754	1106211	1106948	-	SSO1281	337.552	239.275	BOTH	1.41073
NC_002754	2514006	2514560	-	SSO2758	336.796	474.826	BOTH	1.40983
NC_002754	2018018	2018821	+	SSO2195	336.165	1220.24	BOTH	3.62989
NC_002754	300522	300683	-	SSO5672	334.314	110.156	BOTH	3.03492
NC_002754	359364	360611	+	SSO0412	334.022	544.528	BOTH	1.63022
NC_002754	1330173	1331039	-	SSO1469	333.257	238.856	BOTH	1.39522
NC_002754	59335	59832	-	SSO0074	332.85	527.785	BOTH	1.58566
NC_002754	775996	776793	-	SSO0911	331.332	166.158	BOTH	1.99407
NC_002754	90305	90655	+	SSO0111	330.746	369.485	BOTH	1.11713
NC_002754	224131	224382	-	SSO5522	329.744	862.948	BOTH	2.61702
NC_002754	942230	942550	+	SSO1086	329.635	709.129	BOTH	2.15126
NC_002754	2059760	2060224	+	SSO2245	329.35	831.647	BOTH	2.52511
NC_002754	496480	498258	+	SSO0563	328.42	255.014	BOTH	1.28785
NC_002754	2971123	2972241	-	SSO3225	328.22	315.797	BOTH	1.03934
NC_002754	2058349	2059272	+	SSO2243	327.843	404.9	BOTH	1.23504
NC_002754	185259	185567	-	SSO0215	327.341	290.549	BOTH	1.12663
NC_002754	806988	807533	-	SSO0951	327.16	1505.47	BOTH	4.60164
NC_002754	395505	396395	-	SSO0460	323.505	434.956	BOTH	1.34451
NC_002754	495893	496477	+	SSO0561	320.853	333.778	BOTH	1.04028
NC_002754	57588	58385	-	SSO0071	318.559	936.189	BOTH	2.93883
NC_002754	635752	636378	-	SSO0750	318.234	190.735	BOTH	1.66846
NC_002754	2290030	2290965	-	SSO2521	314.504	647.19	BOTH	2.05781
NC_002754	2150698	2152398	+	SSO2356	314.434	904.993	BOTH	2.87817
NC_002754	146792	146989	+	SSO5343	310.611	335.009	BOTH	1.07855
NC_002754	289591	290643	-	SSO0337	309.09	143.59	BOTH	2.15259
NC_002754	255258	256103	+	SSO0297	309.061	611.553	BOTH	1.97874
NC_002754	852826	853197	-	SSO0995	309.056	387.673	BOTH	1.25438
NC_002754	1682173	1682562	-	SSO1866	308.967	291.213	BOTH	1.06096
NC_002754	236451	237041	-	SSO0278	308.826	547.255	BOTH	1.77205
NC_002754	2382794	2383825	-	SSO2618	307.177	1872.22	BOTH	6.09491
NC_002754	739093	739923	-	SSO0865	303.102	242.211	BOTH	1.25139
NC_002754	608957	609430	-	SSO0713	302.14	352.404	BOTH	1.16636
NC_002754	607020	607436	-	SSO0708	300.355	436.071	BOTH	1.45185
NC_002754	1424702	1427854	-	SSO1580	298.802	227.729	BOTH	1.3121
NC_002754	57232	57591	-	SSO0070	296.324	998.895	BOTH	3.37096
NC_002754	602793	603383	-	SSO0699	295.234	458.074	BOTH	1.55156
NC_002754	298872	299315	-	SSO0349	294.541	312.656	BOTH	1.0615
NC_002754	2275200	2275796	+	SSO2506	292.556	465.056	BOTH	1.58963
NC_002754	295940	296596	-	SSO0345	291.213	159.496	BOTH	1.82583
NC_002754	2360494	2361018	+	SSO2595	291.052	289.055	BOTH	1.00691
NC_002754	516107	518941	+	SSO0589	290.668	394.341	BOTH	1.35667
NC_002754	597866	598435	-	SSO0692	290.048	394.619	BOTH	1.36053
NC_002754	802115	802492	-	SSO0944	289.983	258.372	BOTH	1.12235
NC_002754	943500	944810	-	SSO1089	288.98	774.403	BOTH	2.67978
NC_002754	605387	605935	-	SSO0704	288.87	374.815	BOTH	1.29752
NC_002754	2718875	2719477	+	SSO2975	288.642	273.459	BOTH	1.05553
NC_002754	325069	326844	-	SSO0382	285.689	607.67	BOTH	2.12703
NC_002754	608266	608955	-	SSO0712	284.797	448.286	BOTH	1.57406
NC_002754	1420804	1421211	-	SSO1574	282.21	151.05	BOTH	1.86832
NC_002754	104246	105148	+	SSO0124	281.422	337.412	BOTH	1.19896
NC_002754	309522	310148	+	SSO0364	281.038	420.632	BOTH	1.49671
NC_002754	598477	598743	-	SSO6374	278.221	231.854	BOTH	1.19998
NC_002754	356770	357768	+	SSO0407	278.156	738.064	BOTH	2.65342
NC_002754	2140629	2141474	+	SSO2345	277.818	372.982	BOTH	1.34254
NC_002754	1124576	1126654	-	SSO1297	277.29	97.0475	BOTH	2.85726
NC_002754	391248	392390	+	SSO0452	276.515	584.324	BOTH	2.11317
NC_002754	251593	252129	-	SSO0294	276.345	414.104	BOTH	1.4985
NC_002754	974538	975455	+	SSO1135	275.882	458.405	BOTH	1.6616
NC_002754	2933310	2933801	-	SSO3186	273.881	439.327	BOTH	1.60408
NC_002754	2512557	2513759	-	SSO2757	273.279	336.006	BOTH	1.22954
NC_002754	379208	379837	+	SSO0437	272.844	429.168	BOTH	1.57294
NC_002754	132412	132582	+	SSO5317	271.257	1230.05	BOTH	4.53463
NC_002754	143428	143940	+	SSO0172	271.257	956.077	BOTH	3.52462
NC_002754	199416	199601	-	SSO5478	271.208	616.93	BOTH	2.27475
NC_002754	607438	607782	-	SSO0709	269.649	386.737	BOTH	1.43422
NC_002754	1848518	1849708	-	SSO2035	269.36	294.79	BOTH	1.09441
NC_002754	198996	199412	-	SSO0230	269.283	283.637	BOTH	1.0533
NC_002754	1107906	1109516	-	SSO1283	267.98	529.297	BOTH	1.97513
NC_002754	1402589	1403125	-	SSO1553	266.854	202.737	BOTH	1.31626
NC_002754	2511689	2512588	-	SSO2756	266.812	284.509	BOTH	1.06633
NC_002754	2916831	2917580	-	SSO3168	265.122	169.783	BOTH	1.56153
NC_002754	199626	199922	+	SSO5479	264.369	546.587	BOTH	2.06752
NC_002754	140783	142498	-	SSO0170	263.966	1320.75	BOTH	5.0035
NC_002754	776890	777141	+	SSO6778	263.247	187.192	BOTH	1.4063
NC_002754	654081	655298	+	SSO0769	262.892	125.899	BOTH	2.08813
NC_002754	2510372	2511685	+	SSO2755	261.763	307.569	BOTH	1.17499
NC_002754	1104508	1104819	-	SSO1279	261.072	218.809	BOTH	1.19315
NC_002754	2196594	2197565	+	SSO2416	260.733	632.542	BOTH	2.42601
NC_002754	624928	625755	-	SSO0732	260.698	370.063	BOTH	1.41951
NC_002754	301577	302740	+	SSO0354	260.692	188.428	BOTH	1.38351
NC_002754	2908209	2908952	-	SSO3157	260.643	47.8781	BOTH	5.44389
NC_002754	955002	956138	+	SSO1103	259.437	66.9776	BOTH	3.8735
NC_002754	2812735	2813703	+	SSO3058	254.855	1694.93	BOTH	6.65056
NC_002754	603841	604257	-	SSO0701	254.162	365.079	BOTH	1.4364
NC_002754	1964891	1965910	-	SSO2137	254.053	322.172	BOTH	1.26813
NC_002754	655295	655744	-	SSO0770	253.567	75.0084	BOTH	3.38051
NC_002754	2574051	2574533	-	SSO2813	253.053	723.181	BOTH	2.85782
NC_002754	397123	397767	-	SSO0463	251.768	60.4814	BOTH	4.16273
NC_002754	2054626	2054952	+	SSO2238	251.737	209.829	BOTH	1.19972
NC_002754	2521316	2523199	+	SSO2764	251.614	581.353	BOTH	2.31049
NC_002754	604254	604799	-	SSO0702	250.116	301.246	BOTH	1.20443
NC_002754	296598	297119	-	SSO0346	249.371	185.772	BOTH	1.34235
NC_002754	2333935	2334618	+	SSO2560	248.905	248.154	BOTH	1.00303
NC_002754	652597	653070	+	SSO0767	247.835	155.846	BOTH	1.59026
NC_002754	608048	608269	-	SSO6397	247.461	185.07	BOTH	1.33712
NC_002754	2166139	2166465	-	SSO2375	245.662	528.804	BOTH	2.15257
NC_002754	2012683	2013399	-	SSO2190	244.918	721.002	BOTH	2.94385
NC_002754	488848	489288	-	SSO0553	244.443	415.633	BOTH	1.70032
NC_002754	1124400	1124699	+	SSO1296	244.161	53.0285	BOTH	4.60435
NC_002754	250595	251596	-	SSO0293	244.134	587.717	BOTH	2.40736
NC_002754	2589587	2590462	-	SSO2829	244.047	130.045	BOTH	1.87664
NC_002754	957454	957804	+	SSO1107	243.384	555.311	BOTH	2.28163
NC_002754	372723	373058	+	SSO0428	243.195	831.452	BOTH	3.41887
NC_002754	279779	283225	+	SSO0328	243.021	395.08	BOTH	1.6257
NC_002754	385500	385661	+	SSO5866	242.604	110.156	BOTH	2.20238
NC_002754	139591	140172	-	SSO0168	240.878	70.7126	BOTH	3.40645
NC_002754	1776732	1777148	+	SSO1961	239.662	262.074	BOTH	1.09351
NC_002754	783434	783847	+	SSO0920	239.521	578.568	BOTH	2.41552
NC_002754	768014	768232	-	SSO6759	238.624	800.954	BOTH	3.35656
NC_002754	1964022	1964894	-	SSO2135	238.256	214.633	BOTH	1.11006
NC_002754	2436090	2436854	+	SSO2676	237.68	85.1711	BOTH	2.79062
NC_002754	1081711	1083105	+	SSO1256	237.524	249.4	BOTH	1.05
NC_002754	1018510	1018917	-	SSO1176	237.116	85.1032	BOTH	2.78621
NC_002754	177662	178051	-	SSO0206	236.985	203.778	BOTH	1.16296
NC_002754	786061	786549	+	SSO0925	236.7	309.345	BOTH	1.30691
NC_002754	143942	145231	+	SSO0173	236.568	669.531	BOTH	2.83018
NC_002754	763524	763581	+	SSOs01	235.305	84.6707	BOTH	2.77906
NC_002754	2580109	2581296	+	SSO2819	234.922	421.759	BOTH	1.79532
NC_002754	283168	284619	+	SSO0329	234.624	484.459	BOTH	2.06483
NC_002754	1688968	1689495	-	SSO1875	234.594	184.709	BOTH	1.27008
NC_002754	2720217	2721179	-	SSO2977	234.467	733.406	BOTH	3.12797
NC_002754	2110381	2111379	-	SSO2308	234.405	393.473	BOTH	1.6786
NC_002754	2452342	2452662	-	SSO2699	234.108	95.4556	BOTH	2.45254
NC_002754	952759	953226	+	SSO1098	233.848	131.241	BOTH	1.78182
NC_002754	626461	627210	-	SSO0736	233.681	281.466	BOTH	1.20449
NC_002754	2406310	2406882	+	SSO2645	233.356	314.694	BOTH	1.34856
NC_002754	458188	459210	+	SSO0528	232.621	268.422	BOTH	1.1539
NC_002754	358711	359355	+	SSO0411	232.618	637.307	BOTH	2.73972
NC_002754	1801739	1802593	+	SSO1990	232.463	174.173	BOTH	1.33467
NC_002754	180731	181381	+	SSO0209	232.199	540.91	BOTH	2.32951
NC_002754	2535036	2535455	-	SSO2778	231.781	233.852	BOTH	1.00894
NC_002754	188611	188985	-	SSO0220	231.493	451.71	BOTH	1.95129
NC_002754	392359	392811	-	SSO0454	231.294	110.088	BOTH	2.101
NC_002754	620585	622795	-	SSO0728	231.279	329.007	BOTH	1.42256
NC_002754	684470	685837	+	SSO0801	230.594	236.019	BOTH	1.02353
NC_002754	2623145	2624443	+	SSO2869	230.274	245.095	BOTH	1.06436
NC_002754	1690648	1691007	+	SSO1877	229.861	187.713	BOTH	1.22453
NC_002754	219233	220078	+	SSO0254	229.83	257.13	BOTH	1.11878
NC_002754	1664860	1665348	+	SSO1838	229.634	255.029	BOTH	1.11059
NC_002754	1421343	1422710	-	SSO1577	229.394	152.745	BOTH	1.50181
NC_002754	323985	325076	-	SSO0381	228.996	293.139	BOTH	1.2801
NC_002754	390329	391183	+	SSO0451	226.502	206.37	BOTH	1.09755
NC_002754	77945	78065	-	SSOr02	226.296	123.473	BOTH	1.83276
NC_002754	377758	378120	-	SSO0435	226.058	350.983	BOTH	1.55262
NC_002754	176021	176698	+	SSO0202	225.755	144.864	BOTH	1.55839
NC_002754	531560	531859	-	SSO0609	225.158	228.945	BOTH	1.01682
NC_002754	905678	906418	+	SSO1047	225.095	956.678	BOTH	4.2501
NC_002754	1009834	1011405	-	SSO1171	225.066	1134.8	BOTH	5.04206
NC_002754	2433256	2435610	+	SSO2675	224.582	345.25	BOTH	1.5373
NC_002754	598757	599206	-	SSO0693	224.39	186.599	BOTH	1.20253
NC_002754	1660009	1660527	+	SSO1831	224.017	267.741	BOTH	1.19518
NC_002754	526402	527775	+	SSO0602	223.866	387.419	BOTH	1.73059
NC_002754	61719	62819	+	SSO0078	223.123	209.89	BOTH	1.06305
NC_002754	311070	312485	-	SSO0366	222.96	289.761	BOTH	1.29961
NC_002754	243065	243316	-	SSO5559	222.8	261.3	BOTH	1.1728
NC_002754	664160	664516	-	SSO0781	222.356	366.569	BOTH	1.64856
NC_002754	696609	697838	+	SSO0810	222.265	257.551	BOTH	1.15876
NC_002754	2381905	2382801	-	SSO2617	221.771	1039.6	BOTH	4.68771
NC_002754	2084832	2085617	+	SSO2276	221.769	304.214	BOTH	1.37176
NC_002754	804848	805915	+	SSO0949	221.687	866.279	BOTH	3.90767
NC_002754	2320573	2324499	+	SSO2551	220.861	813.032	BOTH	3.6812
NC_002754	2813690	2814661	+	SSO3059	219.944	569.921	BOTH	2.59121
NC_002754	2190206	2190841	-	SSO2406	219.883	209.134	BOTH	1.0514
NC_002754	2138337	2138969	-	SSO2342	219.424	383.864	BOTH	1.74941
NC_002754	1109513	1110514	-	SSO1284	219.048	546.714	BOTH	2.49586
NC_002754	2926180	2927595	-	SSO3180	218.873	1184.15	BOTH	5.41024
NC_002754	49815	50180	-	SSOr01	218.541	40.2533	BOTH	5.42914
NC_002754	2588673	2589065	+	SSO2827	217.373	142.911	BOTH	1.52104
NC_002754	701525	702574	+	SSO0819	216.767	171.733	BOTH	1.26223
NC_002754	2096394	2096783	+	SSO2286	215.945	527.27	BOTH	2.44169
NC_002754	767419	767742	+	SSO0901	215.945	133.852	BOTH	1.61331
NC_002754	1079407	1080216	-	SSO1254	215.945	216.469	BOTH	1.00243
NC_002754	504260	505792	+	SSO0572	215.804	354.501	BOTH	1.6427
NC_002754	1965885	1966292	-	SSO2138	215.733	294.81	BOTH	1.36655
NC_002754	933741	934313	+	SSO1076	214.965	117.694	BOTH	1.82648
NC_002754	2441975	2442394	-	SSO2681	214.711	159.744	BOTH	1.34409
NC_002754	178048	179415	-	SSO0207	214.619	372.939	BOTH	1.73768
NC_002754	934340	935677	-	SSO1077	214.202	109.903	BOTH	1.94901
NC_002754	1684224	1684499	-	SSO9092	214.067	217.527	BOTH	1.01616
NC_002754	306624	307280	+	SSO0361	213.775	300.042	BOTH	1.40354
NC_002754	216135	217109	-	SSO0250	213.774	250.919	BOTH	1.17376
NC_002754	51207	52205	-	SSO0061	212.702	151.836	BOTH	1.40087
NC_002754	2578274	2580106	+	SSO2817	212.34	305.009	BOTH	1.43642
NC_002754	1980262	1982619	+	SSO2154	211.585	296.324	BOTH	1.40049
NC_002754	482449	483393	+	SSO0550	211.42	215.627	BOTH	1.0199
NC_002754	2192668	2192886	-	SSO10348	211.409	223.294	BOTH	1.05622
NC_002754	172438	173670	-	SSO0199	210.445	849.813	BOTH	4.03817
NC_002754	833436	834233	+	SSO0975	208.801	172.572	BOTH	1.20993
NC_002754	2154682	2156040	-	SSO2360	208.286	311.941	BOTH	1.49766
NC_002754	605928	606647	-	SSO0705	206.707	279.937	BOTH	1.35427
NC_002754	394148	394873	+	SSO0456	206.426	119.471	BOTH	1.72783
NC_002754	291654	294356	-	SSO0341	204.936	256.557	BOTH	1.25189
NC_002754	858177	859004	+	SSO1000	204.678	483.588	BOTH	2.36268
NC_002754	25702	26757	-	SSO0028	204.493	625.128	BOTH	3.05697
NC_002754	2087490	2088791	-	SSO2279	204.335	1163.05	BOTH	5.69187
NC_002754	250020	250589	-	SSO0292	203.064	345.474	BOTH	1.70131
NC_002754	2397949	2399346	+	SSO2635	202.908	521.923	BOTH	2.57222
NC_002754	2192855	2193247	-	SSO2409	202.427	186.735	BOTH	1.08404
NC_002754	2465096	2466040	+	SSO2713	202.28	148.143	BOTH	1.36543
NC_002754	210097	211104	+	SSO0242	202.148	160.979	BOTH	1.25574
NC_002754	566686	567546	-	SSO0656	201.849	531.329	BOTH	2.63231
NC_002754	1650236	1651222	-	SSO1818	200.848	442.476	BOTH	2.20304
NC_002754	2380930	2381904	-	SSO2616	200.308	953.165	BOTH	4.75849
NC_002754	677873	678988	-	SSO0794	199.923	189.591	BOTH	1.0545
NC_002754	348688	349437	+	SSO0397	199.821	531.945	BOTH	2.66211
NC_002754	343538	343828	-	SSO5763	199.767	147.367	BOTH	1.35557
NC_002754	2405747	2406313	+	SSO2644	199.263	246.417	BOTH	1.23664
NC_002754	241015	242643	-	SSO0283	198.897	72.7767	BOTH	2.73298
NC_002754	2046576	2047151	-	SSO2227	198.699	290.96	BOTH	1.46433
NC_002754	898750	899520	-	SSO1038	197.403	161.391	BOTH	1.22314
NC_002754	89415	90317	+	SSO0110	197.148	237.069	BOTH	1.20249
NC_002754	2711847	2712287	-	SSO2967	197.043	76.8529	BOTH	2.5639
NC_002754	380199	380588	-	SSO0438	196.233	359.139	BOTH	1.83017
NC_002754	236056	236454	+	SSO0277	194.837	191.034	BOTH	1.01991
NC_002754	2314425	2315126	+	SSO2545	194.658	114.787	BOTH	1.69582
NC_002754	2189569	2189883	-	SSO2405	194.419	578.373	BOTH	2.97488
NC_002754	2156037	2157185	-	SSO2363	194.031	388.217	BOTH	2.0008
NC_002754	2581577	2582515	-	SSO2820	193.637	320.941	BOTH	1.65743
NC_002754	249129	249473	-	SSO0291	192.785	245.595	BOTH	1.27393
NC_002754	653092	654084	+	SSO0768	192.154	146.763	BOTH	1.30928
NC_002754	919947	920393	-	SSO1061	190.534	186.458	BOTH	1.02186
NC_002754	2986787	2987929	+	SSO3245	190.288	119.757	BOTH	1.58895
NC_002754	122786	124021	+	SSO0144	189.947	95.4132	BOTH	1.99079
NC_002754	2400889	2403138	+	SSO2639	189.609	386.693	BOTH	2.03942
NC_002754	815475	815990	-	SSO0960	188.324	591.41	BOTH	3.14039
NC_002754	908305	909105	+	SSO1050	188.284	313.974	BOTH	1.66755
NC_002754	353640	354944	-	SSO0404	188.046	247.413	BOTH	1.31571
NC_002754	81106	82512	+	SSO0100	187.735	189.215	BOTH	1.00788
NC_002754	355785	356777	+	SSO0406	187.63	549.719	BOTH	2.92979
NC_002754	2945488	2946087	-	SSO3201	187.584	682.569	BOTH	3.63874
NC_002754	2494349	2495101	-	SSO2740	187.439	212.922	BOTH	1.13596
NC_002754	932640	933317	+	SSO1074	187.152	186.487	BOTH	1.00356
NC_002754	624206	624718	-	SSO0731	187.068	220.986	BOTH	1.18131
NC_002754	434783	435706	+	SSO0503	186.965	306.463	BOTH	1.63915
NC_002754	1676422	1677357	-	SSO1859	186.783	206.985	BOTH	1.10816
NC_002754	199932	200582	+	SSO0231	186.555	261.796	BOTH	1.40332
NC_002754	2319642	2319944	-	SSO2550	186.439	107.746	BOTH	1.73036
NC_002754	70054	71214	+	SSO0087	186.371	428.767	BOTH	2.30061
NC_002754	1575540	1576487	-	SSO1739	185.968	444.993	BOTH	2.39285
NC_002754	2053505	2054482	+	SSO2237	185.562	495.347	BOTH	2.66944
NC_002754	2400659	2400844	-	SSO10802	184.83	649.655	BOTH	3.51488
NC_002754	739961	740287	-	SSO0866	184.643	95.3963	BOTH	1.93553
NC_002754	2985474	2985797	-	SSO3242	184.219	616.958	BOTH	3.34904
NC_002754	1428130	1430016	+	SSO1581	184.154	214.247	BOTH	1.16341
NC_002754	859006	859809	+	SSO1001	184.144	770.135	BOTH	4.18224
NC_002754	2012181	2012690	-	SSO2188	183.934	262.972	BOTH	1.42971
NC_002754	2093422	2094543	+	SSO2284	183.765	577.136	BOTH	3.14063
NC_002754	2379966	2380937	-	SSO2615	183.42	383.98	BOTH	2.09345
NC_002754	798966	799664	+	SSO0940	183.383	158.521	BOTH	1.15683
NC_002754	2959013	2959447	-	SSO3212	182.486	371.597	BOTH	2.03631
NC_002754	1294537	1295502	-	SSO1442	181.787	254.044	BOTH	1.39748
NC_002754	256072	257013	+	SSO0299	181.467	286.656	BOTH	1.57966
NC_002754	358247	358633	-	SSO0410	181.237	573.358	BOTH	3.16358
NC_002754	164888	165574	-	SSO0191	181.18	402.42	BOTH	2.22111
NC_002754	1882345	1882842	+	SSO2063	181.081	144.585	BOTH	1.25242
NC_002754	147003	147278	+	SSO5345	180.58	149.111	BOTH	1.21104
NC_002754	832542	833411	+	SSO0974	179.706	178.007	BOTH	1.00954
NC_002754	1899747	1900520	-	SSO2087	179.117	467.194	BOTH	2.60832
NC_002754	193195	195144	-	SSO0227	178.647	422.632	BOTH	2.36573
NC_002754	2164806	2165375	-	SSO2373	178.06	154.596	BOTH	1.15178
NC_002754	919106	919945	-	SSO1060	177.692	154.639	BOTH	1.14907
NC_002754	189372	190559	-	SSO0223	177.482	310.672	BOTH	1.75044
NC_002754	506253	507260	-	SSO0576	177.297	124.68	BOTH	1.42202
NC_002754	2399552	2400400	+	SSO2636	177.029	1192.71	BOTH	6.73739
NC_002754	373055	374035	+	SSO0429	176.982	332.371	BOTH	1.87799
NC_002754	2300632	2301045	+	SSO2532	175.885	331.303	BOTH	1.88363
NC_002754	917303	917719	+	SSO1056	175.863	153.429	BOTH	1.14621
NC_002754	422610	423494	+	SSO0490	175.489	46.5025	BOTH	3.77375
NC_002754	2940120	2941649	-	SSO3194	175.296	105.153	BOTH	1.66706
NC_002754	362362	363606	-	SSO0417	175.184	243.67	BOTH	1.39094
NC_002754	243568	244716	-	SSO0286	175.161	739.593	BOTH	4.22235
NC_002754	2499504	2499842	-	SSO2745	174.285	114.259	BOTH	1.52534
NC_002754	1078983	1079435	+	SSO1253	174.09	100.469	BOTH	1.73279
NC_002754	886897	887595	+	SSO1028	173.868	184.645	BOTH	1.06198
NC_002754	67859	68911	-	SSO0084	173.084	367.974	BOTH	2.12599
NC_002754	525978	526376	+	SSO0601	172.972	238.186	BOTH	1.37702
NC_002754	2917555	2918382	-	SSO3169	172.547	193.135	BOTH	1.11932
NC_002754	1248041	1248832	+	SSO1400	172.319	372.736	BOTH	2.16305
NC_002754	2759451	2760410	+	SSO3013	172.306	177.314	BOTH	1.02907
NC_002754	625758	626504	-	SSO0735	172.293	220.095	BOTH	1.27745
NC_002754	852456	852767	+	SSO0994	171.925	782.126	BOTH	4.54922
NC_002754	2456673	2458376	+	SSO2704	171.691	186.761	BOTH	1.08777
NC_002754	52207	53313	-	SSO0063	171.429	259.113	BOTH	1.51149
NC_002754	297579	297767	-	SSO5663	171.385	123.331	BOTH	1.38964
NC_002754	1715787	1717454	-	SSO1900	171.202	86.9156	BOTH	1.96975
NC_002754	267173	267997	+	SSO0314	170.976	223.265	BOTH	1.30583
NC_002754	186945	187526	-	SSO0217	169.936	152.953	BOTH	1.11103
NC_002754	636769	637074	-	SSO0752	169.086	425.177	BOTH	2.51456
NC_002754	299584	300255	-	SSO0351	169.028	107.663	BOTH	1.56998
NC_002754	2400401	2400892	+	SSO2637	168.893	582.16	BOTH	3.44691
NC_002754	1827013	1827495	+	SSO2012	168.642	309.75	BOTH	1.83673
NC_002754	2358170	2358685	-	SSO2591	168.571	109.381	BOTH	1.54113
NC_002754	2466033	2467679	+	SSO2714	167.931	104.36	BOTH	1.60914
NC_002754	916860	917306	+	SSO1055	167.538	227.464	BOTH	1.35768
NC_002754	249752	250030	-	SSO5577	167.493	212.957	BOTH	1.27144
NC_002754	62827	64047	+	SSO0079	167.45	157.652	BOTH	1.06215
NC_002754	2420009	2420575	-	SSO2663	167.271	336.933	BOTH	2.01429
NC_002754	2624903	2626015	-	SSO2871	166.469	75.6928	BOTH	2.19928
NC_002754	147343	149652	+	SSO0176	166.025	117.794	BOTH	1.40945
NC_002754	1882843	1883277	+	SSO2064	164.614	89.9974	BOTH	1.8291
NC_002754	2295958	2297181	-	SSO2527	164.57	164.951	BOTH	1.00232
NC_002754	859806	860780	+	SSO1003	164.517	588.031	BOTH	3.57429
NC_002754	860974	862209	+	SSO1004	164.509	318.529	BOTH	1.93624
NC_002754	1100189	1101541	+	SSO1275	164.456	473.642	BOTH	2.88005
NC_002754	2616522	2617922	-	SSO2860	164.186	71.4386	BOTH	2.29828
NC_002754	1545396	1546784	+	SSO1693	163.739	90.4806	BOTH	1.80966
NC_002754	1986907	1989909	-	SSO2162	163.724	316.84	BOTH	1.93521
NC_002754	1968238	1968660	+	SSO2140	163.567	513.116	BOTH	3.13704
NC_002754	2957760	2959016	+	SSO3211	163.548	554.661	BOTH	3.39144
NC_002754	2341282	2342274	+	SSO2569	162.752	373.7	BOTH	2.29613
NC_002754	2096761	2097717	+	SSO2287	162.647	350.247	BOTH	2.15342
NC_002754	2094540	2096369	+	SSO2285	162.371	316.546	BOTH	1.94951
NC_002754	2976437	2977540	-	SSO3232	161.88	413.564	BOTH	2.55476
NC_002754	313213	313614	-	SSO0368	161.797	78.2867	BOTH	2.06673
NC_002754	2397387	2397809	-	SSO2634	161.729	57.8849	BOTH	2.79397
NC_002754	783840	784595	+	SSO0921	161.559	277.219	BOTH	1.71591
NC_002754	2109632	2110384	-	SSO2306	161.514	179.303	BOTH	1.11014
NC_002754	272869	274047	-	SSO0320	161.034	273.444	BOTH	1.69805
NC_002754	127806	129608	+	SSO0152	161.018	256.76	BOTH	1.5946
NC_002754	2208915	2209334	-	SSO2431	160.21	446.46	BOTH	2.78671
NC_002754	2733830	2734393	+	SSO2991	160.044	418.439	BOTH	2.61453
NC_002754	406229	406510	+	SSO5909	159.585	510.417	BOTH	3.19841
NC_002754	2097678	2098781	-	SSO2288	158.829	184.635	BOTH	1.16248
NC_002754	906384	907376	+	SSO1048	158.49	569.222	BOTH	3.59154
NC_002754	1648543	1648803	-	SSO8998	158.194	861.017	BOTH	5.44279
NC_002754	2029637	2030356	+	SSO2205	157.04	1087.76	BOTH	6.92663
NC_002754	1123604	1124347	+	SSO1294	156.966	207.968	BOTH	1.32492
NC_002754	947203	947754	-	SSO1092	156.951	114.277	BOTH	1.37343
NC_002754	2161170	2162300	+	SSO2368	156.717	615.598	BOTH	3.92807
NC_002754	5351	6334	-	SSO0009	156.165	476.371	BOTH	3.05043
NC_002754	2492589	2494097	+	SSO2738	155.812	131.276	BOTH	1.1869
NC_002754	211105	212514	+	SSO0244	155.419	119.449	BOTH	1.30113
NC_002754	1876867	1878735	-	SSO2059	155.332	371.669	BOTH	2.39274
NC_002754	2192042	2192656	-	SSO2408	154.918	128.213	BOTH	1.20829
NC_002754	377589	377816	-	SSO5844	154.192	121.65	BOTH	1.26751
NC_002754	590460	591716	-	SSO0686	153.446	328.56	BOTH	2.14121
NC_002754	449346	449660	-	SSO0521	153.286	270.083	BOTH	1.76195
NC_002754	84916	85734	-	SSO0103	153.244	88.9297	BOTH	1.72321
NC_002754	1900584	1902404	-	SSO2088	151.979	296.232	BOTH	1.94916
NC_002754	2108586	2109635	-	SSO2305	151.367	372.122	BOTH	2.45841
NC_002754	2059246	2059656	-	SSO2244	151.319	221.976	BOTH	1.46694
NC_002754	989495	989941	-	SSO1149	151.113	426.611	BOTH	2.82313
NC_002754	136780	137088	+	SSO0165	150.672	177.284	BOTH	1.17662
NC_002754	2193240	2193617	-	SSO2410	149.676	248.491	BOTH	1.66019
NC_002754	633223	633849	-	SSO0746	148.785	312.743	BOTH	2.10198
NC_002754	385258	385404	-	SSO5865	148.664	394.773	BOTH	2.65547
NC_002754	1634878	1635063	+	SSO8958	148.607	423.93	BOTH	2.85269
NC_002754	2326298	2327317	-	SSO2553	148.536	48.0104	BOTH	3.09383
NC_002754	634524	635147	-	SSO0748	148.531	81.6931	BOTH	1.81816
NC_002754	1674961	1675590	-	SSO1857	148.351	229.68	BOTH	1.54823
NC_002754	1968668	1970377	-	SSO2141	148.055	268.945	BOTH	1.81652
NC_002754	1823352	1825286	+	SSO2008	147.713	460.116	BOTH	3.11494
NC_002754	1515235	1516986	-	SSO1662	147.71	41.769	BOTH	3.53636
NC_002754	348369	348683	+	SSO0396	147.528	322.782	BOTH	2.18794
NC_002754	382252	382617	-	SSO0442	147.503	142.304	BOTH	1.03654
NC_002754	2143909	2144421	-	SSO2349	147.331	684.665	BOTH	4.64713
NC_002754	1002143	1003558	+	SSO1162	147.257	160.365	BOTH	1.08901
NC_002754	54626	55480	-	SSO0066	147.095	206.936	BOTH	1.40682
NC_002754	746826	748166	-	SSO0876	146.991	842.338	BOTH	5.73056
NC_002754	1480658	1482070	-	SSO1629	146.836	113.37	BOTH	1.29519
NC_002754	1487906	1489453	+	SSO1636	146.307	116.664	BOTH	1.25408
NC_002754	1231762	1232895	-	SSO1389	146.172	326.198	BOTH	2.2316
NC_002754	695680	696612	+	SSO0809	145.63	183.038	BOTH	1.25688
NC_002754	284612	285646	+	SSO0330	145.465	232.964	BOTH	1.60151
NC_002754	2164305	2164847	+	SSO2372	145.236	230.686	BOTH	1.58836
NC_002754	862206	863093	+	SSO1005	144.839	214.747	BOTH	1.48266
NC_002754	2160251	2161186	+	SSO2367	144.701	465.773	BOTH	3.21885
NC_002754	1295499	1295951	-	SSO1443	144.535	373.016	BOTH	2.5808
NC_002754	1198232	1198675	+	SSO1362	144.352	133.506	BOTH	1.08124
NC_002754	2572959	2573759	-	SSO2812	143.855	470.961	BOTH	3.27385
NC_002754	29591	30088	-	SSO0033	143.79	200.003	BOTH	1.39094
NC_002754	2084231	2084881	+	SSO2275	143.698	264.452	BOTH	1.84033
NC_002754	2071040	2071489	-	SSO2255	143.579	212.421	BOTH	1.47947
NC_002754	86950	87813	-	SSO0106	143.463	258.738	BOTH	1.80351
NC_002754	2297189	2298469	-	SSO2528	143.221	212.956	BOTH	1.4869
NC_002754	1731693	1731971	-	SSO9221	142.725	385.504	BOTH	2.70103
NC_002754	828181	829350	+	SSO0969	142.634	514.737	BOTH	3.60879
NC_002754	583766	584650	-	SSO0680	142.597	155.295	BOTH	1.08905
NC_002754	1896115	1896651	-	SSO2081	142.355	173.756	BOTH	1.22059
NC_002754	1881105	1882334	+	SSO2062	141.997	99.3651	BOTH	1.42904
NC_002754	1849776	1850858	+	SSO2036	141.57	686.503	BOTH	4.8492
NC_002754	2107986	2108585	-	SSO2303	141.228	217.878	BOTH	1.54274
NC_002754	901138	901704	+	SSO1041	141.069	102.47	BOTH	1.37668
NC_002754	779052	779477	+	SSO0916	140.516	293.394	BOTH	2.08797
NC_002754	732720	733019	+	SSO0853	140.508	46.8034	BOTH	3.00209
NC_002754	2083299	2084168	+	SSO2274	140.389	332.402	BOTH	2.36772
NC_002754	1728311	1728613	-	SSO1908	140.257	378.481	BOTH	2.69848
NC_002754	803980	804876	+	SSO0947	140.111	484.404	BOTH	3.45728
NC_002754	2172218	2174068	+	SSO2386	139.997	935.313	BOTH	6.68097
NC_002754	834557	835240	+	SSO0976	139.796	194.66	BOTH	1.39246
NC_002754	1635126	1635656	-	SSO1805	139.734	574.833	BOTH	4.11378
NC_002754	389485	390195	-	SSO0450	139.468	232.31	BOTH	1.66568
NC_002754	2930867	2931259	-	SSO3183	139.347	230.911	BOTH	1.65708
NC_002754	200640	202016	+	SSO0232	138.757	154.66	BOTH	1.11461
NC_002754	213501	214310	-	SSO0246	138.738	195.889	BOTH	1.41194
NC_002754	2007306	2008547	+	SSO2182	138.677	175.703	BOTH	1.26699
NC_002754	68859	69437	-	SSO0085	138.294	168.2	BOTH	1.21625
NC_002754	1683320	1683934	+	SSO1868	138.205	216.05	BOTH	1.56326
NC_002754	1978700	1979764	+	SSO2153	137.799	64.1667	BOTH	2.14752
NC_002754	2643850	2644194	+	SSO2891	137.704	97.0351	BOTH	1.41911
NC_002754	34685	35257	-	SSO0039	137.632	133.748	BOTH	1.02904
NC_002754	748150	749340	-	SSO0878	137.146	911.723	BOTH	6.64784
NC_002754	1366323	1366796	-	SSO1513	137.038	152.782	BOTH	1.11488
NC_002754	1989946	1990365	-	SSO2163	136.971	518.922	BOTH	3.78856
NC_002754	361565	361765	+	SSO5798	136.658	152.1	BOTH	1.113
NC_002754	2334605	2335153	-	SSO2561	136.096	111.626	BOTH	1.21922
NC_002754	1896687	1897190	-	SSO2083	136.079	163.038	BOTH	1.19811
NC_002754	2752144	2754315	+	SSO3009	135.93	98.8154	BOTH	1.37559
NC_002754	2642979	2643782	+	SSO2890	135.798	993.295	BOTH	7.3145
NC_002754	507232	507624	-	SSO0577	135.611	110.351	BOTH	1.2289
NC_002754	1667701	1669113	+	SSO1842	135.405	86.3983	BOTH	1.56722
NC_002754	537792	538802	-	SSO0618	134.907	153.113	BOTH	1.13495
NC_002754	636420	636761	-	SSO0751	134.618	190.919	BOTH	1.41822
NC_002754	234061	235572	-	SSO0274	134.48	132.159	BOTH	1.01756
NC_002754	2011770	2012114	+	SSO2187	134.449	394.556	BOTH	2.93461
NC_002754	2342279	2343103	-	SSO2570	134.121	129.784	BOTH	1.03342
NC_002754	2460253	2460654	-	SSO2707	132.79	78.9749	BOTH	1.68142
NC_002754	2920754	2921149	+	SSO3174	132.402	218.507	BOTH	1.65032
NC_002754	1880014	1881159	+	SSO2061	132.356	101.639	BOTH	1.30221
NC_002754	2200206	2201762	-	SSO2422	132.257	494.835	BOTH	3.74145
NC_002754	658336	660396	+	SSO0774	132.019	50.8437	BOTH	2.59656
NC_002754	215580	216095	-	SSO0249	131.91	533.1	BOTH	4.04138
NC_002754	942577	943503	-	SSO1087	131.757	176.389	BOTH	1.33875
NC_002754	577862	578560	-	SSO0673	131.235	269.348	BOTH	2.05241
NC_002754	2459292	2460002	+	SSO2706	131.207	91.3479	BOTH	1.43634
NC_002754	490144	490731	+	SSO0556	130.889	252.791	BOTH	1.93134
NC_002754	772004	774010	+	SSO0907	130.449	35.8417	BOTH	3.63959
NC_002754	2644191	2645294	-	SSO2892	130.349	79.0039	BOTH	1.64991
NC_002754	824180	825628	+	SSO0966	130.133	208.266	BOTH	1.60041
NC_002754	697868	698608	+	SSO0813	129.509	251.748	BOTH	1.94387
NC_002754	361016	361558	+	SSO0415	129.328	224.317	BOTH	1.73448
NC_002754	960707	961612	+	SSO1114	129.281	182.386	BOTH	1.41077
NC_002754	1528090	1529271	+	SSO1675	128.178	244.076	BOTH	1.90419
NC_002754	810524	811621	-	SSO0956	128.151	364.484	BOTH	2.84418
NC_002754	2197562	2198356	+	SSO2418	127.991	183.055	BOTH	1.43021
NC_002754	802675	803556	-	SSO0946	127.902	158.333	BOTH	1.23792
NC_002754	756108	757385	+	SSO0888	127.269	941.393	BOTH	7.39689
NC_002754	106161	107822	-	SSO0127	127.124	63.5909	BOTH	1.99909
NC_002754	918081	918722	-	SSO1059	126.876	60.6563	BOTH	2.09172
NC_002754	1071441	1072424	+	SSO1238	126.407	77.8838	BOTH	1.62302
NC_002754	2973081	2973752	-	SSO3227	125.711	117.029	BOTH	1.07418
NC_002754	2444755	2445102	-	SSO2688	125.595	156.422	BOTH	1.24544
NC_002754	393598	394158	+	SSO0455	125.487	218.353	BOTH	1.74005
NC_002754	2203048	2203587	+	SSO2424	125.408	282.947	BOTH	2.25621
NC_002754	2697813	2698394	+	SSO2953	125.263	167.809	BOTH	1.33965
NC_002754	2932955	2933272	-	SSO3185	124.949	138.553	BOTH	1.10887
NC_002754	2044137	2044967	+	SSO2223	124.525	140.915	BOTH	1.13162
NC_002754	1449666	1450007	+	SSO1602	124.515	469.005	BOTH	3.76664
NC_002754	1871635	1873161	-	SSO2053	124.278	29.8503	BOTH	4.16337
NC_002754	7555	10479	+	SSO0011	124.118	158.955	BOTH	1.28068
NC_002754	93241	94617	-	SSO0114	124.078	408.727	BOTH	3.29411
NC_002754	800987	802123	+	SSO0943	123.831	145.513	BOTH	1.1751
NC_002754	2423999	2425000	-	SSO2668	123.705	392.985	BOTH	3.1768
NC_002754	297116	297589	-	SSO0347	123.006	74.7127	BOTH	1.64639
NC_002754	2294204	2295541	-	SSO2526	122.788	133.683	BOTH	1.08872
NC_002754	2139827	2140612	+	SSO2344	122.753	325.07	BOTH	2.64816
NC_002754	1575173	1575508	+	SSO1736	122.626	141.423	BOTH	1.15329
NC_002754	456948	458195	+	SSO0527	122.438	214.819	BOTH	1.75451
NC_002754	495585	495887	+	SSO0560	122.297	107.974	BOTH	1.13265
NC_002754	2000418	2001149	+	SSO2177	122.251	276.387	BOTH	2.26082
NC_002754	786874	788313	+	SSO0927	122.129	106.874	BOTH	1.14274
NC_002754	2165372	2166136	-	SSO2374	122.058	186.707	BOTH	1.52966
NC_002754	878058	878894	+	SSO1019	121.775	476.405	BOTH	3.91217
NC_002754	2409368	2411635	-	SSO2651	121.759	319.976	BOTH	2.62794
NC_002754	2741925	2743337	-	SSO3002	121.65	151.992	BOTH	1.24942
NC_002754	297799	298875	-	SSO0348	121.266	80.0212	BOTH	1.51542
NC_002754	564264	565319	+	SSO0653	121.223	400.465	BOTH	3.30352
NC_002754	539379	539696	-	SSO0620	121.146	40.8915	BOTH	2.96263
NC_002754	2141705	2142397	+	SSO2346	120.904	110.788	BOTH	1.09131
NC_002754	90572	93199	-	SSO0112	120.232	306.99	BOTH	2.55331
NC_002754	2952434	2952814	+	SSO3206	120.158	252.888	BOTH	2.10463
NC_002754	23195	23842	-	SSO0024	119.569	160.964	BOTH	1.3462
NC_002754	11767	11946	-	SSO5027	119.489	89.9179	BOTH	1.32887
NC_002754	505789	506220	-	SSO0575	119.369	128.088	BOTH	1.07304
NC_002754	1690351	1690563	-	SSO9115	119.226	85.0794	BOTH	1.40135
NC_002754	651906	652583	+	SSO0766	118.993	223.315	BOTH	1.87672
NC_002754	2358713	2359396	+	SSO2592	118.833	104.055	BOTH	1.14202
NC_002754	994637	995728	+	SSO1153	118.809	179.38	BOTH	1.50981
NC_002754	287131	288432	-	SSO0334	118.687	118.945	BOTH	1.00218
NC_002754	2293755	2294201	-	SSO2524	118.649	139.418	BOTH	1.17505
NC_002754	2519626	2520489	-	SSO2762	118.27	70.4485	BOTH	1.67881
NC_002754	486104	488752	+	SSO0552	118.203	111.389	BOTH	1.06118
NC_002754	2318128	2319645	+	SSO2549	118.072	135.51	BOTH	1.14769
NC_002754	1279842	1280669	+	SSO1427	117.883	354.275	BOTH	3.00531
NC_002754	2364890	2366251	+	SSO2601	117.327	151.793	BOTH	1.29376
NC_002754	966944	968284	-	SSO1123	117.232	119.199	BOTH	1.01678
NC_002754	2030357	2030998	+	SSO2206	117.189	514.232	BOTH	4.38807
NC_002754	151633	152913	+	SSO0180	116.587	97.8929	BOTH	1.19096
NC_002754	2015157	2015987	-	SSO2192	116.522	163.638	BOTH	1.40436
NC_002754	206480	207904	-	SSO0240	116.201	679.153	BOTH	5.84464
NC_002754	1152745	1153746	-	SSO1322	115.946	130.811	BOTH	1.1282
NC_002754	1974673	1975056	+	SSO2148	115.845	361.509	BOTH	3.12062
NC_002754	330962	331702	-	SSO0387	115.753	102.771	BOTH	1.12632
NC_002754	2945105	2945491	-	SSO3200	115.617	316.527	BOTH	2.73772
NC_002754	1364918	1366330	-	SSO1512	115.537	103.091	BOTH	1.12074
NC_002754	2351776	2352945	-	SSO2583	115.097	223.701	BOTH	1.94359
NC_002754	374318	375382	+	SSO0430	114.927	224.584	BOTH	1.95414
NC_002754	767703	768017	-	SSO0902	114.896	86.0752	BOTH	1.33484
NC_002754	195129	196571	-	SSO3254	114.751	398.708	BOTH	3.47454
NC_002754	2621546	2621887	-	SSO2866	114.665	159.369	BOTH	1.38986
NC_002754	890439	891647	+	SSO1031	114.527	59.8995	BOTH	1.91199
NC_002754	2139054	2139866	+	SSO2343	114.427	491.32	BOTH	4.29375
NC_002754	1985101	1985769	-	SSO2159	114.396	231.799	BOTH	2.02629
NC_002754	2708912	2709121	-	SSO11575	114.348	185.106	BOTH	1.61879
NC_002754	398312	398935	-	SSO0465	113.925	262.482	BOTH	2.304
NC_002754	2190850	2191893	-	SSO2407	113.764	144.364	BOTH	1.26898
NC_002754	513790	514164	-	SSO0585	113.558	126.715	BOTH	1.11586
NC_002754	384378	385271	+	SSO0445	113.335	307.773	BOTH	2.71561
NC_002754	2933794	2934696	-	SSO3187	113.257	318.11	BOTH	2.80873
NC_002754	2162590	2163129	-	SSO2370	113.251	219.287	BOTH	1.93629
NC_002754	1415376	1415939	+	SSO1568	112.72	252.388	BOTH	2.23907
NC_002754	1062806	1063813	-	SSO1223	112.514	81.3817	BOTH	1.38255
NC_002754	1983028	1983879	+	SSO2156	112.433	367.27	BOTH	3.26656
NC_002754	809864	810391	-	SSO0955	112.389	555.175	BOTH	4.93974
NC_002754	2407744	2408673	-	SSO2647	112.384	41.9468	BOTH	2.67921
NC_002754	1415881	1416306	+	SSO1569	112.129	89.6256	BOTH	1.25108
NC_002754	1346285	1347400	-	SSO1491	111.765	342.987	BOTH	3.06882
NC_002754	891622	892419	+	SSO1032	111.598	42.558	BOTH	2.62227
NC_002754	901697	902134	+	SSO1042	111.423	55.4288	BOTH	2.01021
NC_002754	2345762	2347282	+	SSO2575	111.309	254.979	BOTH	2.29073
NC_002754	683080	683778	-	SSO0799	110.969	218.19	BOTH	1.96622
NC_002754	1348773	1349345	+	SSO1495	110.95	55.6479	BOTH	1.99378
NC_002754	813804	815459	+	SSO0959	110.633	163.438	BOTH	1.4773
NC_002754	682698	683090	-	SSO0798	110.335	162.975	BOTH	1.47709
NC_002754	2174074	2174925	+	SSO2387	110.304	335.609	BOTH	3.04258
NC_002754	1951498	1953090	+	SSO2126	110.182	284.095	BOTH	2.57842
NC_002754	2169430	2169765	+	SSO2382	110.029	424.681	BOTH	3.85972
NC_002754	1731193	1731696	+	SSO1911	109.515	253.752	BOTH	2.31705
NC_002754	2626555	2627742	-	SSO2874	109.426	64.568	BOTH	1.69475
NC_002754	1906371	1906922	+	SSO2092	109.381	181.314	BOTH	1.65764
NC_002754	911795	913708	+	SSO1053	109.304	118.749	BOTH	1.08641
NC_002754	264668	264982	-	SSO0312	109.138	108.033	BOTH	1.01022
NC_002754	743017	743940	+	SSO0871	108.907	140.731	BOTH	1.29221
NC_002754	231116	231613	-	SSO0270	108.753	243.753	BOTH	2.24135
NC_002754	976832	978007	+	SSO1138	108.707	255.026	BOTH	2.346
NC_002754	243318	243557	-	SSO5561	108.692	235.458	BOTH	2.16628
NC_002754	507602	509320	-	SSO0579	108.688	58.4645	BOTH	1.85905
NC_002754	2924258	2924584	+	SSO3178	108.303	163.929	BOTH	1.51362
NC_002754	2406950	2407765	-	SSO2646	108.29	92.4777	BOTH	1.17098
NC_002754	531252	531563	-	SSO0608	108.249	84.9076	BOTH	1.27491
NC_002754	788300	789469	+	SSO0928	108.157	73.1876	BOTH	1.4778
NC_002754	2364144	2364893	+	SSO2600	108.145	180.205	BOTH	1.66632
NC_002754	1400951	1401979	-	SSO1552	108.035	62.7146	BOTH	1.72265
NC_002754	138497	139618	-	SSO0167	107.857	55.2971	BOTH	1.9505
NC_002754	2910849	2911883	-	SSO3161	107.242	67.6973	BOTH	1.58414
NC_002754	1904282	1906378	+	SSO2091	107.179	40.4055	BOTH	2.6526
NC_002754	806139	806999	+	SSO0950	106.543	109.415	BOTH	1.02696
NC_002754	2030995	2031663	+	SSO2207	106.132	248.652	BOTH	2.34284
NC_002754	1934808	1935950	-	SSO2111	105.951	60.8772	BOTH	1.7404
NC_002754	1287313	1288251	-	SSO1435	105.88	297.443	BOTH	2.80925
NC_002754	1825283	1826815	+	SSO2010	105.761	167.572	BOTH	1.58445
NC_002754	197205	199007	+	SSO0228	105.493	261.939	BOTH	2.483
NC_002754	2212210	2212797	-	SSO2436	105.475	400.301	BOTH	3.79523
NC_002754	2142445	2142906	-	SSO2347	105.448	109.89	BOTH	1.04212
NC_002754	13920	15314	-	SSO0016	105.325	142.054	BOTH	1.34872
NC_002754	2048608	2049474	-	SSO2229	105.307	169.129	BOTH	1.60606
NC_002754	829696	830091	+	SSO0970	104.919	84.0142	BOTH	1.24882
NC_002754	796129	797463	-	SSO0938	104.689	248.951	BOTH	2.37802
NC_002754	2132280	2133047	+	SSO2332	104.598	66.3757	BOTH	1.57585
NC_002754	2378160	2379053	+	SSO2612	104.252	121.469	BOTH	1.16514
NC_002754	797721	798959	+	SSO0939	104.086	59.119	BOTH	1.76061
NC_002754	1384983	1386137	+	SSO1533	104.027	116.058	BOTH	1.11565
NC_002754	190547	193189	-	SSO0225	103.928	114.102	BOTH	1.09789
NC_002754	518925	519524	-	SSO0591	103.653	42.4228	BOTH	2.44334
NC_002754	2924591	2925370	-	SSO3179	103.653	155.716	BOTH	1.50227
NC_002754	2061575	2062390	+	SSO2247	103.632	181.904	BOTH	1.75528
NC_002754	811637	813073	-	SSO0957	103.629	412.166	BOTH	3.9773
NC_002754	2206949	2208520	+	SSO2429	103.412	169.399	BOTH	1.6381
NC_002754	784602	784970	+	SSO0922	103.232	132.149	BOTH	1.28012
NC_002754	1279025	1279870	+	SSO1426	103.02	322.455	BOTH	3.13001
NC_002754	1366799	1367608	-	SSO1514	102.8	104.605	BOTH	1.01756
NC_002754	2142903	2143901	-	SSO2348	102.633	272.239	BOTH	2.65255
NC_002754	1689573	1690343	-	SSO1876	102.063	66.1174	BOTH	1.54366
NC_002754	2045359	2045628	-	SSO10051	101.734	119.378	BOTH	1.17343
NC_002754	26805	27947	+	SSO0029	101.643	86.2931	BOTH	1.17788
NC_002754	1975089	1977278	+	SSO2150	101.642	292.746	BOTH	2.88017
NC_002754	644710	646629	+	SSO0761	101.539	90.2781	BOTH	1.12474
NC_002754	949342	951909	-	SSO1095	100.976	122.148	BOTH	1.20967
NC_002754	416732	417616	+	SSO0484	100.725	166.002	BOTH	1.64807
NC_002754	619850	620578	-	SSO0726	100.715	113.382	BOTH	1.12577
NC_002754	2351114	2351713	-	SSO2582	100.63	177.991	BOTH	1.76877
NC_002754	233034	233282	+	SSO5542	100.601	211.669	BOTH	2.10406
NC_002754	1168340	1169653	-	SSO1333	100.577	130.229	BOTH	1.29482
NC_002754	2355342	2356199	+	SSO2587	100.472	275.864	BOTH	2.74568
NC_002754	985130	985957	-	SSO1144	100.461	355.361	BOTH	3.5373
NC_002754	1782833	1783108	-	SSO9378	100.148	138.836	BOTH	1.38631
NC_002754	2908988	2909233	+	SSO12093	100.072	32.6156	BOTH	3.06822
NC_002754	2201886	2203055	+	SSO2423	99.6668	433.036	BOTH	4.34484
NC_002754	543534	543788	+	SSO6264	99.5886	78.6612	BOTH	1.26605
NC_002754	2169053	2169472	+	SSO2381	99.5402	421.263	BOTH	4.23209
NC_002754	443033	443440	+	SSO0509	99.5039	168.172	BOTH	1.69011
NC_002754	2361442	2362596	-	SSO2597	99.2411	178.159	BOTH	1.79521
NC_002754	2675378	2675872	+	SSO2930	99.1164	96.2757	BOTH	1.02951
NC_002754	2198301	2200124	-	SSO2420	98.8799	134.922	BOTH	1.36451
NC_002754	2404567	2405754	+	SSO2643	98.6656	152.25	BOTH	1.54309
NC_002754	700784	701518	+	SSO0818	98.6	198.657	BOTH	2.01477
NC_002754	2308155	2308748	-	SSO2539	98.4475	404.06	BOTH	4.10432
NC_002754	715707	716276	+	SSO0834	98.3495	38.5882	BOTH	2.54869
NC_002754	2158360	2160012	+	SSO2365	98.083	267.465	BOTH	2.72692
NC_002754	1193091	1194272	+	SSO1355	97.9972	82.1584	BOTH	1.19278
NC_002754	2106526	2107314	-	SSO2299	97.9825	105.811	BOTH	1.0799
NC_002754	2626022	2626558	-	SSO2872	97.9592	43.9221	BOTH	2.2303
NC_002754	1553115	1553609	+	SSO1705	97.8949	92.5029	BOTH	1.05829
NC_002754	12050	12673	+	SSO0013	97.8672	77.8135	BOTH	1.25771
NC_002754	800089	801021	+	SSO0942	97.6727	80.8808	BOTH	1.20761
NC_002754	2315129	2315824	+	SSO2546	97.5474	56.4471	BOTH	1.72812
NC_002754	825625	826563	+	SSO0967	97.4166	206.471	BOTH	2.11947
NC_002754	2589077	2589493	-	SSO2828	97.1492	53.7417	BOTH	1.80771
NC_002754	2972253	2973071	-	SSO3226	97.1355	124.654	BOTH	1.2833
NC_002754	242664	243029	-	SSO0284	96.9981	68.2227	BOTH	1.42179
NC_002754	1662175	1662567	+	SSO1834	96.9278	83.4235	BOTH	1.16188
NC_002754	329319	330797	-	SSO0386	96.832	388.021	BOTH	4.00716
NC_002754	887650	889623	+	SSO1029	96.6609	197.657	BOTH	2.04485
NC_002754	1324545	1325180	-	SSO1465	96.1565	35.1276	BOTH	2.73735
NC_002754	961609	962664	+	SSO1115	96.1117	261.605	BOTH	2.72189
NC_002754	187602	188081	+	SSO0218	96.0954	172.343	BOTH	1.79345
NC_002754	2107321	2107989	-	SSO2301	95.9324	109.8	BOTH	1.14455
NC_002754	326885	327829	-	SSO0383	95.7926	116.743	BOTH	1.21871
NC_002754	2344828	2345217	-	SSO2573	95.6801	60.1226	BOTH	1.59142
NC_002754	46297	47328	+	SSO0052	95.5848	100.668	BOTH	1.05318
NC_002754	1679250	1680446	+	SSO1863	95.2538	89.8543	BOTH	1.06009
NC_002754	1876243	1876875	+	SSO2058	95.2476	52.0123	BOTH	1.83125
NC_002754	196577	196831	-	SSO5468	94.8463	699.271	BOTH	7.37267
NC_002754	126291	126647	-	SSO0150	94.8463	260.396	BOTH	2.74545
NC_002754	225950	226273	-	SSO0260	94.3758	110.156	BOTH	1.1672
NC_002754	152828	153853	+	SSO0181	93.6181	213.84	BOTH	2.28417
NC_002754	2745789	2748695	-	SSO3006	93.5092	125.915	BOTH	1.34655
NC_002754	1604963	1605760	-	SSO1773	92.8724	100.631	BOTH	1.08354
NC_002754	705741	708023	-	SSO0825	92.6963	30.5089	BOTH	3.03834
NC_002754	568520	569194	-	SSO0658	92.5203	143.766	BOTH	1.55389
NC_002754	835237	835521	+	SSO6904	92.4395	67.9541	BOTH	1.36032
NC_002754	1127121	1128389	-	SSO1299	92.3678	181.667	BOTH	1.96678
NC_002754	807634	808389	-	SSO0952	92.0907	330.376	BOTH	3.58751
NC_002754	2145310	2145849	+	SSO2351	91.9764	190.339	BOTH	2.06943
NC_002754	378187	378990	-	SSO0436	91.8571	177.651	BOTH	1.93399
NC_002754	1984523	1984906	-	SSO2158	91.7765	141.397	BOTH	1.54067
NC_002754	2534652	2535008	-	SSO2777	91.7009	86.0235	BOTH	1.066
NC_002754	2460870	2461895	+	SSO2708	91.6818	109.01	BOTH	1.189
NC_002754	1827452	1827823	+	SSO2013	91.4862	68.4238	BOTH	1.33705
NC_002754	1701327	1702997	-	SSO1886	91.3403	100.792	BOTH	1.10348
NC_002754	2050756	2051163	-	SSO2232	91.2472	89.3415	BOTH	1.02133
NC_002754	936420	938927	+	SSO1079	91.1307	118.258	BOTH	1.29767
NC_002754	1455422	1455709	+	SSO8475	90.8767	165.954	BOTH	1.82615
NC_002754	1053475	1054089	+	SSO1214	90.5914	19.232	BOTH	4.71046
NC_002754	1466644	1467852	+	SSO1618	90.2359	182.902	BOTH	2.02693
NC_002754	530119	530592	-	SSO0606	90.2047	91.3479	BOTH	1.01267
NC_002754	2716493	2718865	+	SSO2973	90.1635	124.956	BOTH	1.38589
NC_002754	1360281	1361546	+	SSO1505	90.1305	70.2603	BOTH	1.28281
NC_002754	1008947	1009840	-	SSO1170	89.9528	171.449	BOTH	1.90599
NC_002754	995700	996191	+	SSO1154	89.8892	82.5231	BOTH	1.08926
NC_002754	1936374	1937183	+	SSO2112	89.7903	161.989	BOTH	1.80408
NC_002754	559125	559973	+	SSO0645	89.7353	129.211	BOTH	1.43991
NC_002754	817144	820644	+	SSO0963	89.6099	70.1356	BOTH	1.27767
NC_002754	27944	28660	+	SSO0031	89.3896	54.5044	BOTH	1.64004
NC_002754	2085729	2087216	+	SSO2277	89.2803	115.558	BOTH	1.29433
NC_002754	387452	388036	+	SSO0447	89.1833	204.31	BOTH	2.2909
NC_002754	594271	595011	-	SSO0688	88.9424	305.793	BOTH	3.43811
NC_002754	1675627	1676370	-	SSO1858	88.932	53.3632	BOTH	1.66654
NC_002754	1457989	1458435	-	SSO1610	88.89	132.765	BOTH	1.49358
NC_002754	660962	661462	-	SSO0776	88.7916	169.398	BOTH	1.90782
NC_002754	2211482	2212210	-	SSO2435	88.6291	294.792	BOTH	3.32613
NC_002754	2473023	2474357	+	SSO2720	88.513	117.404	BOTH	1.3264
NC_002754	591723	594278	-	SSO0687	88.5069	206.583	BOTH	2.33409
NC_002754	2062387	2063406	-	SSO2248	88.4103	45.8405	BOTH	1.92865
NC_002754	1506159	1508567	+	SSO1653	88.3141	243.623	BOTH	2.75859
NC_002754	728964	729368	+	SSO0849	88.2974	29.3749	BOTH	3.00588
NC_002754	1180704	1181360	+	SSO1344	88.2185	130.439	BOTH	1.47859
NC_002754	363603	365912	-	SSO0421	88.1727	74.3177	BOTH	1.18643
NC_002754	463667	464719	-	SSO0535	88.0185	175.316	BOTH	1.99181
NC_002754	666652	667260	-	SSO0784	87.7962	62.4666	BOTH	1.40549
NC_002754	1751793	1752224	+	SSO1932	87.7775	82.7769	BOTH	1.06041
NC_002754	79467	80372	-	SSO0098	87.7126	115.661	BOTH	1.31864
NC_002754	920502	921533	+	SSO1062	87.6333	34.3157	BOTH	2.55374
NC_002754	813066	813359	-	SSO6855	87.5531	299.256	BOTH	3.41799
NC_002754	2105534	2106547	-	SSO2297	86.9742	83.0147	BOTH	1.0477
NC_002754	1543262	1545244	-	SSO1692	86.857	81.5501	BOTH	1.06508
NC_002754	1064502	1065716	+	SSO1225	86.6622	123.306	BOTH	1.42284
NC_002754	846234	847502	+	SSO0989	86.5821	269.04	BOTH	3.10734
NC_002754	376608	377348	-	SSO0434	86.4944	214.69	BOTH	2.48213
NC_002754	1548839	1549069	+	SSO8725	86.3779	212.892	BOTH	2.46466
NC_002754	1248817	1249788	+	SSO1401	86.0224	99.8376	BOTH	1.1606
NC_002754	1101531	1102481	+	SSO1276	85.7421	260.524	BOTH	3.03846
NC_002754	1640455	1641642	+	SSO1810	85.5054	75.8049	BOTH	1.12797
NC_002754	762340	763548	+	SSO0897	85.3062	93.8825	BOTH	1.10054
NC_002754	125531	126319	-	SSO0149	85.2831	163.495	BOTH	1.91709
NC_002754	1450055	1450573	+	SSO1603	85.0464	260.545	BOTH	3.06356
NC_002754	865035	866441	-	SSO1009	85.0272	76.4432	BOTH	1.11229
NC_002754	1983860	1984561	+	SSO2157	85.0244	119.713	BOTH	1.40799
NC_002754	71195	72679	-	SSO0090	84.9237	60.9234	BOTH	1.39394
NC_002754	1170115	1172595	-	SSO1334	84.7067	72.6803	BOTH	1.16547
NC_002754	169763	170626	+	SSO0197	84.6783	288.919	BOTH	3.41196
NC_002754	1278289	1279041	+	SSO1425	84.6572	195.47	BOTH	2.30895
NC_002754	406507	407622	-	SSO0472	84.4429	176.142	BOTH	2.08593
NC_002754	214339	215556	-	SSO0248	84.3922	252.649	BOTH	2.99375
NC_002754	252385	253464	-	SSO0295	84.2984	114.639	BOTH	1.35992
NC_002754	2925963	2926160	+	SSO12127	84.1966	166.98	BOTH	1.98322
NC_002754	2438416	2440404	-	SSO2679	84.0328	55.3967	BOTH	1.51693
NC_002754	2653718	2654299	+	SSO2901	84.0032	70.4749	BOTH	1.19196
NC_002754	382601	384325	-	SSO0444	83.9242	186.572	BOTH	2.2231
NC_002754	542822	543523	+	SSO0626	83.917	65.6205	BOTH	1.27882
NC_002754	2306712	2308109	-	SSO2538	83.7828	260.046	BOTH	3.10381
NC_002754	514276	514563	+	SSO6206	83.6785	81.1758	BOTH	1.03083
NC_002754	743933	745159	-	SSO0872	83.4916	73.0008	BOTH	1.14371
NC_002754	720549	721523	+	SSO0840	83.4543	155.645	BOTH	1.86503
NC_002754	829584	829640	+	SSOs03	83.3471	156.537	BOTH	1.87814
NC_002754	2963286	2964722	+	SSO3216	83.2521	99.5878	BOTH	1.19622
NC_002754	855569	856504	+	SSO0998	83.1479	92.9624	BOTH	1.11804
NC_002754	702575	703540	-	SSO0820	83.0694	66.9479	BOTH	1.24081
NC_002754	231686	232867	+	SSO0271	82.9432	285.858	BOTH	3.44643
NC_002754	161092	162078	-	SSO0188	82.7022	426.498	BOTH	5.15704
NC_002754	1282426	1283310	+	SSO1429	82.4738	116.608	BOTH	1.41388
NC_002754	1370921	1371163	-	SSO8278	82.4677	21.6327	BOTH	3.81219
NC_002754	164314	164934	+	SSO0190	82.3441	85.9861	BOTH	1.04423
NC_002754	24484	25713	+	SSO0026	82.3048	131.25	BOTH	1.59468
NC_002754	1653996	1655258	-	SSO1824	82.0692	135.049	BOTH	1.64555
NC_002754	738414	739154	+	SSO0863	82.0648	60.7667	BOTH	1.35049
NC_002754	997810	998610	-	SSO1156	82.0644	74.5214	BOTH	1.10122
NC_002754	2009385	2010569	+	SSO2184	81.9314	193.261	BOTH	2.35881
NC_002754	2520491	2521219	-	SSO2763	81.8753	53.3226	BOTH	1.53547
NC_002754	1404715	1405452	+	SSO1556	81.6961	256.239	BOTH	3.13649
NC_002754	2891046	2892449	+	SSO3142	81.21	195.531	BOTH	2.40773
NC_002754	907366	907821	+	SSO1049	81.074	217.362	BOTH	2.68104
NC_002754	69430	69993	-	SSO0086	81.0175	84.9878	BOTH	1.04901
NC_002754	2131092	2131862	+	SSO2331	81.0002	52.8401	BOTH	1.53293
NC_002754	2726051	2727280	-	SSO2983	80.9705	279.088	BOTH	3.44679
NC_002754	515500	516024	-	SSO0588	80.9484	61.2627	BOTH	1.32133
NC_002754	1187882	1189561	+	SSO1351	80.8764	31.3724	BOTH	2.57794
NC_002754	2162297	2162611	-	SSO2369	80.3451	108.472	BOTH	1.35008
NC_002754	567579	568523	-	SSO0657	80.2537	238.097	BOTH	2.96681
NC_002754	863102	864232	+	SSO1007	80.1153	55.9579	BOTH	1.43171
NC_002754	1364187	1364927	-	SSO1510	80.0831	49.6588	BOTH	1.61267
NC_002754	966101	966616	-	SSO1120	80.0167	59.9184	BOTH	1.33543
NC_002754	536506	537174	+	SSO0616	79.9221	80.2303	BOTH	1.00386
NC_002754	307487	308413	+	SSO0362	79.8553	77.9721	BOTH	1.02415
NC_002754	2675835	2676362	+	SSO2931	79.5069	25.6758	BOTH	3.09656
NC_002754	2018852	2019943	-	SSO2197	79.3379	109.072	BOTH	1.37478
NC_002754	1680379	1681323	+	SSO1864	78.974	70.1191	BOTH	1.12628
NC_002754	572192	572893	-	SSO0662	78.8721	124.245	BOTH	1.57528
NC_002754	2044890	2045375	-	SSO2224	78.7354	78.1337	BOTH	1.0077
NC_002754	754612	755694	-	SSO0886	78.6413	137.058	BOTH	1.74282
NC_002754	2144479	2145309	+	SSO2350	78.582	112.866	BOTH	1.43628
NC_002754	257014	258054	+	SSO0302	78.5781	118.867	BOTH	1.51273
NC_002754	43863	44612	+	SSO0050	78.5463	75.4388	BOTH	1.04119
NC_002754	30861	31190	+	SSO0035	78.5253	90.9658	BOTH	1.15843
NC_002754	984427	985140	-	SSO1143	78.5143	155.288	BOTH	1.97783
NC_002754	2946137	2947924	-	SSO3202	78.5034	314.736	BOTH	4.0092
NC_002754	1751338	1751796	+	SSO1931	78.474	67.0579	BOTH	1.17024
NC_002754	1802590	1805727	+	SSO1991	78.2576	57.9703	BOTH	1.34996
NC_002754	253437	254333	-	SSO0296	78.1927	94.5367	BOTH	1.20902
NC_002754	1044711	1045613	-	SSO1206	78.0557	98.8874	BOTH	1.26688
NC_002754	262804	264048	+	SSO0309	78.0523	78.1121	BOTH	1.00077
NC_002754	2615380	2615796	-	SSO2857	77.6779	129.544	BOTH	1.66771
NC_002754	1866840	1868258	-	SSO2047	77.6122	395.118	BOTH	5.09092
NC_002754	1986061	1986828	-	SSO2161	77.6051	252.624	BOTH	3.25525
NC_002754	2943527	2944714	-	SSO3198	77.5801	71.4382	BOTH	1.08597
NC_002754	1045601	1046758	-	SSO1207	77.3522	103.154	BOTH	1.33356
NC_002754	34256	34702	+	SSO0038	77.2956	94.5445	BOTH	1.22315
NC_002754	1632858	1633280	+	SSO1802	77.1887	122.147	BOTH	1.58245
NC_002754	21513	22064	+	SSO0021	76.989	138.711	BOTH	1.8017
NC_002754	433155	433844	-	SSO0501	76.989	88.4142	BOTH	1.1484
NC_002754	1006952	1008058	-	SSO1168	76.8583	169.139	BOTH	2.20066
NC_002754	2503123	2504163	-	SSO2749	76.7527	136.873	BOTH	1.7833
NC_002754	2639601	2640188	+	SSO2886	76.6824	17.6448	BOTH	4.34589
NC_002754	1096402	1099122	+	SSO1273	76.41	413.15	BOTH	5.40702
NC_002754	1611934	1613340	+	SSO1780	76.3096	280.603	BOTH	3.67716
NC_002754	904866	905645	+	SSO1046	76.1897	341.759	BOTH	4.48563
NC_002754	1027341	1027898	+	SSO1184	76.1611	87.1412	BOTH	1.14417
NC_002754	2169762	2170484	+	SSO2383	76.1033	211.999	BOTH	2.78568
NC_002754	902135	903010	-	SSO1043	76.0243	65.2197	BOTH	1.16567
NC_002754	519526	520656	+	SSO0592	75.9911	164.693	BOTH	2.16727
NC_002754	725084	725314	-	SSO6661	75.9078	14.9713	BOTH	5.07021
NC_002754	500806	502251	+	SSO0569	75.8644	134.604	BOTH	1.77427
NC_002754	365906	369634	+	SSO0420	75.8615	270.698	BOTH	3.56831
NC_002754	1895792	1896118	+	SSO2080	75.8118	45.2656	BOTH	1.67482
NC_002754	543785	544459	+	SSO0628	75.7566	53.797	BOTH	1.40819
NC_002754	826592	828184	+	SSO0968	75.479	156.919	BOTH	2.07897
NC_002754	1399795	1400979	-	SSO1550	75.444	28.1924	BOTH	2.67604
NC_002754	1638947	1639645	-	SSO1808	75.3798	55.0174	BOTH	1.37011
NC_002754	1635712	1637694	-	SSO1806	75.1396	185.179	BOTH	2.46447
NC_002754	1787734	1788111	-	SSO1975	74.9522	66.7888	BOTH	1.12223
NC_002754	1041723	1041878	-	SSO7399	74.7501	25.7162	BOTH	2.90674
NC_002754	562836	563246	+	SSO0650	74.6086	99.2917	BOTH	1.33083
NC_002754	84240	84935	+	SSO0102	74.5878	54.7577	BOTH	1.36214
NC_002754	540769	541404	-	SSO0624	74.562	71.1252	BOTH	1.04832
NC_002754	288531	289544	-	SSO0335	74.5371	121.555	BOTH	1.6308
NC_002754	1416337	1416720	+	SSO1570	74.4559	179.403	BOTH	2.40953
NC_002754	48833	49279	+	SSO0057	74.397	97.6392	BOTH	1.31241
NC_002754	2951576	2952409	+	SSO3205	74.3637	67.4259	BOTH	1.10289
NC_002754	2703907	2704938	-	SSO2960	74.3251	275.196	BOTH	3.70259
NC_002754	1126665	1127120	-	SSO1298	74.2546	34.4321	BOTH	2.15655
NC_002754	338970	341201	+	SSO0391	74.1874	102.481	BOTH	1.38138
NC_002754	2458404	2459261	+	SSO2705	73.995	80.6955	BOTH	1.09055
NC_002754	2766637	2768106	+	SSO3019	73.9794	102.528	BOTH	1.3859
NC_002754	988438	989463	-	SSO1148	73.7495	128.56	BOTH	1.7432
NC_002754	22052	22492	-	SSO0022	73.6464	208.287	BOTH	2.8282
NC_002754	666288	666677	-	SSO0783	73.5319	40.9685	BOTH	1.79484
NC_002754	370903	371634	+	SSO0426	73.5156	85.987	BOTH	1.16964
NC_002754	2638613	2639527	-	SSO2885	73.256	39.2328	BOTH	1.86721
NC_002754	2366253	2369225	-	SSO2602	73.1873	192.287	BOTH	2.62733
NC_002754	1682955	1683302	+	SSO1867	72.9744	110.509	BOTH	1.51435
NC_002754	1639888	1640421	+	SSO1809	72.9521	74.9963	BOTH	1.02802
NC_002754	342491	343210	-	SSO0393	72.9413	31.6057	BOTH	2.30785
NC_002754	142612	143181	+	SSO0171	72.8908	68.5608	BOTH	1.06315
NC_002754	2133042	2134058	-	SSO2334	72.8734	23.3279	BOTH	3.12387
NC_002754	2362611	2363285	-	SSO2598	72.8133	71.3195	BOTH	1.02095
NC_002754	212541	213524	+	SSO0245	72.6838	204.761	BOTH	2.81715
NC_002754	2737693	2738847	+	SSO2996	72.6172	125.819	BOTH	1.73263
NC_002754	2489890	2490564	+	SSO2735	72.5574	213.446	BOTH	2.94175
NC_002754	2304367	2306178	-	SSO2537	72.4106	185.439	BOTH	2.56094
NC_002754	360575	361012	+	SSO0414	72.376	104.541	BOTH	1.44442
NC_002754	2104864	2105547	-	SSO2296	72.3604	112.549	BOTH	1.55539
NC_002754	2443316	2444086	-	SSO2686	72.1496	186.69	BOTH	2.58754
NC_002754	230049	231119	-	SSO0269	72.1025	181.347	BOTH	2.51513
NC_002754	700409	700750	-	SSO0817	71.9815	46.5162	BOTH	1.54745
NC_002754	2329562	2329939	+	SSO2556	71.753	62.9462	BOTH	1.13991
NC_002754	576091	576729	-	SSO0669	71.6436	48.926	BOTH	1.46432
NC_002754	159972	161090	+	SSO0187	71.4798	107.615	BOTH	1.50552
NC_002754	2045924	2046595	+	SSO2226	71.4674	103.443	BOTH	1.44741
NC_002754	2965911	2966117	-	SSO12210	71.3556	14.3681	BOTH	4.96624
NC_002754	162109	163914	-	SSO0189	71.0728	285.096	BOTH	4.01132
NC_002754	537335	537808	+	SSO0617	71.0704	104.043	BOTH	1.46395
NC_002754	66854	67888	+	SSO0083	70.8549	96.9683	BOTH	1.36855
NC_002754	50238	51206	-	SSO0060	70.7781	154.895	BOTH	2.18846
NC_002754	1915474	1918680	-	SSO2098	70.6214	214.253	BOTH	3.03383
NC_002754	2941689	2942630	-	SSO3195	70.5144	45.7446	BOTH	1.54148
NC_002754	1277873	1278292	+	SSO1424	70.1306	214.09	BOTH	3.05274
NC_002754	565312	566070	-	SSO0654	70.1038	66.7071	BOTH	1.05092
NC_002754	465344	466165	+	SSO0537	69.8799	316.808	BOTH	4.5336
NC_002754	462181	462582	-	SSO0532	69.618	148.831	BOTH	2.13782
NC_002754	1245343	1245876	+	SSO1397	69.5552	76.5506	BOTH	1.10057
NC_002754	575760	576098	-	SSO0668	69.3061	48.5601	BOTH	1.42722
NC_002754	639120	640448	+	SSO0755	69.2843	86.2383	BOTH	1.2447
NC_002754	1498101	1499135	+	SSO1646	69.1857	48.5175	BOTH	1.42599
NC_002754	1953502	1954794	+	SSO2127	69.1424	14.9248	BOTH	4.63272
NC_002754	2942640	2943566	-	SSO3197	69.1396	27.8312	BOTH	2.48425
NC_002754	1198519	1199217	+	SSO1363	69.0776	36.4144	BOTH	1.89698
NC_002754	132570	133430	+	SSO0159	69.022	332.904	BOTH	4.82316
NC_002754	1008055	1008945	-	SSO1169	68.9278	183.05	BOTH	2.65567
NC_002754	2755698	2756789	+	SSO3011	68.8966	91.2733	BOTH	1.32479
NC_002754	632028	633251	-	SSO0745	68.7353	85.4988	BOTH	1.24388
NC_002754	2370190	2371680	-	SSO2605	68.7083	83.5021	BOTH	1.21531
NC_002754	228987	229523	-	SSO0266	68.5232	78.9567	BOTH	1.15226
NC_002754	343263	343532	-	SSO5761	68.1425	33.5591	BOTH	2.03052
NC_002754	2744889	2745788	-	SSO3004	68.1425	48.3405	BOTH	1.40964
NC_002754	489798	490109	-	SSO0555	68.1056	82.2473	BOTH	1.20764
NC_002754	1286107	1286691	+	SSO1433	68.0687	79.3358	BOTH	1.16553
NC_002754	559954	560547	-	SSO0646	68.0553	77.668	BOTH	1.14125
NC_002754	2518404	2519600	-	SSO2761	67.9766	165.956	BOTH	2.44137
NC_002754	420471	421244	-	SSO0488	67.8524	33.4221	BOTH	2.03017
NC_002754	179604	180845	-	SSO0210	67.6696	250.496	BOTH	3.70175
NC_002754	1539641	1540336	+	SSO1686	67.6378	170.037	BOTH	2.51393
NC_002754	840744	841259	-	SSO0983	67.6292	105.628	BOTH	1.56187
NC_002754	628750	629181	-	SSO0739	67.5827	40.1876	BOTH	1.68168
NC_002754	841379	842476	-	SSO0985	67.5761	122.965	BOTH	1.81965
NC_002754	135566	136354	+	SSO0163	67.1098	60.8394	BOTH	1.10306
NC_002754	990748	991818	+	SSO1150	67.0215	200.463	BOTH	2.99103
NC_002754	965645	966097	+	SSO1118	66.9285	34.8128	BOTH	1.92253
NC_002754	2890425	2890988	-	SSO3141	66.9275	200.267	BOTH	2.9923
NC_002754	2708082	2708855	+	SSO2964	66.848	183.017	BOTH	2.73781
NC_002754	763562	766090	-	SSO0899	66.8412	83.7177	BOTH	1.25249
NC_002754	2973740	2974393	-	SSO3228	66.8306	64.5141	BOTH	1.03591
NC_002754	2910069	2910863	+	SSO3159	66.8206	25.753	BOTH	2.59468
NC_002754	2194603	2195046	-	SSO2413	66.7288	111.852	BOTH	1.67622
NC_002754	716488	716790	-	SSO0836	66.7077	27.3931	BOTH	2.4352
NC_002754	110094	110804	-	SSO0131	66.0894	60.3149	BOTH	1.09574
NC_002754	1405449	1405745	+	SSO8359	65.7286	109.69	BOTH	1.66883
NC_002754	207852	208922	+	SSO0239	65.3278	88.8652	BOTH	1.3603
NC_002754	1099140	1100186	+	SSO1274	65.1753	169.649	BOTH	2.60296
NC_002754	222803	224134	-	SSO0258	65.1725	138.439	BOTH	2.12419
NC_002754	1	252	+	SSO12256	65.1262	247.302	BOTH	3.79727
NC_002754	82518	84152	+	SSO0101	65.0872	54.1918	BOTH	1.20105
NC_002754	202018	202758	+	SSO0233	65.0457	70.1944	BOTH	1.07915
NC_002754	663613	664182	+	SSO0780	65.0107	42.8354	BOTH	1.51769
NC_002754	389010	389447	-	SSO0449	64.882	198.186	BOTH	3.05456
NC_002754	2632768	2633439	+	SSO2880	64.5263	38.0833	BOTH	1.69435
NC_002754	1129863	1130912	-	SSO1300	64.3309	27.9964	BOTH	2.29783
NC_002754	208923	209972	+	SSO0241	64.3309	80.1685	BOTH	1.24619
NC_002754	1888545	1889006	-	SSO2071	64.316	94.6189	BOTH	1.47116
NC_002754	1375603	1376841	+	SSO1524	64.278	50.3544	BOTH	1.27651
NC_002754	2027648	2029624	+	SSO2204	64.27	414.446	BOTH	6.44851
NC_002754	1621252	1621977	+	SSO1787	64.248	38.2041	BOTH	1.6817
NC_002754	535932	536519	+	SSO0615	64.0489	91.7529	BOTH	1.43254
NC_002754	1047747	1049813	+	SSO1209	64.0207	40.2557	BOTH	1.59035
NC_002754	1993637	1994308	-	SSO2169	64.0122	116.72	BOTH	1.82341
NC_002754	254333	255334	-	SSO0298	63.7058	71.6526	BOTH	1.12474
NC_002754	1998652	1998921	+	SSO9953	63.6637	82.4887	BOTH	1.2957
NC_002754	2166513	2167706	-	SSO2377	63.5897	133.759	BOTH	2.10346
NC_002754	1119607	1120947	-	SSO1291	63.3824	216.942	BOTH	3.42274
NC_002754	2533143	2533412	-	SSO11114	63.3438	47.6488	BOTH	1.32939
NC_002754	2960332	2962644	-	SSO3214	63.2989	227.837	BOTH	3.59939
NC_002754	2490548	2491108	-	SSO2736	63.2822	200.475	BOTH	3.16795
NC_002754	649487	650488	-	SSO0764	63.2748	304.42	BOTH	4.81108
NC_002754	22598	23215	+	SSO0023	63.176	130.613	BOTH	2.06744
NC_002754	940121	940585	-	SSO1082	63.158	107.544	BOTH	1.70278
NC_002754	596120	596539	-	SSO0690	62.9324	61.4274	BOTH	1.0245
NC_002754	1700448	1701320	+	SSO1885	62.9282	105.613	BOTH	1.67831
NC_002754	520622	521494	+	SSO0593	62.8293	146.892	BOTH	2.33795
NC_002754	2350288	2351055	-	SSO2581	62.7589	302.878	BOTH	4.82606
NC_002754	2881292	2882446	-	SSO3130	62.6707	54.1962	BOTH	1.15637
NC_002754	741301	742371	-	SSO0869	62.6663	308.768	BOTH	4.92717
NC_002754	103509	104171	-	SSO0123	62.4057	105.994	BOTH	1.69847
NC_002754	2047756	2048640	+	SSO2228	62.3677	55.0996	BOTH	1.13191
NC_002754	1039799	1040275	+	SSO1197	62.2935	53.652	BOTH	1.16107
NC_002754	268425	270347	-	SSO0315	62.1669	221.638	BOTH	3.56522
NC_002754	1553572	1554099	+	SSO1706	62.1659	23.1869	BOTH	2.68108
NC_002754	2113415	2114233	+	SSO2310	62.1203	123.133	BOTH	1.98218
NC_002754	878898	879254	-	SSO1020	61.9404	60.2552	BOTH	1.02797
NC_002754	2631764	2632567	-	SSO2879	61.8826	49.4669	BOTH	1.25099
NC_002754	1102450	1103427	+	SSO1277	61.7363	128.08	BOTH	2.07463
NC_002754	794235	796136	-	SSO0936	61.7179	129.098	BOTH	2.09175
NC_002754	1280804	1282480	+	SSO1428	61.6543	100.06	BOTH	1.62292
NC_002754	1892833	1893897	-	SSO2077	61.3972	24.4847	BOTH	2.50758
NC_002754	2163267	2164274	+	SSO2371	61.3557	169.419	BOTH	2.76127
NC_002754	2336560	2337624	-	SSO2566	61.3161	26.2382	BOTH	2.3369
NC_002754	1841761	1842330	-	SSO2027	61.0707	81.909	BOTH	1.34122
NC_002754	2277771	2278145	+	SSO2509	61.0404	296.037	BOTH	4.84986
NC_002754	1357488	1358021	+	SSO1503	60.9821	87.8195	BOTH	1.44009
NC_002754	1196929	1198053	-	SSO1361	60.8868	91.4242	BOTH	1.50154
NC_002754	388033	389013	+	SSO0448	60.7551	147.008	BOTH	2.41968
NC_002754	988135	988437	+	SSO1147	60.7211	97.4738	BOTH	1.60527
NC_002754	432474	433139	+	SSO0500	60.698	43.4115	BOTH	1.3982
NC_002754	2502319	2503128	+	SSO2748	60.6778	60.2014	BOTH	1.00791
NC_002754	725782	726456	-	SSO0845	60.6565	28.7942	BOTH	2.10655
NC_002754	2421630	2422811	-	SSO2665	60.6545	105.565	BOTH	1.74044
NC_002754	2289080	2290036	+	SSO2520	60.654	77.7684	BOTH	1.28216
NC_002754	1293799	1294521	-	SSO1441	60.572	134.508	BOTH	2.22064
NC_002754	897163	897495	-	SSO1036	60.4386	85.7844	BOTH	1.41937
NC_002754	447894	448625	-	SSO0519	60.2993	73.3252	BOTH	1.21602
NC_002754	655982	657223	-	SSO0771	60.2976	40.5984	BOTH	1.48522
NC_002754	530647	531255	-	SSO0607	60.2801	225.107	BOTH	3.73435
NC_002754	616781	617791	-	SSO0723	59.9775	183.079	BOTH	3.05245
NC_002754	74314	76041	-	SSO0093	59.8846	71.5692	BOTH	1.19512
NC_002754	2069543	2071048	+	SSO2254	59.65	117.622	BOTH	1.97186
NC_002754	308410	309468	+	SSO0363	59.6244	106.331	BOTH	1.78335
NC_002754	2649690	2649938	+	SSO11412	59.3197	134.168	BOTH	2.26178
NC_002754	2928941	2930848	+	SSO3182	59.3056	88.9246	BOTH	1.49943
NC_002754	959676	960710	+	SSO1112	59.2544	130.048	BOTH	2.19475
NC_002754	2067142	2068644	-	SSO2251	58.9645	56.144	BOTH	1.05024
NC_002754	539774	540166	-	SSO0621	58.904	51.2157	BOTH	1.15012
NC_002754	2525637	2526242	-	SSO2768	58.7255	56.1559	BOTH	1.04576
NC_002754	779470	780996	-	SSO0917	58.7166	123.523	BOTH	2.10372
NC_002754	572859	573935	-	SSO0664	58.5477	92.9299	BOTH	1.58725
NC_002754	258056	259051	+	SSO0304	58.4525	106.39	BOTH	1.82012
NC_002754	1578607	1579065	+	SSO1740	58.338	55.0025	BOTH	1.06064
NC_002754	2016255	2016629	-	SSO2193	58.2763	246.237	BOTH	4.22533
NC_002754	2452659	2453570	-	SSO2700	58.2482	30.2608	BOTH	1.92487
NC_002754	170623	172464	+	SSO0198	58.2417	144.681	BOTH	2.48415
NC_002754	2927727	2928887	-	SSO3181	58.1804	100.087	BOTH	1.72029
NC_002754	381178	381825	-	SSO0440	58.1184	27.5389	BOTH	2.11041
NC_002754	95902	96168	+	SSO5209	57.9088	223.564	BOTH	3.86063
NC_002754	524697	524990	+	SSO6223	57.879	122.337	BOTH	2.11367
NC_002754	2900316	2901368	-	SSO3148	57.8313	27.7853	BOTH	2.08137
NC_002754	2962883	2963272	-	SSO3215	57.8067	428.13	BOTH	7.40622
NC_002754	569181	569582	-	SSO0659	57.8001	94.1161	BOTH	1.6283
NC_002754	940676	941482	+	SSO1083	57.7993	63.1679	BOTH	1.09288
NC_002754	2888776	2890428	-	SSO3140	57.7943	101.345	BOTH	1.75355
NC_002754	1340550	1340996	+	SSO1483	57.7785	80.4634	BOTH	1.39262
NC_002754	2738911	2740170	-	SSO2998	57.7223	32.9918	BOTH	1.74959
NC_002754	76025	76711	-	SSO0094	57.711	293.484	BOTH	5.08541
NC_002754	2516119	2518407	-	SSO2760	57.6607	90.7126	BOTH	1.57321
NC_002754	2178847	2179395	-	SSO2391	57.5852	87.4359	BOTH	1.51837
NC_002754	2949984	2951066	-	SSO3204	57.4257	190.706	BOTH	3.32091
NC_002754	630846	632051	+	SSO0743	57.3704	57.4102	BOTH	1.00069
NC_002754	264045	264707	+	SSO0311	57.3247	82.3125	BOTH	1.4359
NC_002754	514553	515524	+	SSO0586	57.3186	53.0142	BOTH	1.08119
NC_002754	1046762	1047028	-	SSO7412	57.2617	45.5936	BOTH	1.25592
NC_002754	491695	493416	+	SSO0558	56.9833	45.0674	BOTH	1.2644
NC_002754	2673081	2673608	-	SSO2925	56.9309	21.3529	BOTH	2.66619
NC_002754	1542451	1543104	+	SSO1691	56.9249	70.1194	BOTH	1.23179
NC_002754	768342	768863	+	SSO0903	56.9233	78.5754	BOTH	1.38037
NC_002754	484290	484916	-	SSO0551	56.8964	46.6633	BOTH	1.2193
NC_002754	2206363	2206887	-	SSO2428	56.7626	72.3295	BOTH	1.27425
NC_002754	2104400	2104804	-	SSO2295	56.7321	105.545	BOTH	1.8604
NC_002754	2687185	2689239	+	SSO2942	56.7025	25.7822	BOTH	2.19929
NC_002754	2909237	2910094	+	SSO3158	56.6792	33.2133	BOTH	1.70652
NC_002754	830094	831437	+	SSO0971	56.5569	41.6858	BOTH	1.35674
NC_002754	2145846	2146082	-	SSO10258	56.4918	96.6011	BOTH	1.71
NC_002754	613532	616492	-	SSO0722	56.4767	59.5434	BOTH	1.0543
NC_002754	1352555	1355674	-	SSO1500	56.4501	162.411	BOTH	2.87707
NC_002754	438552	439487	+	SSO0505	56.201	128.729	BOTH	2.2905
NC_002754	1406046	1406915	+	SSO1560	55.8974	100.174	BOTH	1.7921
NC_002754	88678	89373	+	SSO0109	55.8478	58.1365	BOTH	1.04098
NC_002754	941457	942194	-	SSO1085	55.7125	46.2054	BOTH	1.20576
NC_002754	2533409	2534632	-	SSO2776	55.6798	91.6018	BOTH	1.64515
NC_002754	2955190	2955987	-	SSO3209	55.5286	48.5387	BOTH	1.14401
NC_002754	2883400	2884029	+	SSO3132	55.5286	63.2389	BOTH	1.13885
NC_002754	2386240	2387187	-	SSO2620	55.4896	73.3993	BOTH	1.32276
NC_002754	839386	840744	-	SSO0981	55.4878	85.5052	BOTH	1.54097
NC_002754	76708	77907	-	SSO0095	55.4258	261.05	BOTH	4.7099
NC_002754	1463138	1464673	+	SSO1615	55.3921	122.439	BOTH	2.21041
NC_002754	646857	647078	-	SSO6468	55.2507	55.4587	BOTH	1.00376
NC_002754	1666519	1667571	+	SSO1840	55.2064	62.8617	BOTH	1.13867
NC_002754	2725126	2726088	+	SSO2982	55.0737	92.0798	BOTH	1.67194
NC_002754	2388719	2389468	-	SSO2623	55.0515	209.347	BOTH	3.80275
NC_002754	899337	900575	-	SSO1039	54.936	53.6481	BOTH	1.02401
NC_002754	2657101	2657556	+	SSO2906	54.7439	155.172	BOTH	2.83451
NC_002754	1770644	1771825	+	SSO1952	54.7352	51.5538	BOTH	1.06171
NC_002754	2123734	2124657	-	SSO2323	54.5003	18.7142	BOTH	2.91225
NC_002754	2135271	2135543	+	SSO10237	54.4212	30.4033	BOTH	1.78998
NC_002754	1291579	1292313	-	SSO1439	54.4122	191.787	BOTH	3.52471
NC_002754	43434	43829	+	SSO0049	54.3133	118.773	BOTH	2.1868
NC_002754	750854	751135	-	SSO6716	54.2159	120.675	BOTH	2.22583
NC_002754	820990	823791	-	SSO0965	54.1942	84.0033	BOTH	1.55004
NC_002754	1355907	1356590	+	SSO1501	54.0493	101.83	BOTH	1.88402
NC_002754	757372	758109	+	SSO0889	53.9569	134.961	BOTH	2.50128
NC_002754	2495767	2497512	+	SSO2742	53.9243	124.43	BOTH	2.3075
NC_002754	768805	769428	+	SSO0904	53.8477	86.5703	BOTH	1.60769
NC_002754	2704945	2706603	-	SSO2962	53.7844	235.937	BOTH	4.38672
NC_002754	2590634	2592271	-	SSO2830	53.7357	72.5457	BOTH	1.35005
NC_002754	1618384	1619436	+	SSO1785	53.7298	137.744	BOTH	2.56364
NC_002754	1759304	1760605	+	SSO1941	53.5383	74.7987	BOTH	1.39711
NC_002754	227596	228060	-	SSO0264	53.4985	26.0308	BOTH	2.0552
NC_002754	229516	229998	-	SSO0267	53.472	95.3739	BOTH	1.78362
NC_002754	2149579	2149869	+	SSO10269	53.4296	87.945	BOTH	1.646
NC_002754	1670734	1671339	+	SSO1845	53.3091	44.9703	BOTH	1.18543
NC_002754	153826	155106	+	SSO0182	53.2697	159.339	BOTH	2.99118
NC_002754	889657	890400	+	SSO1030	52.9413	77.7206	BOTH	1.46805
NC_002754	2500050	2501321	-	SSO2746	52.8996	177.813	BOTH	3.36132
NC_002754	2712932	2713372	-	SSO2969	52.8844	111.045	BOTH	2.09976
NC_002754	799669	800085	+	SSO0941	52.821	38.4817	BOTH	1.37263
NC_002754	2481492	2482814	+	SSO2727	52.8191	157.156	BOTH	2.97537
NC_002754	2146176	2146559	+	SSO2352	52.6365	163.733	BOTH	3.11063
NC_002754	1886722	1888548	+	SSO2070	52.621	93.8514	BOTH	1.78353
NC_002754	914084	915613	+	SSO1054	52.5042	89.3302	BOTH	1.70139
NC_002754	889	2091	+	SSO0002	52.4873	62.9005	BOTH	1.1984
NC_002754	1153789	1155090	-	SSO1324	52.4769	88.9297	BOTH	1.69465
NC_002754	2982208	2984340	+	SSO3239	52.3613	49.2896	BOTH	1.06232
NC_002754	1267917	1268147	-	SSO7998	52.3502	73.9584	BOTH	1.41276
NC_002754	2278488	2280146	+	SSO2510	52.2224	27.642	BOTH	1.88924
NC_002754	1775365	1775841	+	SSO1959	52.1527	117.019	BOTH	2.24378
NC_002754	1043804	1044325	+	SSO1203	51.9591	21.9958	BOTH	2.36223
NC_002754	341941	342501	-	SSO0392	51.8883	31.3165	BOTH	1.6569
NC_002754	2471736	2472941	+	SSO2719	51.8554	138.737	BOTH	2.67545
NC_002754	2303254	2304297	+	SSO2536	51.7936	49.7556	BOTH	1.04096
NC_002754	150044	150952	+	SSO0179	51.7887	51.8947	BOTH	1.00205
NC_002754	249	857	+	SSO0001	51.77	101.877	BOTH	1.96788
NC_002754	2762961	2763821	-	SSO3016	51.5659	156.25	BOTH	3.0301
NC_002754	2037536	2038666	-	SSO2215	51.5518	102.62	BOTH	1.99062
NC_002754	977985	979136	-	SSO1140	51.5118	114.499	BOTH	2.22277
NC_002754	260884	262059	+	SSO0307	51.4154	45.2883	BOTH	1.13529
NC_002754	450009	450920	-	SSO0522	51.3342	59.5357	BOTH	1.15977
NC_002754	511812	512660	-	SSO0583	51.2773	138.498	BOTH	2.70096
NC_002754	410443	412068	-	SSO0477	51.2105	28.4582	BOTH	1.7995
NC_002754	742365	742985	-	SSO0870	51.0478	178.989	BOTH	3.50631
NC_002754	310168	311073	+	SSO0365	51.0068	87.9482	BOTH	1.72424
NC_002754	1047021	1047593	-	SSO1208	50.9524	91.6199	BOTH	1.79815
NC_002754	2882436	2883335	-	SSO3131	50.867	61.4054	BOTH	1.20718
NC_002754	633839	634552	-	SSO0747	50.8105	68.877	BOTH	1.35557
NC_002754	44609	45619	-	SSO0051	50.7502	51.1744	BOTH	1.00836
NC_002754	1856348	1857844	+	SSO2041	50.7189	60.3426	BOTH	1.18975
NC_002754	1189545	1189979	+	SSO1352	50.6353	21.1478	BOTH	2.39435
NC_002754	524987	525586	+	SSO0600	50.531	133.148	BOTH	2.63497
NC_002754	402506	403264	+	SSO0467	50.5293	96.0509	BOTH	1.90089
NC_002754	1806774	1807262	-	SSO1993	50.5196	90.5261	BOTH	1.7919
NC_002754	237076	238356	-	SSO0279	50.5051	282.286	BOTH	5.58925
NC_002754	733203	735080	-	SSO0857	50.5021	80.6218	BOTH	1.59641
NC_002754	423491	424309	+	SSO0491	50.308	14.3571	BOTH	3.50404
NC_002754	181819	182715	-	SSO0212	50.2667	110.653	BOTH	2.20131
NC_002754	2079512	2080072	+	SSO2268	50.1946	265.697	BOTH	5.29334
NC_002754	1883264	1884178	-	SSO2066	50.0331	29.1033	BOTH	1.71915
NC_002754	53306	54031	-	SSO0064	49.9707	75.5508	BOTH	1.5119
NC_002754	1994295	1995482	-	SSO2170	49.9508	56.7081	BOTH	1.13528
NC_002754	2025868	2026740	-	SSO2202	49.8676	194.351	BOTH	3.89733
NC_002754	1377377	1378375	+	SSO1525	49.8034	46.7348	BOTH	1.06566
NC_002754	1451468	1452040	-	SSO1605	49.7464	74.4789	BOTH	1.49717
NC_002754	2692952	2693479	-	SSO2947	49.7327	22.7939	BOTH	2.18185
NC_002754	1228221	1231316	+	SSO1388	49.6617	35.8796	BOTH	1.38412
NC_002754	2529509	2530423	-	SSO2773	49.5611	140.074	BOTH	2.82629
NC_002754	1728731	1730149	-	SSO1909	49.5501	354.271	BOTH	7.14975
NC_002754	1519238	1519717	+	SSO1664	49.4873	94.9613	BOTH	1.9189
NC_002754	1717572	1718372	-	SSO1901	49.3896	19.5154	BOTH	2.53079
NC_002754	2988756	2989226	+	SSO3248	49.3326	80.7689	BOTH	1.63723
NC_002754	922767	923243	+	SSO1064	49.2553	57.7122	BOTH	1.17169
NC_002754	2301034	2302002	-	SSO2534	49.206	84.1575	BOTH	1.71031
NC_002754	2984729	2985496	+	SSO3241	49.1499	65.2049	BOTH	1.32665
NC_002754	2583325	2583681	-	SSO2822	49.1168	17.0497	BOTH	2.8808
NC_002754	2299078	2299446	-	SSO2529	48.924	51.9225	BOTH	1.06129
NC_002754	2630800	2631732	-	SSO2878	48.7901	69.9089	BOTH	1.43285
NC_002754	1620614	1621045	+	SSO1786	48.7875	76.6928	BOTH	1.57198
NC_002754	2354060	2355367	+	SSO2586	48.7361	273.868	BOTH	5.6194
NC_002754	2712484	2712930	-	SSO2968	48.6962	86.1887	BOTH	1.76992
NC_002754	1970712	1971041	-	SSO2142	48.6857	85.9355	BOTH	1.76511
NC_002754	2035195	2035965	+	SSO2212	48.6226	224.458	BOTH	4.61634
NC_002754	2719813	2720220	+	SSO2976	48.4817	77.1354	BOTH	1.59102
NC_002754	361738	362277	+	SSO0416	48.4676	81.2079	BOTH	1.67551
NC_002754	375949	376620	-	SSO0433	48.459	117.852	BOTH	2.432
NC_002754	2617972	2618415	-	SSO2861	48.4416	59.6648	BOTH	1.23168
NC_002754	2376749	2377405	-	SSO2610	48.3821	74.7473	BOTH	1.54494
NC_002754	1805724	1806668	+	SSO1992	48.3533	35.4255	BOTH	1.36493
NC_002754	2707149	2707325	-	SSO11571	48.313	128.175	BOTH	2.65301
NC_002754	1484423	1484911	-	SSO1634	48.2232	94.628	BOTH	1.96229
NC_002754	2905141	2905404	+	SSO12083	48.0968	18.0779	BOTH	2.66053
NC_002754	1665410	1666546	+	SSO1839	48.089	66.3084	BOTH	1.37887
NC_002754	2038638	2040353	-	SSO2216	47.8702	118.464	BOTH	2.47468
NC_002754	540202	540831	+	SSO0622	47.8506	34.3642	BOTH	1.39245
NC_002754	1037675	1038160	-	SSO1195	47.81	124.815	BOTH	2.61064
NC_002754	1001045	1001473	-	SSO1161	47.7192	74.8106	BOTH	1.56772
NC_002754	2595288	2595671	+	SSO2833	47.6878	54.2173	BOTH	1.13692
NC_002754	1041182	1042165	-	SSO1200	47.6658	19.471	BOTH	2.44805
NC_002754	202755	203297	+	SSO0234	47.5635	29.4249	BOTH	1.61644
NC_002754	2453677	2454852	+	SSO2701	47.5225	16.0568	BOTH	2.95966
NC_002754	510845	511822	+	SSO0582	47.5167	60.61	BOTH	1.27555
NC_002754	124663	125556	+	SSO0147	47.4402	39.8449	BOTH	1.19062
NC_002754	1704103	1705134	-	SSO1889	47.2902	73.9262	BOTH	1.56325
NC_002754	1857849	1859327	-	SSO2042	47.1895	100.735	BOTH	2.13469
NC_002754	313601	314965	-	SSO0369	47.144	55.3847	BOTH	1.1748
NC_002754	785043	786044	+	SSO0923	47.0682	87.7365	BOTH	1.86403
NC_002754	2750583	2751812	+	SSO3008	47.0514	40.1509	BOTH	1.17186
NC_002754	2756764	2759355	-	SSO3012	46.988	105.433	BOTH	2.24382
NC_002754	129588	130016	-	SSO0154	46.9138	130.596	BOTH	2.78374
NC_002754	2217271	2218257	+	SSO2441	46.9083	63.5613	BOTH	1.35501
NC_002754	1937245	1938825	-	SSO2113	46.8222	42.3493	BOTH	1.10562
NC_002754	544450	546579	+	SSO0629	46.7981	43.0917	BOTH	1.08601
NC_002754	467074	467478	-	SSO0539	46.708	104.691	BOTH	2.24139
NC_002754	2984344	2984802	+	SSO3240	46.6704	47.1666	BOTH	1.01063
NC_002754	1626062	1626556	-	SSO1794	46.5917	26.4094	BOTH	1.76421
NC_002754	1453219	1453848	-	SSO1607	46.4795	29.8628	BOTH	1.55643
NC_002754	1183991	1184653	+	SSO1346	46.3809	41.2084	BOTH	1.12552
NC_002754	761575	762321	+	SSO0895	46.3688	50.0933	BOTH	1.08032
NC_002754	131917	132345	+	SSO0157	46.3098	89.1601	BOTH	1.9253
NC_002754	2287042	2288103	+	SSO2518	46.2797	38.8823	BOTH	1.19025
NC_002754	2680676	2681011	-	SSO2937	46.2739	41.1712	BOTH	1.12394
NC_002754	2953037	2955046	-	SSO3207	46.1971	79.319	BOTH	1.71697
NC_002754	809187	809867	+	SSO0954	46.1697	56.9795	BOTH	1.23413
NC_002754	2420871	2421629	+	SSO2664	46.091	62.9707	BOTH	1.36623
NC_002754	1380370	1381005	+	SSO1529	46.041	30.1249	BOTH	1.52834
NC_002754	758096	759133	+	SSO0890	45.935	159.259	BOTH	3.46704
NC_002754	111846	112274	+	SSO0133	45.9071	41.1136	BOTH	1.11659
NC_002754	1027899	1028879	-	SSO1185	45.8745	128.535	BOTH	2.80188
NC_002754	2442422	2442811	-	SSO2683	45.8467	37.4214	BOTH	1.22515
NC_002754	375411	375989	-	SSO0432	45.7997	76.4547	BOTH	1.66933
NC_002754	923215	924312	+	SSO1065	45.785	103.499	BOTH	2.26055
NC_002754	2721225	2722325	-	SSO2978	45.5033	45.295	BOTH	1.0046
NC_002754	951999	952727	+	SSO1096	45.4994	44.4988	BOTH	1.02249
NC_002754	2934771	2934827	-	SSOs06	45.462	91.01	BOTH	2.00189
NC_002754	847516	849384	+	SSO0990	45.4304	124.42	BOTH	2.7387
NC_002754	228032	229009	-	SSO0265	45.397	41.7976	BOTH	1.08611
NC_002754	1866419	1866721	-	SSO2046	45.327	214.351	BOTH	4.72899
NC_002754	1634300	1634713	+	SSO1804	45.2754	69.1676	BOTH	1.52771
NC_002754	351659	352126	-	SSO0401	45.2192	33.1058	BOTH	1.3659
NC_002754	780980	782347	-	SSO0918	45.2095	147.284	BOTH	3.25782
NC_002754	1603299	1603598	-	SSO1769	45.2044	68.4759	BOTH	1.51481
NC_002754	1152137	1152748	+	SSO1321	45.0238	29.3849	BOTH	1.53221
NC_002754	2723326	2723736	-	SSO2980	44.9753	46.4483	BOTH	1.03275
NC_002754	2901511	2902590	+	SSO3149	44.9485	79.6068	BOTH	1.77107
NC_002754	966613	966981	-	SSO1121	44.9446	73.8537	BOTH	1.64322
NC_002754	11143	11760	+	SSO0012	44.8662	60.2138	BOTH	1.34208
NC_002754	2041721	2042788	+	SSO2220	44.8065	70.4629	BOTH	1.5726
NC_002754	1878836	1879951	+	SSO2060	44.6595	54.2928	BOTH	1.21571
NC_002754	2754394	2755527	+	SSO3010	44.6362	134.736	BOTH	3.01855
NC_002754	1058964	1059650	-	SSO1219	44.6348	37.0505	BOTH	1.2047
NC_002754	1103805	1104530	-	SSO1278	44.6167	30.0107	BOTH	1.48669
NC_002754	440776	441159	+	SSO0507	44.5386	18.5528	BOTH	2.40064
NC_002754	570941	572200	+	SSO0661	44.4229	69.3872	BOTH	1.56197
NC_002754	903948	904832	-	SSO1045	44.2138	76.5923	BOTH	1.73232
NC_002754	2184930	2185730	+	SSO2399	44.2134	77.0256	BOTH	1.74213
NC_002754	130070	131128	+	SSO0155	44.2085	42.0622	BOTH	1.05103
NC_002754	2040411	2040887	-	SSO2218	44.1849	25.811	BOTH	1.71187
NC_002754	1472103	1473362	+	SSO1622	44.0801	56.5417	BOTH	1.2827
NC_002754	1070594	1070887	-	SSO7469	44.0703	46.8175	BOTH	1.06234
NC_002754	45603	46343	-	SSO0053	44.0632	97.0773	BOTH	2.20314
NC_002754	2344187	2344786	-	SSO2572	44.0527	28.7045	BOTH	1.53469
NC_002754	2375511	2376764	-	SSO2609	43.9466	22.6146	BOTH	1.94329
NC_002754	1549199	1549657	+	SSO1697	43.8476	90.1137	BOTH	2.05516
NC_002754	2412368	2413027	-	SSO2653	43.8433	222.489	BOTH	5.07464
NC_002754	512873	513745	-	SSO0584	43.8321	61.0069	BOTH	1.39183
NC_002754	998656	999297	-	SSO1157	43.7271	35.9844	BOTH	1.21517
NC_002754	317426	318394	+	SSO0373	43.5009	91.7952	BOTH	2.11019
NC_002754	777138	778397	-	SSO0913	43.4631	137.292	BOTH	3.15882
NC_002754	1742293	1742688	+	SSO1922	43.4071	21.3092	BOTH	2.03701
NC_002754	1906943	1908628	+	SSO2093	43.3426	22.1533	BOTH	1.95648
NC_002754	778428	778736	+	SSO0914	43.3287	38.0534	BOTH	1.13863
NC_002754	1344571	1345083	+	SSO1489	43.2731	38.9658	BOTH	1.11054
NC_002754	759718	760983	+	SSO0893	43.2572	152.486	BOTH	3.52509
NC_002754	1914354	1914725	+	SSO2096	43.1889	82.9267	BOTH	1.92009
NC_002754	1271424	1273034	-	SSO1419	43.1621	101.755	BOTH	2.3575
NC_002754	1014320	1015573	-	SSO1173	43.12	120.133	BOTH	2.78602
NC_002754	759126	759740	+	SSO0892	43.1187	101.783	BOTH	2.36053
NC_002754	462588	463667	-	SSO0534	43.1089	121.235	BOTH	2.8123
NC_002754	2729405	2729707	-	SSO2986	43.0464	51.5903	BOTH	1.19848
NC_002754	2127575	2128387	+	SSO2327	43.0296	28.2456	BOTH	1.52341
NC_002754	1641643	1642833	-	SSO1811	42.9351	62.1986	BOTH	1.44866
NC_002754	2001586	2002656	+	SSO2178	42.9066	107.465	BOTH	2.50462
NC_002754	1296030	1296641	-	SSO1444	42.9066	56.0574	BOTH	1.3065
NC_002754	381851	382255	-	SSO0441	42.869	52.2599	BOTH	1.21906
NC_002754	1381020	1381553	+	SSO1530	42.8654	27.4598	BOTH	1.56103
NC_002754	2918803	2919381	+	SSO3171	42.816	41.0944	BOTH	1.04189
NC_002754	2621174	2621488	-	SSO2865	42.7776	96.3954	BOTH	2.25341
NC_002754	1322991	1324553	+	SSO1464	42.7192	15.6213	BOTH	2.73467
NC_002754	1945703	1946350	+	SSO2121	42.6557	27.2187	BOTH	1.56715
NC_002754	1393123	1393971	+	SSO1540	42.6294	47.8226	BOTH	1.12182
NC_002754	579806	580975	+	SSO0676	42.5983	15.607	BOTH	2.72943
NC_002754	2966938	2967834	-	SSO3218	42.563	35.8561	BOTH	1.18705
NC_002754	2025294	2025884	-	SSO2201	42.3851	115.162	BOTH	2.71705
NC_002754	1660613	1660981	-	SSO1832	42.1355	23.2433	BOTH	1.8128
NC_002754	2185709	2186512	-	SSO2400	42.1146	120.441	BOTH	2.85984
NC_002754	1931907	1933070	-	SSO2110	42.0758	56.2729	BOTH	1.33742
NC_002754	523517	524713	+	SSO0599	42.0704	53.3347	BOTH	1.26775
NC_002754	837100	837783	-	SSO0978	42.0524	134.29	BOTH	3.1934
NC_002754	220557	221096	-	SSO0256	41.9093	94.1448	BOTH	2.2464
NC_002754	349404	350543	-	SSO0398	41.9008	51.8757	BOTH	1.23806
NC_002754	1032029	1033321	+	SSO1188	41.8862	28.7262	BOTH	1.45812
NC_002754	1625572	1626099	-	SSO1793	41.7166	15.7199	BOTH	2.65374
NC_002754	2392154	2393173	+	SSO2627	41.6646	223.099	BOTH	5.35465
NC_002754	729570	730520	+	SSO0850	41.5994	26.256	BOTH	1.58438
NC_002754	541376	542374	-	SSO0625	41.5893	28.5256	BOTH	1.45797
NC_002754	1720018	1721391	+	SSO1903	41.4915	117.847	BOTH	2.84026
NC_002754	1050458	1050913	-	SSO1210	41.4841	67.8024	BOTH	1.63442
NC_002754	1838292	1839959	+	SSO2025	41.48	30.7273	BOTH	1.34994
NC_002754	114650	115024	-	SSO0138	41.4614	28.7737	BOTH	1.44095
NC_002754	134541	135581	+	SSO0162	41.4049	23.8532	BOTH	1.73583
NC_002754	582563	583798	+	SSO0679	41.3719	56.4085	BOTH	1.36345
NC_002754	1040570	1041202	+	SSO1198	41.3467	32.016	BOTH	1.29144
NC_002754	2391484	2391870	+	SSO2626	41.2917	240.746	BOTH	5.83037
NC_002754	2469166	2470119	-	SSO2717	41.2875	20.4458	BOTH	2.01937
NC_002754	2456188	2456583	+	SSO2703	41.2258	45.4131	BOTH	1.10157
NC_002754	2507711	2508253	-	SSO2753	41.2005	37.1951	BOTH	1.10769
NC_002754	853239	854066	-	SSO0996	41.1025	185.115	BOTH	4.50374
NC_002754	1072414	1072989	+	SSO1240	41.0895	66.1655	BOTH	1.61028
NC_002754	921818	922732	-	SSO1063	40.9705	47.3968	BOTH	1.15685
NC_002754	1283307	1283927	+	SSO1430	40.8939	36.7557	BOTH	1.11259
NC_002754	2300018	2300590	-	SSO2531	40.7016	31.0228	BOTH	1.31199
NC_002754	1516989	1519040	-	SSO1663	40.537	13.3818	BOTH	3.02925
NC_002754	1603595	1604332	-	SSO1772	40.4969	70.6671	BOTH	1.745
NC_002754	935746	936423	+	SSO1078	40.2587	81.8177	BOTH	2.0323
NC_002754	30202	30864	+	SSO0034	40.2576	118.931	BOTH	2.95424
NC_002754	64034	66328	-	SSO0081	40.2344	42.5855	BOTH	1.05844
NC_002754	343869	346610	-	SSO0394	40.2278	65.0811	BOTH	1.61782
NC_002754	1482200	1483252	-	SSO1631	40.1128	23.7784	BOTH	1.68694
NC_002754	2962648	2962899	-	SSO12199	40.104	141.354	BOTH	3.52469
NC_002754	2713350	2714999	-	SSO2970	40.1003	101.278	BOTH	2.52562
NC_002754	2944751	2945137	+	SSO3199	39.9525	81.4998	BOTH	2.03991
NC_002754	1386468	1387892	-	SSO1535	39.946	34.1227	BOTH	1.17066
NC_002754	1284840	1285598	+	SSO1432	39.9455	26.2454	BOTH	1.522
NC_002754	1753659	1754552	+	SSO1934	39.9039	181.043	BOTH	4.53697
NC_002754	2388350	2388715	-	SSO2622	39.8849	60.0964	BOTH	1.50675
NC_002754	2063403	2065997	-	SSO2249	39.8769	32.8379	BOTH	1.21436
NC_002754	2879784	2881247	+	SSO3129	39.8259	121.61	BOTH	3.05355
NC_002754	522187	522768	+	SSO0596	39.7754	87.232	BOTH	2.19311
NC_002754	2734443	2734649	+	SSO11637	39.642	60.1457	BOTH	1.51722
NC_002754	221077	222270	-	SSO0257	39.4271	108.038	BOTH	2.7402
NC_002754	2724868	2725080	+	SSO11614	39.3364	37.6687	BOTH	1.04427
NC_002754	2194143	2194559	+	SSO2412	39.1497	72.485	BOTH	1.85148
NC_002754	474274	475011	-	SSO0544	39.0924	59.889	BOTH	1.53199
NC_002754	490710	491633	-	SSO0557	39.0757	37.9523	BOTH	1.0296
NC_002754	408999	410456	+	SSO0475	39.0418	45.2104	BOTH	1.158
NC_002754	2911880	2913283	-	SSO3163	39.0054	40.7911	BOTH	1.04578
NC_002754	332169	333398	-	SSO0388	38.9754	94.4728	BOTH	2.42391
NC_002754	584670	585737	+	SSO0681	38.9024	42.1611	BOTH	1.08377
NC_002754	1730365	1730715	+	SSO1910	38.8823	52.4176	BOTH	1.34811
NC_002754	450970	451329	-	SSO0523	38.87	93.3762	BOTH	2.40227
NC_002754	2638135	2638554	-	SSO2884	38.87	50.8876	BOTH	1.30917
NC_002754	262008	262835	+	SSO0308	38.8074	61.5658	BOTH	1.58644
NC_002754	1266099	1266701	+	SSO1412	38.6767	231.476	BOTH	5.98491
NC_002754	1992750	1993250	+	SSO2167	38.62	83.1115	BOTH	2.15203
NC_002754	1194841	1195527	+	SSO1357	38.5997	43.8967	BOTH	1.13723
NC_002754	1452325	1453128	+	SSO1606	38.5692	37.9389	BOTH	1.01661
NC_002754	521496	522194	+	SSO0594	38.5549	143.184	BOTH	3.71376
NC_002754	679721	680596	-	SSO0795	38.4559	41.2953	BOTH	1.07383
NC_002754	351214	351678	-	SSO0400	38.4521	19.3372	BOTH	1.98851
NC_002754	1998933	1999832	+	SSO2175	38.2942	134.954	BOTH	3.52413
NC_002754	2193650	2194153	+	SSO2411	38.2188	56.679	BOTH	1.48301
NC_002754	1040300	1040428	+	SSO7389	38.167	14.4769	BOTH	2.6364
NC_002754	2528877	2529503	+	SSO2772	38.1606	67.9541	BOTH	1.78074
NC_002754	2051220	2052134	+	SSO2233	38.1384	240.537	BOTH	6.30694
NC_002754	2714884	2715642	-	SSO2971	38.1246	109.629	BOTH	2.87555
NC_002754	2423246	2423854	+	SSO2667	38.0119	55.5385	BOTH	1.46108
NC_002754	1908797	1910953	+	SSO2094	38.0031	94.7246	BOTH	2.49255
NC_002754	1437080	1437778	+	SSO1591	37.9371	69.1676	BOTH	1.82322
NC_002754	1177035	1178246	+	SSO1341	37.915	23.6265	BOTH	1.60476
NC_002754	218719	219279	+	SSO0253	37.8769	41.18	BOTH	1.08721
NC_002754	182678	183577	-	SSO0213	37.8143	81.0798	BOTH	2.14416
NC_002754	2748748	2750541	+	SSO3007	37.7963	57.6782	BOTH	1.52603
NC_002754	868399	870048	-	SSO1012	37.7445	201.718	BOTH	5.3443
NC_002754	2045582	2045902	-	SSO2225	37.6726	46.1117	BOTH	1.22401
NC_002754	2876706	2878655	-	SSO3127	37.519	36.7475	BOTH	1.02099
NC_002754	2181923	2184178	-	SSO2398	37.4457	70.7312	BOTH	1.8889
NC_002754	28655	29461	-	SSO0032	37.3555	32.0554	BOTH	1.16534
NC_002754	2922727	2923095	+	SSO3176	37.2197	35.6147	BOTH	1.04507
NC_002754	2730188	2730796	-	SSO2987	37.1609	66.3282	BOTH	1.78489
NC_002754	1541630	1542004	+	SSO1689	37.0849	45.005	BOTH	1.21357
NC_002754	963442	964488	+	SSO1117	37.0427	41.2891	BOTH	1.11464
NC_002754	1072986	1073279	+	SSO7475	37.0191	84.4597	BOTH	2.28152
NC_002754	879264	881129	-	SSO1021	36.986	24.0937	BOTH	1.53509
NC_002754	1662548	1662928	+	SSO1835	36.9543	42.844	BOTH	1.15938
NC_002754	2128401	2128889	+	SSO2328	36.9181	13.5789	BOTH	2.71879
NC_002754	578557	579279	-	SSO0674	36.7972	14.1588	BOTH	2.5989
NC_002754	2065994	2067139	-	SSO2250	36.7822	55.7686	BOTH	1.51619
NC_002754	689456	689974	-	SSO0804	36.7813	28.52	BOTH	1.28967
NC_002754	2627766	2629379	-	SSO2875	36.6597	16.4562	BOTH	2.22771
NC_002754	843169	844869	-	SSO0987	36.6128	98.7702	BOTH	2.69769
NC_002754	1696452	1696973	+	SSO1882	36.5699	33.6563	BOTH	1.08657
NC_002754	1370641	1370931	-	SSO8276	36.5102	24.0066	BOTH	1.52084
NC_002754	2359681	2360061	-	SSO2594	36.5009	47.9271	BOTH	1.31304
NC_002754	1378387	1379361	+	SSO1526	36.5002	26.6739	BOTH	1.36839
NC_002754	183541	184449	-	SSO0214	36.4897	99.1478	BOTH	2.71715
NC_002754	1560502	1561029	-	SSO1717	36.4816	14.2789	BOTH	2.55493
NC_002754	667951	668595	+	SSO0785	36.426	154.099	BOTH	4.23046
NC_002754	2641293	2641598	+	SSO2887	36.4142	18.9872	BOTH	1.91783
NC_002754	2524288	2525646	+	SSO2766	36.3562	25.3971	BOTH	1.43151
NC_002754	133415	134593	+	SSO0160	36.3388	99.8501	BOTH	2.74776
NC_002754	749413	750879	+	SSO0879	36.1527	159.364	BOTH	4.40807
NC_002754	1807379	1808365	-	SSO1994	36.1439	100.212	BOTH	2.77259
NC_002754	760984	761571	+	SSO0894	35.9908	137.159	BOTH	3.81094
NC_002754	2427250	2428122	-	SSO2671	35.9166	128.035	BOTH	3.5648
NC_002754	156923	158560	+	SSO0185	35.9117	124.654	BOTH	3.47112
NC_002754	1192000	1192998	-	SSO1354	35.8827	23.0559	BOTH	1.55634
NC_002754	32275	34002	+	SSO0037	35.8408	138.415	BOTH	3.86194
NC_002754	522765	523520	+	SSO0597	35.7623	45.1968	BOTH	1.26381
NC_002754	1267334	1267870	+	SSO1414	35.7093	52.2943	BOTH	1.46445
NC_002754	2691718	2692443	+	SSO2946	35.6933	35.346	BOTH	1.00983
NC_002754	1393968	1394735	+	SSO1542	35.6534	25.2173	BOTH	1.41384
NC_002754	2461882	2462790	-	SSO2710	35.6344	15.4467	BOTH	2.30693
NC_002754	2090649	2091539	-	SSO2281	35.5788	27.5584	BOTH	1.29103
NC_002754	1070884	1071342	-	SSO1237	35.5674	33.9057	BOTH	1.04901
NC_002754	2440385	2441932	-	SSO2680	35.4886	37.9349	BOTH	1.06893
NC_002754	2071570	2073105	+	SSO2256	35.4847	140.181	BOTH	3.95048
NC_002754	2009008	2009310	+	SSO2183	35.3494	126.008	BOTH	3.56466
NC_002754	1985781	1986086	-	SSO2160	35.2851	79.5653	BOTH	2.25493
NC_002754	427181	429337	+	SSO0496	35.2399	107.487	BOTH	3.05015
NC_002754	549129	550580	+	SSO0635	35.1579	77.8373	BOTH	2.21393
NC_002754	938924	940120	+	SSO1080	35.1429	49.6365	BOTH	1.41242
NC_002754	2532076	2533125	-	SSO2775	35.127	25.2956	BOTH	1.38866
NC_002754	249483	249755	-	SSO5576	35.1207	33.1903	BOTH	1.05816
NC_002754	1541979	1542281	+	SSO1690	35.0643	9.35931	BOTH	3.74646
NC_002754	2974651	2975121	-	SSO3230	35.028	71.8109	BOTH	2.0501
NC_002754	1852563	1853435	-	SSO2038	35.0261	182.545	BOTH	5.2117
NC_002754	2486527	2487444	-	SSO2732	35.0028	56.2081	BOTH	1.60582
NC_002754	903007	903951	-	SSO1044	34.8254	35.5719	BOTH	1.02144
NC_002754	2449611	2450486	+	SSO2694	34.7089	78.0109	BOTH	2.24758
NC_002754	2583645	2586584	-	SSO2824	34.6393	15.6921	BOTH	2.20743
NC_002754	1600302	1600553	-	SSO8875	34.6197	12.9003	BOTH	2.68363
NC_002754	475014	475874	-	SSO0545	34.6113	56.7961	BOTH	1.64097
NC_002754	2707414	2707995	-	SSO2963	34.5808	73.6837	BOTH	2.13077
NC_002754	2195006	2196502	-	SSO2415	34.4473	45.8807	BOTH	1.33191
NC_002754	1897233	1898183	-	SSO2085	34.424	135.135	BOTH	3.92561
NC_002754	1018989	1020059	+	SSO1177	34.2769	115.796	BOTH	3.37825
NC_002754	137128	138063	+	SSO0166	34.2374	38.722	BOTH	1.13099
NC_002754	467825	468256	-	SSO0540	34.1912	31.5417	BOTH	1.084
NC_002754	2082845	2083261	-	SSO2273	34.1783	95.375	BOTH	2.79051
NC_002754	1830357	1831514	-	SSO2015	34.1633	35.1214	BOTH	1.02804
NC_002754	550574	551545	+	SSO0636	34.1246	36.5051	BOTH	1.06976
NC_002754	320846	321364	+	SSO0377	34.1184	78.23	BOTH	2.2929
NC_002754	1695924	1696445	+	SSO1881	34.0878	34.1863	BOTH	1.00289
NC_002754	1779283	1779681	+	SSO1964	33.9883	111.639	BOTH	3.28463
NC_002754	2177035	2178315	-	SSO2389	33.9847	22.7319	BOTH	1.49502
NC_002754	1189954	1191945	-	SSO1353	33.866	61.355	BOTH	1.8117
NC_002754	525694	525951	+	SSO6227	33.8146	43.1627	BOTH	1.27645
NC_002754	433904	434368	+	SSO0502	33.8081	121.08	BOTH	3.5814
NC_002754	430925	432187	-	SSO0499	33.7852	63.034	BOTH	1.86573
NC_002754	1841137	1841667	+	SSO2026	33.6727	65.1295	BOTH	1.93419
NC_002754	2722378	2723340	+	SSO2979	33.5465	51.7859	BOTH	1.5437
NC_002754	460955	462184	-	SSO0531	33.4978	61.2386	BOTH	1.82814
NC_002754	2761902	2762969	+	SSO3015	33.4836	29.4675	BOTH	1.13629
NC_002754	2615996	2616553	-	SSO2858	33.4366	12.3956	BOTH	2.69745
NC_002754	1210170	1212011	+	SSO1375	33.4351	40.6669	BOTH	1.2163
NC_002754	2508253	2510007	-	SSO2754	33.4191	67.4729	BOTH	2.01899
NC_002754	316920	317429	+	SSO0372	33.3656	77.4406	BOTH	2.32097
NC_002754	2497535	2498728	+	SSO2743	33.2779	54.9749	BOTH	1.65199
NC_002754	1706392	1706970	+	SSO1891	33.2682	23.0559	BOTH	1.44294
NC_002754	1477947	1479011	-	SSO1626	33.1723	12.8593	BOTH	2.57963
NC_002754	53977	54699	-	SSO0065	33.0936	37.98	BOTH	1.14765
NC_002754	1990873	1991295	-	SSO2165	33.0809	102.198	BOTH	3.08934
NC_002754	2955990	2957621	-	SSO3210	32.9739	69.549	BOTH	2.10921
NC_002754	2677189	2678730	-	SSO2934	32.9379	24.8501	BOTH	1.32546
NC_002754	555969	559124	+	SSO0641	32.9254	77.3204	BOTH	2.34835
NC_002754	1577010	1577282	-	SSO8813	32.9059	40.2844	BOTH	1.22423
NC_002754	350522	351217	-	SSO0399	32.8881	23.5528	BOTH	1.39636
NC_002754	2391867	2392121	+	SSO10784	32.8575	142.404	BOTH	4.33399
NC_002754	2769914	2772109	-	SSO3022	32.844	66.1439	BOTH	2.01388
NC_002754	2215993	2217270	+	SSO2440	32.7803	59.9669	BOTH	1.82936
NC_002754	956119	956466	-	SSO1104	32.764	21.8633	BOTH	1.49858
NC_002754	2991448	2992245	+	SSO12256	32.6894	62.4935	BOTH	1.91174
NC_002754	1731989	1732768	-	SSO1913	32.6685	121.664	BOTH	3.72419
NC_002754	1249713	1251431	+	SSO1402	32.3603	24.947	BOTH	1.29716
NC_002754	2088	2969	+	SSO0004	32.3182	38.4264	BOTH	1.189
NC_002754	1290519	1291598	-	SSO1438	32.3117	85.3067	BOTH	2.64012
NC_002754	145235	146368	-	SSO0174	32.2965	106.313	BOTH	3.29179
NC_002754	722533	723915	+	SSO0842	32.2902	22.4057	BOTH	1.44116
NC_002754	1331704	1332129	-	SSO1470	32.2396	29.5505	BOTH	1.091
NC_002754	2574657	2574959	-	SSO2814	32.2135	44.7421	BOTH	1.38892
NC_002754	534957	535868	-	SSO0614	32.1076	31.1709	BOTH	1.03005
NC_002754	260097	260906	+	SSO0306	31.9918	28.094	BOTH	1.13874
NC_002754	2081153	2082034	-	SSO2272	31.9265	194.563	BOTH	6.0941
NC_002754	595591	596142	+	SSO0689	31.9223	95.1054	BOTH	2.97928
NC_002754	661453	661980	-	SSO0777	31.9009	77.0275	BOTH	2.41459
NC_002754	401626	402570	-	SSO0468	31.9004	45.3798	BOTH	1.42255
NC_002754	1443075	1444715	-	SSO1598	31.8982	41.7282	BOTH	1.30817
NC_002754	2968706	2969605	+	SSO3220	31.8638	46.1117	BOTH	1.44715
NC_002754	443316	443687	-	SSO0510	31.8112	38.6743	BOTH	1.21575
NC_002754	1369373	1370437	+	SSO1516	31.7124	20.9776	BOTH	1.51173
NC_002754	2736391	2737575	-	SSO2995	31.5625	74.3624	BOTH	2.35603
NC_002754	2180744	2181439	-	SSO2394	31.523	70.4595	BOTH	2.23518
NC_002754	546572	547924	+	SSO0632	31.474	42.7888	BOTH	1.3595
NC_002754	1379369	1380388	+	SSO1527	31.4178	25.5649	BOTH	1.22894
NC_002754	2179413	2180783	-	SSO2393	31.3758	36.7279	BOTH	1.17058
NC_002754	1659285	1659863	-	SSO1830	31.3288	59.8497	BOTH	1.91037
NC_002754	2484459	2485367	+	SSO2729	31.2633	34.5457	BOTH	1.10499
NC_002754	2222038	2223468	+	SSO2450	31.2071	94.0118	BOTH	3.01251
NC_002754	312608	313216	-	SSO0367	31.2038	19.9893	BOTH	1.56103
NC_002754	1739504	1739719	+	SSO9241	31.192	31.3816	BOTH	1.00608
NC_002754	98567	100018	-	SSO0120	31.1722	163.63	BOTH	5.24923
NC_002754	225253	226020	-	SSO0259	31.1545	51.6956	BOTH	1.65933
NC_002754	95139	95849	-	SSO0116	31.1009	45.4307	BOTH	1.46075
NC_002754	456133	456918	+	SSO0526	31.1004	53.4157	BOTH	1.71752
NC_002754	1077608	1077949	-	SSO1251	31.0657	21.0334	BOTH	1.47697
NC_002754	1774144	1775268	-	SSO1958	31.0192	158.194	BOTH	5.09986
NC_002754	1645053	1646012	-	SSO1814	30.9521	17.7242	BOTH	1.74632
NC_002754	1486446	1486649	+	SSO8549	30.9097	27.1245	BOTH	1.13955
NC_002754	2504398	2505747	-	SSO2750	30.9041	49.2883	BOTH	1.59488
NC_002754	1275779	1276312	+	SSO1421	30.8955	62.9503	BOTH	2.03753
NC_002754	2678727	2680679	-	SSO2936	30.8713	29.8557	BOTH	1.03402
NC_002754	413903	415324	-	SSO0480	30.8579	69.0217	BOTH	2.23676
NC_002754	1705197	1706417	+	SSO1890	30.8442	77.4949	BOTH	2.51246
NC_002754	2170481	2171119	+	SSO2384	30.8203	58.5597	BOTH	1.90004
NC_002754	2582577	2583350	-	SSO2821	30.8014	18.4983	BOTH	1.66509
NC_002754	1658048	1659307	-	SSO1829	30.6436	41.6103	BOTH	1.35788
NC_002754	2735717	2736394	+	SSO2994	30.5762	50.9065	BOTH	1.6649
NC_002754	244748	246550	-	SSO0287	30.5652	78.8349	BOTH	2.57924
NC_002754	2429142	2430116	+	SSO2672	30.5645	37.6697	BOTH	1.23247
NC_002754	1554089	1554484	+	SSO1708	30.5376	33.0118	BOTH	1.08102
NC_002754	2187883	2189076	+	SSO2404	30.5289	64.8229	BOTH	2.12333
NC_002754	380629	381177	-	SSO0439	30.5233	39.4343	BOTH	1.29194
NC_002754	1642893	1643492	-	SSO1812	30.5202	39.0797	BOTH	1.28045
NC_002754	2447407	2447808	+	SSO2691	30.5116	53.5102	BOTH	1.75377
NC_002754	2605843	2606196	-	SSO2846	30.5007	76.2016	BOTH	2.49836
NC_002754	155103	155984	+	SSO0183	30.4575	49.9544	BOTH	1.64013
NC_002754	2136182	2137171	+	SSO2338	30.4504	140.291	BOTH	4.60721
NC_002754	415401	416033	+	SSO0481	30.4301	27.3174	BOTH	1.11395
NC_002754	842473	843159	-	SSO0986	30.4271	72.5907	BOTH	2.38572
NC_002754	15589	17808	+	SSO0017	30.349	91.0083	BOTH	2.99873
NC_002754	1149931	1150824	-	SSO1319	30.2419	36.6727	BOTH	1.21265
NC_002754	1534379	1534678	+	SSO1680	30.2323	27.4365	BOTH	1.1019
NC_002754	881006	881611	-	SSO1022	30.218	22.2569	BOTH	1.35769
NC_002754	531861	532733	-	SSO0610	30.0789	27.1758	BOTH	1.10683
NC_002754	1740013	1740423	-	SSO1921	30.0536	27.5997	BOTH	1.08891
NC_002754	1312127	1312546	-	SSO1456	30.0266	49.8995	BOTH	1.66184
NC_002754	2023658	2025271	-	SSO2200	30.0235	73.3673	BOTH	2.44366
NC_002754	2411865	2412356	-	SSO2652	30.0216	78.4462	BOTH	2.61299
NC_002754	1474711	1476120	+	SSO1624	30.0178	41.0591	BOTH	1.36782
NC_002754	2349524	2349904	+	SSO2579	29.9262	49.561	BOTH	1.65611
NC_002754	717064	718473	+	SSO0837	29.8341	54.0586	BOTH	1.81198
NC_002754	2505750	2506250	-	SSO2751	29.8271	110.585	BOTH	3.70755
NC_002754	2103749	2104255	-	SSO2294	29.8148	95.4976	BOTH	3.20302
NC_002754	1044350	1044694	+	SSO1204	29.7941	30.6743	BOTH	1.02954
NC_002754	2042766	2043119	-	SSO2221	29.7686	54.9042	BOTH	1.84436
NC_002754	167125	167655	-	SSO0194	29.7686	22.4046	BOTH	1.32869
NC_002754	1646872	1648302	+	SSO1816	29.6377	68.3942	BOTH	2.30768
NC_002754	1772463	1773191	+	SSO1954	29.622	63.8543	BOTH	2.15563
NC_002754	650696	651892	+	SSO0765	29.5142	35.075	BOTH	1.18841
NC_002754	1958425	1958892	-	SSO2131	29.3463	8.42426	BOTH	3.48355
NC_002754	355009	355788	+	SSO0405	29.2356	103.131	BOTH	3.52757
NC_002754	2571427	2572662	+	SSO2811	29.2119	67.2649	BOTH	2.30265
NC_002754	2693485	2693937	-	SSO2949	29.174	15.8795	BOTH	1.83721
NC_002754	2734689	2735147	+	SSO2992	29.169	48.6735	BOTH	1.66867
NC_002754	1590345	1591355	-	SSO1757	29.1344	44.3329	BOTH	1.52167
NC_002754	6376	7431	+	SSO0010	29.1198	144.034	BOTH	4.94624
NC_002754	2149856	2150650	+	SSO2355	29.1186	43.7626	BOTH	1.50291
NC_002754	1997307	1998119	+	SSO2174	29.1114	77.8454	BOTH	2.67406
NC_002754	1657250	1657837	-	SSO1827	29.0864	37.2893	BOTH	1.28202
NC_002754	1156629	1158419	-	SSO1327	29.082	62.4864	BOTH	2.14863
NC_002754	547921	549135	+	SSO0633	29.077	50.7229	BOTH	1.74443
NC_002754	2092022	2093347	+	SSO2283	29.0532	58.9959	BOTH	2.03062
NC_002754	259048	260112	+	SSO0305	29.0359	42.6046	BOTH	1.46731
NC_002754	2964929	2965630	-	SSO3217	28.9157	50.8411	BOTH	1.75826
NC_002754	2887379	2888815	-	SSO3139	28.8527	39.0843	BOTH	1.35461
NC_002754	996526	997824	+	SSO1155	28.7926	66.1325	BOTH	2.29686
NC_002754	1644216	1644461	+	SSO8979	28.7926	12.6526	BOTH	2.27563
NC_002754	755751	756056	+	SSO0887	28.7926	60.1261	BOTH	2.08825
NC_002754	2218254	2218586	-	SSO2442	28.7926	19.5248	BOTH	1.47467
NC_002754	1644442	1644786	-	SSO1813	28.7926	38.2928	BOTH	1.32995
NC_002754	1241293	1241898	+	SSO1392	28.7926	31.3879	BOTH	1.09014
NC_002754	2203577	2205262	-	SSO2425	28.6389	61.537	BOTH	2.14872
NC_002754	131130	131924	+	SSO0156	28.5753	43.6756	BOTH	1.52844
NC_002754	1181782	1182555	-	SSO1345	28.5694	20.1962	BOTH	1.41459
NC_002754	1371297	1371623	-	SSO1518	28.5285	15.2296	BOTH	1.87323
NC_002754	2002689	2003486	+	SSO2179	28.4679	70.381	BOTH	2.4723
NC_002754	948084	949358	-	SSO1093	28.4539	27.1245	BOTH	1.04901
NC_002754	542368	542856	-	SSO0627	28.4393	18.2467	BOTH	1.5586
NC_002754	854063	855526	-	SSO0997	28.3206	117.642	BOTH	4.15392
NC_002754	1283924	1284838	+	SSO1431	28.3206	28.045	BOTH	1.00983
NC_002754	1407806	1408669	+	SSO1562	28.2927	195.575	BOTH	6.91253
NC_002754	407678	409012	+	SSO0473	28.275	40.0498	BOTH	1.41644
NC_002754	1617122	1617568	+	SSO1784	28.2129	79.8445	BOTH	2.83007
NC_002754	158520	159971	+	SSO0186	28.1977	35.5841	BOTH	1.26195
NC_002754	1601950	1603074	+	SSO1768	28.1784	57.0556	BOTH	2.0248
NC_002754	2074577	2075821	-	SSO2261	28.1682	23.3336	BOTH	1.20719
NC_002754	1011604	1014312	+	SSO1172	28.1549	39.4988	BOTH	1.40291
NC_002754	2036095	2037138	-	SSO2213	27.9652	73.1427	BOTH	2.61549
NC_002754	2696579	2696983	+	SSO2952	27.9395	10.5886	BOTH	2.63864
NC_002754	867403	868398	-	SSO1010	27.9254	46.4589	BOTH	1.66368
NC_002754	352123	352782	-	SSO0402	27.8765	18.1303	BOTH	1.53756
NC_002754	205329	206300	-	SSO0237	27.8151	82.0475	BOTH	2.94975
NC_002754	2594590	2595291	+	SSO2832	27.8083	44.5352	BOTH	1.60151
NC_002754	1318063	1320558	+	SSO1460	27.789	25.3005	BOTH	1.09836
NC_002754	2328680	2329435	-	SSO2555	27.7643	79.8721	BOTH	2.87679
NC_002754	19647	20195	-	SSO0019	27.6913	42.4581	BOTH	1.53327
NC_002754	2078112	2078537	-	SSO2266	27.576	76.9611	BOTH	2.79087
NC_002754	435745	438549	+	SSO0504	27.5608	53.6819	BOTH	1.94776
NC_002754	371931	372701	+	SSO0427	27.4482	49.6105	BOTH	1.80742
NC_002754	579263	579772	-	SSO0675	27.4377	7.188	BOTH	3.81715
NC_002754	2768103	2769890	-	SSO3021	27.3433	68.007	BOTH	2.48715
NC_002754	1633733	1634242	+	SSO1803	27.2683	14.1048	BOTH	1.93327
NC_002754	2299422	2299814	-	SSO2530	27.2541	32.2078	BOTH	1.18176
NC_002754	2052124	2052840	+	SSO2234	27.2265	111.999	BOTH	4.11362
NC_002754	1292310	1293857	-	SSO1440	27.1186	65.1015	BOTH	2.40062
NC_002754	986048	987337	+	SSO1145	27.1186	34.3693	BOTH	1.26737
NC_002754	838169	839233	-	SSO0980	27.0894	16.821	BOTH	1.61045
NC_002754	2811643	2812542	+	SSO3056	27.0651	40.6552	BOTH	1.50213
NC_002754	403245	404993	+	SSO0469	27.0641	23.8468	BOTH	1.13491
NC_002754	1439192	1439734	-	SSO1594	27.0428	60.5057	BOTH	2.23741
NC_002754	235569	236009	-	SSO0276	27.0298	47.9938	BOTH	1.77559
NC_002754	2124780	2125265	+	SSO2324	27.0153	21.775	BOTH	1.24066
NC_002754	1847556	1848455	+	SSO2033	26.9691	48.9553	BOTH	1.81524
NC_002754	2389452	2390252	-	SSO2624	26.9594	101.29	BOTH	3.75715
NC_002754	647431	647658	+	SSO6469	26.8984	54.606	BOTH	2.03009
NC_002754	1785726	1786205	+	SSO1972	26.8131	28.5316	BOTH	1.06409
NC_002754	1465989	1466684	+	SSO1617	26.6828	48.9937	BOTH	1.83615
NC_002754	831406	832518	+	SSO0972	26.6196	15.5363	BOTH	1.71338
NC_002754	580953	581537	+	SSO0677	26.5778	17.4988	BOTH	1.51884
NC_002754	1483225	1484361	-	SSO1632	26.5135	27.0709	BOTH	1.02102
NC_002754	2213911	2215062	+	SSO2438	26.3932	136.474	BOTH	5.17079
NC_002754	569617	570948	+	SSO0660	26.3932	130.806	BOTH	4.95603
NC_002754	1895173	1895739	+	SSO2079	26.3551	25.8616	BOTH	1.01908
NC_002754	1021402	1021932	-	SSO1178	26.3526	32.174	BOTH	1.22091
NC_002754	2485358	2486491	-	SSO2730	26.2028	23.3608	BOTH	1.12166
NC_002754	37479	37811	-	SSO0043	26.1987	16.8245	BOTH	1.55717
NC_002754	2034192	2035244	+	SSO2211	26.1677	33.697	BOTH	1.28774
NC_002754	35370	35828	+	SSO0040	26.158	57.1122	BOTH	2.18336
NC_002754	725327	725485	-	SSO6663	26.0763	3.91515	BOTH	6.66037
NC_002754	554869	555972	+	SSO0640	26.0542	40.1598	BOTH	1.54139
NC_002754	727824	728192	+	SSO0847	25.9836	9.74719	BOTH	2.66575
NC_002754	346650	348368	+	SSO0395	25.9787	124.655	BOTH	4.79834
NC_002754	2645761	2646066	-	SSO2893	25.9698	14.9185	BOTH	1.74078
NC_002754	849392	851026	+	SSO0991	25.8869	94.0002	BOTH	3.63118
NC_002754	2050090	2050752	-	SSO2231	25.7961	40.5825	BOTH	1.5732
NC_002754	1489637	1489981	-	SSO1637	25.7882	10.6257	BOTH	2.42695
NC_002754	2892479	2893825	-	SSO3143	25.7787	32.6582	BOTH	1.26687
NC_002754	1240458	1241333	+	SSO1391	25.7359	21.7925	BOTH	1.18095
NC_002754	2526654	2527580	+	SSO2769	25.7177	64.5415	BOTH	2.50962
NC_002754	23895	24512	+	SSO0025	25.7177	20.9293	BOTH	1.22879
NC_002754	108316	109137	-	SSO0128	25.6401	131.099	BOTH	5.11302
NC_002754	445862	446953	+	SSO0515	25.6286	29.8333	BOTH	1.16406
NC_002754	668738	670138	+	SSO0786	25.5866	35.349	BOTH	1.38155
NC_002754	3057	3743	+	SSO0006	25.3979	17.4177	BOTH	1.45816
NC_002754	1850848	1852560	+	SSO2037	25.3637	105.508	BOTH	4.15979
NC_002754	2089224	2090636	-	SSO2280	25.3082	23.4964	BOTH	1.07711
NC_002754	2657556	2658920	+	SSO2907	25.2489	55.6888	BOTH	2.20559
NC_002754	2112167	2113201	-	SSO2309	25.204	22.5881	BOTH	1.11581
NC_002754	2673614	2674066	-	SSO2927	25.1697	16.3376	BOTH	1.5406
NC_002754	466421	466963	-	SSO0538	25.1339	44.0736	BOTH	1.75355
NC_002754	1057452	1058930	+	SSO1218	25.1132	26.9375	BOTH	1.07264
NC_002754	835585	836970	+	SSO0977	25.0533	39.2748	BOTH	1.56765
NC_002754	303854	304849	-	SSO0358	24.9767	26.3198	BOTH	1.05377
NC_002754	561606	562142	-	SSO0648	24.9322	45.3389	BOTH	1.81849
NC_002754	534485	534976	-	SSO0613	24.9302	17.8542	BOTH	1.39632
NC_002754	1332122	1332589	-	SSO1471	24.9167	36.2095	BOTH	1.45322
NC_002754	155965	156678	+	SSO0184	24.8004	21.8934	BOTH	1.13278
NC_002754	2037178	2037543	+	SSO2214	24.7805	33.2609	BOTH	1.34222
NC_002754	246892	247233	-	SSO0288	24.7515	58.8531	BOTH	2.37775
NC_002754	1990523	1990903	-	SSO2164	24.7118	50.8318	BOTH	2.05699
NC_002754	2730848	2731819	+	SSO2988	24.7048	49.3851	BOTH	1.99901
NC_002754	2031660	2032370	-	SSO2208	24.4191	25.1961	BOTH	1.03182
NC_002754	2442815	2443225	-	SSO2684	24.3792	20.5315	BOTH	1.1874
NC_002754	2122901	2123659	-	SSO2322	24.3542	13.3961	BOTH	1.81801
NC_002754	552331	553551	+	SSO0638	24.3358	23.1692	BOTH	1.05035
NC_002754	1710446	1711084	-	SSO1896	24.3318	39.5089	BOTH	1.62375
NC_002754	2684189	2684917	-	SSO2939	24.2901	15.2757	BOTH	1.59011
NC_002754	1441519	1443069	-	SSO1597	24.2816	33.4912	BOTH	1.37928
NC_002754	2659937	2661829	-	SSO2909	24.2752	184.337	BOTH	7.59363
NC_002754	2447805	2449580	-	SSO2693	24.2695	31.9744	BOTH	1.31748
NC_002754	566143	566694	+	SSO0655	24.2547	43.8563	BOTH	1.80816
NC_002754	1251428	1252072	+	SSO1403	24.2394	34.3157	BOTH	1.4157
NC_002754	2167742	2169007	-	SSO2380	24.2213	26.2793	BOTH	1.08497
NC_002754	648346	648834	-	SSO0762	24.1999	18.2467	BOTH	1.32627
NC_002754	227300	227599	+	SSO0262	24.1858	11.7585	BOTH	2.05688
NC_002754	1167837	1168136	-	SSO1332	24.1858	47.7256	BOTH	1.97329
NC_002754	1383858	1384883	-	SSO1532	24.1622	19.0784	BOTH	1.26647
NC_002754	1345827	1346141	+	SSO1490	24.131	16.2489	BOTH	1.48508
NC_002754	1599778	1600218	-	SSO1766	24.0918	30.2706	BOTH	1.25647
NC_002754	2592469	2594226	-	SSO2831	24.0757	45.3248	BOTH	1.88259
NC_002754	285759	286874	-	SSO0333	24.0712	35.1416	BOTH	1.4599
NC_002754	2491146	2492459	-	SSO2737	23.9938	22.2136	BOTH	1.08014
NC_002754	2073908	2074570	-	SSO2259	23.9721	25.4553	BOTH	1.06187
NC_002754	1196495	1196905	-	SSO1360	23.9588	65.8018	BOTH	2.74645
NC_002754	2489486	2489770	-	SSO11020	23.9433	18.4447	BOTH	1.29812
NC_002754	115476	117074	-	SSO0140	23.9308	22.8828	BOTH	1.0458
NC_002754	112358	112801	+	SSO0134	23.929	24.7695	BOTH	1.03512
NC_002754	2934749	2935120	-	SSO3188	23.9164	55.0366	BOTH	2.3012
NC_002754	1350854	1351189	+	SSO1497	23.9082	29.4374	BOTH	1.23127
NC_002754	247569	248924	-	SSO0290	23.8877	31.9313	BOTH	1.33673
NC_002754	895429	896043	-	SSO1034	23.8768	48.4735	BOTH	2.03015
NC_002754	538820	539326	-	SSO0619	23.8519	9.54976	BOTH	2.49764
NC_002754	1630939	1631898	-	SSO1801	23.7539	11.0956	BOTH	2.14083
NC_002754	429334	430944	+	SSO0497	23.7526	87.7582	BOTH	3.69468
NC_002754	426293	427126	+	SSO0495	23.7177	19.9873	BOTH	1.18664
NC_002754	1594043	1595182	+	SSO1759	23.716	29.7299	BOTH	1.25358
NC_002754	2205318	2205746	+	SSO2426	23.5576	39.6625	BOTH	1.68364
NC_002754	1712368	1712940	+	SSO1898	23.5165	23.5387	BOTH	1.00094
NC_002754	2775506	2776465	+	SSO3028	23.394	19.0211	BOTH	1.2299
NC_002754	585724	587703	-	SSO0683	23.3395	19.0386	BOTH	1.22591
NC_002754	2635873	2636832	+	SSO2882	23.304	18.8049	BOTH	1.23925
NC_002754	2731824	2732801	-	SSO2989	23.2284	17.1151	BOTH	1.35719
NC_002754	1343471	1344274	+	SSO1487	23.206	22.5397	BOTH	1.02956
NC_002754	704511	705065	-	SSO0822	23.1897	10.8425	BOTH	2.13878
NC_002754	533862	534488	-	SSO0612	23.1443	15.3338	BOTH	1.50937
NC_002754	2715783	2716376	+	SSO2972	23.1213	71.0307	BOTH	3.07208
NC_002754	2184160	2184975	+	SSO2397	23.0764	32.719	BOTH	1.41785
NC_002754	1957357	1958373	+	SSO2130	23.0171	19.3152	BOTH	1.19166
NC_002754	451340	451531	-	SSO6024	22.9441	39.267	BOTH	1.71142
NC_002754	1718631	1719182	-	SSO1902	22.8463	12.0291	BOTH	1.89925
NC_002754	1549654	1550073	+	SSO1699	22.8284	23.5499	BOTH	1.0316
NC_002754	1550386	1550775	-	SSO1701	22.8126	10.1091	BOTH	2.25664
NC_002754	2530455	2532050	-	SSO2774	22.7851	48.712	BOTH	2.13789
NC_002754	1224793	1225251	+	SSO1384	22.7706	36.6181	BOTH	1.60813
NC_002754	1410329	1411699	-	SSO1565	22.7443	111.344	BOTH	4.89548
NC_002754	724198	724509	-	SSO0844	22.7019	22.1691	BOTH	1.02403
NC_002754	318365	319240	-	SSO0375	22.6791	40.7425	BOTH	1.79648
NC_002754	581925	582593	+	SSO0678	22.5951	23.2626	BOTH	1.02954
NC_002754	2390314	2391477	+	SSO2625	22.5592	121.935	BOTH	5.4051
NC_002754	2428073	2429161	+	SSO2670	22.5265	36.9656	BOTH	1.64099
NC_002754	1598378	1598818	-	SSO1764	22.5248	78.1076	BOTH	3.46762
NC_002754	2772494	2773108	+	SSO3023	22.4723	35.2024	BOTH	1.56648
NC_002754	2052811	2053461	-	SSO2236	22.4237	41.968	BOTH	1.87159
NC_002754	396396	396959	-	SSO0461	22.3602	15.575	BOTH	1.43565
NC_002754	665401	666081	+	SSO0782	22.3238	13.4069	BOTH	1.66509
NC_002754	1525316	1526503	-	SSO1672	22.3216	10.0142	BOTH	2.229
NC_002754	17801	19660	+	SSO0018	22.1053	41.4262	BOTH	1.87404
NC_002754	1782460	1782846	-	SSO1968	22.0967	41.1073	BOTH	1.86034
NC_002754	291003	291644	-	SSO0340	22.0654	26.5035	BOTH	1.20113
NC_002754	1971907	1972302	-	SSO2144	22.0307	11.8773	BOTH	1.85487
NC_002754	2489184	2489489	-	SSO2734	22.0179	32.5494	BOTH	1.47832
NC_002754	1771849	1772328	+	SSO1953	21.9544	24.6409	BOTH	1.12237
NC_002754	2315793	2318141	+	SSO2547	21.953	21.5247	BOTH	1.0199
NC_002754	2498716	2499501	+	SSO2744	21.8692	22.7039	BOTH	1.03817
NC_002754	718611	719330	+	SSO0838	21.8344	17.6762	BOTH	1.23525
NC_002754	2049579	2050109	+	SSO2230	21.7978	87.9249	BOTH	4.03366
NC_002754	1194295	1194774	+	SSO1356	21.7744	18.4447	BOTH	1.18053
NC_002754	2676674	2677087	-	SSO2933	21.6988	16.8742	BOTH	1.28591
NC_002754	1320555	1320905	+	SSO1461	21.656	10.8382	BOTH	1.99811
NC_002754	1266753	1267172	+	SSO1413	21.5945	44.3002	BOTH	2.05146
NC_002754	1924213	1924776	+	SSO2102	21.5945	23.669	BOTH	1.09607
NC_002754	405273	406178	-	SSO0470	21.5468	19.2387	BOTH	1.11997
NC_002754	439809	440795	+	SSO0506	21.5288	9.811	BOTH	2.19436
NC_002754	2373162	2373743	-	SSO2607	21.5203	12.9541	BOTH	1.66127
NC_002754	2913356	2914504	-	SSO3165	21.5005	24.019	BOTH	1.11714
NC_002754	2302377	2303117	+	SSO2535	21.4488	13.3481	BOTH	1.60687
NC_002754	1632138	1632359	+	SSO8948	21.3999	20.5633	BOTH	1.04068
NC_002754	1560255	1560485	+	SSO8760	21.314	44.3152	BOTH	2.07916
NC_002754	1035783	1036424	-	SSO1192	21.2581	41.2635	BOTH	1.94107
NC_002754	1435680	1436033	+	SSO1589	21.2285	55.4904	BOTH	2.61396
NC_002754	1773710	1774120	-	SSO1957	21.2267	45.102	BOTH	2.12478
NC_002754	1903244	1904257	+	SSO2090	21.2111	43.9289	BOTH	2.07103
NC_002754	1561035	1561487	-	SSO1719	21.1654	10.0774	BOTH	2.10029
NC_002754	1226116	1226862	-	SSO1386	21.1608	34.2597	BOTH	1.61901
NC_002754	1663148	1663384	-	SSO9043	21.1389	18.6782	BOTH	1.13174
NC_002754	238786	239298	+	SSO0280	21.0472	75.9091	BOTH	3.6066
NC_002754	1207453	1207842	-	SSO1372	21.0408	8.86764	BOTH	2.37276
NC_002754	1931081	1931446	+	SSO2109	21.0045	17.5754	BOTH	1.19511
NC_002754	321348	322277	-	SSO0378	20.9907	37.1125	BOTH	1.76804
NC_002754	2077175	2078122	-	SSO2265	20.9567	54.5023	BOTH	2.60072
NC_002754	1036421	1037674	-	SSO1193	20.9401	64.5895	BOTH	3.08449
NC_002754	956910	957404	+	SSO1106	20.9401	24.4532	BOTH	1.16777
NC_002754	2332633	2333862	+	SSO2559	20.9273	19.7943	BOTH	1.05724
NC_002754	1694683	1695507	-	SSO1880	20.8354	52.9866	BOTH	2.5431
NC_002754	2098820	2099599	+	SSO2289	20.8193	36.2686	BOTH	1.74207
NC_002754	1996402	1997316	+	SSO2172	20.7684	49.8914	BOTH	2.40227
[truncated: 815 more rows]

## Sheet: high Sm2
contig	start	end	strand	gene_id	FPKM1	FPKM2	binding	fc
NC_002754	333735	337430	+	SSO0389	27711.8	44969.7	BOTH	1.62276
NC_002754	337472	338665	+	SSO0390	70907.2	37051.8	BOTH	1.91373
NC_002754	2157622	2158068	+	SSO2364	5378.23	31215	BOTH	5.80396
NC_002754	816731	817033	-	SSO0962	14315.1	24690.8	BOTH	1.72481
NC_002754	143195	143365	-	SSO5336	14385.2	22409.9	BOTH	1.55784
NC_002754	2158065	2158346	+	SSO10285	6774.23	19411.8	BOTH	2.86554
NC_002754	2393762	2393995	+	SSO10788	23677.1	19119.8	BOTH	1.23836
NC_002754	1606986	1607255	-	SSO8892	11359.3	12396.1	BOTH	1.09127
NC_002754	856747	858180	+	SSO0999	2770.3	11889.6	BOTH	4.29183
NC_002754	2369804	2370178	+	SSO2603	11142.3	11167.9	BOTH	1.0023
NC_002754	2606453	2608117	-	SSO2847	3847.01	10684.4	BOTH	2.77732
NC_002754	2379111	2379581	+	SSO2613	14032.3	10256.3	BOTH	1.36816
NC_002754	1638041	1638670	-	SSO1807	31496.7	9304.58	BOTH	3.38507
NC_002754	968854	969285	+	SSO1126	1689.97	8864.66	BOTH	5.24546
NC_002754	2418937	2419497	+	SSO2661	6134.52	8562.23	BOTH	1.39575
NC_002754	177200	177619	-	SSO0205	4941.64	8295.99	BOTH	1.67879
NC_002754	751217	751882	+	SSO0881	6553.17	8229.7	BOTH	1.25583
NC_002754	2960304	2960360	-	SSOs04	1547.22	8093.82	BOTH	5.23119
NC_002754	969297	969539	+	SSO7239	2303.05	7921.25	BOTH	3.43946
NC_002754	322456	323946	+	SSO0379	3109.37	7547.11	BOTH	2.42721
NC_002754	2418081	2419055	+	SSO2660	4265.12	7386.03	BOTH	1.73173
NC_002754	500453	500761	+	SSO0567	20294	7096.95	BOTH	2.85954
NC_002754	2345414	2345728	+	SSO2574	2926.43	7018.64	BOTH	2.39837
NC_002754	2068737	2069294	-	SSO2253	1396.44	6729.09	BOTH	4.81874
NC_002754	599211	599798	-	SSO0694	3172.77	6350.95	BOTH	2.0017
NC_002754	2415240	2416775	-	SSO2657	1251.3	6099.31	BOTH	4.87439
NC_002754	78293	79423	-	SSO0097	2448.98	5885.18	BOTH	2.40312
NC_002754	2348373	2348657	+	SSO10704	3039.59	5816.63	BOTH	1.91362
NC_002754	239345	241018	+	SSO0282	5592.01	5709.38	BOTH	1.02099
NC_002754	2419490	2419900	+	SSO2662	5685.6	5674.94	BOTH	1.00188
NC_002754	574064	574576	+	SSO0665	1653.98	5616.06	BOTH	3.39549
NC_002754	599801	601210	-	SSO0695	2672.14	5538.21	BOTH	2.07258
NC_002754	2413438	2413560	-	SSO10828	6082.97	5226.37	BOTH	1.1639
NC_002754	736622	738301	-	SSO0862	5311.16	4616.57	BOTH	1.15046
NC_002754	2413574	2415247	-	SSO2656	1649.28	4559.61	BOTH	2.7646
NC_002754	851273	852463	+	SSO0992	1013.33	4426.61	BOTH	4.36839
NC_002754	417750	418706	+	SSO0485	2208.1	4372.88	BOTH	1.98038
NC_002754	2320224	2320430	+	SSO10610	5250.27	4334.84	BOTH	1.21118
NC_002754	925904	927847	+	SSO1069	4039.41	4075.3	BOTH	1.00889
NC_002754	2931358	2932581	-	SSO3184	2834.87	4069.02	BOTH	1.43534
NC_002754	294560	294880	-	SSO0342	2781.31	4038.65	BOTH	1.45207
NC_002754	2416772	2417281	-	SSO2658	893.926	3891.02	BOTH	4.35273
NC_002754	38481	40262	+	SSO0044	10953.9	3794.67	BOTH	2.88665
NC_002754	1861881	1863143	+	SSO2044	1884.38	3709.64	BOTH	1.96863
NC_002754	642176	642415	-	SSO6454	2954.48	3509.97	BOTH	1.18801
NC_002754	1714872	1715066	+	SSO9180	2349.03	3325.36	BOTH	1.41563
NC_002754	41328	41528	+	SSO5098	13710	3294.23	BOTH	4.16182
NC_002754	270412	271047	+	SSO0316	1141.11	3289.48	BOTH	2.8827
NC_002754	954091	954474	-	SSO1101	3203.4	3182.25	BOTH	1.00665
NC_002754	2959531	2960316	+	SSO3213	619.811	3160.94	BOTH	5.09985
NC_002754	1830100	1830342	+	SSO9500	1518.9	3141.29	BOTH	2.06814
NC_002754	2932565	2932759	-	SSO12142	1440.07	3074.94	BOTH	2.13527
NC_002754	601227	601661	-	SSO0696	1691.22	3044.96	BOTH	1.80045
NC_002754	40264	41331	+	SSO0045	12688.1	3014.62	BOTH	4.20885
NC_002754	834345	834527	+	SSO6901	4606.82	2949.26	BOTH	1.56203
NC_002754	611680	612735	-	SSO0719	713.354	2940.15	BOTH	4.12158
NC_002754	2383915	2386095	-	SSO2619	2560.8	2936.21	BOTH	1.1466
NC_002754	502607	503623	+	SSO0570	1141.26	2907.96	BOTH	2.54803
NC_002754	2404133	2404567	+	SSO2642	1733.51	2896.93	BOTH	1.67113
NC_002754	1595237	1595479	-	SSO8861	1050.04	2853.23	BOTH	2.71726
NC_002754	2425098	2427179	+	SSO2669	3913.85	2807.63	BOTH	1.394
NC_002754	2209901	2210416	-	SSO2433	1828.83	2748.74	BOTH	1.503
NC_002754	2720435	2720492	-	SSOs05	561.456	2709.46	BOTH	4.82578
NC_002754	641976	642161	-	SSO6453	1336.07	2694.56	BOTH	2.01678
NC_002754	416056	416394	+	SSO0482	1960.7	2638.98	BOTH	1.34594
NC_002754	627926	628651	-	SSO0738	866.515	2637.32	BOTH	3.0436
NC_002754	73708	74100	-	SSO0091	3731.61	2583.84	BOTH	1.44421
NC_002754	610623	610868	-	SSO6401	576.555	2570.17	BOTH	4.4578
NC_002754	624699	624920	-	SSO6418	1561.03	2505.61	BOTH	1.6051
NC_002754	2620566	2621144	+	SSO2864	624.337	2491.23	BOTH	3.99019
NC_002754	493405	495510	-	SSO0559	1065.45	2481.85	BOTH	2.3294
NC_002754	944625	945254	+	SSO1088	942.478	2476.42	BOTH	2.62756
NC_002754	2043206	2044204	+	SSO2222	835.591	2456.45	BOTH	2.93978
NC_002754	502286	502573	+	SSO6179	837.685	2453.29	BOTH	2.92865
NC_002754	2189109	2189342	+	SSO10340	847.906	2403.72	BOTH	2.83489
NC_002754	397707	398309	-	SSO0464	2166.47	2386.8	BOTH	1.1017
NC_002754	792761	793129	+	SSO0931	1708.83	2381.88	BOTH	1.39386
NC_002754	909262	911556	-	SSO1052	463.58	2375.57	BOTH	5.1244
NC_002754	816329	816649	-	SSO0961	1039.23	2358.38	BOTH	2.26936
NC_002754	2408848	2409285	+	SSO2648	1604.5	2350.91	BOTH	1.4652
NC_002754	529769	530119	-	SSO0605	989.531	2266.37	BOTH	2.29035
NC_002754	2463617	2465053	+	SSO2712	843.461	2175.87	BOTH	2.57969
NC_002754	958736	959071	-	SSO1110	1322.92	2099.94	BOTH	1.58735
NC_002754	1113843	1116323	+	SSO1288	837.702	2095.63	BOTH	2.50164
NC_002754	577067	577486	+	SSO0670	672.308	2060.86	BOTH	3.06536
NC_002754	42978	43367	+	SSO0048	2095.22	2050.55	BOTH	1.02178
NC_002754	945251	946060	+	SSO1090	1061.06	2034.38	BOTH	1.91731
NC_002754	1606108	1606950	-	SSO1774	743.177	2000.12	BOTH	2.6913
NC_002754	80426	81109	+	SSO0099	1240.99	1971.07	BOTH	1.58831
NC_002754	2146765	2147961	+	SSO2353	1084.16	1962.98	BOTH	1.8106
NC_002754	2356224	2356652	+	SSO2588	1194.99	1950.24	BOTH	1.632
NC_002754	1431061	1432560	+	SSO1584	959.716	1893.25	BOTH	1.97272
NC_002754	2382794	2383825	-	SSO2618	307.177	1872.22	BOTH	6.09491
NC_002754	276282	277514	+	SSO0324	911.626	1851.54	BOTH	2.03103
NC_002754	173686	173949	-	SSO5410	341.258	1840.8	BOTH	5.39416
NC_002754	969608	970450	+	SSO1127	522.571	1837.17	BOTH	3.51563
NC_002754	1798337	1798930	+	SSO1986	1482.82	1817.92	BOTH	1.22599
NC_002754	797497	797655	-	SSO6817	1548.83	1775.3	BOTH	1.14622
NC_002754	127134	127763	+	SSO0151	1980.66	1752.46	BOTH	1.13021
NC_002754	2154229	2154594	+	SSO2359	1256.26	1743.55	BOTH	1.3879
NC_002754	1727019	1728281	+	SSO1907	924.989	1707.01	BOTH	1.84544
NC_002754	610870	611673	-	SSO0718	399.874	1701.57	BOTH	4.25528
NC_002754	2812735	2813703	+	SSO3058	254.855	1694.93	BOTH	6.65056
NC_002754	1685257	1685937	+	SSO1870	550.611	1677.09	BOTH	3.04586
NC_002754	577462	577875	+	SSO0671	509.713	1645.49	BOTH	3.22826
NC_002754	2743532	2744632	-	SSO3003	1750.54	1639.23	BOTH	1.06791
NC_002754	972029	973135	+	SSO1131	1238.63	1638.03	BOTH	1.32245
NC_002754	2975459	2976436	+	SSO3231	512.615	1633.92	BOTH	3.18743
NC_002754	642880	643587	+	SSO0758	1863.83	1631.3	BOTH	1.14255
NC_002754	275424	275813	+	SSO0322	713.393	1613.56	BOTH	2.26181
NC_002754	2611121	2612461	-	SSO2852	1713.77	1602.36	BOTH	1.06953
NC_002754	2153347	2154228	+	SSO2358	693.079	1586.54	BOTH	2.28912
NC_002754	601664	602140	-	SSO0697	599.575	1558.23	BOTH	2.59889
NC_002754	1247084	1248040	+	SSO1399	470.701	1545.47	BOTH	3.28333
NC_002754	1150918	1151769	+	SSO1320	684.839	1541.74	BOTH	2.25124
NC_002754	2137263	2138336	+	SSO2339	466.473	1531.86	BOTH	3.28393
NC_002754	464828	465232	-	SSO0536	2972.46	1523.39	BOTH	1.95121
NC_002754	1775885	1776751	+	SSO1960	381.178	1522.88	BOTH	3.9952
NC_002754	806988	807533	-	SSO0951	327.16	1505.47	BOTH	4.60164
NC_002754	968295	968696	-	SSO1125	642.462	1497.43	BOTH	2.33076
NC_002754	304893	305294	+	SSO0359	831.548	1495.19	BOTH	1.79808
NC_002754	305563	306456	+	SSO0360	507.446	1483.93	BOTH	2.92431
NC_002754	13020	13880	-	SSO0015	2891.7	1468.34	BOTH	1.96936
NC_002754	2681354	2682670	-	SSO2938	2170.79	1457.19	BOTH	1.48971
NC_002754	2152400	2153350	+	SSO2357	550.239	1456.96	BOTH	2.64786
NC_002754	233827	234093	+	SSO5544	538.648	1435.94	BOTH	2.66582
NC_002754	907818	908105	+	SSO7111	346.711	1430.18	BOTH	4.125
NC_002754	448668	448982	-	SSO0520	367.723	1427.27	BOTH	3.88137
NC_002754	790181	792706	+	SSO0929	3341.62	1425.93	BOTH	2.34347
NC_002754	983163	984278	-	SSO1142	1031.43	1409.38	BOTH	1.36644
NC_002754	371678	371830	+	SSO5826	1135.33	1368.43	BOTH	1.20531
NC_002754	203519	205267	-	SSO0235	1899.82	1346.26	BOTH	1.41119
NC_002754	876820	877941	-	SSO1018	976.486	1341.68	BOTH	1.37399
NC_002754	2394008	2395165	+	SSO2629	802.911	1341.24	BOTH	1.67047
NC_002754	275795	276304	+	SSO0323	806.871	1338.87	BOTH	1.65933
NC_002754	991959	993335	+	SSO1151	972.488	1323.83	BOTH	1.36128
NC_002754	2935330	2936877	+	SSO3189	407.393	1321.06	BOTH	3.24273
NC_002754	140783	142498	-	SSO0170	263.966	1320.75	BOTH	5.0035
NC_002754	2395167	2395547	+	SSO2631	1130.39	1320.17	BOTH	1.16789
NC_002754	352910	353668	+	SSO0403	484.809	1310.99	BOTH	2.70415
NC_002754	394844	395194	-	SSO0458	1347.35	1305.91	BOTH	1.03173
NC_002754	623597	623977	-	SSO0730	926.352	1296.94	BOTH	1.40005
NC_002754	2313850	2314380	-	SSO2544	1464.52	1289.7	BOTH	1.13555
NC_002754	1974141	1974575	+	SSO2146	1083.6	1287.79	BOTH	1.18844
NC_002754	277514	278572	+	SSO0325	778.543	1265.92	BOTH	1.62601
NC_002754	1430039	1430932	+	SSO1583	434.208	1253.06	BOTH	2.88586
NC_002754	979183	982992	-	SSO1141	764.931	1252.08	BOTH	1.63685
NC_002754	140169	140723	-	SSO0169	2370.64	1242.27	BOTH	1.90831
NC_002754	2387230	2388240	-	SSO2621	498.36	1240.23	BOTH	2.48862
NC_002754	2275798	2276241	-	SSO2507	868.253	1235.05	BOTH	1.42245
NC_002754	132412	132582	+	SSO5317	271.257	1230.05	BOTH	4.53463
NC_002754	527778	529298	-	SSO0604	579.26	1223.28	BOTH	2.1118
NC_002754	2018018	2018821	+	SSO2195	336.165	1220.24	BOTH	3.62989
NC_002754	970658	971971	+	SSO1129	401.716	1213.85	BOTH	3.02167
NC_002754	2399552	2400400	+	SSO2636	177.029	1192.71	BOTH	6.73739
NC_002754	503620	504222	+	SSO0571	912.769	1185.6	BOTH	1.2989
NC_002754	2396744	2397097	+	SSO2633	999.445	1185.23	BOTH	1.18589
NC_002754	2926180	2927595	-	SSO3180	218.873	1184.15	BOTH	5.41024
NC_002754	189049	189375	-	SSO0221	350.002	1173.31	BOTH	3.3523
NC_002754	2087490	2088791	-	SSO2279	204.335	1163.05	BOTH	5.69187
NC_002754	574555	575757	-	SSO0666	508.502	1162.57	BOTH	2.28626
NC_002754	1016716	1018521	+	SSO1175	527.689	1142.38	BOTH	2.16486
NC_002754	2010928	2011773	+	SSO2186	1838.85	1135.95	BOTH	1.61877
NC_002754	1009834	1011405	-	SSO1171	225.066	1134.8	BOTH	5.04206
NC_002754	958388	958753	+	SSO1109	1381.81	1114.81	BOTH	1.23951
NC_002754	1422717	1424012	-	SSO1578	685.824	1107.38	BOTH	1.61466
NC_002754	596824	597690	-	SSO0691	1020.69	1104.05	BOTH	1.08167
NC_002754	1681749	1682180	+	SSO1865	733.612	1094.51	BOTH	1.49195
NC_002754	2029637	2030356	+	SSO2205	157.04	1087.76	BOTH	6.92663
NC_002754	908102	908302	+	SSO7114	377.742	1079.84	BOTH	2.85867
NC_002754	1982669	1983019	+	SSO2155	528.603	1078.11	BOTH	2.03954
NC_002754	1587105	1588097	+	SSO1752	676.496	1061.68	BOTH	1.56939
NC_002754	563330	563821	+	SSO0651	869.923	1060.15	BOTH	1.21867
NC_002754	278497	279063	+	SSO0326	894.247	1058.62	BOTH	1.18381
NC_002754	2381905	2382801	-	SSO2617	221.771	1039.6	BOTH	4.68771
NC_002754	2060221	2060892	+	SSO2246	570.197	1035.04	BOTH	1.81524
NC_002754	85752	86957	+	SSO0104	452.445	1029.08	BOTH	2.27449
NC_002754	630134	630784	-	SSO0742	1141.62	1020.73	BOTH	1.11844
NC_002754	233371	233670	+	SSO0273	416.917	1009.85	BOTH	2.42218
NC_002754	57232	57591	-	SSO0070	296.324	998.895	BOTH	3.37096
NC_002754	500274	500432	+	SSO6175	2272.44	998.362	BOTH	2.27617
NC_002754	2356652	2357785	+	SSO2589	705.343	993.903	BOTH	1.40911
NC_002754	2642979	2643782	+	SSO2890	135.798	993.295	BOTH	7.3145
NC_002754	993328	994557	+	SSO1152	1621.38	983.361	BOTH	1.64881
NC_002754	933302	933703	+	SSO1075	358.619	977.637	BOTH	2.72612
NC_002754	2178312	2178830	-	SSO2390	388.617	959.55	BOTH	2.46914
NC_002754	905678	906418	+	SSO1047	225.095	956.678	BOTH	4.2501
NC_002754	143428	143940	+	SSO0172	271.257	956.077	BOTH	3.52462
NC_002754	2380930	2381904	-	SSO2616	200.308	953.165	BOTH	4.75849
NC_002754	271082	272167	+	SSO0317	578.239	949.175	BOTH	1.64149
NC_002754	756108	757385	+	SSO0888	127.269	941.393	BOTH	7.39689
NC_002754	57588	58385	-	SSO0071	318.559	936.189	BOTH	2.93883
NC_002754	2172218	2174068	+	SSO2386	139.997	935.313	BOTH	6.68097
NC_002754	1653672	1654013	+	SSO1823	413.452	935.178	BOTH	2.26188
NC_002754	56786	57235	-	SSO0069	377.375	933.147	BOTH	2.47273
NC_002754	176721	177188	+	SSO0203	1760.41	921.939	BOTH	1.90947
NC_002754	1798944	1799870	+	SSO1987	1369.56	920.444	BOTH	1.48793
NC_002754	2581293	2581580	+	SSO11231	511.969	918.392	BOTH	1.79384
NC_002754	829350	829407	-	SSOs02	373.808	918.259	BOTH	2.4565
NC_002754	2210413	2211249	-	SSO2434	750.569	915.623	BOTH	1.21991
NC_002754	748150	749340	-	SSO0878	137.146	911.723	BOTH	6.64784
NC_002754	699058	699834	+	SSO0814	941.93	908.614	BOTH	1.03667
NC_002754	2150698	2152398	+	SSO2356	314.434	904.993	BOTH	2.87817
NC_002754	745781	746833	-	SSO0874	481.272	903.382	BOTH	1.87707
NC_002754	136398	136799	+	SSO0164	453.806	883.693	BOTH	1.94729
NC_002754	627207	627908	-	SSO0737	387.839	876.418	BOTH	2.25975
NC_002754	2003859	2007092	-	SSO2181	418.481	876.123	BOTH	2.09358
NC_002754	924674	925195	-	SSO1067	1549.51	873.34	BOTH	1.77423
NC_002754	804848	805915	+	SSO0949	221.687	866.279	BOTH	3.90767
NC_002754	1065792	1066598	+	SSO1227	1562.94	863.523	BOTH	1.80995
NC_002754	224131	224382	-	SSO5522	329.744	862.948	BOTH	2.61702
NC_002754	1648543	1648803	-	SSO8998	158.194	861.017	BOTH	5.44279
NC_002754	1840170	1840364	-	SSO9535	1149.93	853.067	BOTH	1.348
NC_002754	172438	173670	-	SSO0199	210.445	849.813	BOTH	4.03817
NC_002754	1424009	1424695	-	SSO1579	614.578	848.435	BOTH	1.38052
NC_002754	746826	748166	-	SSO0876	146.991	842.338	BOTH	5.73056
NC_002754	279044	279547	+	SSO0327	1117.09	837.971	BOTH	1.33308
NC_002754	751957	754356	+	SSO0883	1705.21	832.634	BOTH	2.04797
NC_002754	2059760	2060224	+	SSO2245	329.35	831.647	BOTH	2.52511
NC_002754	372723	373058	+	SSO0428	243.195	831.452	BOTH	3.41887
NC_002754	2446903	2447271	+	SSO2690	806.427	828.136	BOTH	1.02692
NC_002754	2320573	2324499	+	SSO2551	220.861	813.032	BOTH	3.6812
NC_002754	385794	386723	-	SSO0446	813.624	812.533	BOTH	1.00134
NC_002754	768014	768232	-	SSO6759	238.624	800.954	BOTH	3.35656
NC_002754	2147932	2149548	-	SSO2354	2466.87	798.314	BOTH	3.0901
NC_002754	973849	974541	+	SSO1134	342.146	794.579	BOTH	2.32234
NC_002754	609895	610611	-	SSO0716	404.181	787.179	BOTH	1.94759
NC_002754	852456	852767	+	SSO0994	171.925	782.126	BOTH	4.54922
NC_002754	58397	58795	-	SSO0072	411.323	776.445	BOTH	1.88768
NC_002754	943500	944810	-	SSO1089	288.98	774.403	BOTH	2.67978
NC_002754	416431	416748	+	SSO0483	447.372	772.371	BOTH	1.72646
NC_002754	2577155	2578105	+	SSO2816	1213.92	771.608	BOTH	1.57324
NC_002754	859006	859809	+	SSO1001	184.144	770.135	BOTH	4.18224
NC_002754	622874	623575	-	SSO0729	487.998	770.105	BOTH	1.57809
NC_002754	165619	166320	-	SSO0192	439.395	764.785	BOTH	1.74054
NC_002754	964453	965712	-	SSO1119	435.797	760.843	BOTH	1.74587
NC_002754	47785	48516	+	SSO0055	2218.8	757.253	BOTH	2.93007
NC_002754	302737	303792	-	SSO0356	1117.6	753.114	BOTH	1.48396
NC_002754	2618490	2620490	-	SSO2863	705.786	752.72	BOTH	1.0665
NC_002754	243568	244716	-	SSO0286	175.161	739.593	BOTH	4.22235
NC_002754	356770	357768	+	SSO0407	278.156	738.064	BOTH	2.65342
NC_002754	2720217	2721179	-	SSO2977	234.467	733.406	BOTH	3.12797
NC_002754	551602	552057	+	SSO0637	466.365	730.507	BOTH	1.56639
NC_002754	2969724	2971064	-	SSO3224	976.373	724.738	BOTH	1.34721
NC_002754	886455	886865	+	SSO1027	823.427	723.483	BOTH	1.13814
NC_002754	2574051	2574533	-	SSO2813	253.053	723.181	BOTH	2.85782
NC_002754	2353036	2354019	-	SSO2585	376.323	722.815	BOTH	1.92073
NC_002754	2012683	2013399	-	SSO2190	244.918	721.002	BOTH	2.94385
NC_002754	1246615	1247103	+	SSO1398	414.578	720.672	BOTH	1.73833
NC_002754	2760407	2761441	-	SSO3014	626.678	719.811	BOTH	1.14861
NC_002754	174323	175930	-	SSO0201	466	718.689	BOTH	1.54225
NC_002754	769622	770602	+	SSO0905	712.595	711.982	BOTH	1.00086
NC_002754	942230	942550	+	SSO1086	329.635	709.129	BOTH	2.15126
NC_002754	603389	603844	-	SSO0700	355.93	700.473	BOTH	1.96801
NC_002754	196577	196831	-	SSO5468	94.8463	699.271	BOTH	7.37267
NC_002754	1962697	1963968	-	SSO2134	696.388	696.298	BOTH	1.00013
NC_002754	2324504	2326336	+	SSO2552	526.372	695.223	BOTH	1.32078
NC_002754	459610	460911	-	SSO0530	445.622	686.788	BOTH	1.54119
NC_002754	1849776	1850858	+	SSO2036	141.57	686.503	BOTH	4.8492
NC_002754	2143909	2144421	-	SSO2349	147.331	684.665	BOTH	4.64713
NC_002754	2945488	2946087	-	SSO3201	187.584	682.569	BOTH	3.63874
NC_002754	206480	207904	-	SSO0240	116.201	679.153	BOTH	5.84464
NC_002754	957883	958260	+	SSO1108	420.464	674.841	BOTH	1.60499
NC_002754	143942	145231	+	SSO0173	236.568	669.531	BOTH	2.83018
NC_002754	946071	947213	+	SSO1091	386.773	664.263	BOTH	1.71745
NC_002754	1121211	1121786	-	SSO1292	389.3	662.976	BOTH	1.70299
NC_002754	418707	419693	+	SSO0486	1100.51	654.534	BOTH	1.68136
NC_002754	2400659	2400844	-	SSO10802	184.83	649.655	BOTH	3.51488
NC_002754	2205820	2206350	+	SSO2427	344.698	649.602	BOTH	1.88455
NC_002754	2290030	2290965	-	SSO2521	314.504	647.19	BOTH	2.05781
NC_002754	2209361	2209930	+	SSO2432	443.558	645.321	BOTH	1.45488
NC_002754	55477	56172	-	SSO0067	417.493	643.179	BOTH	1.54057
NC_002754	606655	607014	-	SSO0707	360.867	640.761	BOTH	1.77561
NC_002754	358711	359355	+	SSO0411	232.618	637.307	BOTH	2.73972
NC_002754	2196594	2197565	+	SSO2416	260.733	632.542	BOTH	2.42601
NC_002754	188153	188605	-	SSO0219	510.64	626.783	BOTH	1.22745
NC_002754	25702	26757	-	SSO0028	204.493	625.128	BOTH	3.05697
NC_002754	185592	186899	-	SSO0216	801.901	618.278	BOTH	1.29699
NC_002754	2985474	2985797	-	SSO3242	184.219	616.958	BOTH	3.34904
NC_002754	199416	199601	-	SSO5478	271.208	616.93	BOTH	2.27475
NC_002754	2161170	2162300	+	SSO2368	156.717	615.598	BOTH	3.92807
NC_002754	623934	624209	-	SSO12356	506.688	613.486	BOTH	1.21078
NC_002754	2822074	2823936	+	SSO3066	1465.04	612.67	BOTH	2.39124
NC_002754	255258	256103	+	SSO0297	309.061	611.553	BOTH	1.97874
NC_002754	2467764	2469173	+	SSO2716	355.436	609.754	BOTH	1.71551
NC_002754	325069	326844	-	SSO0382	285.689	607.67	BOTH	2.12703
NC_002754	357792	358250	+	SSO0408	361.131	601.562	BOTH	1.66577
NC_002754	2740216	2741835	-	SSO3000	994.625	601.288	BOTH	1.65416
NC_002754	58779	59324	-	SSO0073	392.181	600.719	BOTH	1.53174
NC_002754	2907619	2908212	+	SSO3155	1019.38	596.658	BOTH	1.70848
NC_002754	2608309	2609169	+	SSO2848	669.554	595.355	BOTH	1.12463
NC_002754	563750	564202	-	SSO0652	533.903	593.65	BOTH	1.11191
NC_002754	815475	815990	-	SSO0960	188.324	591.41	BOTH	3.14039
NC_002754	641071	641976	-	SSO0757	682.824	588.382	BOTH	1.16051
NC_002754	859806	860780	+	SSO1003	164.517	588.031	BOTH	3.57429
NC_002754	250595	251596	-	SSO0293	244.134	587.717	BOTH	2.40736
NC_002754	391248	392390	+	SSO0452	276.515	584.324	BOTH	2.11317
NC_002754	2400401	2400892	+	SSO2637	168.893	582.16	BOTH	3.44691
NC_002754	2521316	2523199	+	SSO2764	251.614	581.353	BOTH	2.31049
NC_002754	783434	783847	+	SSO0920	239.521	578.568	BOTH	2.41552
NC_002754	2189569	2189883	-	SSO2405	194.419	578.373	BOTH	2.97488
NC_002754	2093422	2094543	+	SSO2284	183.765	577.136	BOTH	3.14063
NC_002754	105256	106164	-	SSO0125	1512.61	576.32	BOTH	2.6246
NC_002754	1635126	1635656	-	SSO1805	139.734	574.833	BOTH	4.11378
NC_002754	358247	358633	-	SSO0410	181.237	573.358	BOTH	3.16358
NC_002754	1799863	1800333	+	SSO1988	1108.24	573.166	BOTH	1.93354
NC_002754	2813690	2814661	+	SSO3059	219.944	569.921	BOTH	2.59121
NC_002754	906384	907376	+	SSO1048	158.49	569.222	BOTH	3.59154
NC_002754	766078	767073	+	SSO0898	792.231	568.549	BOTH	1.39343
NC_002754	973251	973862	+	SSO1133	611.702	566.564	BOTH	1.07967
NC_002754	12647	13030	-	SSO0014	1862.97	565.229	BOTH	3.29596
NC_002754	736262	736633	+	SSO0860	2379.57	556.316	BOTH	4.27738
NC_002754	957454	957804	+	SSO1107	243.384	555.311	BOTH	2.28163
NC_002754	809864	810391	-	SSO0955	112.389	555.175	BOTH	4.93974
NC_002754	2957760	2959016	+	SSO3211	163.548	554.661	BOTH	3.39144
NC_002754	2575303	2577201	+	SSO2815	809.605	553.559	BOTH	1.46254
NC_002754	892443	894620	+	SSO1033	465.203	552.928	BOTH	1.18857
NC_002754	355785	356777	+	SSO0406	187.63	549.719	BOTH	2.92979
NC_002754	236451	237041	-	SSO0278	308.826	547.255	BOTH	1.77205
NC_002754	1109513	1110514	-	SSO1284	219.048	546.714	BOTH	2.49586
NC_002754	199626	199922	+	SSO5479	264.369	546.587	BOTH	2.06752
NC_002754	220198	220551	+	SSO0255	641.246	544.548	BOTH	1.17757
NC_002754	359364	360611	+	SSO0412	334.022	544.528	BOTH	1.63022
NC_002754	1106938	1107909	-	SSO1282	425.758	544.303	BOTH	1.27843
NC_002754	602147	602800	-	SSO0698	371.134	541.601	BOTH	1.45931
NC_002754	180731	181381	+	SSO0209	232.199	540.91	BOTH	2.32951
NC_002754	498258	499649	+	SSO0564	671.476	537.241	BOTH	1.24986
NC_002754	215580	216095	-	SSO0249	131.91	533.1	BOTH	4.04138
NC_002754	348688	349437	+	SSO0397	199.821	531.945	BOTH	2.66211
NC_002754	1863429	1866056	+	SSO2045	435.373	531.364	BOTH	1.22048
NC_002754	566686	567546	-	SSO0656	201.849	531.329	BOTH	2.63231
NC_002754	2281312	2283303	-	SSO2514	773.455	529.486	BOTH	1.46076
NC_002754	1107906	1109516	-	SSO1283	267.98	529.297	BOTH	1.97513
NC_002754	2166139	2166465	-	SSO2375	245.662	528.804	BOTH	2.15257
NC_002754	59335	59832	-	SSO0074	332.85	527.785	BOTH	1.58566
NC_002754	2096394	2096783	+	SSO2286	215.945	527.27	BOTH	2.44169
NC_002754	2395541	2396674	+	SSO2632	604.188	526.32	BOTH	1.14795
NC_002754	489285	489770	-	SSO0554	350.132	522.599	BOTH	1.49258
NC_002754	2397949	2399346	+	SSO2635	202.908	521.923	BOTH	2.57222
NC_002754	1989946	1990365	-	SSO2163	136.971	518.922	BOTH	3.78856
NC_002754	56376	56798	-	SSO0068	400.238	517.53	BOTH	1.29306
NC_002754	828181	829350	+	SSO0969	142.634	514.737	BOTH	3.60879
NC_002754	2030357	2030998	+	SSO2206	117.189	514.232	BOTH	4.38807
NC_002754	1968238	1968660	+	SSO2140	163.567	513.116	BOTH	3.13704
NC_002754	406229	406510	+	SSO5909	159.585	510.417	BOTH	3.19841
NC_002754	2280182	2281294	+	SSO2511	418.153	504.805	BOTH	1.20723
NC_002754	2053505	2054482	+	SSO2237	185.562	495.347	BOTH	2.66944
NC_002754	2200206	2201762	-	SSO2422	132.257	494.835	BOTH	3.74145
NC_002754	2054954	2056717	-	SSO2241	397.857	492.407	BOTH	1.23765
NC_002754	959104	959568	-	SSO1111	359.629	492.354	BOTH	1.36906
NC_002754	2139054	2139866	+	SSO2343	114.427	491.32	BOTH	4.29375
NC_002754	629682	630131	-	SSO0741	1183.18	488.169	BOTH	2.42372
NC_002754	782382	783422	+	SSO0919	350.573	487.827	BOTH	1.39151
NC_002754	283168	284619	+	SSO0329	234.624	484.459	BOTH	2.06483
NC_002754	803980	804876	+	SSO0947	140.111	484.404	BOTH	3.45728
NC_002754	858177	859004	+	SSO1000	204.678	483.588	BOTH	2.36268
NC_002754	770599	771720	+	SSO0906	760.849	478.625	BOTH	1.58966
NC_002754	878058	878894	+	SSO1019	121.775	476.405	BOTH	3.91217
NC_002754	5351	6334	-	SSO0009	156.165	476.371	BOTH	3.05043
NC_002754	499646	500287	+	SSO0566	897.146	475.662	BOTH	1.8861
NC_002754	2514006	2514560	-	SSO2758	336.796	474.826	BOTH	1.40983
NC_002754	1100189	1101541	+	SSO1275	164.456	473.642	BOTH	2.88005
NC_002754	2572959	2573759	-	SSO2812	143.855	470.961	BOTH	3.27385
NC_002754	1449666	1450007	+	SSO1602	124.515	469.005	BOTH	3.76664
NC_002754	1899747	1900520	-	SSO2087	179.117	467.194	BOTH	2.60832
NC_002754	2160251	2161186	+	SSO2367	144.701	465.773	BOTH	3.21885
NC_002754	2275200	2275796	+	SSO2506	292.556	465.056	BOTH	1.58963
NC_002754	56169	56369	-	SSO5140	340.784	463.526	BOTH	1.36017
NC_002754	370522	370854	-	SSO0425	611.13	460.909	BOTH	1.32592
NC_002754	1823352	1825286	+	SSO2008	147.713	460.116	BOTH	3.11494
NC_002754	974538	975455	+	SSO1135	275.882	458.405	BOTH	1.6616
NC_002754	602793	603383	-	SSO0699	295.234	458.074	BOTH	1.55156
NC_002754	2190033	2190209	+	SSO10342	1052.15	453.302	BOTH	2.32108
NC_002754	272169	272882	+	SSO0318	512.702	453.077	BOTH	1.1316
NC_002754	605217	605381	-	SSO6391	516.173	452.314	BOTH	1.14118
NC_002754	188611	188985	-	SSO0220	231.493	451.71	BOTH	1.95129
NC_002754	608266	608955	-	SSO0712	284.797	448.286	BOTH	1.57406
NC_002754	2208915	2209334	-	SSO2431	160.21	446.46	BOTH	2.78671
NC_002754	1575540	1576487	-	SSO1739	185.968	444.993	BOTH	2.39285
NC_002754	1650236	1651222	-	SSO1818	200.848	442.476	BOTH	2.20304
NC_002754	2933310	2933801	-	SSO3186	273.881	439.327	BOTH	1.60408
NC_002754	607020	607436	-	SSO0708	300.355	436.071	BOTH	1.45185
NC_002754	395505	396395	-	SSO0460	323.505	434.956	BOTH	1.34451
NC_002754	680593	681300	-	SSO0796	345.145	434.642	BOTH	1.2593
NC_002754	369637	370518	+	SSO0422	477.918	433.434	BOTH	1.10263
NC_002754	2201886	2203055	+	SSO2423	99.6668	433.036	BOTH	4.34484
NC_002754	379208	379837	+	SSO0437	272.844	429.168	BOTH	1.57294
NC_002754	70054	71214	+	SSO0087	186.371	428.767	BOTH	2.30061
NC_002754	2962883	2963272	-	SSO3215	57.8067	428.13	BOTH	7.40622
NC_002754	989495	989941	-	SSO1149	151.113	426.611	BOTH	2.82313
NC_002754	161092	162078	-	SSO0188	82.7022	426.498	BOTH	5.15704
NC_002754	609437	609859	-	SSO0715	352.046	425.471	BOTH	1.20857
NC_002754	636769	637074	-	SSO0752	169.086	425.177	BOTH	2.51456
NC_002754	2169430	2169765	+	SSO2382	110.029	424.681	BOTH	3.85972
NC_002754	1634878	1635063	+	SSO8958	148.607	423.93	BOTH	2.85269
NC_002754	193195	195144	-	SSO0227	178.647	422.632	BOTH	2.36573
NC_002754	2513756	2514040	-	SSO11071	399.157	422.044	BOTH	1.05734
NC_002754	2580109	2581296	+	SSO2819	234.922	421.759	BOTH	1.79532
NC_002754	2169053	2169472	+	SSO2381	99.5402	421.263	BOTH	4.23209
NC_002754	309522	310148	+	SSO0364	281.038	420.632	BOTH	1.49671
NC_002754	1432890	1433741	-	SSO1586	1045.46	420.201	BOTH	2.48799
NC_002754	2733830	2734393	+	SSO2991	160.044	418.439	BOTH	2.61453
NC_002754	488848	489288	-	SSO0553	244.443	415.633	BOTH	1.70032
NC_002754	2027648	2029624	+	SSO2204	64.27	414.446	BOTH	6.44851
NC_002754	251593	252129	-	SSO0294	276.345	414.104	BOTH	1.4985
NC_002754	2976437	2977540	-	SSO3232	161.88	413.564	BOTH	2.55476
NC_002754	1096402	1099122	+	SSO1273	76.41	413.15	BOTH	5.40702
NC_002754	811637	813073	-	SSO0957	103.629	412.166	BOTH	3.9773
NC_002754	1752576	1753430	-	SSO1933	483.514	411.608	BOTH	1.1747
NC_002754	93241	94617	-	SSO0114	124.078	408.727	BOTH	3.29411
NC_002754	2058349	2059272	+	SSO2243	327.843	404.9	BOTH	1.23504
NC_002754	2308155	2308748	-	SSO2539	98.4475	404.06	BOTH	4.10432
NC_002754	164888	165574	-	SSO0191	181.18	402.42	BOTH	2.22111
NC_002754	2621884	2622237	-	SSO2867	351.124	402.11	BOTH	1.14521
NC_002754	564264	565319	+	SSO0653	121.223	400.465	BOTH	3.30352
NC_002754	2212210	2212797	-	SSO2436	105.475	400.301	BOTH	3.79523
NC_002754	195129	196571	-	SSO3254	114.751	398.708	BOTH	3.47454
NC_002754	604809	605210	-	SSO0703	340.784	398.66	BOTH	1.16983
NC_002754	1866840	1868258	-	SSO2047	77.6122	395.118	BOTH	5.09092
NC_002754	279779	283225	+	SSO0328	243.021	395.08	BOTH	1.6257
NC_002754	385258	385404	-	SSO5865	148.664	394.773	BOTH	2.65547
NC_002754	597866	598435	-	SSO0692	290.048	394.619	BOTH	1.36053
NC_002754	2011770	2012114	+	SSO2187	134.449	394.556	BOTH	2.93461
NC_002754	516107	518941	+	SSO0589	290.668	394.341	BOTH	1.35667
NC_002754	2110381	2111379	-	SSO2308	234.405	393.473	BOTH	1.6786
NC_002754	2423999	2425000	-	SSO2668	123.705	392.985	BOTH	3.1768
NC_002754	459207	459617	+	SSO0529	596.028	392.286	BOTH	1.51937
NC_002754	299322	299591	-	SSO5668	354.149	388.619	BOTH	1.09733
NC_002754	2156037	2157185	-	SSO2363	194.031	388.217	BOTH	2.0008
NC_002754	329319	330797	-	SSO0386	96.832	388.021	BOTH	4.00716
NC_002754	852826	853197	-	SSO0995	309.056	387.673	BOTH	1.25438
NC_002754	526402	527775	+	SSO0602	223.866	387.419	BOTH	1.73059
NC_002754	607438	607782	-	SSO0709	269.649	386.737	BOTH	1.43422
NC_002754	2400889	2403138	+	SSO2639	189.609	386.693	BOTH	2.03942
NC_002754	1731693	1731971	-	SSO9221	142.725	385.504	BOTH	2.70103
NC_002754	2379966	2380937	-	SSO2615	183.42	383.98	BOTH	2.09345
NC_002754	2138337	2138969	-	SSO2342	219.424	383.864	BOTH	1.74941
NC_002754	1728311	1728613	-	SSO1908	140.257	378.481	BOTH	2.69848
NC_002754	605387	605935	-	SSO0704	288.87	374.815	BOTH	1.29752
NC_002754	2341282	2342274	+	SSO2569	162.752	373.7	BOTH	2.29613
NC_002754	1295499	1295951	-	SSO1443	144.535	373.016	BOTH	2.5808
NC_002754	2140629	2141474	+	SSO2345	277.818	372.982	BOTH	1.34254
NC_002754	178048	179415	-	SSO0207	214.619	372.939	BOTH	1.73768
NC_002754	1248041	1248832	+	SSO1400	172.319	372.736	BOTH	2.16305
NC_002754	2108586	2109635	-	SSO2305	151.367	372.122	BOTH	2.45841
NC_002754	1876867	1878735	-	SSO2059	155.332	371.669	BOTH	2.39274
NC_002754	2959013	2959447	-	SSO3212	182.486	371.597	BOTH	2.03631
NC_002754	624928	625755	-	SSO0732	260.698	370.063	BOTH	1.41951
NC_002754	90305	90655	+	SSO0111	330.746	369.485	BOTH	1.11713
NC_002754	67859	68911	-	SSO0084	173.084	367.974	BOTH	2.12599
NC_002754	2987926	2988291	-	SSO3246	485.698	367.571	BOTH	1.32137
NC_002754	1983028	1983879	+	SSO2156	112.433	367.27	BOTH	3.26656
NC_002754	664160	664516	-	SSO0781	222.356	366.569	BOTH	1.64856
NC_002754	603841	604257	-	SSO0701	254.162	365.079	BOTH	1.4364
NC_002754	810524	811621	-	SSO0956	128.151	364.484	BOTH	2.84418
NC_002754	2624431	2624895	+	SSO2870	385.635	364.431	BOTH	1.05818
NC_002754	1974673	1975056	+	SSO2148	115.845	361.509	BOTH	3.12062
NC_002754	380199	380588	-	SSO0438	196.233	359.139	BOTH	1.83017
NC_002754	985130	985957	-	SSO1144	100.461	355.361	BOTH	3.5373
NC_002754	504260	505792	+	SSO0572	215.804	354.501	BOTH	1.6427
NC_002754	1279842	1280669	+	SSO1427	117.883	354.275	BOTH	3.00531
NC_002754	1728731	1730149	-	SSO1909	49.5501	354.271	BOTH	7.14975
NC_002754	608957	609430	-	SSO0713	302.14	352.404	BOTH	1.16636
NC_002754	2357820	2358191	+	SSO2590	489.01	351.788	BOTH	1.39007
NC_002754	1589036	1589734	-	SSO1755	391.604	350.983	BOTH	1.11573
NC_002754	377758	378120	-	SSO0435	226.058	350.983	BOTH	1.55262
NC_002754	2096761	2097717	+	SSO2287	162.647	350.247	BOTH	2.15342
NC_002754	660623	660952	-	SSO0775	367.76	349.82	BOTH	1.05128
NC_002754	2923351	2923839	+	SSO3177	549.356	346.687	BOTH	1.58459
NC_002754	775198	775977	-	SSO0910	538.865	345.483	BOTH	1.55974
NC_002754	250020	250589	-	SSO0292	203.064	345.474	BOTH	1.70131
NC_002754	745122	745781	-	SSO0873	471.283	345.314	BOTH	1.3648
NC_002754	2433256	2435610	+	SSO2675	224.582	345.25	BOTH	1.5373
NC_002754	2479293	2480882	-	SSO2726	460.573	343.924	BOTH	1.33917
NC_002754	1346285	1347400	-	SSO1491	111.765	342.987	BOTH	3.06882
NC_002754	904866	905645	+	SSO1046	76.1897	341.759	BOTH	4.48563
NC_002754	104246	105148	+	SSO0124	281.422	337.412	BOTH	1.19896
NC_002754	2420009	2420575	-	SSO2663	167.271	336.933	BOTH	2.01429
NC_002754	2512557	2513759	-	SSO2757	273.279	336.006	BOTH	1.22954
NC_002754	2174074	2174925	+	SSO2387	110.304	335.609	BOTH	3.04258
NC_002754	146792	146989	+	SSO5343	310.611	335.009	BOTH	1.07855
NC_002754	495893	496477	+	SSO0561	320.853	333.778	BOTH	1.04028
NC_002754	917747	918091	+	SSO1057	432.891	333.207	BOTH	1.29916
NC_002754	88218	88610	-	SSO0108	775.423	332.99	BOTH	2.32867
NC_002754	132570	133430	+	SSO0159	69.022	332.904	BOTH	4.82316
NC_002754	2083299	2084168	+	SSO2274	140.389	332.402	BOTH	2.36772
NC_002754	373055	374035	+	SSO0429	176.982	332.371	BOTH	1.87799
NC_002754	2300632	2301045	+	SSO2532	175.885	331.303	BOTH	1.88363
NC_002754	807634	808389	-	SSO0952	92.0907	330.376	BOTH	3.58751
NC_002754	2990014	2990940	-	SSO3251	367.875	329.199	BOTH	1.11748
NC_002754	620585	622795	-	SSO0728	231.279	329.007	BOTH	1.42256
NC_002754	590460	591716	-	SSO0686	153.446	328.56	BOTH	2.14121
NC_002754	1231762	1232895	-	SSO1389	146.172	326.198	BOTH	2.2316
NC_002754	2622248	2623072	-	SSO2868	395.663	325.213	BOTH	1.21663
NC_002754	2139827	2140612	+	SSO2344	122.753	325.07	BOTH	2.64816
NC_002754	348369	348683	+	SSO0396	147.528	322.782	BOTH	2.18794
NC_002754	1279025	1279870	+	SSO1426	103.02	322.455	BOTH	3.13001
NC_002754	1964891	1965910	-	SSO2137	254.053	322.172	BOTH	1.26813
NC_002754	2581577	2582515	-	SSO2820	193.637	320.941	BOTH	1.65743
NC_002754	2409368	2411635	-	SSO2651	121.759	319.976	BOTH	2.62794
NC_002754	860974	862209	+	SSO1004	164.509	318.529	BOTH	1.93624
NC_002754	2933794	2934696	-	SSO3187	113.257	318.11	BOTH	2.80873
NC_002754	1986907	1989909	-	SSO2162	163.724	316.84	BOTH	1.93521
NC_002754	465344	466165	+	SSO0537	69.8799	316.808	BOTH	4.5336
NC_002754	2094540	2096369	+	SSO2285	162.371	316.546	BOTH	1.94951
NC_002754	2945105	2945491	-	SSO3200	115.617	316.527	BOTH	2.73772
NC_002754	2971123	2972241	-	SSO3225	328.22	315.797	BOTH	1.03934
NC_002754	2946137	2947924	-	SSO3202	78.5034	314.736	BOTH	4.0092
NC_002754	2406310	2406882	+	SSO2645	233.356	314.694	BOTH	1.34856
NC_002754	908305	909105	+	SSO1050	188.284	313.974	BOTH	1.66755
NC_002754	419671	420330	+	SSO0487	443.014	313.455	BOTH	1.41333
NC_002754	633223	633849	-	SSO0746	148.785	312.743	BOTH	2.10198
NC_002754	298872	299315	-	SSO0349	294.541	312.656	BOTH	1.0615
NC_002754	2154682	2156040	-	SSO2360	208.286	311.941	BOTH	1.49766
NC_002754	1709631	1710356	-	SSO1894	428.201	311.254	BOTH	1.37573
NC_002754	189372	190559	-	SSO0223	177.482	310.672	BOTH	1.75044
NC_002754	1827013	1827495	+	SSO2012	168.642	309.75	BOTH	1.83673
NC_002754	786061	786549	+	SSO0925	236.7	309.345	BOTH	1.30691
NC_002754	61275	61688	+	SSO0077	779.07	308.915	BOTH	2.52195
NC_002754	741301	742371	-	SSO0869	62.6663	308.768	BOTH	4.92717
NC_002754	384378	385271	+	SSO0445	113.335	307.773	BOTH	2.71561
NC_002754	2510372	2511685	+	SSO2755	261.763	307.569	BOTH	1.17499
NC_002754	2435615	2436109	-	SSO2677	500.119	307.551	BOTH	1.62613
NC_002754	820609	820878	-	SSO6877	409.175	307.411	BOTH	1.33103
NC_002754	90572	93199	-	SSO0112	120.232	306.99	BOTH	2.55331
NC_002754	434783	435706	+	SSO0503	186.965	306.463	BOTH	1.63915
NC_002754	594271	595011	-	SSO0688	88.9424	305.793	BOTH	3.43811
NC_002754	2578274	2580106	+	SSO2817	212.34	305.009	BOTH	1.43642
NC_002754	1112517	1113728	+	SSO1287	637.928	304.805	BOTH	2.0929
NC_002754	649487	650488	-	SSO0764	63.2748	304.42	BOTH	4.81108
NC_002754	2084832	2085617	+	SSO2276	221.769	304.214	BOTH	1.37176
NC_002754	2350288	2351055	-	SSO2581	62.7589	302.878	BOTH	4.82606
NC_002754	604254	604799	-	SSO0702	250.116	301.246	BOTH	1.20443
NC_002754	306624	307280	+	SSO0361	213.775	300.042	BOTH	1.40354
NC_002754	813066	813359	-	SSO6855	87.5531	299.256	BOTH	3.41799
NC_002754	1287313	1288251	-	SSO1435	105.88	297.443	BOTH	2.80925
NC_002754	1980262	1982619	+	SSO2154	211.585	296.324	BOTH	1.40049
NC_002754	1900584	1902404	-	SSO2088	151.979	296.232	BOTH	1.94916
NC_002754	2277771	2278145	+	SSO2509	61.0404	296.037	BOTH	4.84986
NC_002754	1965885	1966292	-	SSO2138	215.733	294.81	BOTH	1.36655
NC_002754	2211482	2212210	-	SSO2435	88.6291	294.792	BOTH	3.32613
NC_002754	1848518	1849708	-	SSO2035	269.36	294.79	BOTH	1.09441
NC_002754	76025	76711	-	SSO0094	57.711	293.484	BOTH	5.08541
NC_002754	779052	779477	+	SSO0916	140.516	293.394	BOTH	2.08797
NC_002754	323985	325076	-	SSO0381	228.996	293.139	BOTH	1.2801
NC_002754	735325	735717	+	SSO0858	1069.5	293.038	BOTH	3.6497
NC_002754	1975089	1977278	+	SSO2150	101.642	292.746	BOTH	2.88017
NC_002754	1682173	1682562	-	SSO1866	308.967	291.213	BOTH	1.06096
NC_002754	2046576	2047151	-	SSO2227	198.699	290.96	BOTH	1.46433
NC_002754	185259	185567	-	SSO0215	327.341	290.549	BOTH	1.12663
NC_002754	311070	312485	-	SSO0366	222.96	289.761	BOTH	1.29961
NC_002754	793122	794162	-	SSO0934	385.34	289.361	BOTH	1.33169
NC_002754	2360494	2361018	+	SSO2595	291.052	289.055	BOTH	1.00691
NC_002754	169763	170626	+	SSO0197	84.6783	288.919	BOTH	3.41196
NC_002754	256072	257013	+	SSO0299	181.467	286.656	BOTH	1.57966
NC_002754	231686	232867	+	SSO0271	82.9432	285.858	BOTH	3.44643
NC_002754	162109	163914	-	SSO0189	71.0728	285.096	BOTH	4.01132
NC_002754	2511689	2512588	-	SSO2756	266.812	284.509	BOTH	1.06633
NC_002754	1951498	1953090	+	SSO2126	110.182	284.095	BOTH	2.57842
NC_002754	198996	199412	-	SSO0230	269.283	283.637	BOTH	1.0533
NC_002754	2203048	2203587	+	SSO2424	125.408	282.947	BOTH	2.25621
NC_002754	237076	238356	-	SSO0279	50.5051	282.286	BOTH	5.58925
NC_002754	626461	627210	-	SSO0736	233.681	281.466	BOTH	1.20449
NC_002754	1611934	1613340	+	SSO1780	76.3096	280.603	BOTH	3.67716
NC_002754	605928	606647	-	SSO0705	206.707	279.937	BOTH	1.35427
NC_002754	2726051	2727280	-	SSO2983	80.9705	279.088	BOTH	3.44679
NC_002754	4500	5348	+	SSO0008	469.025	278.544	BOTH	1.68384
NC_002754	783840	784595	+	SSO0921	161.559	277.219	BOTH	1.71591
NC_002754	2000418	2001149	+	SSO2177	122.251	276.387	BOTH	2.26082
NC_002754	2355342	2356199	+	SSO2587	100.472	275.864	BOTH	2.74568
NC_002754	2703907	2704938	-	SSO2960	74.3251	275.196	BOTH	3.70259
NC_002754	2354060	2355367	+	SSO2586	48.7361	273.868	BOTH	5.6194
NC_002754	2718875	2719477	+	SSO2975	288.642	273.459	BOTH	1.05553
NC_002754	272869	274047	-	SSO0320	161.034	273.444	BOTH	1.69805
NC_002754	699834	700166	+	SSO0816	791.667	273.139	BOTH	2.8984
NC_002754	2142903	2143901	-	SSO2348	102.633	272.239	BOTH	2.65255
NC_002754	365906	369634	+	SSO0420	75.8615	270.698	BOTH	3.56831
NC_002754	449346	449660	-	SSO0521	153.286	270.083	BOTH	1.76195
NC_002754	577862	578560	-	SSO0673	131.235	269.348	BOTH	2.05241
NC_002754	2514624	2515853	-	SSO2759	455.204	269.079	BOTH	1.69171
NC_002754	846234	847502	+	SSO0989	86.5821	269.04	BOTH	3.10734
NC_002754	1968668	1970377	-	SSO2141	148.055	268.945	BOTH	1.81652
NC_002754	458188	459210	+	SSO0528	232.621	268.422	BOTH	1.1539
NC_002754	1660009	1660527	+	SSO1831	224.017	267.741	BOTH	1.19518
NC_002754	2158360	2160012	+	SSO2365	98.083	267.465	BOTH	2.72692
NC_002754	2079512	2080072	+	SSO2268	50.1946	265.697	BOTH	5.29334
NC_002754	47249	47788	+	SSO0054	812.752	264.63	BOTH	3.07128
NC_002754	2084231	2084881	+	SSO2275	143.698	264.452	BOTH	1.84033
NC_002754	2012181	2012690	-	SSO2188	183.934	262.972	BOTH	1.42971
NC_002754	398312	398935	-	SSO0465	113.925	262.482	BOTH	2.304
NC_002754	1776732	1777148	+	SSO1961	239.662	262.074	BOTH	1.09351
NC_002754	197205	199007	+	SSO0228	105.493	261.939	BOTH	2.483
NC_002754	199932	200582	+	SSO0231	186.555	261.796	BOTH	1.40332
NC_002754	961609	962664	+	SSO1115	96.1117	261.605	BOTH	2.72189
NC_002754	243065	243316	-	SSO5559	222.8	261.3	BOTH	1.1728
NC_002754	76708	77907	-	SSO0095	55.4258	261.05	BOTH	4.7099
NC_002754	1450055	1450573	+	SSO1603	85.0464	260.545	BOTH	3.06356
NC_002754	1101531	1102481	+	SSO1276	85.7421	260.524	BOTH	3.03846
NC_002754	126291	126647	-	SSO0150	94.8463	260.396	BOTH	2.74545
NC_002754	2306712	2308109	-	SSO2538	83.7828	260.046	BOTH	3.10381
NC_002754	52207	53313	-	SSO0063	171.429	259.113	BOTH	1.51149
NC_002754	86950	87813	-	SSO0106	143.463	258.738	BOTH	1.80351
NC_002754	802115	802492	-	SSO0944	289.983	258.372	BOTH	1.12235
NC_002754	696609	697838	+	SSO0810	222.265	257.551	BOTH	1.15876
NC_002754	219233	220078	+	SSO0254	229.83	257.13	BOTH	1.11878
NC_002754	127806	129608	+	SSO0152	161.018	256.76	BOTH	1.5946
NC_002754	291654	294356	-	SSO0341	204.936	256.557	BOTH	1.25189
NC_002754	1404715	1405452	+	SSO1556	81.6961	256.239	BOTH	3.13649
NC_002754	2609154	2610017	+	SSO2849	417.393	256.016	BOTH	1.63034
NC_002754	1664860	1665348	+	SSO1838	229.634	255.029	BOTH	1.11059
NC_002754	976832	978007	+	SSO1138	108.707	255.026	BOTH	2.346
NC_002754	496480	498258	+	SSO0563	328.42	255.014	BOTH	1.28785
NC_002754	2345762	2347282	+	SSO2575	111.309	254.979	BOTH	2.29073
NC_002754	1294537	1295502	-	SSO1442	181.787	254.044	BOTH	1.39748
NC_002754	664567	664836	+	SSO6503	583.53	253.871	BOTH	2.29853
NC_002754	1731193	1731696	+	SSO1911	109.515	253.752	BOTH	2.31705
NC_002754	2952434	2952814	+	SSO3206	120.158	252.888	BOTH	2.10463
NC_002754	490144	490731	+	SSO0556	130.889	252.791	BOTH	1.93134
NC_002754	214339	215556	-	SSO0248	84.3922	252.649	BOTH	2.99375
NC_002754	1986061	1986828	-	SSO2161	77.6051	252.624	BOTH	3.25525
NC_002754	635111	635695	-	SSO0749	458.024	252.432	BOTH	1.81444
NC_002754	1415376	1415939	+	SSO1568	112.72	252.388	BOTH	2.23907
NC_002754	697868	698608	+	SSO0813	129.509	251.748	BOTH	1.94387
NC_002754	216135	217109	-	SSO0250	213.774	250.919	BOTH	1.17376
NC_002754	179604	180845	-	SSO0210	67.6696	250.496	BOTH	3.70175
NC_002754	1081711	1083105	+	SSO1256	237.524	249.4	BOTH	1.05
NC_002754	767033	767422	+	SSO0900	398.224	249.181	BOTH	1.59813
NC_002754	796129	797463	-	SSO0938	104.689	248.951	BOTH	2.37802
NC_002754	2030995	2031663	+	SSO2207	106.132	248.652	BOTH	2.34284
NC_002754	2193240	2193617	-	SSO2410	149.676	248.491	BOTH	1.66019
NC_002754	41790	42533	-	SSO0046	388.12	248.408	BOTH	1.56243
NC_002754	2333935	2334618	+	SSO2560	248.905	248.154	BOTH	1.00303
NC_002754	353640	354944	-	SSO0404	188.046	247.413	BOTH	1.31571
NC_002754	1	252	+	SSO12256	65.1262	247.302	BOTH	3.79727
NC_002754	2405747	2406313	+	SSO2644	199.263	246.417	BOTH	1.23664
NC_002754	2016255	2016629	-	SSO2193	58.2763	246.237	BOTH	4.22533
NC_002754	249129	249473	-	SSO0291	192.785	245.595	BOTH	1.27393
NC_002754	2623145	2624443	+	SSO2869	230.274	245.095	BOTH	1.06436
NC_002754	294927	295943	-	SSO0344	364.197	244.161	BOTH	1.49163
NC_002754	1528090	1529271	+	SSO1675	128.178	244.076	BOTH	1.90419
NC_002754	231116	231613	-	SSO0270	108.753	243.753	BOTH	2.24135
NC_002754	362362	363606	-	SSO0417	175.184	243.67	BOTH	1.39094
NC_002754	1506159	1508567	+	SSO1653	88.3141	243.623	BOTH	2.75859
NC_002754	739093	739923	-	SSO0865	303.102	242.211	BOTH	1.25139
NC_002754	2391484	2391870	+	SSO2626	41.2917	240.746	BOTH	5.83037
NC_002754	2051220	2052134	+	SSO2233	38.1384	240.537	BOTH	6.30694
NC_002754	1106211	1106948	-	SSO1281	337.552	239.275	BOTH	1.41073
NC_002754	1330173	1331039	-	SSO1469	333.257	238.856	BOTH	1.39522
NC_002754	301042	301506	-	SSO0353	353.128	238.74	BOTH	1.47913
NC_002754	525978	526376	+	SSO0601	172.972	238.186	BOTH	1.37702
NC_002754	567579	568523	-	SSO0657	80.2537	238.097	BOTH	2.96681
NC_002754	89415	90317	+	SSO0110	197.148	237.069	BOTH	1.20249
NC_002754	735135	735338	+	SSO6687	381.502	236.323	BOTH	1.61433
NC_002754	684470	685837	+	SSO0801	230.594	236.019	BOTH	1.02353
NC_002754	2704945	2706603	-	SSO2962	53.7844	235.937	BOTH	4.38672
NC_002754	243318	243557	-	SSO5561	108.692	235.458	BOTH	2.16628
NC_002754	2535036	2535455	-	SSO2778	231.781	233.852	BOTH	1.00894
NC_002754	284612	285646	+	SSO0330	145.465	232.964	BOTH	1.60151
NC_002754	389485	390195	-	SSO0450	139.468	232.31	BOTH	1.66568
NC_002754	598477	598743	-	SSO6374	278.221	231.854	BOTH	1.19998
NC_002754	1985101	1985769	-	SSO2159	114.396	231.799	BOTH	2.02629
NC_002754	1266099	1266701	+	SSO1412	38.6767	231.476	BOTH	5.98491
NC_002754	1800334	1801737	+	SSO1989	417.185	230.953	BOTH	1.80637
NC_002754	2930867	2931259	-	SSO3183	139.347	230.911	BOTH	1.65708
NC_002754	2164305	2164847	+	SSO2372	145.236	230.686	BOTH	1.58836
NC_002754	1674961	1675590	-	SSO1857	148.351	229.68	BOTH	1.54823
NC_002754	531560	531859	-	SSO0609	225.158	228.945	BOTH	1.01682
NC_002754	2960332	2962644	-	SSO3214	63.2989	227.837	BOTH	3.59939
NC_002754	1424702	1427854	-	SSO1580	298.802	227.729	BOTH	1.3121
NC_002754	916860	917306	+	SSO1055	167.538	227.464	BOTH	1.35768
NC_002754	530647	531255	-	SSO0607	60.2801	225.107	BOTH	3.73435
NC_002754	374318	375382	+	SSO0430	114.927	224.584	BOTH	1.95414
NC_002754	2035195	2035965	+	SSO2212	48.6226	224.458	BOTH	4.61634
NC_002754	361016	361558	+	SSO0415	129.328	224.317	BOTH	1.73448
NC_002754	2351776	2352945	-	SSO2583	115.097	223.701	BOTH	1.94359
NC_002754	95902	96168	+	SSO5209	57.9088	223.564	BOTH	3.86063
NC_002754	651906	652583	+	SSO0766	118.993	223.315	BOTH	1.87672
NC_002754	2192668	2192886	-	SSO10348	211.409	223.294	BOTH	1.05622
NC_002754	629156	629716	-	SSO0740	826.825	223.284	BOTH	3.70302
NC_002754	267173	267997	+	SSO0314	170.976	223.265	BOTH	1.30583
NC_002754	2392154	2393173	+	SSO2627	41.6646	223.099	BOTH	5.35465
NC_002754	2412368	2413027	-	SSO2653	43.8433	222.489	BOTH	5.07464
NC_002754	2059246	2059656	-	SSO2244	151.319	221.976	BOTH	1.46694
NC_002754	268425	270347	-	SSO0315	62.1669	221.638	BOTH	3.56522
NC_002754	265543	267195	+	SSO0313	1160.22	221.562	BOTH	5.23655
NC_002754	624206	624718	-	SSO0731	187.068	220.986	BOTH	1.18131
NC_002754	625758	626504	-	SSO0735	172.293	220.095	BOTH	1.27745
NC_002754	2162590	2163129	-	SSO2370	113.251	219.287	BOTH	1.93629
NC_002754	1104508	1104819	-	SSO1279	261.072	218.809	BOTH	1.19315
NC_002754	2920754	2921149	+	SSO3174	132.402	218.507	BOTH	1.65032
NC_002754	393598	394158	+	SSO0455	125.487	218.353	BOTH	1.74005
NC_002754	683080	683778	-	SSO0799	110.969	218.19	BOTH	1.96622
NC_002754	2107986	2108585	-	SSO2303	141.228	217.878	BOTH	1.54274
NC_002754	1684224	1684499	-	SSO9092	214.067	217.527	BOTH	1.01616
NC_002754	907366	907821	+	SSO1049	81.074	217.362	BOTH	2.68104
NC_002754	1119607	1120947	-	SSO1291	63.3824	216.942	BOTH	3.42274
NC_002754	1079407	1080216	-	SSO1254	215.945	216.469	BOTH	1.00243
NC_002754	1683320	1683934	+	SSO1868	138.205	216.05	BOTH	1.56326
NC_002754	482449	483393	+	SSO0550	211.42	215.627	BOTH	1.0199
NC_002754	456948	458195	+	SSO0527	122.438	214.819	BOTH	1.75451
NC_002754	862206	863093	+	SSO1005	144.839	214.747	BOTH	1.48266
NC_002754	376608	377348	-	SSO0434	86.4944	214.69	BOTH	2.48213
NC_002754	1964022	1964894	-	SSO2135	238.256	214.633	BOTH	1.11006
NC_002754	909102	909272	+	SSO7115	362.686	214.379	BOTH	1.6918
NC_002754	1866419	1866721	-	SSO2046	45.327	214.351	BOTH	4.72899
NC_002754	1915474	1918680	-	SSO2098	70.6214	214.253	BOTH	3.03383
NC_002754	1428130	1430016	+	SSO1581	184.154	214.247	BOTH	1.16341
NC_002754	1277873	1278292	+	SSO1424	70.1306	214.09	BOTH	3.05274
NC_002754	152828	153853	+	SSO0181	93.6181	213.84	BOTH	2.28417
NC_002754	2489890	2490564	+	SSO2735	72.5574	213.446	BOTH	2.94175
NC_002754	249752	250030	-	SSO5577	167.493	212.957	BOTH	1.27144
NC_002754	2297189	2298469	-	SSO2528	143.221	212.956	BOTH	1.4869
NC_002754	2494349	2495101	-	SSO2740	187.439	212.922	BOTH	1.13596
NC_002754	1548839	1549069	+	SSO8725	86.3779	212.892	BOTH	2.46466
NC_002754	2071040	2071489	-	SSO2255	143.579	212.421	BOTH	1.47947
NC_002754	2169762	2170484	+	SSO2383	76.1033	211.999	BOTH	2.78568
NC_002754	233034	233282	+	SSO5542	100.601	211.669	BOTH	2.10406
NC_002754	774064	775182	-	SSO0909	511.937	211.273	BOTH	2.42311
NC_002754	61719	62819	+	SSO0078	223.123	209.89	BOTH	1.06305
NC_002754	2054626	2054952	+	SSO2238	251.737	209.829	BOTH	1.19972
NC_002754	2388719	2389468	-	SSO2623	55.0515	209.347	BOTH	3.80275
NC_002754	2190206	2190841	-	SSO2406	219.883	209.134	BOTH	1.0514
NC_002754	22052	22492	-	SSO0022	73.6464	208.287	BOTH	2.8282
NC_002754	824180	825628	+	SSO0966	130.133	208.266	BOTH	1.60041
NC_002754	1123604	1124347	+	SSO1294	156.966	207.968	BOTH	1.32492
NC_002754	1676422	1677357	-	SSO1859	186.783	206.985	BOTH	1.10816
NC_002754	54626	55480	-	SSO0066	147.095	206.936	BOTH	1.40682
NC_002754	591723	594278	-	SSO0687	88.5069	206.583	BOTH	2.33409
NC_002754	825625	826563	+	SSO0967	97.4166	206.471	BOTH	2.11947
NC_002754	390329	391183	+	SSO0451	226.502	206.37	BOTH	1.09755
NC_002754	212541	213524	+	SSO0245	72.6838	204.761	BOTH	2.81715
NC_002754	387452	388036	+	SSO0447	89.1833	204.31	BOTH	2.2909
NC_002754	953584	953883	+	SSO1100	693.038	204.044	BOTH	3.39651
NC_002754	177662	178051	-	SSO0206	236.985	203.778	BOTH	1.16296
NC_002754	1402589	1403125	-	SSO1553	266.854	202.737	BOTH	1.31626
NC_002754	868399	870048	-	SSO1012	37.7445	201.718	BOTH	5.3443
NC_002754	2490548	2491108	-	SSO2736	63.2822	200.475	BOTH	3.16795
NC_002754	990748	991818	+	SSO1150	67.0215	200.463	BOTH	2.99103
NC_002754	2890425	2890988	-	SSO3141	66.9275	200.267	BOTH	2.9923
NC_002754	2610021	2611082	+	SSO2850	629.371	200.143	BOTH	3.1446
NC_002754	29591	30088	-	SSO0033	143.79	200.003	BOTH	1.39094
NC_002754	2990967	2991218	-	SSO12252	366.078	199.817	BOTH	1.83206
NC_002754	300674	301030	-	SSO0352	518.025	199.365	BOTH	2.59837
NC_002754	421390	422607	+	SSO0489	736.836	199.155	BOTH	3.69981
NC_002754	700784	701518	+	SSO0818	98.6	198.657	BOTH	2.01477
NC_002754	389010	389447	-	SSO0449	64.882	198.186	BOTH	3.05456
NC_002754	887650	889623	+	SSO1029	96.6609	197.657	BOTH	2.04485
NC_002754	213501	214310	-	SSO0246	138.738	195.889	BOTH	1.41194
NC_002754	1407806	1408669	+	SSO1562	28.2927	195.575	BOTH	6.91253
NC_002754	2891046	2892449	+	SSO3142	81.21	195.531	BOTH	2.40773
NC_002754	1278289	1279041	+	SSO1425	84.6572	195.47	BOTH	2.30895
NC_002754	834557	835240	+	SSO0976	139.796	194.66	BOTH	1.39246
NC_002754	2081153	2082034	-	SSO2272	31.9265	194.563	BOTH	6.0941
NC_002754	2025868	2026740	-	SSO2202	49.8676	194.351	BOTH	3.89733
NC_002754	2009385	2010569	+	SSO2184	81.9314	193.261	BOTH	2.35881
NC_002754	2917555	2918382	-	SSO3169	172.547	193.135	BOTH	1.11932
NC_002754	2366253	2369225	-	SSO2602	73.1873	192.287	BOTH	2.62733
NC_002754	1291579	1292313	-	SSO1439	54.4122	191.787	BOTH	3.52471
NC_002754	236056	236454	+	SSO0277	194.837	191.034	BOTH	1.01991
NC_002754	636420	636761	-	SSO0751	134.618	190.919	BOTH	1.41822
NC_002754	635752	636378	-	SSO0750	318.234	190.735	BOTH	1.66846
NC_002754	2949984	2951066	-	SSO3204	57.4257	190.706	BOTH	3.32091
NC_002754	2145310	2145849	+	SSO2351	91.9764	190.339	BOTH	2.06943
NC_002754	677873	678988	-	SSO0794	199.923	189.591	BOTH	1.0545
NC_002754	81106	82512	+	SSO0100	187.735	189.215	BOTH	1.00788
NC_002754	301577	302740	+	SSO0354	260.692	188.428	BOTH	1.38351
NC_002754	1690648	1691007	+	SSO1877	229.861	187.713	BOTH	1.22453
NC_002754	776890	777141	+	SSO6778	263.247	187.192	BOTH	1.4063
NC_002754	2456673	2458376	+	SSO2704	171.691	186.761	BOTH	1.08777
NC_002754	2192855	2193247	-	SSO2409	202.427	186.735	BOTH	1.08404
NC_002754	2165372	2166136	-	SSO2374	122.058	186.707	BOTH	1.52966
NC_002754	2443316	2444086	-	SSO2686	72.1496	186.69	BOTH	2.58754
NC_002754	598757	599206	-	SSO0693	224.39	186.599	BOTH	1.20253
NC_002754	382601	384325	-	SSO0444	83.9242	186.572	BOTH	2.2231
NC_002754	932640	933317	+	SSO1074	187.152	186.487	BOTH	1.00356
NC_002754	919947	920393	-	SSO1061	190.534	186.458	BOTH	1.02186
NC_002754	296598	297119	-	SSO0346	249.371	185.772	BOTH	1.34235
NC_002754	2304367	2306178	-	SSO2537	72.4106	185.439	BOTH	2.56094
NC_002754	1635712	1637694	-	SSO1806	75.1396	185.179	BOTH	2.46447
NC_002754	853239	854066	-	SSO0996	41.1025	185.115	BOTH	4.50374
NC_002754	2708912	2709121	-	SSO11575	114.348	185.106	BOTH	1.61879
NC_002754	608048	608269	-	SSO6397	247.461	185.07	BOTH	1.33712
NC_002754	1688968	1689495	-	SSO1875	234.594	184.709	BOTH	1.27008
NC_002754	886897	887595	+	SSO1028	173.868	184.645	BOTH	1.06198
NC_002754	2097678	2098781	-	SSO2288	158.829	184.635	BOTH	1.16248
NC_002754	2659937	2661829	-	SSO2909	24.2752	184.337	BOTH	7.59363
NC_002754	616781	617791	-	SSO0723	59.9775	183.079	BOTH	3.05245
NC_002754	2197562	2198356	+	SSO2418	127.991	183.055	BOTH	1.43021
NC_002754	1008055	1008945	-	SSO1169	68.9278	183.05	BOTH	2.65567
NC_002754	695680	696612	+	SSO0809	145.63	183.038	BOTH	1.25688
NC_002754	2708082	2708855	+	SSO2964	66.848	183.017	BOTH	2.73781
NC_002754	1466644	1467852	+	SSO1618	90.2359	182.902	BOTH	2.02693
NC_002754	1852563	1853435	-	SSO2038	35.0261	182.545	BOTH	5.2117
NC_002754	960707	961612	+	SSO1114	129.281	182.386	BOTH	1.41077
NC_002754	2061575	2062390	+	SSO2247	103.632	181.904	BOTH	1.75528
NC_002754	1127121	1128389	-	SSO1299	92.3678	181.667	BOTH	1.96678
NC_002754	230049	231119	-	SSO0269	72.1025	181.347	BOTH	2.51513
NC_002754	1906371	1906922	+	SSO2092	109.381	181.314	BOTH	1.65764
NC_002754	1753659	1754552	+	SSO1934	39.9039	181.043	BOTH	4.53697
NC_002754	2364144	2364893	+	SSO2600	108.145	180.205	BOTH	1.66632
NC_002754	1416337	1416720	+	SSO1570	74.4559	179.403	BOTH	2.40953
NC_002754	994637	995728	+	SSO1153	118.809	179.38	BOTH	1.50981
NC_002754	2109632	2110384	-	SSO2306	161.514	179.303	BOTH	1.11014
NC_002754	742365	742985	-	SSO0870	51.0478	178.989	BOTH	3.50631
NC_002754	2361442	2362596	-	SSO2597	99.2411	178.159	BOTH	1.79521
NC_002754	832542	833411	+	SSO0974	179.706	178.007	BOTH	1.00954
NC_002754	2351114	2351713	-	SSO2582	100.63	177.991	BOTH	1.76877
NC_002754	2500050	2501321	-	SSO2746	52.8996	177.813	BOTH	3.36132
NC_002754	378187	378990	-	SSO0436	91.8571	177.651	BOTH	1.93399
NC_002754	2759451	2760410	+	SSO3013	172.306	177.314	BOTH	1.02907
NC_002754	136780	137088	+	SSO0165	150.672	177.284	BOTH	1.17662
NC_002754	942577	943503	-	SSO1087	131.757	176.389	BOTH	1.33875
NC_002754	406507	407622	-	SSO0472	84.4429	176.142	BOTH	2.08593
NC_002754	2007306	2008547	+	SSO2182	138.677	175.703	BOTH	1.26699
NC_002754	463667	464719	-	SSO0535	88.0185	175.316	BOTH	1.99181
NC_002754	1801739	1802593	+	SSO1990	232.463	174.173	BOTH	1.33467
NC_002754	1896115	1896651	-	SSO2081	142.355	173.756	BOTH	1.22059
NC_002754	833436	834233	+	SSO0975	208.801	172.572	BOTH	1.20993
NC_002754	187602	188081	+	SSO0218	96.0954	172.343	BOTH	1.79345
NC_002754	701525	702574	+	SSO0819	216.767	171.733	BOTH	1.26223
NC_002754	1008947	1009840	-	SSO1170	89.9528	171.449	BOTH	1.90599
NC_002754	1539641	1540336	+	SSO1686	67.6378	170.037	BOTH	2.51393
NC_002754	2916831	2917580	-	SSO3168	265.122	169.783	BOTH	1.56153
NC_002754	1099140	1100186	+	SSO1274	65.1753	169.649	BOTH	2.60296
NC_002754	2989274	2990017	+	SSO3250	342.609	169.572	BOTH	2.02043
NC_002754	2163267	2164274	+	SSO2371	61.3557	169.419	BOTH	2.76127
NC_002754	2206949	2208520	+	SSO2429	103.412	169.399	BOTH	1.6381
NC_002754	660962	661462	-	SSO0776	88.7916	169.398	BOTH	1.90782
NC_002754	1006952	1008058	-	SSO1168	76.8583	169.139	BOTH	2.20066
NC_002754	2048608	2049474	-	SSO2229	105.307	169.129	BOTH	1.60606
NC_002754	68859	69437	-	SSO0085	138.294	168.2	BOTH	1.21625
NC_002754	443033	443440	+	SSO0509	99.5039	168.172	BOTH	1.69011
NC_002754	2697813	2698394	+	SSO2953	125.263	167.809	BOTH	1.33965
NC_002754	1825283	1826815	+	SSO2010	105.761	167.572	BOTH	1.58445
NC_002754	2925963	2926160	+	SSO12127	84.1966	166.98	BOTH	1.98322
NC_002754	775996	776793	-	SSO0911	331.332	166.158	BOTH	1.99407
NC_002754	416732	417616	+	SSO0484	100.725	166.002	BOTH	1.64807
NC_002754	2518404	2519600	-	SSO2761	67.9766	165.956	BOTH	2.44137
NC_002754	1455422	1455709	+	SSO8475	90.8767	165.954	BOTH	1.82615
NC_002754	2295958	2297181	-	SSO2527	164.57	164.951	BOTH	1.00232
NC_002754	519526	520656	+	SSO0592	75.9911	164.693	BOTH	2.16727
NC_002754	2924258	2924584	+	SSO3178	108.303	163.929	BOTH	1.51362
NC_002754	2146176	2146559	+	SSO2352	52.6365	163.733	BOTH	3.11063
NC_002754	2015157	2015987	-	SSO2192	116.522	163.638	BOTH	1.40436
NC_002754	98567	100018	-	SSO0120	31.1722	163.63	BOTH	5.24923
NC_002754	125531	126319	-	SSO0149	85.2831	163.495	BOTH	1.91709
NC_002754	813804	815459	+	SSO0959	110.633	163.438	BOTH	1.4773
NC_002754	643584	644639	-	SSO0760	389.437	163.422	BOTH	2.38302
NC_002754	1896687	1897190	-	SSO2083	136.079	163.038	BOTH	1.19811
NC_002754	682698	683090	-	SSO0798	110.335	162.975	BOTH	1.47709
NC_002754	1352555	1355674	-	SSO1500	56.4501	162.411	BOTH	2.87707
NC_002754	1936374	1937183	+	SSO2112	89.7903	161.989	BOTH	1.80408
NC_002754	898750	899520	-	SSO1038	197.403	161.391	BOTH	1.22314
NC_002754	210097	211104	+	SSO0242	202.148	160.979	BOTH	1.25574
NC_002754	23195	23842	-	SSO0024	119.569	160.964	BOTH	1.3462
NC_002754	1002143	1003558	+	SSO1162	147.257	160.365	BOTH	1.08901
NC_002754	2441975	2442394	-	SSO2681	214.711	159.744	BOTH	1.34409
NC_002754	295940	296596	-	SSO0345	291.213	159.496	BOTH	1.82583
NC_002754	2621546	2621887	-	SSO2866	114.665	159.369	BOTH	1.38986
NC_002754	749413	750879	+	SSO0879	36.1527	159.364	BOTH	4.40807
NC_002754	153826	155106	+	SSO0182	53.2697	159.339	BOTH	2.99118
NC_002754	758096	759133	+	SSO0890	45.935	159.259	BOTH	3.46704
NC_002754	7555	10479	+	SSO0011	124.118	158.955	BOTH	1.28068
NC_002754	798966	799664	+	SSO0940	183.383	158.521	BOTH	1.15683
NC_002754	802675	803556	-	SSO0946	127.902	158.333	BOTH	1.23792
NC_002754	87870	88241	+	SSO0107	400.31	158.23	BOTH	2.52992
NC_002754	1774144	1775268	-	SSO1958	31.0192	158.194	BOTH	5.09986
NC_002754	62827	64047	+	SSO0079	167.45	157.652	BOTH	1.06215
NC_002754	2481492	2482814	+	SSO2727	52.8191	157.156	BOTH	2.97537
NC_002754	826592	828184	+	SSO0968	75.479	156.919	BOTH	2.07897
NC_002754	829584	829640	+	SSOs03	83.3471	156.537	BOTH	1.87814
NC_002754	2444755	2445102	-	SSO2688	125.595	156.422	BOTH	1.24544
NC_002754	2762961	2763821	-	SSO3016	51.5659	156.25	BOTH	3.0301
NC_002754	652597	653070	+	SSO0767	247.835	155.846	BOTH	1.59026
NC_002754	2924591	2925370	-	SSO3179	103.653	155.716	BOTH	1.50227
NC_002754	720549	721523	+	SSO0840	83.4543	155.645	BOTH	1.86503
NC_002754	583766	584650	-	SSO0680	142.597	155.295	BOTH	1.08905
NC_002754	984427	985140	-	SSO1143	78.5143	155.288	BOTH	1.97783
NC_002754	2657101	2657556	+	SSO2906	54.7439	155.172	BOTH	2.83451
NC_002754	50238	51206	-	SSO0060	70.7781	154.895	BOTH	2.18846
NC_002754	200640	202016	+	SSO0232	138.757	154.66	BOTH	1.11461
NC_002754	919106	919945	-	SSO1060	177.692	154.639	BOTH	1.14907
NC_002754	2164806	2165375	-	SSO2373	178.06	154.596	BOTH	1.15178
NC_002754	667951	668595	+	SSO0785	36.426	154.099	BOTH	4.23046
NC_002754	917303	917719	+	SSO1056	175.863	153.429	BOTH	1.14621
NC_002754	537792	538802	-	SSO0618	134.907	153.113	BOTH	1.13495
NC_002754	186945	187526	-	SSO0217	169.936	152.953	BOTH	1.11103
NC_002754	1366323	1366796	-	SSO1513	137.038	152.782	BOTH	1.11488
NC_002754	1421343	1422710	-	SSO1577	229.394	152.745	BOTH	1.50181
NC_002754	759718	760983	+	SSO0893	43.2572	152.486	BOTH	3.52509
NC_002754	2404567	2405754	+	SSO2643	98.6656	152.25	BOTH	1.54309
NC_002754	361565	361765	+	SSO5798	136.658	152.1	BOTH	1.113
NC_002754	771711	771998	+	SSO6768	524.566	152.025	BOTH	3.45053
NC_002754	2741925	2743337	-	SSO3002	121.65	151.992	BOTH	1.24942
NC_002754	51207	52205	-	SSO0061	212.702	151.836	BOTH	1.40087
NC_002754	2364890	2366251	+	SSO2601	117.327	151.793	BOTH	1.29376
NC_002754	1420804	1421211	-	SSO1574	282.21	151.05	BOTH	1.86832
NC_002754	147003	147278	+	SSO5345	180.58	149.111	BOTH	1.21104
NC_002754	462181	462582	-	SSO0532	69.618	148.831	BOTH	2.13782
NC_002754	2465096	2466040	+	SSO2713	202.28	148.143	BOTH	1.36543
NC_002754	343538	343828	-	SSO5763	199.767	147.367	BOTH	1.35557
NC_002754	780980	782347	-	SSO0918	45.2095	147.284	BOTH	3.25782
NC_002754	388033	389013	+	SSO0448	60.7551	147.008	BOTH	2.41968
NC_002754	520622	521494	+	SSO0593	62.8293	146.892	BOTH	2.33795
NC_002754	653092	654084	+	SSO0768	192.154	146.763	BOTH	1.30928
NC_002754	800987	802123	+	SSO0943	123.831	145.513	BOTH	1.1751
NC_002754	176021	176698	+	SSO0202	225.755	144.864	BOTH	1.55839
NC_002754	170623	172464	+	SSO0198	58.2417	144.681	BOTH	2.48415
NC_002754	1882345	1882842	+	SSO2063	181.081	144.585	BOTH	1.25242
NC_002754	2190850	2191893	-	SSO2407	113.764	144.364	BOTH	1.26898
NC_002754	6376	7431	+	SSO0010	29.1198	144.034	BOTH	4.94624
NC_002754	568520	569194	-	SSO0658	92.5203	143.766	BOTH	1.55389
NC_002754	289591	290643	-	SSO0337	309.09	143.59	BOTH	2.15259
NC_002754	521496	522194	+	SSO0594	38.5549	143.184	BOTH	3.71376
NC_002754	2588673	2589065	+	SSO2827	217.373	142.911	BOTH	1.52104
NC_002754	2391867	2392121	+	SSO10784	32.8575	142.404	BOTH	4.33399
NC_002754	382252	382617	-	SSO0442	147.503	142.304	BOTH	1.03654
NC_002754	13920	15314	-	SSO0016	105.325	142.054	BOTH	1.34872
NC_002754	1575173	1575508	+	SSO1736	122.626	141.423	BOTH	1.15329
NC_002754	1984523	1984906	-	SSO2158	91.7765	141.397	BOTH	1.54067
NC_002754	2962648	2962899	-	SSO12199	40.104	141.354	BOTH	3.52469
NC_002754	2044137	2044967	+	SSO2223	124.525	140.915	BOTH	1.13162
NC_002754	743017	743940	+	SSO0871	108.907	140.731	BOTH	1.29221
NC_002754	2136182	2137171	+	SSO2338	30.4504	140.291	BOTH	4.60721
NC_002754	2071570	2073105	+	SSO2256	35.4847	140.181	BOTH	3.95048
NC_002754	2529509	2530423	-	SSO2773	49.5611	140.074	BOTH	2.82629
NC_002754	2293755	2294201	-	SSO2524	118.649	139.418	BOTH	1.17505
NC_002754	1782833	1783108	-	SSO9378	100.148	138.836	BOTH	1.38631
NC_002754	2471736	2472941	+	SSO2719	51.8554	138.737	BOTH	2.67545
NC_002754	21513	22064	+	SSO0021	76.989	138.711	BOTH	1.8017
NC_002754	2932955	2933272	-	SSO3185	124.949	138.553	BOTH	1.10887
NC_002754	511812	512660	-	SSO0583	51.2773	138.498	BOTH	2.70096
NC_002754	222803	224134	-	SSO0258	65.1725	138.439	BOTH	2.12419
NC_002754	32275	34002	+	SSO0037	35.8408	138.415	BOTH	3.86194
NC_002754	1618384	1619436	+	SSO1785	53.7298	137.744	BOTH	2.56364
NC_002754	777138	778397	-	SSO0913	43.4631	137.292	BOTH	3.15882
NC_002754	760984	761571	+	SSO0894	35.9908	137.159	BOTH	3.81094
NC_002754	754612	755694	-	SSO0886	78.6413	137.058	BOTH	1.74282
NC_002754	2503123	2504163	-	SSO2749	76.7527	136.873	BOTH	1.7833
NC_002754	2213911	2215062	+	SSO2438	26.3932	136.474	BOTH	5.17079
NC_002754	2318128	2319645	+	SSO2549	118.072	135.51	BOTH	1.14769
NC_002754	1897233	1898183	-	SSO2085	34.424	135.135	BOTH	3.92561
NC_002754	1653996	1655258	-	SSO1824	82.0692	135.049	BOTH	1.64555
NC_002754	757372	758109	+	SSO0889	53.9569	134.961	BOTH	2.50128
NC_002754	1998933	1999832	+	SSO2175	38.2942	134.954	BOTH	3.52413
NC_002754	2198301	2200124	-	SSO2420	98.8799	134.922	BOTH	1.36451
NC_002754	2754394	2755527	+	SSO3010	44.6362	134.736	BOTH	3.01855
NC_002754	500806	502251	+	SSO0569	75.8644	134.604	BOTH	1.77427
NC_002754	1293799	1294521	-	SSO1441	60.572	134.508	BOTH	2.22064
NC_002754	837100	837783	-	SSO0978	42.0524	134.29	BOTH	3.1934
NC_002754	2649690	2649938	+	SSO11412	59.3197	134.168	BOTH	2.26178
NC_002754	924309	924665	+	SSO1066	366.078	134.073	BOTH	2.73044
NC_002754	767419	767742	+	SSO0901	215.945	133.852	BOTH	1.61331
NC_002754	2166513	2167706	-	SSO2377	63.5897	133.759	BOTH	2.10346
NC_002754	34685	35257	-	SSO0039	137.632	133.748	BOTH	1.02904
NC_002754	2294204	2295541	-	SSO2526	122.788	133.683	BOTH	1.08872
NC_002754	1708042	1709634	-	SSO1893	439.969	133.559	BOTH	3.29419
NC_002754	1198232	1198675	+	SSO1362	144.352	133.506	BOTH	1.08124
NC_002754	524987	525586	+	SSO0600	50.531	133.148	BOTH	2.63497
NC_002754	1457989	1458435	-	SSO1610	88.89	132.765	BOTH	1.49358
NC_002754	234061	235572	-	SSO0274	134.48	132.159	BOTH	1.01756
NC_002754	784602	784970	+	SSO0922	103.232	132.149	BOTH	1.28012
NC_002754	2134538	2135158	+	SSO2336	790.197	131.43	BOTH	6.01233
NC_002754	2492589	2494097	+	SSO2738	155.812	131.276	BOTH	1.1869
NC_002754	24484	25713	+	SSO0026	82.3048	131.25	BOTH	1.59468
NC_002754	952759	953226	+	SSO1098	233.848	131.241	BOTH	1.78182
NC_002754	108316	109137	-	SSO0128	25.6401	131.099	BOTH	5.11302
NC_002754	1152745	1153746	-	SSO1322	115.946	130.811	BOTH	1.1282
NC_002754	569617	570948	+	SSO0660	26.3932	130.806	BOTH	4.95603
NC_002754	22598	23215	+	SSO0023	63.176	130.613	BOTH	2.06744
NC_002754	129588	130016	-	SSO0154	46.9138	130.596	BOTH	2.78374
NC_002754	1180704	1181360	+	SSO1344	88.2185	130.439	BOTH	1.47859
NC_002754	1168340	1169653	-	SSO1333	100.577	130.229	BOTH	1.29482
NC_002754	959676	960710	+	SSO1112	59.2544	130.048	BOTH	2.19475
NC_002754	2589587	2590462	-	SSO2829	244.047	130.045	BOTH	1.87664
NC_002754	2342279	2343103	-	SSO2570	134.121	129.784	BOTH	1.03342
NC_002754	2615380	2615796	-	SSO2857	77.6779	129.544	BOTH	1.66771
NC_002754	559125	559973	+	SSO0645	89.7353	129.211	BOTH	1.43991
NC_002754	794235	796136	-	SSO0936	61.7179	129.098	BOTH	2.09175
NC_002754	438552	439487	+	SSO0505	56.201	128.729	BOTH	2.2905
NC_002754	2937943	2939055	-	SSO3191	18.3155	128.578	BOTH	7.02019
NC_002754	988438	989463	-	SSO1148	73.7495	128.56	BOTH	1.7432
NC_002754	1027899	1028879	-	SSO1185	45.8745	128.535	BOTH	2.80188
NC_002754	2192042	2192656	-	SSO2408	154.918	128.213	BOTH	1.20829
NC_002754	2707149	2707325	-	SSO11571	48.313	128.175	BOTH	2.65301
NC_002754	505789	506220	-	SSO0575	119.369	128.088	BOTH	1.07304
NC_002754	1102450	1103427	+	SSO1277	61.7363	128.08	BOTH	2.07463
NC_002754	2427250	2428122	-	SSO2671	35.9166	128.035	BOTH	3.5648
NC_002754	513790	514164	-	SSO0585	113.558	126.715	BOTH	1.11586
NC_002754	2009008	2009310	+	SSO2183	35.3494	126.008	BOTH	3.56466
NC_002754	2745789	2748695	-	SSO3006	93.5092	125.915	BOTH	1.34655
NC_002754	654081	655298	+	SSO0769	262.892	125.899	BOTH	2.08813
NC_002754	2737693	2738847	+	SSO2996	72.6172	125.819	BOTH	1.73263
NC_002754	2716493	2718865	+	SSO2973	90.1635	124.956	BOTH	1.38589
NC_002754	1037675	1038160	-	SSO1195	47.81	124.815	BOTH	2.61064
NC_002754	506253	507260	-	SSO0576	177.297	124.68	BOTH	1.42202
NC_002754	346650	348368	+	SSO0395	25.9787	124.655	BOTH	4.79834
NC_002754	156923	158560	+	SSO0185	35.9117	124.654	BOTH	3.47112
NC_002754	2972253	2973071	-	SSO3226	97.1355	124.654	BOTH	1.2833
NC_002754	2495767	2497512	+	SSO2742	53.9243	124.43	BOTH	2.3075
NC_002754	847516	849384	+	SSO0990	45.4304	124.42	BOTH	2.7387
NC_002754	572192	572893	-	SSO0662	78.8721	124.245	BOTH	1.57528
NC_002754	954677	954997	+	SSO1102	486.245	123.898	BOTH	3.92455
NC_002754	779470	780996	-	SSO0917	58.7166	123.523	BOTH	2.10372
NC_002754	77945	78065	-	SSOr02	226.296	123.473	BOTH	1.83276
NC_002754	297579	297767	-	SSO5663	171.385	123.331	BOTH	1.38964
NC_002754	1064502	1065716	+	SSO1225	86.6622	123.306	BOTH	1.42284
NC_002754	2113415	2114233	+	SSO2310	62.1203	123.133	BOTH	1.98218
NC_002754	841379	842476	-	SSO0985	67.5761	122.965	BOTH	1.81965
NC_002754	1463138	1464673	+	SSO1615	55.3921	122.439	BOTH	2.21041
NC_002754	524697	524990	+	SSO6223	57.879	122.337	BOTH	2.11367
NC_002754	949342	951909	-	SSO1095	100.976	122.148	BOTH	1.20967
NC_002754	1632858	1633280	+	SSO1802	77.1887	122.147	BOTH	1.58245
NC_002754	2390314	2391477	+	SSO2625	22.5592	121.935	BOTH	5.4051
NC_002754	1731989	1732768	-	SSO1913	32.6685	121.664	BOTH	3.72419
NC_002754	377589	377816	-	SSO5844	154.192	121.65	BOTH	1.26751
NC_002754	2879784	2881247	+	SSO3129	39.8259	121.61	BOTH	3.05355
NC_002754	288531	289544	-	SSO0335	74.5371	121.555	BOTH	1.6308
NC_002754	2378160	2379053	+	SSO2612	104.252	121.469	BOTH	1.16514
NC_002754	462588	463667	-	SSO0534	43.1089	121.235	BOTH	2.8123
NC_002754	433904	434368	+	SSO0502	33.8081	121.08	BOTH	3.5814
NC_002754	750854	751135	-	SSO6716	54.2159	120.675	BOTH	2.22583
NC_002754	2185709	2186512	-	SSO2400	42.1146	120.441	BOTH	2.85984
NC_002754	1014320	1015573	-	SSO1173	43.12	120.133	BOTH	2.78602
NC_002754	1015610	1016533	-	SSO1174	17.9486	119.92	BOTH	6.68131
NC_002754	2986787	2987929	+	SSO3245	190.288	119.757	BOTH	1.58895
NC_002754	1983860	1984561	+	SSO2157	85.0244	119.713	BOTH	1.40799
NC_002754	394148	394873	+	SSO0456	206.426	119.471	BOTH	1.72783
NC_002754	211105	212514	+	SSO0244	155.419	119.449	BOTH	1.30113
NC_002754	2045359	2045628	-	SSO10051	101.734	119.378	BOTH	1.17343
NC_002754	966944	968284	-	SSO1123	117.232	119.199	BOTH	1.01678
NC_002754	287131	288432	-	SSO0334	118.687	118.945	BOTH	1.00218
NC_002754	30202	30864	+	SSO0034	40.2576	118.931	BOTH	2.95424
NC_002754	257014	258054	+	SSO0302	78.5781	118.867	BOTH	1.51273
NC_002754	43434	43829	+	SSO0049	54.3133	118.773	BOTH	2.1868
NC_002754	911795	913708	+	SSO1053	109.304	118.749	BOTH	1.08641
NC_002754	2038638	2040353	-	SSO2216	47.8702	118.464	BOTH	2.47468
NC_002754	936420	938927	+	SSO1079	91.1307	118.258	BOTH	1.29767
NC_002754	375949	376620	-	SSO0433	48.459	117.852	BOTH	2.432
NC_002754	1720018	1721391	+	SSO1903	41.4915	117.847	BOTH	2.84026
NC_002754	147343	149652	+	SSO0176	166.025	117.794	BOTH	1.40945
NC_002754	933741	934313	+	SSO1076	214.965	117.694	BOTH	1.82648
NC_002754	854063	855526	-	SSO0997	28.3206	117.642	BOTH	4.15392
NC_002754	2069543	2071048	+	SSO2254	59.65	117.622	BOTH	1.97186
NC_002754	2473023	2474357	+	SSO2720	88.513	117.404	BOTH	1.3264
NC_002754	2973081	2973752	-	SSO3227	125.711	117.029	BOTH	1.07418
NC_002754	1775365	1775841	+	SSO1959	52.1527	117.019	BOTH	2.24378
NC_002754	326885	327829	-	SSO0383	95.7926	116.743	BOTH	1.21871
NC_002754	1993637	1994308	-	SSO2169	64.0122	116.72	BOTH	1.82341
NC_002754	1487906	1489453	+	SSO1636	146.307	116.664	BOTH	1.25408
NC_002754	1282426	1283310	+	SSO1429	82.4738	116.608	BOTH	1.41388
NC_002754	1384983	1386137	+	SSO1533	104.027	116.058	BOTH	1.11565
NC_002754	1018989	1020059	+	SSO1177	34.2769	115.796	BOTH	3.37825
NC_002754	79467	80372	-	SSO0098	87.7126	115.661	BOTH	1.31864
NC_002754	2085729	2087216	+	SSO2277	89.2803	115.558	BOTH	1.29433
NC_002754	2025294	2025884	-	SSO2201	42.3851	115.162	BOTH	2.71705
NC_002754	2314425	2315126	+	SSO2545	194.658	114.787	BOTH	1.69582
NC_002754	252385	253464	-	SSO0295	84.2984	114.639	BOTH	1.35992
NC_002754	977985	979136	-	SSO1140	51.5118	114.499	BOTH	2.22277
NC_002754	947203	947754	-	SSO1092	156.951	114.277	BOTH	1.37343
NC_002754	2499504	2499842	-	SSO2745	174.285	114.259	BOTH	1.52534
NC_002754	190547	193189	-	SSO0225	103.928	114.102	BOTH	1.09789
NC_002754	619850	620578	-	SSO0726	100.715	113.382	BOTH	1.12577
NC_002754	1480658	1482070	-	SSO1629	146.836	113.37	BOTH	1.29519
NC_002754	2144479	2145309	+	SSO2350	78.582	112.866	BOTH	1.43628
NC_002754	2104864	2105547	-	SSO2296	72.3604	112.549	BOTH	1.55539
NC_002754	2052124	2052840	+	SSO2234	27.2265	111.999	BOTH	4.11362
NC_002754	2194603	2195046	-	SSO2413	66.7288	111.852	BOTH	1.67622
NC_002754	1779283	1779681	+	SSO1964	33.9883	111.639	BOTH	3.28463
NC_002754	2334605	2335153	-	SSO2561	136.096	111.626	BOTH	1.21922
NC_002754	486104	488752	+	SSO0552	118.203	111.389	BOTH	1.06118
NC_002754	1410329	1411699	-	SSO1565	22.7443	111.344	BOTH	4.89548
NC_002754	2712932	2713372	-	SSO2969	52.8844	111.045	BOTH	2.09976
NC_002754	2141705	2142397	+	SSO2346	120.904	110.788	BOTH	1.09131
NC_002754	2076545	2077186	+	SSO2263	20.7199	110.754	BOTH	5.34531
NC_002754	181819	182715	-	SSO0212	50.2667	110.653	BOTH	2.20131
NC_002754	2505750	2506250	-	SSO2751	29.8271	110.585	BOTH	3.70755
NC_002754	1682955	1683302	+	SSO1867	72.9744	110.509	BOTH	1.51435
NC_002754	507232	507624	-	SSO0577	135.611	110.351	BOTH	1.2289
NC_002754	300522	300683	-	SSO5672	334.314	110.156	BOTH	3.03492
NC_002754	385500	385661	+	SSO5866	242.604	110.156	BOTH	2.20238
NC_002754	225950	226273	-	SSO0260	94.3758	110.156	BOTH	1.1672
NC_002754	392359	392811	-	SSO0454	231.294	110.088	BOTH	2.101
NC_002754	934340	935677	-	SSO1077	214.202	109.903	BOTH	1.94901
NC_002754	2142445	2142906	-	SSO2347	105.448	109.89	BOTH	1.04212
NC_002754	2107321	2107989	-	SSO2301	95.9324	109.8	BOTH	1.14455
NC_002754	1405449	1405745	+	SSO8359	65.7286	109.69	BOTH	1.66883
NC_002754	2714884	2715642	-	SSO2971	38.1246	109.629	BOTH	2.87555
NC_002754	806139	806999	+	SSO0950	106.543	109.415	BOTH	1.02696
NC_002754	2358170	2358685	-	SSO2591	168.571	109.381	BOTH	1.54113
NC_002754	2018852	2019943	-	SSO2197	79.3379	109.072	BOTH	1.37478
NC_002754	2460870	2461895	+	SSO2708	91.6818	109.01	BOTH	1.189
NC_002754	2162297	2162611	-	SSO2369	80.3451	108.472	BOTH	1.35008
NC_002754	221077	222270	-	SSO0257	39.4271	108.038	BOTH	2.7402
NC_002754	264668	264982	-	SSO0312	109.138	108.033	BOTH	1.01022
NC_002754	495585	495887	+	SSO0560	122.297	107.974	BOTH	1.13265
NC_002754	2319642	2319944	-	SSO2550	186.439	107.746	BOTH	1.73036
NC_002754	299584	300255	-	SSO0351	169.028	107.663	BOTH	1.56998
NC_002754	159972	161090	+	SSO0187	71.4798	107.615	BOTH	1.50552
NC_002754	940121	940585	-	SSO1082	63.158	107.544	BOTH	1.70278
NC_002754	427181	429337	+	SSO0496	35.2399	107.487	BOTH	3.05015
NC_002754	2001586	2002656	+	SSO2178	42.9066	107.465	BOTH	2.50462
NC_002754	786874	788313	+	SSO0927	122.129	106.874	BOTH	1.14274
NC_002754	258056	259051	+	SSO0304	58.4525	106.39	BOTH	1.82012
NC_002754	308410	309468	+	SSO0363	59.6244	106.331	BOTH	1.78335
NC_002754	145235	146368	-	SSO0174	32.2965	106.313	BOTH	3.29179
NC_002754	103509	104171	-	SSO0123	62.4057	105.994	BOTH	1.69847
NC_002754	1408758	1409189	+	SSO1563	20.5947	105.993	BOTH	5.14661
NC_002754	2106526	2107314	-	SSO2299	97.9825	105.811	BOTH	1.0799
NC_002754	840744	841259	-	SSO0983	67.6292	105.628	BOTH	1.56187
NC_002754	1700448	1701320	+	SSO1885	62.9282	105.613	BOTH	1.67831
NC_002754	2421630	2422811	-	SSO2665	60.6545	105.565	BOTH	1.74044
NC_002754	2104400	2104804	-	SSO2295	56.7321	105.545	BOTH	1.8604
NC_002754	2462910	2463539	+	SSO2711	20.0177	105.508	BOTH	5.27073
NC_002754	1850848	1852560	+	SSO2037	25.3637	105.508	BOTH	4.15979
NC_002754	2756764	2759355	-	SSO3012	46.988	105.433	BOTH	2.24382
NC_002754	1843119	1843757	+	SSO2029	20.2765	105.429	BOTH	5.19957
NC_002754	2940120	2941649	-	SSO3194	175.296	105.153	BOTH	1.66706
NC_002754	467074	467478	-	SSO0539	46.708	104.691	BOTH	2.24139
NC_002754	1366799	1367608	-	SSO1514	102.8	104.605	BOTH	1.01756
NC_002754	360575	361012	+	SSO0414	72.376	104.541	BOTH	1.44442
NC_002754	174056	174355	+	SSO0200	372.864	104.443	BOTH	3.57003
NC_002754	2466033	2467679	+	SSO2714	167.931	104.36	BOTH	1.60914
NC_002754	2358713	2359396	+	SSO2592	118.833	104.055	BOTH	1.14202
NC_002754	537335	537808	+	SSO0617	71.0704	104.043	BOTH	1.46395
NC_002754	923215	924312	+	SSO1065	45.785	103.499	BOTH	2.26055
NC_002754	2045924	2046595	+	SSO2226	71.4674	103.443	BOTH	1.44741
NC_002754	1045601	1046758	-	SSO1207	77.3522	103.154	BOTH	1.33356
NC_002754	355009	355788	+	SSO0405	29.2356	103.131	BOTH	3.52757
NC_002754	1364918	1366330	-	SSO1512	115.537	103.091	BOTH	1.12074
NC_002754	330962	331702	-	SSO0387	115.753	102.771	BOTH	1.12632
NC_002754	2037536	2038666	-	SSO2215	51.5518	102.62	BOTH	1.99062
NC_002754	2766637	2768106	+	SSO3019	73.9794	102.528	BOTH	1.3859
NC_002754	338970	341201	+	SSO0391	74.1874	102.481	BOTH	1.38138
NC_002754	901138	901704	+	SSO1041	141.069	102.47	BOTH	1.37668
NC_002754	1990873	1991295	-	SSO2165	33.0809	102.198	BOTH	3.08934
NC_002754	249	857	+	SSO0001	51.77	101.877	BOTH	1.96788
NC_002754	1355907	1356590	+	SSO1501	54.0493	101.83	BOTH	1.88402
NC_002754	759126	759740	+	SSO0892	43.1187	101.783	BOTH	2.36053
NC_002754	1271424	1273034	-	SSO1419	43.1621	101.755	BOTH	2.3575
NC_002754	1880014	1881159	+	SSO2061	132.356	101.639	BOTH	1.30221
NC_002754	2888776	2890428	-	SSO3140	57.7943	101.345	BOTH	1.75355
NC_002754	2389452	2390252	-	SSO2624	26.9594	101.29	BOTH	3.75715
NC_002754	2713350	2714999	-	SSO2970	40.1003	101.278	BOTH	2.52562
NC_002754	1701327	1702997	-	SSO1886	91.3403	100.792	BOTH	1.10348
NC_002754	1857849	1859327	-	SSO2042	47.1895	100.735	BOTH	2.13469
NC_002754	46297	47328	+	SSO0052	95.5848	100.668	BOTH	1.05318
NC_002754	1604963	1605760	-	SSO1773	92.8724	100.631	BOTH	1.08354
NC_002754	1078983	1079435	+	SSO1253	174.09	100.469	BOTH	1.73279
NC_002754	1807379	1808365	-	SSO1994	36.1439	100.212	BOTH	2.77259
NC_002754	1406046	1406915	+	SSO1560	55.8974	100.174	BOTH	1.7921
NC_002754	2927727	2928887	-	SSO3181	58.1804	100.087	BOTH	1.72029
NC_002754	1280804	1282480	+	SSO1428	61.6543	100.06	BOTH	1.62292
NC_002754	133415	134593	+	SSO0160	36.3388	99.8501	BOTH	2.74776
NC_002754	1248817	1249788	+	SSO1401	86.0224	99.8376	BOTH	1.1606
NC_002754	300252	300518	-	SSO5671	358.775	99.736	BOTH	3.59725
NC_002754	2963286	2964722	+	SSO3216	83.2521	99.5878	BOTH	1.19622
NC_002754	1881105	1882334	+	SSO2062	141.997	99.3651	BOTH	1.42904
NC_002754	562836	563246	+	SSO0650	74.6086	99.2917	BOTH	1.33083
NC_002754	183541	184449	-	SSO0214	36.4897	99.1478	BOTH	2.71715
NC_002754	1044711	1045613	-	SSO1206	78.0557	98.8874	BOTH	1.26688
NC_002754	2752144	2754315	+	SSO3009	135.93	98.8154	BOTH	1.37559
NC_002754	843169	844869	-	SSO0987	36.6128	98.7702	BOTH	2.69769
NC_002754	151633	152913	+	SSO0180	116.587	97.8929	BOTH	1.19096
NC_002754	691118	691417	-	SSO0806	616.45	97.7568	BOTH	6.30595
NC_002754	48833	49279	+	SSO0057	74.397	97.6392	BOTH	1.31241
NC_002754	988135	988437	+	SSO1147	60.7211	97.4738	BOTH	1.60527
NC_002754	45603	46343	-	SSO0053	44.0632	97.0773	BOTH	2.20314
NC_002754	1124576	1126654	-	SSO1297	277.29	97.0475	BOTH	2.85726
NC_002754	2643850	2644194	+	SSO2891	137.704	97.0351	BOTH	1.41911
NC_002754	66854	67888	+	SSO0083	70.8549	96.9683	BOTH	1.36855
NC_002754	2145846	2146082	-	SSO10258	56.4918	96.6011	BOTH	1.71
NC_002754	2621174	2621488	-	SSO2865	42.7776	96.3954	BOTH	2.25341
NC_002754	2675378	2675872	+	SSO2930	99.1164	96.2757	BOTH	1.02951
NC_002754	402506	403264	+	SSO0467	50.5293	96.0509	BOTH	1.90089
NC_002754	2103749	2104255	-	SSO2294	29.8148	95.4976	BOTH	3.20302
NC_002754	2452342	2452662	-	SSO2699	234.108	95.4556	BOTH	2.45254
NC_002754	122786	124021	+	SSO0144	189.947	95.4132	BOTH	1.99079
NC_002754	739961	740287	-	SSO0866	184.643	95.3963	BOTH	1.93553
NC_002754	2082845	2083261	-	SSO2273	34.1783	95.375	BOTH	2.79051
NC_002754	229516	229998	-	SSO0267	53.472	95.3739	BOTH	1.78362
NC_002754	595591	596142	+	SSO0689	31.9223	95.1054	BOTH	2.97928
NC_002754	1519238	1519717	+	SSO1664	49.4873	94.9613	BOTH	1.9189
NC_002754	1908797	1910953	+	SSO2094	38.0031	94.7246	BOTH	2.49255
NC_002754	1484423	1484911	-	SSO1634	48.2232	94.628	BOTH	1.96229
NC_002754	1888545	1889006	-	SSO2071	64.316	94.6189	BOTH	1.47116
NC_002754	34256	34702	+	SSO0038	77.2956	94.5445	BOTH	1.22315
NC_002754	253437	254333	-	SSO0296	78.1927	94.5367	BOTH	1.20902
NC_002754	332169	333398	-	SSO0388	38.9754	94.4728	BOTH	2.42391
NC_002754	2026797	2027651	+	SSO2203	16.6694	94.4077	BOTH	5.66353
NC_002754	220557	221096	-	SSO0256	41.9093	94.1448	BOTH	2.2464
NC_002754	569181	569582	-	SSO0659	57.8001	94.1161	BOTH	1.6283
NC_002754	2222038	2223468	+	SSO2450	31.2071	94.0118	BOTH	3.01251
NC_002754	849392	851026	+	SSO0991	25.8869	94.0002	BOTH	3.63118
NC_002754	762340	763548	+	SSO0897	85.3062	93.8825	BOTH	1.10054
NC_002754	1886722	1888548	+	SSO2070	52.621	93.8514	BOTH	1.78353
NC_002754	450970	451329	-	SSO0523	38.87	93.3762	BOTH	2.40227
NC_002754	855569	856504	+	SSO0998	83.1479	92.9624	BOTH	1.11804
NC_002754	572859	573935	-	SSO0664	58.5477	92.9299	BOTH	1.58725
NC_002754	1553115	1553609	+	SSO1705	97.8949	92.5029	BOTH	1.05829
NC_002754	2406950	2407765	-	SSO2646	108.29	92.4777	BOTH	1.17098
NC_002754	2725126	2726088	+	SSO2982	55.0737	92.0798	BOTH	1.67194
NC_002754	1381827	1383182	+	SSO1531	455.841	91.9174	BOTH	4.95924
NC_002754	317426	318394	+	SSO0373	43.5009	91.7952	BOTH	2.11019
NC_002754	535932	536519	+	SSO0615	64.0489	91.7529	BOTH	1.43254
NC_002754	1047021	1047593	-	SSO1208	50.9524	91.6199	BOTH	1.79815
NC_002754	2533409	2534632	-	SSO2776	55.6798	91.6018	BOTH	1.64515
NC_002754	1196929	1198053	-	SSO1361	60.8868	91.4242	BOTH	1.50154
NC_002754	2459292	2460002	+	SSO2706	131.207	91.3479	BOTH	1.43634
NC_002754	530119	530592	-	SSO0606	90.2047	91.3479	BOTH	1.01267
NC_002754	2755698	2756789	+	SSO3011	68.8966	91.2733	BOTH	1.32479
NC_002754	2934771	2934827	-	SSOs06	45.462	91.01	BOTH	2.00189
NC_002754	15589	17808	+	SSO0017	30.349	91.0083	BOTH	2.99873
NC_002754	30861	31190	+	SSO0035	78.5253	90.9658	BOTH	1.15843
NC_002754	2516119	2518407	-	SSO2760	57.6607	90.7126	BOTH	1.57321
NC_002754	1806774	1807262	-	SSO1993	50.5196	90.5261	BOTH	1.7919
NC_002754	1545396	1546784	+	SSO1693	163.739	90.4806	BOTH	1.80966
NC_002754	2633493	2635001	-	SSO2881	687.474	90.2983	BOTH	7.61336
NC_002754	644710	646629	+	SSO0761	101.539	90.2781	BOTH	1.12474
NC_002754	2075955	2076548	+	SSO2262	13.3784	90.1274	BOTH	6.73679
NC_002754	1549199	1549657	+	SSO1697	43.8476	90.1137	BOTH	2.05516
NC_002754	1882843	1883277	+	SSO2064	164.614	89.9974	BOTH	1.8291
NC_002754	11767	11946	-	SSO5027	119.489	89.9179	BOTH	1.32887
NC_002754	1679250	1680446	+	SSO1863	95.2538	89.8543	BOTH	1.06009
NC_002754	1415881	1416306	+	SSO1569	112.129	89.6256	BOTH	1.25108
NC_002754	2050756	2051163	-	SSO2232	91.2472	89.3415	BOTH	1.02133
NC_002754	914084	915613	+	SSO1054	52.5042	89.3302	BOTH	1.70139
NC_002754	131917	132345	+	SSO0157	46.3098	89.1601	BOTH	1.9253
NC_002754	84916	85734	-	SSO0103	153.244	88.9297	BOTH	1.72321
NC_002754	1153789	1155090	-	SSO1324	52.4769	88.9297	BOTH	1.69465
NC_002754	2928941	2930848	+	SSO3182	59.3056	88.9246	BOTH	1.49943
NC_002754	207852	208922	+	SSO0239	65.3278	88.8652	BOTH	1.3603
NC_002754	433155	433844	-	SSO0501	76.989	88.4142	BOTH	1.1484
NC_002754	310168	311073	+	SSO0365	51.0068	87.9482	BOTH	1.72424
NC_002754	2149579	2149869	+	SSO10269	53.4296	87.945	BOTH	1.646
NC_002754	2049579	2050109	+	SSO2230	21.7978	87.9249	BOTH	4.03366
NC_002754	1357488	1358021	+	SSO1503	60.9821	87.8195	BOTH	1.44009
NC_002754	429334	430944	+	SSO0497	23.7526	87.7582	BOTH	3.69468
NC_002754	785043	786044	+	SSO0923	47.0682	87.7365	BOTH	1.86403
NC_002754	2178847	2179395	-	SSO2391	57.5852	87.4359	BOTH	1.51837
NC_002754	522187	522768	+	SSO0596	39.7754	87.232	BOTH	2.19311
NC_002754	1027341	1027898	+	SSO1184	76.1611	87.1412	BOTH	1.14417
NC_002754	1715787	1717454	-	SSO1900	171.202	86.9156	BOTH	1.96975
NC_002754	768805	769428	+	SSO0904	53.8477	86.5703	BOTH	1.60769
NC_002754	1667701	1669113	+	SSO1842	135.405	86.3983	BOTH	1.56722
NC_002754	26805	27947	+	SSO0029	101.643	86.2931	BOTH	1.17788
NC_002754	639120	640448	+	SSO0755	69.2843	86.2383	BOTH	1.2447
NC_002754	2712484	2712930	-	SSO2968	48.6962	86.1887	BOTH	1.76992
NC_002754	767703	768017	-	SSO0902	114.896	86.0752	BOTH	1.33484
NC_002754	2534652	2535008	-	SSO2777	91.7009	86.0235	BOTH	1.066
NC_002754	370903	371634	+	SSO0426	73.5156	85.987	BOTH	1.16964
NC_002754	164314	164934	+	SSO0190	82.3441	85.9861	BOTH	1.04423
NC_002754	1992148	1992753	+	SSO2166	11.9732	85.9459	BOTH	7.1782
NC_002754	1970712	1971041	-	SSO2142	48.6857	85.9355	BOTH	1.76511
NC_002754	897163	897495	-	SSO1036	60.4386	85.7844	BOTH	1.41937
NC_002754	839386	840744	-	SSO0981	55.4878	85.5052	BOTH	1.54097
NC_002754	632028	633251	-	SSO0745	68.7353	85.4988	BOTH	1.24388
NC_002754	1290519	1291598	-	SSO1438	32.3117	85.3067	BOTH	2.64012
NC_002754	2436090	2436854	+	SSO2676	237.68	85.1711	BOTH	2.79062
NC_002754	1018510	1018917	-	SSO1176	237.116	85.1032	BOTH	2.78621
NC_002754	1690351	1690563	-	SSO9115	119.226	85.0794	BOTH	1.40135
NC_002754	69430	69993	-	SSO0086	81.0175	84.9878	BOTH	1.04901
NC_002754	531252	531563	-	SSO0608	108.249	84.9076	BOTH	1.27491
NC_002754	763524	763581	+	SSOs01	235.305	84.6707	BOTH	2.77906
NC_002754	1072986	1073279	+	SSO7475	37.0191	84.4597	BOTH	2.28152
NC_002754	2301034	2302002	-	SSO2534	49.206	84.1575	BOTH	1.71031
NC_002754	829696	830091	+	SSO0970	104.919	84.0142	BOTH	1.24882
NC_002754	820990	823791	-	SSO0965	54.1942	84.0033	BOTH	1.55004
NC_002754	763562	766090	-	SSO0899	66.8412	83.7177	BOTH	1.25249
NC_002754	2370190	2371680	-	SSO2605	68.7083	83.5021	BOTH	1.21531
NC_002754	1662175	1662567	+	SSO1834	96.9278	83.4235	BOTH	1.16188
NC_002754	1992750	1993250	+	SSO2167	38.62	83.1115	BOTH	2.15203
NC_002754	2105534	2106547	-	SSO2297	86.9742	83.0147	BOTH	1.0477
NC_002754	1914354	1914725	+	SSO2096	43.1889	82.9267	BOTH	1.92009
NC_002754	1751793	1752224	+	SSO1932	87.7775	82.7769	BOTH	1.06041
NC_002754	995700	996191	+	SSO1154	89.8892	82.5231	BOTH	1.08926
NC_002754	1998652	1998921	+	SSO9953	63.6637	82.4887	BOTH	1.2957
NC_002754	264045	264707	+	SSO0311	57.3247	82.3125	BOTH	1.4359
NC_002754	489798	490109	-	SSO0555	68.1056	82.2473	BOTH	1.20764
NC_002754	1193091	1194272	+	SSO1355	97.9972	82.1584	BOTH	1.19278
NC_002754	205329	206300	-	SSO0237	27.8151	82.0475	BOTH	2.94975
NC_002754	1841761	1842330	-	SSO2027	61.0707	81.909	BOTH	1.34122
NC_002754	935746	936423	+	SSO1078	40.2587	81.8177	BOTH	2.0323
NC_002754	634524	635147	-	SSO0748	148.531	81.6931	BOTH	1.81816
NC_002754	1391826	1393118	+	SSO1539	11.1563	81.6316	BOTH	7.31709
NC_002754	1543262	1545244	-	SSO1692	86.857	81.5501	BOTH	1.06508
NC_002754	2944751	2945137	+	SSO3199	39.9525	81.4998	BOTH	2.03991
NC_002754	1062806	1063813	-	SSO1223	112.514	81.3817	BOTH	1.38255
NC_002754	361738	362277	+	SSO0416	48.4676	81.2079	BOTH	1.67551
NC_002754	514276	514563	+	SSO6206	83.6785	81.1758	BOTH	1.03083
NC_002754	182678	183577	-	SSO0213	37.8143	81.0798	BOTH	2.14416
NC_002754	800089	801021	+	SSO0942	97.6727	80.8808	BOTH	1.20761
NC_002754	2988756	2989226	+	SSO3248	49.3326	80.7689	BOTH	1.63723
NC_002754	2458404	2459261	+	SSO2705	73.995	80.6955	BOTH	1.09055
NC_002754	733203	735080	-	SSO0857	50.5021	80.6218	BOTH	1.59641
NC_002754	1340550	1340996	+	SSO1483	57.7785	80.4634	BOTH	1.39262
NC_002754	536506	537174	+	SSO0616	79.9221	80.2303	BOTH	1.00386
NC_002754	208923	209972	+	SSO0241	64.3309	80.1685	BOTH	1.24619
NC_002754	297799	298875	-	SSO0348	121.266	80.0212	BOTH	1.51542
NC_002754	2328680	2329435	-	SSO2555	27.7643	79.8721	BOTH	2.87679
NC_002754	1617122	1617568	+	SSO1784	28.2129	79.8445	BOTH	2.83007
NC_002754	2901511	2902590	+	SSO3149	44.9485	79.6068	BOTH	1.77107
NC_002754	1985781	1986086	-	SSO2160	35.2851	79.5653	BOTH	2.25493
NC_002754	1286107	1286691	+	SSO1433	68.0687	79.3358	BOTH	1.16553
NC_002754	2953037	2955046	-	SSO3207	46.1971	79.319	BOTH	1.71697
NC_002754	2644191	2645294	-	SSO2892	130.349	79.0039	BOTH	1.64991
NC_002754	2460253	2460654	-	SSO2707	132.79	78.9749	BOTH	1.68142
NC_002754	228987	229523	-	SSO0266	68.5232	78.9567	BOTH	1.15226
NC_002754	244748	246550	-	SSO0287	30.5652	78.8349	BOTH	2.57924
NC_002754	543534	543788	+	SSO6264	99.5886	78.6612	BOTH	1.26605
NC_002754	768342	768863	+	SSO0903	56.9233	78.5754	BOTH	1.38037
NC_002754	2411865	2412356	-	SSO2652	30.0216	78.4462	BOTH	2.61299
NC_002754	313213	313614	-	SSO0368	161.797	78.2867	BOTH	2.06673
NC_002754	320846	321364	+	SSO0377	34.1184	78.23	BOTH	2.2929
NC_002754	2044890	2045375	-	SSO2224	78.7354	78.1337	BOTH	1.0077
NC_002754	262804	264048	+	SSO0309	78.0523	78.1121	BOTH	1.00077
NC_002754	1598378	1598818	-	SSO1764	22.5248	78.1076	BOTH	3.46762
NC_002754	2449611	2450486	+	SSO2694	34.7089	78.0109	BOTH	2.24758
NC_002754	307487	308413	+	SSO0362	79.8553	77.9721	BOTH	1.02415
NC_002754	1071441	1072424	+	SSO1238	126.407	77.8838	BOTH	1.62302
NC_002754	1997307	1998119	+	SSO2174	29.1114	77.8454	BOTH	2.67406
NC_002754	549129	550580	+	SSO0635	35.1579	77.8373	BOTH	2.21393
NC_002754	12050	12673	+	SSO0013	97.8672	77.8135	BOTH	1.25771
NC_002754	2289080	2290036	+	SSO2520	60.654	77.7684	BOTH	1.28216
NC_002754	889657	890400	+	SSO1030	52.9413	77.7206	BOTH	1.46805
NC_002754	559954	560547	-	SSO0646	68.0553	77.668	BOTH	1.14125
NC_002754	1705197	1706417	+	SSO1890	30.8442	77.4949	BOTH	2.51246
NC_002754	316920	317429	+	SSO0372	33.3656	77.4406	BOTH	2.32097
NC_002754	555969	559124	+	SSO0641	32.9254	77.3204	BOTH	2.34835
NC_002754	2719813	2720220	+	SSO2976	48.4817	77.1354	BOTH	1.59102
NC_002754	661453	661980	-	SSO0777	31.9009	77.0275	BOTH	2.41459
NC_002754	2184930	2185730	+	SSO2399	44.2134	77.0256	BOTH	1.74213
NC_002754	2078112	2078537	-	SSO2266	27.576	76.9611	BOTH	2.79087
NC_002754	2711847	2712287	-	SSO2967	197.043	76.8529	BOTH	2.5639
NC_002754	1620614	1621045	+	SSO1786	48.7875	76.6928	BOTH	1.57198
NC_002754	903948	904832	-	SSO1045	44.2138	76.5923	BOTH	1.73232
NC_002754	1245343	1245876	+	SSO1397	69.5552	76.5506	BOTH	1.10057
NC_002754	375411	375989	-	SSO0432	45.7997	76.4547	BOTH	1.66933
NC_002754	865035	866441	-	SSO1009	85.0272	76.4432	BOTH	1.11229
NC_002754	2605843	2606196	-	SSO2846	30.5007	76.2016	BOTH	2.49836
NC_002754	238786	239298	+	SSO0280	21.0472	75.9091	BOTH	3.6066
NC_002754	1640455	1641642	+	SSO1810	85.5054	75.8049	BOTH	1.12797
NC_002754	2624903	2626015	-	SSO2871	166.469	75.6928	BOTH	2.19928
NC_002754	53306	54031	-	SSO0064	49.9707	75.5508	BOTH	1.5119
NC_002754	43863	44612	+	SSO0050	78.5463	75.4388	BOTH	1.04119
NC_002754	2187140	2187886	+	SSO2402	17.4606	75.2788	BOTH	4.31135
NC_002754	655295	655744	-	SSO0770	253.567	75.0084	BOTH	3.38051
NC_002754	1639888	1640421	+	SSO1809	72.9521	74.9963	BOTH	1.02802
NC_002754	1001045	1001473	-	SSO1161	47.7192	74.8106	BOTH	1.56772
NC_002754	1759304	1760605	+	SSO1941	53.5383	74.7987	BOTH	1.39711
NC_002754	2376749	2377405	-	SSO2610	48.3821	74.7473	BOTH	1.54494
NC_002754	297116	297589	-	SSO0347	123.006	74.7127	BOTH	1.64639
NC_002754	997810	998610	-	SSO1156	82.0644	74.5214	BOTH	1.10122
NC_002754	1451468	1452040	-	SSO1605	49.7464	74.4789	BOTH	1.49717
NC_002754	2736391	2737575	-	SSO2995	31.5625	74.3624	BOTH	2.35603
NC_002754	363603	365912	-	SSO0421	88.1727	74.3177	BOTH	1.18643
NC_002754	1267917	1268147	-	SSO7998	52.3502	73.9584	BOTH	1.41276
NC_002754	1704103	1705134	-	SSO1889	47.2902	73.9262	BOTH	1.56325
NC_002754	966613	966981	-	SSO1121	44.9446	73.8537	BOTH	1.64322
NC_002754	2707414	2707995	-	SSO2963	34.5808	73.6837	BOTH	2.13077
NC_002754	2386240	2387187	-	SSO2620	55.4896	73.3993	BOTH	1.32276
NC_002754	2023658	2025271	-	SSO2200	30.0235	73.3673	BOTH	2.44366
NC_002754	447894	448625	-	SSO0519	60.2993	73.3252	BOTH	1.21602
NC_002754	788300	789469	+	SSO0928	108.157	73.1876	BOTH	1.4778
NC_002754	2036095	2037138	-	SSO2213	27.9652	73.1427	BOTH	2.61549
NC_002754	743933	745159	-	SSO0872	83.4916	73.0008	BOTH	1.14371
NC_002754	241015	242643	-	SSO0283	198.897	72.7767	BOTH	2.73298
NC_002754	1170115	1172595	-	SSO1334	84.7067	72.6803	BOTH	1.16547
NC_002754	842473	843159	-	SSO0986	30.4271	72.5907	BOTH	2.38572
NC_002754	2590634	2592271	-	SSO2830	53.7357	72.5457	BOTH	1.35005
NC_002754	2194143	2194559	+	SSO2412	39.1497	72.485	BOTH	1.85148
NC_002754	2206363	2206887	-	SSO2428	56.7626	72.3295	BOTH	1.27425
NC_002754	2974651	2975121	-	SSO3230	35.028	71.8109	BOTH	2.0501
NC_002754	254333	255334	-	SSO0298	63.7058	71.6526	BOTH	1.12474
NC_002754	74314	76041	-	SSO0093	59.8846	71.5692	BOTH	1.19512
NC_002754	2616522	2617922	-	SSO2860	164.186	71.4386	BOTH	2.29828
NC_002754	2943527	2944714	-	SSO3198	77.5801	71.4382	BOTH	1.08597
NC_002754	2362611	2363285	-	SSO2598	72.8133	71.3195	BOTH	1.02095
NC_002754	540769	541404	-	SSO0624	74.562	71.1252	BOTH	1.04832
NC_002754	2715783	2716376	+	SSO2972	23.1213	71.0307	BOTH	3.07208
NC_002754	2181923	2184178	-	SSO2398	37.4457	70.7312	BOTH	1.8889
NC_002754	139591	140172	-	SSO0168	240.878	70.7126	BOTH	3.40645
NC_002754	1603595	1604332	-	SSO1772	40.4969	70.6671	BOTH	1.745
NC_002754	1454484	1454690	-	SSO8472	16.6914	70.5041	BOTH	4.22399
NC_002754	2653718	2654299	+	SSO2901	84.0032	70.4749	BOTH	1.19196
NC_002754	2041721	2042788	+	SSO2220	44.8065	70.4629	BOTH	1.5726
NC_002754	2180744	2181439	-	SSO2394	31.523	70.4595	BOTH	2.23518
NC_002754	2519626	2520489	-	SSO2762	118.27	70.4485	BOTH	1.67881
NC_002754	2002689	2003486	+	SSO2179	28.4679	70.381	BOTH	2.4723
NC_002754	1360281	1361546	+	SSO1505	90.1305	70.2603	BOTH	1.28281
NC_002754	202018	202758	+	SSO0233	65.0457	70.1944	BOTH	1.07915
NC_002754	817144	820644	+	SSO0963	89.6099	70.1356	BOTH	1.27767
NC_002754	1542451	1543104	+	SSO1691	56.9249	70.1194	BOTH	1.23179
NC_002754	1680379	1681323	+	SSO1864	78.974	70.1191	BOTH	1.12628
NC_002754	2630800	2631732	-	SSO2878	48.7901	69.9089	BOTH	1.43285
NC_002754	2955990	2957621	-	SSO3210	32.9739	69.549	BOTH	2.10921
NC_002754	570941	572200	+	SSO0661	44.4229	69.3872	BOTH	1.56197
NC_002754	1730726	1731223	-	SSO1912	16.3043	69.3065	BOTH	4.25082
NC_002754	1437080	1437778	+	SSO1591	37.9371	69.1676	BOTH	1.82322
NC_002754	1634300	1634713	+	SSO1804	45.2754	69.1676	BOTH	1.52771
NC_002754	413903	415324	-	SSO0480	30.8579	69.0217	BOTH	2.23676
NC_002754	633839	634552	-	SSO0747	50.8105	68.877	BOTH	1.35557
NC_002754	142612	143181	+	SSO0171	72.8908	68.5608	BOTH	1.06315
NC_002754	1603299	1603598	-	SSO1769	45.2044	68.4759	BOTH	1.51481
NC_002754	1827452	1827823	+	SSO2013	91.4862	68.4238	BOTH	1.33705
NC_002754	1458558	1459364	-	SSO1611	20.7649	68.3962	BOTH	3.29383
NC_002754	1646872	1648302	+	SSO1816	29.6377	68.3942	BOTH	2.30768
NC_002754	242664	243029	-	SSO0284	96.9981	68.2227	BOTH	1.42179
NC_002754	1512757	1513338	+	SSO1658	18.9972	68.2168	BOTH	3.59089
NC_002754	2768103	2769890	-	SSO3021	27.3433	68.007	BOTH	2.48715
NC_002754	2528877	2529503	+	SSO2772	38.1606	67.9541	BOTH	1.78074
NC_002754	835237	835521	+	SSO6904	92.4395	67.9541	BOTH	1.36032
NC_002754	1050458	1050913	-	SSO1210	41.4841	67.8024	BOTH	1.63442
NC_002754	2910849	2911883	-	SSO3161	107.242	67.6973	BOTH	1.58414
NC_002754	2508253	2510007	-	SSO2754	33.4191	67.4729	BOTH	2.01899
NC_002754	2951576	2952409	+	SSO3205	74.3637	67.4259	BOTH	1.10289
NC_002754	2571427	2572662	+	SSO2811	29.2119	67.2649	BOTH	2.30265
NC_002754	1751338	1751796	+	SSO1931	78.474	67.0579	BOTH	1.17024
NC_002754	955002	956138	+	SSO1103	259.437	66.9776	BOTH	3.8735
NC_002754	702575	703540	-	SSO0820	83.0694	66.9479	BOTH	1.24081
NC_002754	1787734	1788111	-	SSO1975	74.9522	66.7888	BOTH	1.12223
NC_002754	97075	98595	-	SSO0119	16.2988	66.7574	BOTH	4.09585
NC_002754	565312	566070	-	SSO0654	70.1038	66.7071	BOTH	1.05092
NC_002754	2132280	2133047	+	SSO2332	104.598	66.3757	BOTH	1.57585
NC_002754	2730188	2730796	-	SSO2987	37.1609	66.3282	BOTH	1.78489
NC_002754	1665410	1666546	+	SSO1839	48.089	66.3084	BOTH	1.37887
NC_002754	1072414	1072989	+	SSO1240	41.0895	66.1655	BOTH	1.61028
NC_002754	2769914	2772109	-	SSO3022	32.844	66.1439	BOTH	2.01388
NC_002754	996526	997824	+	SSO1155	28.7926	66.1325	BOTH	2.29686
NC_002754	1689573	1690343	-	SSO1876	102.063	66.1174	BOTH	1.54366
NC_002754	1196495	1196905	-	SSO1360	23.9588	65.8018	BOTH	2.74645
NC_002754	542822	543523	+	SSO0626	83.917	65.6205	BOTH	1.27882
NC_002754	902135	903010	-	SSO1043	76.0243	65.2197	BOTH	1.16567
NC_002754	2984729	2985496	+	SSO3241	49.1499	65.2049	BOTH	1.32665
NC_002754	1841137	1841667	+	SSO2026	33.6727	65.1295	BOTH	1.93419
NC_002754	1292310	1293857	-	SSO1440	27.1186	65.1015	BOTH	2.40062
NC_002754	343869	346610	-	SSO0394	40.2278	65.0811	BOTH	1.61782
NC_002754	2187883	2189076	+	SSO2404	30.5289	64.8229	BOTH	2.12333
NC_002754	1036421	1037674	-	SSO1193	20.9401	64.5895	BOTH	3.08449
NC_002754	2626555	2627742	-	SSO2874	109.426	64.568	BOTH	1.69475
NC_002754	2526654	2527580	+	SSO2769	25.7177	64.5415	BOTH	2.50962
NC_002754	2973740	2974393	-	SSO3228	66.8306	64.5141	BOTH	1.03591
NC_002754	1978700	1979764	+	SSO2153	137.799	64.1667	BOTH	2.14752
NC_002754	1772463	1773191	+	SSO1954	29.622	63.8543	BOTH	2.15563
NC_002754	106161	107822	-	SSO0127	127.124	63.5909	BOTH	1.99909
NC_002754	2217271	2218257	+	SSO2441	46.9083	63.5613	BOTH	1.35501
NC_002754	1159034	1160713	-	SSO1328	15.1675	63.4036	BOTH	4.18022
NC_002754	1511957	1512196	+	SSO8620	17.2756	63.4036	BOTH	3.67013
NC_002754	2883400	2884029	+	SSO3132	55.5286	63.2389	BOTH	1.13885
NC_002754	940676	941482	+	SSO1083	57.7993	63.1679	BOTH	1.09288
NC_002754	430925	432187	-	SSO0499	33.7852	63.034	BOTH	1.86573
NC_002754	2420871	2421629	+	SSO2664	46.091	62.9707	BOTH	1.36623
NC_002754	1275779	1276312	+	SSO1421	30.8955	62.9503	BOTH	2.03753
NC_002754	2329562	2329939	+	SSO2556	71.753	62.9462	BOTH	1.13991
NC_002754	889	2091	+	SSO0002	52.4873	62.9005	BOTH	1.1984
NC_002754	1666519	1667571	+	SSO1840	55.2064	62.8617	BOTH	1.13867
NC_002754	1400951	1401979	-	SSO1552	108.035	62.7146	BOTH	1.72265
NC_002754	2991448	2992245	+	SSO12256	32.6894	62.4935	BOTH	1.91174
NC_002754	1156629	1158419	-	SSO1327	29.082	62.4864	BOTH	2.14863
NC_002754	666652	667260	-	SSO0784	87.7962	62.4666	BOTH	1.40549
NC_002754	1437748	1439055	-	SSO1593	13.2076	62.4518	BOTH	4.72846
NC_002754	1641643	1642833	-	SSO1811	42.9351	62.1986	BOTH	1.44866
NC_002754	262008	262835	+	SSO0308	38.8074	61.5658	BOTH	1.58644
NC_002754	2203577	2205262	-	SSO2425	28.6389	61.537	BOTH	2.14872
NC_002754	596120	596539	-	SSO0690	62.9324	61.4274	BOTH	1.0245
NC_002754	2882436	2883335	-	SSO3131	50.867	61.4054	BOTH	1.20718
NC_002754	1189954	1191945	-	SSO1353	33.866	61.355	BOTH	1.8117
NC_002754	515500	516024	-	SSO0588	80.9484	61.2627	BOTH	1.32133
NC_002754	460955	462184	-	SSO0531	33.4978	61.2386	BOTH	1.82814
NC_002754	512873	513745	-	SSO0584	43.8321	61.0069	BOTH	1.39183
NC_002754	71195	72679	-	SSO0090	84.9237	60.9234	BOTH	1.39394
NC_002754	1934808	1935950	-	SSO2111	105.951	60.8772	BOTH	1.7404
NC_002754	135566	136354	+	SSO0163	67.1098	60.8394	BOTH	1.10306
NC_002754	738414	739154	+	SSO0863	82.0648	60.7667	BOTH	1.35049
NC_002754	918081	918722	-	SSO1059	126.876	60.6563	BOTH	2.09172
NC_002754	510845	511822	+	SSO0582	47.5167	60.61	BOTH	1.27555
NC_002754	1439192	1439734	-	SSO1594	27.0428	60.5057	BOTH	2.23741
NC_002754	397123	397767	-	SSO0463	251.768	60.4814	BOTH	4.16273
NC_002754	1856348	1857844	+	SSO2041	50.7189	60.3426	BOTH	1.18975
NC_002754	110094	110804	-	SSO0131	66.0894	60.3149	BOTH	1.09574
NC_002754	878898	879254	-	SSO1020	61.9404	60.2552	BOTH	1.02797
NC_002754	11143	11760	+	SSO0012	44.8662	60.2138	BOTH	1.34208
NC_002754	2502319	2503128	+	SSO2748	60.6778	60.2014	BOTH	1.00791
NC_002754	2734443	2734649	+	SSO11637	39.642	60.1457	BOTH	1.51722
NC_002754	755751	756056	+	SSO0887	28.7926	60.1261	BOTH	2.08825
NC_002754	2344828	2345217	-	SSO2573	95.6801	60.1226	BOTH	1.59142
NC_002754	2388350	2388715	-	SSO2622	39.8849	60.0964	BOTH	1.50675
NC_002754	2215993	2217270	+	SSO2440	32.7803	59.9669	BOTH	1.82936
NC_002754	966101	966616	-	SSO1120	80.0167	59.9184	BOTH	1.33543
NC_002754	890439	891647	+	SSO1031	114.527	59.8995	BOTH	1.91199
NC_002754	474274	475011	-	SSO0544	39.0924	59.889	BOTH	1.53199
NC_002754	1659285	1659863	-	SSO1830	31.3288	59.8497	BOTH	1.91037
NC_002754	2617972	2618415	-	SSO2861	48.4416	59.6648	BOTH	1.23168
NC_002754	613532	616492	-	SSO0722	56.4767	59.5434	BOTH	1.0543
NC_002754	450009	450920	-	SSO0522	51.3342	59.5357	BOTH	1.15977
NC_002754	2764032	2765183	+	SSO3017	17.2456	59.4409	BOTH	3.44673
NC_002754	2215007	2215795	+	SSO2439	14.5605	59.2614	BOTH	4.07001
NC_002754	797721	798959	+	SSO0939	104.086	59.119	BOTH	1.76061
NC_002754	2092022	2093347	+	SSO2283	29.0532	58.9959	BOTH	2.03062
NC_002754	246892	247233	-	SSO0288	24.7515	58.8531	BOTH	2.37775
NC_002754	2170481	2171119	+	SSO2384	30.8203	58.5597	BOTH	1.90004
NC_002754	507602	509320	-	SSO0579	108.688	58.4645	BOTH	1.85905
NC_002754	88678	89373	+	SSO0109	55.8478	58.1365	BOTH	1.04098
NC_002754	1802590	1805727	+	SSO1991	78.2576	57.9703	BOTH	1.34996
NC_002754	2397387	2397809	-	SSO2634	161.729	57.8849	BOTH	2.79397
NC_002754	922767	923243	+	SSO1064	49.2553	57.7122	BOTH	1.17169
NC_002754	2748748	2750541	+	SSO3007	37.7963	57.6782	BOTH	1.52603
NC_002754	630846	632051	+	SSO0743	57.3704	57.4102	BOTH	1.00069
NC_002754	2080157	2080678	-	SSO2269	17.0439	57.2421	BOTH	3.35851
NC_002754	35370	35828	+	SSO0040	26.158	57.1122	BOTH	2.18336
NC_002754	1601950	1603074	+	SSO1768	28.1784	57.0556	BOTH	2.0248
NC_002754	809187	809867	+	SSO0954	46.1697	56.9795	BOTH	1.23413
NC_002754	475014	475874	-	SSO0545	34.6113	56.7961	BOTH	1.64097
NC_002754	1910950	1913148	+	SSO2095	18.9332	56.7747	BOTH	2.99868
NC_002754	1994295	1995482	-	SSO2170	49.9508	56.7081	BOTH	1.13528
NC_002754	2193650	2194153	+	SSO2411	38.2188	56.679	BOTH	1.48301
NC_002754	1472103	1473362	+	SSO1622	44.0801	56.5417	BOTH	1.2827
NC_002754	2315129	2315824	+	SSO2546	97.5474	56.4471	BOTH	1.72812
NC_002754	582563	583798	+	SSO0679	41.3719	56.4085	BOTH	1.36345
NC_002754	1931907	1933070	-	SSO2110	42.0758	56.2729	BOTH	1.33742
NC_002754	2486527	2487444	-	SSO2732	35.0028	56.2081	BOTH	1.60582
NC_002754	2525637	2526242	-	SSO2768	58.7255	56.1559	BOTH	1.04576
NC_002754	2067142	2068644	-	SSO2251	58.9645	56.144	BOTH	1.05024
NC_002754	1296030	1296641	-	SSO1444	42.9066	56.0574	BOTH	1.3065
NC_002754	863102	864232	+	SSO1007	80.1153	55.9579	BOTH	1.43171
NC_002754	399141	401654	+	SSO0466	17.5573	55.7963	BOTH	3.17795
NC_002754	2065994	2067139	-	SSO2250	36.7822	55.7686	BOTH	1.51619
NC_002754	2657556	2658920	+	SSO2907	25.2489	55.6888	BOTH	2.20559
NC_002754	1348773	1349345	+	SSO1495	110.95	55.6479	BOTH	1.99378
NC_002754	2423246	2423854	+	SSO2667	38.0119	55.5385	BOTH	1.46108
NC_002754	1435680	1436033	+	SSO1589	21.2285	55.4904	BOTH	2.61396
NC_002754	646857	647078	-	SSO6468	55.2507	55.4587	BOTH	1.00376
NC_002754	901697	902134	+	SSO1042	111.423	55.4288	BOTH	2.01021
NC_002754	2438416	2440404	-	SSO2679	84.0328	55.3967	BOTH	1.51693
NC_002754	313601	314965	-	SSO0369	47.144	55.3847	BOTH	1.1748
NC_002754	138497	139618	-	SSO0167	107.857	55.2971	BOTH	1.9505
NC_002754	2047756	2048640	+	SSO2228	62.3677	55.0996	BOTH	1.13191
NC_002754	2934749	2935120	-	SSO3188	23.9164	55.0366	BOTH	2.3012
NC_002754	1638947	1639645	-	SSO1808	75.3798	55.0174	BOTH	1.37011
NC_002754	1578607	1579065	+	SSO1740	58.338	55.0025	BOTH	1.06064
NC_002754	2497535	2498728	+	SSO2743	33.2779	54.9749	BOTH	1.65199
NC_002754	2042766	2043119	-	SSO2221	29.7686	54.9042	BOTH	1.84436
NC_002754	1713563	1714087	-	SSO1899	19.4145	54.8071	BOTH	2.823
NC_002754	84240	84935	+	SSO0102	74.5878	54.7577	BOTH	1.36214
NC_002754	647431	647658	+	SSO6469	26.8984	54.606	BOTH	2.03009
NC_002754	27944	28660	+	SSO0031	89.3896	54.5044	BOTH	1.64004
NC_002754	2077175	2078122	-	SSO2265	20.9567	54.5023	BOTH	2.60072
NC_002754	1878836	1879951	+	SSO2060	44.6595	54.2928	BOTH	1.21571
NC_002754	2595288	2595671	+	SSO2833	47.6878	54.2173	BOTH	1.13692
NC_002754	2881292	2882446	-	SSO3130	62.6707	54.1962	BOTH	1.15637
NC_002754	82518	84152	+	SSO0101	65.0872	54.1918	BOTH	1.20105
NC_002754	717064	718473	+	SSO0837	29.8341	54.0586	BOTH	1.81198
NC_002754	543785	544459	+	SSO0628	75.7566	53.797	BOTH	1.40819
NC_002754	2589077	2589493	-	SSO2828	97.1492	53.7417	BOTH	1.80771
NC_002754	435745	438549	+	SSO0504	27.5608	53.6819	BOTH	1.94776
NC_002754	1039799	1040275	+	SSO1197	62.2935	53.652	BOTH	1.16107
NC_002754	899337	900575	-	SSO1039	54.936	53.6481	BOTH	1.02401
NC_002754	319315	320832	+	SSO0376	7.45422	53.5388	BOTH	7.18235
NC_002754	2447407	2447808	+	SSO2691	30.5116	53.5102	BOTH	1.75377
NC_002754	456133	456918	+	SSO0526	31.1004	53.4157	BOTH	1.71752
NC_002754	1675627	1676370	-	SSO1858	88.932	53.3632	BOTH	1.66654
NC_002754	523517	524713	+	SSO0599	42.0704	53.3347	BOTH	1.26775
NC_002754	2520491	2521219	-	SSO2763	81.8753	53.3226	BOTH	1.53547
NC_002754	1124400	1124699	+	SSO1296	244.161	53.0285	BOTH	4.60435
NC_002754	514553	515524	+	SSO0586	57.3186	53.0142	BOTH	1.08119
NC_002754	1694683	1695507	-	SSO1880	20.8354	52.9866	BOTH	2.5431
NC_002754	2131092	2131862	+	SSO2331	81.0002	52.8401	BOTH	1.53293
NC_002754	1730365	1730715	+	SSO1910	38.8823	52.4176	BOTH	1.34811
NC_002754	1267334	1267870	+	SSO1414	35.7093	52.2943	BOTH	1.46445
NC_002754	381851	382255	-	SSO0441	42.869	52.2599	BOTH	1.21906
NC_002754	1876243	1876875	+	SSO2058	95.2476	52.0123	BOTH	1.83125
NC_002754	2299078	2299446	-	SSO2529	48.924	51.9225	BOTH	1.06129
NC_002754	150044	150952	+	SSO0179	51.7887	51.8947	BOTH	1.00205
NC_002754	349404	350543	-	SSO0398	41.9008	51.8757	BOTH	1.23806
NC_002754	2722378	2723340	+	SSO2979	33.5465	51.7859	BOTH	1.5437
NC_002754	225253	226020	-	SSO0259	31.1545	51.6956	BOTH	1.65933
NC_002754	1454687	1455124	-	SSO1608	10.8465	51.6388	BOTH	4.76086
NC_002754	412196	413338	+	SSO0478	14.5852	51.6185	BOTH	3.53909
NC_002754	2729405	2729707	-	SSO2986	43.0464	51.5903	BOTH	1.19848
NC_002754	1770644	1771825	+	SSO1952	54.7352	51.5538	BOTH	1.06171
NC_002754	539774	540166	-	SSO0621	58.904	51.2157	BOTH	1.15012
NC_002754	44609	45619	-	SSO0051	50.7502	51.1744	BOTH	1.00836
NC_002754	1842409	1843047	+	SSO2028	19.7358	51.0909	BOTH	2.58875
NC_002754	2735717	2736394	+	SSO2994	30.5762	50.9065	BOTH	1.6649
NC_002754	2638135	2638554	-	SSO2884	38.87	50.8876	BOTH	1.30917
NC_002754	658336	660396	+	SSO0774	132.019	50.8437	BOTH	2.59656
NC_002754	2964929	2965630	-	SSO3217	28.9157	50.8411	BOTH	1.75826
NC_002754	1990523	1990903	-	SSO2164	24.7118	50.8318	BOTH	2.05699
NC_002754	547921	549135	+	SSO0633	29.077	50.7229	BOTH	1.74443
NC_002754	2134090	2134554	-	SSO2337	18.9474	50.4254	BOTH	2.66134
NC_002754	562244	562795	-	SSO0649	18.1519	50.372	BOTH	2.77503
NC_002754	1375603	1376841	+	SSO1524	64.278	50.3544	BOTH	1.27651
NC_002754	761575	762321	+	SSO0895	46.3688	50.0933	BOTH	1.08032
NC_002754	155103	155984	+	SSO0183	30.4575	49.9544	BOTH	1.64013
NC_002754	1312127	1312546	-	SSO1456	30.0266	49.8995	BOTH	1.66184
NC_002754	1996402	1997316	+	SSO2172	20.7684	49.8914	BOTH	2.40227
NC_002754	2303254	2304297	+	SSO2536	51.7936	49.7556	BOTH	1.04096
NC_002754	2985858	2986814	+	SSO3243	15.6148	49.7255	BOTH	3.18451
NC_002754	1364187	1364927	-	SSO1510	80.0831	49.6588	BOTH	1.61267
NC_002754	938924	940120	+	SSO1080	35.1429	49.6365	BOTH	1.41242
NC_002754	371931	372701	+	SSO0427	27.4482	49.6105	BOTH	1.80742
NC_002754	2349524	2349904	+	SSO2579	29.9262	49.561	BOTH	1.65611
NC_002754	2631764	2632567	-	SSO2879	61.8826	49.4669	BOTH	1.25099
NC_002754	2730848	2731819	+	SSO2988	24.7048	49.3851	BOTH	1.99901
NC_002754	2982208	2984340	+	SSO3239	52.3613	49.2896	BOTH	1.06232
NC_002754	2504398	2505747	-	SSO2750	30.9041	49.2883	BOTH	1.59488
NC_002754	274562	275344	+	SSO0321	15.334	49.0268	BOTH	3.19726
NC_002754	1465989	1466684	+	SSO1617	26.6828	48.9937	BOTH	1.83615
NC_002754	1847556	1848455	+	SSO2033	26.9691	48.9553	BOTH	1.81524
NC_002754	576091	576729	-	SSO0669	71.6436	48.926	BOTH	1.46432
NC_002754	2530455	2532050	-	SSO2774	22.7851	48.712	BOTH	2.13789
NC_002754	2445401	2446762	+	SSO2689	17.821	48.7017	BOTH	2.73283
NC_002754	2734689	2735147	+	SSO2992	29.169	48.6735	BOTH	1.66867
NC_002754	575760	576098	-	SSO0668	69.3061	48.5601	BOTH	1.42722
NC_002754	2955190	2955987	-	SSO3209	55.5286	48.5387	BOTH	1.14401
NC_002754	1498101	1499135	+	SSO1646	69.1857	48.5175	BOTH	1.42599
NC_002754	895429	896043	-	SSO1034	23.8768	48.4735	BOTH	2.03015
NC_002754	1141772	1142557	-	SSO1312	6.59373	48.3997	BOTH	7.34026
NC_002754	2744889	2745788	-	SSO3004	68.1425	48.3405	BOTH	1.40964
NC_002754	2326298	2327317	-	SSO2553	148.536	48.0104	BOTH	3.09383
NC_002754	235569	236009	-	SSO0276	27.0298	47.9938	BOTH	1.77559
NC_002754	2359681	2360061	-	SSO2594	36.5009	47.9271	BOTH	1.31304
NC_002754	2908209	2908952	-	SSO3157	260.643	47.8781	BOTH	5.44389
NC_002754	1393123	1393971	+	SSO1540	42.6294	47.8226	BOTH	1.12182
NC_002754	2073102	2073911	+	SSO2257	14.183	47.8196	BOTH	3.3716
NC_002754	1167837	1168136	-	SSO1332	24.1858	47.7256	BOTH	1.97329
NC_002754	2533143	2533412	-	SSO11114	63.3438	47.6488	BOTH	1.32939
NC_002754	921818	922732	-	SSO1063	40.9705	47.3968	BOTH	1.15685
NC_002754	2709181	2710980	+	SSO2965	18.5233	47.2261	BOTH	2.54956
NC_002754	2984344	2984802	+	SSO3240	46.6704	47.1666	BOTH	1.01063
NC_002754	1070594	1070887	-	SSO7469	44.0703	46.8175	BOTH	1.06234
NC_002754	732720	733019	+	SSO0853	140.508	46.8034	BOTH	3.00209
NC_002754	1777542	1778315	-	SSO1962	19.0835	46.7373	BOTH	2.4491
NC_002754	1377377	1378375	+	SSO1525	49.8034	46.7348	BOTH	1.06566
NC_002754	484290	484916	-	SSO0551	56.8964	46.6633	BOTH	1.2193
NC_002754	2020615	2023653	-	SSO2199	19.7256	46.5669	BOTH	2.36073
NC_002754	700409	700750	-	SSO0817	71.9815	46.5162	BOTH	1.54745
NC_002754	422610	423494	+	SSO0490	175.489	46.5025	BOTH	3.77375
NC_002754	867403	868398	-	SSO1010	27.9254	46.4589	BOTH	1.66368
NC_002754	2723326	2723736	-	SSO2980	44.9753	46.4483	BOTH	1.03275
NC_002754	941457	942194	-	SSO1085	55.7125	46.2054	BOTH	1.20576
NC_002754	2099610	2100353	+	SSO2290	19.9691	46.2047	BOTH	2.31381
NC_002754	1940928	1941752	+	SSO2117	15.391	46.1117	BOTH	2.99603
NC_002754	2968706	2969605	+	SSO3220	31.8638	46.1117	BOTH	1.44715
NC_002754	2045582	2045902	-	SSO2225	37.6726	46.1117	BOTH	1.22401
NC_002754	2195006	2196502	-	SSO2415	34.4473	45.8807	BOTH	1.33191
NC_002754	2062387	2063406	-	SSO2248	88.4103	45.8405	BOTH	1.92865
NC_002754	2941689	2942630	-	SSO3195	70.5144	45.7446	BOTH	1.54148
NC_002754	1046762	1047028	-	SSO7412	57.2617	45.5936	BOTH	1.25592
NC_002754	95139	95849	-	SSO0116	31.1009	45.4307	BOTH	1.46075
NC_002754	2456188	2456583	+	SSO2703	41.2258	45.4131	BOTH	1.10157
NC_002754	401626	402570	-	SSO0468	31.9004	45.3798	BOTH	1.42255
NC_002754	561606	562142	-	SSO0648	24.9322	45.3389	BOTH	1.81849
NC_002754	2592469	2594226	-	SSO2831	24.0757	45.3248	BOTH	1.88259
NC_002754	2721225	2722325	-	SSO2978	45.5033	45.295	BOTH	1.0046
NC_002754	260884	262059	+	SSO0307	51.4154	45.2883	BOTH	1.13529
NC_002754	1895792	1896118	+	SSO2080	75.8118	45.2656	BOTH	1.67482
NC_002754	408999	410456	+	SSO0475	39.0418	45.2104	BOTH	1.158
NC_002754	522765	523520	+	SSO0597	35.7623	45.1968	BOTH	1.26381
NC_002754	1773710	1774120	-	SSO1957	21.2267	45.102	BOTH	2.12478
NC_002754	491695	493416	+	SSO0558	56.9833	45.0674	BOTH	1.2644
NC_002754	1541630	1542004	+	SSO1689	37.0849	45.005	BOTH	1.21357
NC_002754	1670734	1671339	+	SSO1845	53.3091	44.9703	BOTH	1.18543
NC_002754	2574657	2574959	-	SSO2814	32.2135	44.7421	BOTH	1.38892
NC_002754	2594590	2595291	+	SSO2832	27.8083	44.5352	BOTH	1.60151
NC_002754	951999	952727	+	SSO1096	45.4994	44.4988	BOTH	1.02249
NC_002754	1590345	1591355	-	SSO1757	29.1344	44.3329	BOTH	1.52167
NC_002754	1560255	1560485	+	SSO8760	21.314	44.3152	BOTH	2.07916
NC_002754	1266753	1267172	+	SSO1413	21.5945	44.3002	BOTH	2.05146
NC_002754	2032422	2033480	+	SSO2209	9.38003	44.2829	BOTH	4.72098
NC_002754	2444148	2444459	+	SSO2687	16.888	44.1165	BOTH	2.6123
NC_002754	466421	466963	-	SSO0538	25.1339	44.0736	BOTH	1.75355
NC_002754	1903244	1904257	+	SSO2090	21.2111	43.9289	BOTH	2.07103
NC_002754	2626022	2626558	-	SSO2872	97.9592	43.9221	BOTH	2.2303
NC_002754	1243384	1243728	+	SSO1395	15.2726	43.9064	BOTH	2.87484
NC_002754	1194841	1195527	+	SSO1357	38.5997	43.8967	BOTH	1.13723
NC_002754	566143	566694	+	SSO0655	24.2547	43.8563	BOTH	1.80816
NC_002754	2149856	2150650	+	SSO2355	29.1186	43.7626	BOTH	1.50291
NC_002754	131130	131924	+	SSO0156	28.5753	43.6756	BOTH	1.52844
NC_002754	1870810	1871598	-	SSO2052	13.6847	43.4818	BOTH	3.1774
NC_002754	432474	433139	+	SSO0500	60.698	43.4115	BOTH	1.3982
NC_002754	525694	525951	+	SSO6227	33.8146	43.1627	BOTH	1.27645
NC_002754	544450	546579	+	SSO0629	46.7981	43.0917	BOTH	1.08601
NC_002754	1662548	1662928	+	SSO1835	36.9543	42.844	BOTH	1.15938
NC_002754	663613	664182	+	SSO0780	65.0107	42.8354	BOTH	1.51769
NC_002754	546572	547924	+	SSO0632	31.474	42.7888	BOTH	1.3595
NC_002754	1754545	1755378	+	SSO1936	16.6749	42.6285	BOTH	2.55645
NC_002754	259048	260112	+	SSO0305	29.0359	42.6046	BOTH	1.46731
NC_002754	64034	66328	-	SSO0081	40.2344	42.5855	BOTH	1.05844
NC_002754	891622	892419	+	SSO1032	111.598	42.558	BOTH	2.62227
NC_002754	2816852	2817589	+	SSO3061	7.13963	42.5502	BOTH	5.95972
NC_002754	2921283	2922686	+	SSO3175	19.3796	42.5154	BOTH	2.19382
NC_002754	19647	20195	-	SSO0019	27.6913	42.4581	BOTH	1.53327
NC_002754	518925	519524	-	SSO0591	103.653	42.4228	BOTH	2.44334
NC_002754	1937245	1938825	-	SSO2113	46.8222	42.3493	BOTH	1.10562
NC_002754	1446518	1448023	+	SSO1600	10.955	42.3456	BOTH	3.86543
NC_002754	2879278	2879523	-	SSO12018	14.3963	42.1754	BOTH	2.92959
NC_002754	584670	585737	+	SSO0681	38.9024	42.1611	BOTH	1.08377
NC_002754	130070	131128	+	SSO0155	44.2085	42.0622	BOTH	1.05103
NC_002754	2052811	2053461	-	SSO2236	22.4237	41.968	BOTH	1.87159
NC_002754	2407744	2408673	-	SSO2647	112.384	41.9468	BOTH	2.67921
NC_002754	228032	229009	-	SSO0265	45.397	41.7976	BOTH	1.08611
NC_002754	1515235	1516986	-	SSO1662	147.71	41.769	BOTH	3.53636
NC_002754	1443075	1444715	-	SSO1598	31.8982	41.7282	BOTH	1.30817
NC_002754	830094	831437	+	SSO0971	56.5569	41.6858	BOTH	1.35674
NC_002754	1658048	1659307	-	SSO1829	30.6436	41.6103	BOTH	1.35788
NC_002754	17801	19660	+	SSO0018	22.1053	41.4262	BOTH	1.87404
NC_002754	2488487	2489146	-	SSO2733	16.8829	41.3957	BOTH	2.45193
NC_002754	679721	680596	-	SSO0795	38.4559	41.2953	BOTH	1.07383
NC_002754	963442	964488	+	SSO1117	37.0427	41.2891	BOTH	1.11464
NC_002754	1035783	1036424	-	SSO1192	21.2581	41.2635	BOTH	1.94107
NC_002754	1183991	1184653	+	SSO1346	46.3809	41.2084	BOTH	1.12552
NC_002754	218719	219279	+	SSO0253	37.8769	41.18	BOTH	1.08721
NC_002754	2680676	2681011	-	SSO2937	46.2739	41.1712	BOTH	1.12394
NC_002754	111846	112274	+	SSO0133	45.9071	41.1136	BOTH	1.11659
NC_002754	1782460	1782846	-	SSO1968	22.0967	41.1073	BOTH	1.86034
NC_002754	2918803	2919381	+	SSO3171	42.816	41.0944	BOTH	1.04189
NC_002754	1474711	1476120	+	SSO1624	30.0178	41.0591	BOTH	1.36782
NC_002754	666288	666677	-	SSO0783	73.5319	40.9685	BOTH	1.79484
NC_002754	539379	539696	-	SSO0620	121.146	40.8915	BOTH	2.96263
NC_002754	2911880	2913283	-	SSO3163	39.0054	40.7911	BOTH	1.04578
NC_002754	318365	319240	-	SSO0375	22.6791	40.7425	BOTH	1.79648
NC_002754	1210170	1212011	+	SSO1375	33.4351	40.6669	BOTH	1.2163
NC_002754	2811643	2812542	+	SSO3056	27.0651	40.6552	BOTH	1.50213
NC_002754	655982	657223	-	SSO0771	60.2976	40.5984	BOTH	1.48522
NC_002754	2050090	2050752	-	SSO2231	25.7961	40.5825	BOTH	1.5732
NC_002754	1904282	1906378	+	SSO2091	107.179	40.4055	BOTH	2.6526
NC_002754	1577010	1577282	-	SSO8813	32.9059	40.2844	BOTH	1.22423
NC_002754	1047747	1049813	+	SSO1209	64.0207	40.2557	BOTH	1.59035
NC_002754	49815	50180	-	SSOr01	218.541	40.2533	BOTH	5.42914
NC_002754	628750	629181	-	SSO0739	67.5827	40.1876	BOTH	1.68168
NC_002754	554869	555972	+	SSO0640	26.0542	40.1598	BOTH	1.54139
NC_002754	2750583	2751812	+	SSO3008	47.0514	40.1509	BOTH	1.17186
NC_002754	407678	409012	+	SSO0473	28.275	40.0498	BOTH	1.41644
NC_002754	2656137	2656970	-	SSO2905	5.69638	39.9745	BOTH	7.01753
NC_002754	124663	125556	+	SSO0147	47.4402	39.8449	BOTH	1.19062
NC_002754	2205318	2205746	+	SSO2426	23.5576	39.6625	BOTH	1.68364
NC_002754	1710446	1711084	-	SSO1896	24.3318	39.5089	BOTH	1.62375
NC_002754	1011604	1014312	+	SSO1172	28.1549	39.4988	BOTH	1.40291
NC_002754	380629	381177	-	SSO0439	30.5233	39.4343	BOTH	1.29194
NC_002754	1758106	1759269	+	SSO1939	5.34296	39.3376	BOTH	7.36251
NC_002754	1889747	1890490	-	SSO2072	10.9133	39.3251	BOTH	3.6034
NC_002754	835585	836970	+	SSO0977	25.0533	39.2748	BOTH	1.56765
NC_002754	451340	451531	-	SSO6024	22.9441	39.267	BOTH	1.71142
NC_002754	2638613	2639527	-	SSO2885	73.256	39.2328	BOTH	1.86721
NC_002754	315002	315880	+	SSO0370	20.4398	39.1084	BOTH	1.91334
NC_002754	2887379	2888815	-	SSO3139	28.8527	39.0843	BOTH	1.35461
NC_002754	1642893	1643492	-	SSO1812	30.5202	39.0797	BOTH	1.28045
NC_002754	1344571	1345083	+	SSO1489	43.2731	38.9658	BOTH	1.11054
NC_002754	2287042	2288103	+	SSO2518	46.2797	38.8823	BOTH	1.19025
NC_002754	2527607	2528839	+	SSO2770	18.4945	38.8752	BOTH	2.10198
NC_002754	137128	138063	+	SSO0166	34.2374	38.722	BOTH	1.13099
NC_002754	443316	443687	-	SSO0510	31.8112	38.6743	BOTH	1.21575
NC_002754	715707	716276	+	SSO0834	98.3495	38.5882	BOTH	2.54869
NC_002754	94607	95191	-	SSO0115	15.3561	38.5447	BOTH	2.51006
NC_002754	799669	800085	+	SSO0941	52.821	38.4817	BOTH	1.37263
NC_002754	2088	2969	+	SSO0004	32.3182	38.4264	BOTH	1.189
NC_002754	1644442	1644786	-	SSO1813	28.7926	38.2928	BOTH	1.32995
NC_002754	1621252	1621977	+	SSO1787	64.248	38.2041	BOTH	1.6817
NC_002754	1960696	1962195	+	SSO2133	15.0297	38.1805	BOTH	2.54033
NC_002754	2422875	2423348	+	SSO2666	5.64918	38.0859	BOTH	6.74185
NC_002754	2632768	2633439	+	SSO2880	64.5263	38.0833	BOTH	1.69435
NC_002754	778428	778736	+	SSO0914	43.3287	38.0534	BOTH	1.13863
NC_002754	53977	54699	-	SSO0065	33.0936	37.98	BOTH	1.14765
NC_002754	490710	491633	-	SSO0557	39.0757	37.9523	BOTH	1.0296
NC_002754	1452325	1453128	+	SSO1606	38.5692	37.9389	BOTH	1.01661
NC_002754	2440385	2441932	-	SSO2680	35.4886	37.9349	BOTH	1.06893
NC_002754	1090286	1091146	-	SSO1266	6.11969	37.757	BOTH	6.16976
NC_002754	2429142	2430116	+	SSO2672	30.5645	37.6697	BOTH	1.23247
NC_002754	2724868	2725080	+	SSO11614	39.3364	37.6687	BOTH	1.04427
NC_002754	2442422	2442811	-	SSO2683	45.8467	37.4214	BOTH	1.22515
NC_002754	1657250	1657837	-	SSO1827	29.0864	37.2893	BOTH	1.28202
NC_002754	1140958	1141761	-	SSO1311	11.8179	37.2507	BOTH	3.15207
NC_002754	2507711	2508253	-	SSO2753	41.2005	37.1951	BOTH	1.10769
NC_002754	321348	322277	-	SSO0378	20.9907	37.1125	BOTH	1.76804
NC_002754	1058964	1059650	-	SSO1219	44.6348	37.0505	BOTH	1.2047
NC_002754	2428073	2429161	+	SSO2670	22.5265	36.9656	BOTH	1.64099
NC_002754	1930061	1930384	-	SSO2108	16.7957	36.9321	BOTH	2.1989
NC_002754	2915194	2916072	-	SSO3166	14.1506	36.8264	BOTH	2.60246
NC_002754	1283307	1283927	+	SSO1430	40.8939	36.7557	BOTH	1.11259
NC_002754	2535490	2536368	-	SSO2779	17.3935	36.7477	BOTH	2.11273
NC_002754	2876706	2878655	-	SSO3127	37.519	36.7475	BOTH	1.02099
NC_002754	2179413	2180783	-	SSO2393	31.3758	36.7279	BOTH	1.17058
NC_002754	20199	21008	-	SSO0020	8.74443	36.7186	BOTH	4.19909
NC_002754	1149931	1150824	-	SSO1319	30.2419	36.6727	BOTH	1.21265
NC_002754	1224793	1225251	+	SSO1384	22.7706	36.6181	BOTH	1.60813
NC_002754	550574	551545	+	SSO0636	34.1246	36.5051	BOTH	1.06976
NC_002754	1198519	1199217	+	SSO1363	69.0776	36.4144	BOTH	1.89698
NC_002754	618401	619867	+	SSO0725	18.9596	36.3519	BOTH	1.91734
NC_002754	2098820	2099599	+	SSO2289	20.8193	36.2686	BOTH	1.74207
NC_002754	1332122	1332589	-	SSO1471	24.9167	36.2095	BOTH	1.45322
NC_002754	2288111	2289037	-	SSO2519	15.6542	36.1134	BOTH	2.30694
NC_002754	2430019	2431206	+	SSO2673	20.5765	36.0393	BOTH	1.75148
NC_002754	2393230	2393592	+	SSO2628	10.708	36.0129	BOTH	3.36317
NC_002754	998656	999297	-	SSO1157	43.7271	35.9844	BOTH	1.21517
NC_002754	1228221	1231316	+	SSO1388	49.6617	35.8796	BOTH	1.38412
NC_002754	217690	218709	-	SSO0252	18.5458	35.8722	BOTH	1.93425
NC_002754	2966938	2967834	-	SSO3218	42.563	35.8561	BOTH	1.18705
NC_002754	772004	774010	+	SSO0907	130.449	35.8417	BOTH	3.63959
NC_002754	2948037	2949995	+	SSO3203	16.9316	35.7313	BOTH	2.11033
NC_002754	1831629	1832441	-	SSO2017	8.8184	35.6473	BOTH	4.04237
NC_002754	2922727	2923095	+	SSO3176	37.2197	35.6147	BOTH	1.04507
NC_002754	900535	901119	-	SSO1040	17.2756	35.5888	BOTH	2.06006
NC_002754	158520	159971	+	SSO0186	28.1977	35.5841	BOTH	1.26195
NC_002754	903007	903951	-	SSO1044	34.8254	35.5719	BOTH	1.02144
NC_002754	1805724	1806668	+	SSO1992	48.3533	35.4255	BOTH	1.36493
NC_002754	668738	670138	+	SSO0786	25.5866	35.349	BOTH	1.38155
NC_002754	1832442	1833212	-	SSO2018	7.05811	35.3463	BOTH	5.0079
NC_002754	2691718	2692443	+	SSO2946	35.6933	35.346	BOTH	1.00983
NC_002754	2772494	2773108	+	SSO3023	22.4723	35.2024	BOTH	1.56648
NC_002754	1289656	1290519	-	SSO1437	16.4958	35.1442	BOTH	2.1305
NC_002754	285759	286874	-	SSO0333	24.0712	35.1416	BOTH	1.4599
NC_002754	1324545	1325180	-	SSO1465	96.1565	35.1276	BOTH	2.73735
NC_002754	1830357	1831514	-	SSO2015	34.1633	35.1214	BOTH	1.02804
NC_002754	650696	651892	+	SSO0765	29.5142	35.075	BOTH	1.18841
NC_002754	1038738	1039328	+	SSO1196	18.7079	34.8764	BOTH	1.86426
NC_002754	965645	966097	+	SSO1118	66.9285	34.8128	BOTH	1.92253
NC_002754	2100345	2102009	-	SSO2291	13.1772	34.7292	BOTH	2.63556
NC_002754	2484459	2485367	+	SSO2729	31.2633	34.5457	BOTH	1.10499
NC_002754	1999829	2000383	-	SSO2176	17.1199	34.5215	BOTH	2.01645
NC_002754	1629186	1629626	-	SSO1800	20.1744	34.5054	BOTH	1.71035
NC_002754	2283385	2284317	-	SSO2515	9.99872	34.4726	BOTH	3.4477
NC_002754	1126665	1127120	-	SSO1298	74.2546	34.4321	BOTH	2.15655
NC_002754	986048	987337	+	SSO1145	27.1186	34.3693	BOTH	1.26737
NC_002754	540202	540831	+	SSO0622	47.8506	34.3642	BOTH	1.39245
NC_002754	920502	921533	+	SSO1062	87.6333	34.3157	BOTH	2.55374
NC_002754	1251428	1252072	+	SSO1403	24.2394	34.3157	BOTH	1.4157
NC_002754	1226116	1226862	-	SSO1386	21.1608	34.2597	BOTH	1.61901
NC_002754	1695924	1696445	+	SSO1881	34.0878	34.1863	BOTH	1.00289
NC_002754	1386468	1387892	-	SSO1535	39.946	34.1227	BOTH	1.17066
NC_002754	975477	976139	+	SSO1136	11.5952	34.1143	BOTH	2.9421
NC_002754	424521	425558	+	SSO0493	19.8053	33.9841	BOTH	1.71591
NC_002754	1785260	1785772	+	SSO1971	12.46	33.9771	BOTH	2.7269
NC_002754	2403574	2404050	+	SSO2641	15.0301	33.9313	BOTH	2.25755
NC_002754	1070884	1071342	-	SSO1237	35.5674	33.9057	BOTH	1.04901
NC_002754	2034192	2035244	+	SSO2211	26.1677	33.697	BOTH	1.28774
NC_002754	1696452	1696973	+	SSO1882	36.5699	33.6563	BOTH	1.08657
NC_002754	1512162	1512542	+	SSO1657	12.2425	33.5853	BOTH	2.74333
NC_002754	343263	343532	-	SSO5761	68.1425	33.5591	BOTH	2.03052
NC_002754	1441519	1443069	-	SSO1597	24.2816	33.4912	BOTH	1.37928
NC_002754	420471	421244	-	SSO0488	67.8524	33.4221	BOTH	2.03017
NC_002754	956435	956857	-	SSO1105	14.09	33.3574	BOTH	2.36745
NC_002754	2115365	2116315	+	SSO2312	15.7133	33.311	BOTH	2.11992
NC_002754	478181	479362	+	SSO0548	11.0347	33.2964	BOTH	3.01742
NC_002754	2037178	2037543	+	SSO2214	24.7805	33.2609	BOTH	1.34222
NC_002754	2909237	2910094	+	SSO3158	56.6792	33.2133	BOTH	1.70652
NC_002754	249483	249755	-	SSO5576	35.1207	33.1903	BOTH	1.05816
NC_002754	1928975	1929295	+	SSO2107	11.0327	33.1832	BOTH	3.00772
NC_002754	2403261	2403581	+	SSO2640	16.1454	33.1832	BOTH	2.05527
NC_002754	351659	352126	-	SSO0401	45.2192	33.1058	BOTH	1.3659
NC_002754	2665268	2666206	-	SSO2915	18.3059	33.0737	BOTH	1.80673
NC_002754	2668480	2669973	+	SSO2921	19.0216	33.056	BOTH	1.73781
NC_002754	1554089	1554484	+	SSO1708	30.5376	33.0118	BOTH	1.08102
NC_002754	2738911	2740170	-	SSO2998	57.7223	32.9918	BOTH	1.74959
NC_002754	2063403	2065997	-	SSO2249	39.8769	32.8379	BOTH	1.21436
NC_002754	2184160	2184975	+	SSO2397	23.0764	32.719	BOTH	1.41785
NC_002754	2892479	2893825	-	SSO3143	25.7787	32.6582	BOTH	1.26687
NC_002754	2908988	2909233	+	SSO12093	100.072	32.6156	BOTH	3.06822
NC_002754	2967851	2968612	-	SSO3219	19.2707	32.5868	BOTH	1.69101
NC_002754	2489184	2489489	-	SSO2734	22.0179	32.5494	BOTH	1.47832
NC_002754	1870209	1870694	+	SSO2049	14.3963	32.3067	BOTH	2.24409
NC_002754	2299422	2299814	-	SSO2530	27.2541	32.2078	BOTH	1.18176
NC_002754	1021402	1021932	-	SSO1178	26.3526	32.174	BOTH	1.22091
NC_002754	28655	29461	-	SSO0032	37.3555	32.0554	BOTH	1.16534
NC_002754	1040570	1041202	+	SSO1198	41.3467	32.016	BOTH	1.29144
NC_002754	2447805	2449580	-	SSO2693	24.2695	31.9744	BOTH	1.31748
NC_002754	844856	846199	-	SSO0988	20.1163	31.9591	BOTH	1.58872
NC_002754	247569	248924	-	SSO0290	23.8877	31.9313	BOTH	1.33673
NC_002754	2311926	2312876	+	SSO2542	17.8932	31.8564	BOTH	1.78036
NC_002754	884757	885719	-	SSO1026	11.2121	31.7467	BOTH	2.83147
NC_002754	2040871	2041620	-	SSO2219	17.6211	31.7249	BOTH	1.80039
NC_002754	1242456	1243421	+	SSO1393	12.8762	31.7197	BOTH	2.46344
NC_002754	342491	343210	-	SSO0393	72.9413	31.6057	BOTH	2.30785
NC_002754	1277305	1277907	+	SSO1423	10.7435	31.5441	BOTH	2.9361
NC_002754	467825	468256	-	SSO0540	34.1912	31.5417	BOTH	1.084
NC_002754	1143417	1145006	+	SSO1314	17.0583	31.5387	BOTH	1.84888
NC_002754	1241293	1241898	+	SSO1392	28.7926	31.3879	BOTH	1.09014
NC_002754	1739504	1739719	+	SSO9241	31.192	31.3816	BOTH	1.00608
NC_002754	1187882	1189561	+	SSO1351	80.8764	31.3724	BOTH	2.57794
NC_002754	1351270	1352472	+	SSO1498	16.8017	31.3353	BOTH	1.86501
NC_002754	341941	342501	-	SSO0392	51.8883	31.3165	BOTH	1.6569
NC_002754	473189	474277	-	SSO0543	15.0705	31.1857	BOTH	2.06932
NC_002754	534957	535868	-	SSO0614	32.1076	31.1709	BOTH	1.03005
NC_002754	1341997	1342947	+	SSO1484	17.1666	31.0563	BOTH	1.80912
NC_002754	2300018	2300590	-	SSO2531	40.7016	31.0228	BOTH	1.31199
NC_002754	1439908	1441335	+	SSO1595	18.0256	30.9995	BOTH	1.71974
NC_002754	1005978	1006955	-	SSO1167	16.251	30.9062	BOTH	1.9018
NC_002754	1409604	1410179	-	SSO1564	10.0474	30.7411	BOTH	3.0596
NC_002754	1838292	1839959	+	SSO2025	41.48	30.7273	BOTH	1.34994
NC_002754	1044350	1044694	+	SSO1204	29.7941	30.6743	BOTH	1.02954
NC_002754	1779715	1780665	-	SSO1966	16.5308	30.5472	BOTH	1.8479
NC_002754	705741	708023	-	SSO0825	92.6963	30.5089	BOTH	3.03834
NC_002754	2135271	2135543	+	SSO10237	54.4212	30.4033	BOTH	1.78998
NC_002754	1118643	1119617	+	SSO1290	17.9843	30.3628	BOTH	1.68829
NC_002754	1703139	1704038	-	SSO1888	19.387	30.28	BOTH	1.56187
NC_002754	1599778	1600218	-	SSO1766	24.0918	30.2706	BOTH	1.25647
NC_002754	2452659	2453570	-	SSO2700	58.2482	30.2608	BOTH	1.92487
NC_002754	1380370	1381005	+	SSO1529	46.041	30.1249	BOTH	1.52834
NC_002754	1663853	1664752	-	SSO1837	20.3468	30.0495	BOTH	1.47687
NC_002754	1103805	1104530	-	SSO1278	44.6167	30.0107	BOTH	1.48669
NC_002754	1967022	1968209	+	SSO2139	16.8684	29.9843	BOTH	1.77754
NC_002754	100015	102102	-	SSO0121	9.92849	29.913	BOTH	3.01284
NC_002754	1453219	1453848	-	SSO1607	46.4795	29.8628	BOTH	1.55643
NC_002754	2678727	2680679	-	SSO2936	30.8713	29.8557	BOTH	1.03402
NC_002754	1871635	1873161	-	SSO2053	124.278	29.8503	BOTH	4.16337
NC_002754	445862	446953	+	SSO0515	25.6286	29.8333	BOTH	1.16406
NC_002754	1594043	1595182	+	SSO1759	23.716	29.7299	BOTH	1.25358
NC_002754	2371900	2373165	+	SSO2606	16.102	29.612	BOTH	1.83902
NC_002754	1331704	1332129	-	SSO1470	32.2396	29.5505	BOTH	1.091
NC_002754	2761902	2762969	+	SSO3015	33.4836	29.4675	BOTH	1.13629
NC_002754	1350854	1351189	+	SSO1497	23.9082	29.4374	BOTH	1.23127
NC_002754	202755	203297	+	SSO0234	47.5635	29.4249	BOTH	1.61644
NC_002754	1152137	1152748	+	SSO1321	45.0238	29.3849	BOTH	1.53221
NC_002754	728964	729368	+	SSO0849	88.2974	29.3749	BOTH	3.00588
NC_002754	1883264	1884178	-	SSO2066	50.0331	29.1033	BOTH	1.71915
NC_002754	884108	884749	-	SSO1025	10.6291	29.0892	BOTH	2.73676
NC_002754	1445389	1446273	+	SSO1599	3.70888	28.9957	BOTH	7.81791
NC_002754	725782	726456	-	SSO0845	60.6565	28.7942	BOTH	2.10655
NC_002754	114650	115024	-	SSO0138	41.4614	28.7737	BOTH	1.44095
NC_002754	1032029	1033321	+	SSO1188	41.8862	28.7262	BOTH	1.45812
NC_002754	2586859	2587335	-	SSO2825	13.4003	28.7111	BOTH	2.14256
NC_002754	2344187	2344786	-	SSO2572	44.0527	28.7045	BOTH	1.53469
NC_002754	1785726	1786205	+	SSO1972	26.8131	28.5316	BOTH	1.06409
NC_002754	541376	542374	-	SSO0625	41.5893	28.5256	BOTH	1.45797
NC_002754	689456	689974	-	SSO0804	36.7813	28.52	BOTH	1.28967
NC_002754	1621977	1622483	+	SSO1788	14.8222	28.5129	BOTH	1.92365
NC_002754	1252229	1252534	-	SSO1404	15.8077	28.4808	BOTH	1.8017
NC_002754	1000636	1001082	-	SSO1160	19.5171	28.4717	BOTH	1.4588
NC_002754	410443	412068	-	SSO0477	51.2105	28.4582	BOTH	1.7995
NC_002754	1492953	1493198	+	SSO8568	16.8542	28.3981	BOTH	1.68492
NC_002754	1389059	1389868	+	SSO1537	17.1689	28.2648	BOTH	1.64627
NC_002754	2127575	2128387	+	SSO2327	43.0296	28.2456	BOTH	1.52341
NC_002754	1399795	1400979	-	SSO1550	75.444	28.1924	BOTH	2.67604
NC_002754	1769353	1770303	-	SSO1951	15.2592	28.1471	BOTH	1.8446
NC_002754	260097	260906	+	SSO0306	31.9918	28.094	BOTH	1.13874
NC_002754	2711059	2711817	-	SSO2966	20.2573	28.068	BOTH	1.38558
NC_002754	1283924	1284838	+	SSO1431	28.3206	28.045	BOTH	1.00983
NC_002754	1129863	1130912	-	SSO1300	64.3309	27.9964	BOTH	2.29783
NC_002754	1886148	1886732	+	SSO2069	20.3763	27.9035	BOTH	1.36941
NC_002754	2942640	2943566	-	SSO3197	69.1396	27.8312	BOTH	2.48425
NC_002754	2900316	2901368	-	SSO3148	57.8313	27.7853	BOTH	2.08137
NC_002754	1835795	1836595	+	SSO2022	13.4797	27.7188	BOTH	2.05634
NC_002754	3736	4458	+	SSO0007	20.1907	27.6479	BOTH	1.36934
NC_002754	2278488	2280146	+	SSO2510	52.2224	27.642	BOTH	1.88924
NC_002754	1740013	1740423	-	SSO1921	30.0536	27.5997	BOTH	1.08891
NC_002754	2090649	2091539	-	SSO2281	35.5788	27.5584	BOTH	1.29103
NC_002754	381178	381825	-	SSO0440	58.1184	27.5389	BOTH	2.11041
NC_002754	1381020	1381553	+	SSO1530	42.8654	27.4598	BOTH	1.56103
NC_002754	1534379	1534678	+	SSO1680	30.2323	27.4365	BOTH	1.1019
NC_002754	716488	716790	-	SSO0836	66.7077	27.3931	BOTH	2.4352
NC_002754	415401	416033	+	SSO0481	30.4301	27.3174	BOTH	1.11395
NC_002754	109171	110052	-	SSO0129	19.4889	27.2906	BOTH	1.40032
NC_002754	1945703	1946350	+	SSO2121	42.6557	27.2187	BOTH	1.56715
NC_002754	1836633	1837319	+	SSO2023	16.0937	27.1838	BOTH	1.68909
NC_002754	531861	532733	-	SSO0610	30.0789	27.1758	BOTH	1.10683
NC_002754	2893927	2895045	+	SSO3144	14.2033	27.1354	BOTH	1.9105
NC_002754	1486446	1486649	+	SSO8549	30.9097	27.1245	BOTH	1.13955
NC_002754	948084	949358	-	SSO1093	28.4539	27.1245	BOTH	1.04901
NC_002754	1940056	1940829	-	SSO2116	14.9543	27.0772	BOTH	1.81066
NC_002754	1483225	1484361	-	SSO1632	26.5135	27.0709	BOTH	1.02102
NC_002754	1939450	1940055	-	SSO2115	12.1157	27.0507	BOTH	2.2327
NC_002754	1622939	1624333	+	SSO1789	8.8545	27.0225	BOTH	3.05183
NC_002754	808432	809205	+	SSO0953	20.7575	26.9879	BOTH	1.30015
NC_002754	2684976	2685683	+	SSO2940	17.6904	26.9636	BOTH	1.5242
NC_002754	1057452	1058930	+	SSO1218	25.1132	26.9375	BOTH	1.07264
NC_002754	2450948	2452078	+	SSO2697	15.6565	26.7864	BOTH	1.71088
NC_002754	1368467	1368937	-	SSO1515	16.8721	26.7272	BOTH	1.5841
NC_002754	1378387	1379361	+	SSO1526	36.5002	26.6739	BOTH	1.36839
NC_002754	291003	291644	-	SSO0340	22.0654	26.5035	BOTH	1.20113
NC_002754	1626062	1626556	-	SSO1794	46.5917	26.4094	BOTH	1.76421
NC_002754	2977559	2978956	-	SSO3233	15.6938	26.3213	BOTH	1.67717
NC_002754	303854	304849	-	SSO0358	24.9767	26.3198	BOTH	1.05377
NC_002754	1276502	1277293	+	SSO1422	8.28878	26.2872	BOTH	3.17141
NC_002754	2167742	2169007	-	SSO2380	24.2213	26.2793	BOTH	1.08497
NC_002754	729570	730520	+	SSO0850	41.5994	26.256	BOTH	1.58438
NC_002754	1284840	1285598	+	SSO1432	39.9455	26.2454	BOTH	1.522
NC_002754	2336560	2337624	-	SSO2566	61.3161	26.2382	BOTH	2.3369
NC_002754	2186409	2187092	-	SSO2401	18.8162	26.1906	BOTH	1.39192
NC_002754	2523283	2524260	+	SSO2765	9.7153	26.1677	BOTH	2.69345
NC_002754	1173070	1173648	+	SSO1335	17.007	26.1618	BOTH	1.53829
NC_002754	638014	638754	-	SSO0754	15.0374	26.0429	BOTH	1.73187
NC_002754	328136	329296	-	SSO0384	12.3503	26.0347	BOTH	2.10801
NC_002754	227596	228060	-	SSO0264	53.4985	26.0308	BOTH	2.0552
NC_002754	2088749	2089243	+	SSO2278	18.6716	25.9902	BOTH	1.39197
NC_002754	1597288	1598331	-	SSO1763	15.2237	25.971	BOTH	1.70596
NC_002754	1895173	1895739	+	SSO2079	26.3551	25.8616	BOTH	1.01908
NC_002754	2040411	2040887	-	SSO2218	44.1849	25.811	BOTH	1.71187
NC_002754	2687185	2689239	+	SSO2942	56.7025	25.7822	BOTH	2.19929
NC_002754	2910069	2910863	+	SSO3159	66.8206	25.753	BOTH	2.59468
NC_002754	315925	316908	+	SSO0371	15.0986	25.727	BOTH	1.70393
NC_002754	1041723	1041878	-	SSO7399	74.7501	25.7162	BOTH	2.90674
NC_002754	2675835	2676362	+	SSO2931	79.5069	25.6758	BOTH	3.09656
NC_002754	1379369	1380388	+	SSO1527	31.4178	25.5649	BOTH	1.22894
NC_002754	560615	561589	+	SSO0647	15.1493	25.4679	BOTH	1.68112
NC_002754	2073908	2074570	-	SSO2259	23.9721	25.4553	BOTH	1.06187
NC_002754	2524288	2525646	+	SSO2766	36.3562	25.3971	BOTH	1.43151
NC_002754	1300681	1301847	-	SSO1448	19.4665	25.3674	BOTH	1.30313
NC_002754	587703	589946	-	SSO0684	20.3242	25.3368	BOTH	1.24663
NC_002754	2816503	2816748	-	SSO11867	14.3963	25.3052	BOTH	1.75776
[truncated: 815 more rows]

## Sheet: function
Table 3: highest FPKM values
contig	start	end	strand	gene_id	FPKM1	FPKM2	binding	fc	function
NC_002754	337472	338665	+	SSO0390	70907.2	37051.8	BOTH	1.91373	Carboxypeptidase		FPKM: Fragment Per Kilobase of exon model per million mapped reads
NC_002754	1638041	1638670	-	SSO1807	31496.7	9304.58	BOTH	3.38507	membrane bound		Fc = FPKM1/FPKM2
NC_002754	333735	337430	+	SSO0389	27711.8	44969.7	BOTH	1.62276
NC_002754	2393762	2393995	+	SSO10788	23677.1	19119.8	BOTH	1.23836	Predicted redox protein, regulator of disulfide bond formation
NC_002754	500453	500761	+	SSO0567	20294	7096.95	BOTH	2.85954	ATP synthase subunit C
NC_002754	143195	143365	-	SSO5336	14385.2	22409.9	BOTH	1.55784	50S ribosomal protein L40e
NC_002754	816731	817033	-	SSO0962	14315.1	24690.8	BOTH	1.72481	chromatin protein
NC_002754	2379111	2379581	+	SSO2613	14032.3	10256.3	BOTH	1.36816	Peroxiredoxin, bacterioferritin comigratory protein homolog
NC_002754	41328	41528	+	SSO5098	13710	3294.23	BOTH	4.16182	Terminal oxidase, small hydrophobic subunit
NC_002754	40264	41331	+	SSO0045	12688.1	3014.62	BOTH	4.20885	Terminal oxidase, subunit
NC_002754	1606986	1607255	-	SSO8892	11359.3	12396.1	BOTH	1.09127
NC_002754	2369804	2370178	+	SSO2603	11142.3	11167.9	BOTH	1.0023	Small heat shock protein hsp20 family
NC_002754	38481	40262	+	SSO0044	10953.9	3794.67	BOTH	2.88665	Heme bearing subunit I of the terminal oxidase
NC_002754	2158065	2158346	+	SSO10285	6774.23	19411.8	BOTH	2.86554	coenzyme PQQ synthesis protein
NC_002754	751217	751882	+	SSO0881	6553.17	8229.7	BOTH	1.25583	Conserved protein implicated in secretion
NC_002754	2418937	2419497	+	SSO2661	6134.52	8562.23	BOTH	1.39575
NC_002754	2413438	2413560	-	SSO10828	6082.97	5226.37	BOTH	1.1639	Quinol oxidase (SoxABC), cytochrome B subunit, C-terminal part
NC_002754	2419490	2419900	+	SSO2662	5685.6	5674.94	BOTH	1.00188
NC_002754	239345	241018	+	SSO0282	5592.01	5709.38	BOTH	1.02099	Thermosome beta subunit(
NC_002754	2157622	2158068	+	SSO2364	5378.23	31215	BOTH	5.80396	Single-stranded DNA-binding replication protein A
NC_002754	736622	738301	-	SSO0862	5311.16	4616.57	BOTH	1.15046	Thermosome alpha subunit
NC_002754	2320224	2320430	+	SSO10610	5250.27	4334.84	BOTH	1.21118	7 KD DNA-binding protein (SSO7D)
NC_002754	177200	177619	-	SSO0205	4941.64	8295.99	BOTH	1.67879	Uncharacterized protein conserved in archaea
NC_002754	834345	834527	+	SSO6901	4606.82	2949.26	BOTH	1.56203	Double-stranded DNA-binding Cren7
NC_002754	2418081	2419055	+	SSO2660	4265.12	7386.03	BOTH	1.73173	Rieske iron-sulfur protein-1
NC_002754	925904	927847	+	SSO1069	4039.41	4075.3	BOTH	1.00889	Amino acid transporter
NC_002754	2425098	2427179	+	SSO2669	3913.85	2807.63	BOTH	1.394	ABC transporter, periplasmic component
NC_002754	2606453	2608117	-	SSO2847	3847.01	10684.4	BOTH	2.77732	Sugar-binding periplasmic protein
NC_002754	73708	74100	-	SSO0091	3731.61	2583.84	BOTH	1.44421	50S ribosomal protein L7Ae
NC_002754	790181	792706	+	SSO0929	3341.62	1425.93	BOTH	2.34347	Ribonucleotide reductase (nrd)
NC_002754	954091	954474	-	SSO1101	3203.4	3182.25	BOTH	1.00665	Transcriptional regulator, putative
NC_002754	599211	599798	-	SSO0694	3172.77	6350.95	BOTH	2.0017
NC_002754	322456	323946	+	SSO0379	3109.37	7547.11	BOTH	2.42721
NC_002754	2348373	2348657	+	SSO10704	3039.59	5816.63	BOTH	1.91362
